# Supplementary material for: Novel Genomic and Evolutionary Insight of WRKY Transcription Factors in Plant Lineage
Source: PubMed Central journal article supplement (PMC5112548; doi:10.1038/srep37309), 2016-11-17

## **Novel Genomic and Evolutionary Insight of WRKY Transcription Factor in Plant Lineage**

Tapan Kumar Mohanta<sup>1\*</sup>, Yong-Hwan Park<sup>2</sup>, Hanhong Bae<sup>2\*</sup>

<sup>1</sup>Free Major of Natural Sciences, College of Basic Studies, Yeungnam University, Gyeongsan, 38541, Republic of Korea

<sup>2</sup>School of Biotechnology, Yeungnam University, Gyeongsan, 38541, Republic of Korea.

\*Correspondence

Tapan Kumar Mohanta, Email: [nostoc.tapan@gmail.com](mailto:nostoc.tapan@gmail.com)

Hanhong Bae, Email: [hanhongbae@ynu.ac.kr](mailto:hanhongbae@ynu.ac.kr), Fax: +82-53-810-4769

## Supplementary Table 1

Table showing WRKY genes for which nomenclature was applied, locus IDs and other genomic information regarding plant WRKY transcription factors. The WRKY transcription factor data were downloaded from the Arabidopsis Information Resources (<http://www.arabidopsis.org/>), the rice genome annotation project (<http://rice.plantbiology.msu.edu/>), the phytozome database ([www.phytozome.net](http://www.phytozome.net)) and the JGI genome portal (<http://genome.jgi.doe.gov/>)<sup>1-4</sup>.

| WRKY Gene Name            | Locus ID        | ORF Length | No. of Amino acids | No. of Introns | 3'-5' Coordinates              | HMMER E-value |
|---------------------------|-----------------|------------|--------------------|----------------|--------------------------------|---------------|
| <i>Aquilegia coerulea</i> |                 |            |                    |                |                                |               |
| AcWRKY1                   | Aquca_005_00232 | 2949       | 982                | 6              | scaffold_5: 2361204 - 2368192  | 6.5e-115      |
| AcWRKY3                   | Aquca_002_00721 | 1614       | 537                | 3              | scaffold_2: 5595436 - 5599993  | 8.6e-197      |
| AcWRKY5                   | Aquca_053_00058 | 672        | 223                | 3              | scaffold_53: 778849 - 782435   | 2.8e-93       |
| AcWRKY7-1                 | Aquca_007_00730 | 1176       | 391                | 2              | scaffold_7: 5707232 - 5709600  | 1.4e-144      |
| AcWRKY7-2                 | Aquca_083_00093 | 708        | 235                | 2              | scaffold_83: 748397 - 750150   | 4.6e-61       |
| AcWRKY8                   | Aquca_022_00127 | 987        | 328                | 2              | scaffold_22: 1355618 - 1357672 | 3.8e-102      |
| AcWRKY9                   | Aquca_023_00066 | 1479       | 492                | 4              | scaffold_23: 2154836 - 2156885 | 9.7e-113      |
| AcWRKY11                  | Aquca_024_00171 | 1071       | 356                | 2              | scaffold_24: 3887234 - 3888839 | 5.3e-129      |
| AcWRKY14                  | Aquca_030_00369 | 1386       | 461                | 2              | scaffold_30: 2694262 - 2697065 | 2.9e-123      |
| AcWRKY20                  | Aquca_005_00231 | 2004       | 667                | 5              | scaffold_5: 2344028 - 2352075  | 1.9e-189      |
| AcWRKY21-1                | Aquca_049_00056 | 1143       | 380                | 3              | scaffold_49: 638305 - 641475   | 2.6e-137      |
| AcWRKY21-2                | Aquca_049_00050 | 1080       | 359                | 2              | scaffold_49: 587590 - 591270   | 1.9e-137      |
| AcWRKY22                  | Aquca_013_00193 | 1047       | 348                | 2              | scaffold_13: 1237691 - 1239032 | 3.4e-93       |
| AcWRKY26                  | Aquca_005_00209 | 1179       | 592                | 4              | scaffold_5: 2129227 - 2132102  | 2.8e-249      |
| AcWRKY31                  | Aquca_029_00028 | 1005       | 335                | 2              | scaffold_29: 445844 - 447044   | 4.9e-109      |
| AcWRKY32                  | Aquca_016_00233 | 1413       | 470                | 3              | scaffold_16: 3223392 - 3227803 | 7.5e-96       |
| AcWRKY40                  | Aquca_016_00214 | 924        | 307                | 3              | scaffold_16: 3100907 - 3102328 | 3.2e-103      |
| AcWRKY41                  | Aquca_013_00135 | 1041       | 346                | 2              | scaffold_13: 908760 - 910875   | 2.6e-104      |
| AcWRKY42                  | Aquca_066_00022 | 1992       | 663                | 5              | scaffold_66: 367318 - 370158   | 1.4e-209      |
| AcWRKY43                  | Aquca_013_00218 | 624        | 207                | 1              | scaffold_13: 1385362 - 1386568 | 7.1e-66       |
| AcWRKY44                  | Aquca_027_00161 | 1497       | 498                | 6              | scaffold_27: 1528215 - 1532593 | 2.9e-162      |

|                           |                 |      |      |    |                                 |          |
|---------------------------|-----------------|------|------|----|---------------------------------|----------|
| AcWRKY45-1                | Aquca_004_00724 | 2070 | 689  | 11 | scaffold_4: 8716518 - 8724909   | 2.9e-95  |
| AcWRKY45-2                | Aquca_058_00185 | 2478 | 825  | 4  | scaffold_58: 1137106 - 1141693  | 1.9e-236 |
| AcWRKY48                  | Aquca_003_00498 | 915  | 304  | 2  | scaffold_3: 6711681 - 6713059   | 2.1e-79  |
| AcWRKY49                  | Aquca_003_00104 | 939  | 312  | 2  | scaffold_3: 1976003 - 1978372   | 2.1e-81  |
| AcWRKY55                  | Aquca_030_00182 | 1137 | 378  | 2  | scaffold_30: 1293879 - 1295332  | 3.0e-69  |
| AcWRKY57                  | Aquca_002_00789 | 933  | 310  | 3  | scaffold_2: 5992053 - 5996417   | 1.1e-99  |
| AcWRKY65-1                | Aquca_021_00165 | 879  | 292  | 2  | scaffold_21: 3682765 - 3684408  | 9.9e-78  |
| AcWRKY65-2                | Aquca_039_00057 | 843  | 280  | 2  | scaffold_39: 626530 - 628067    | 2.4e-84  |
| AcWRKY70                  | Aquca_027_00037 | 996  | 331  | 2  | scaffold_27: 668402 - 670774    | 3.7e-71  |
| AcWRKY72-1                | Aquca_002_00516 | 1488 | 495  | 4  | scaffold_2: 4256210 - 4258627   | 7.3e-109 |
| AcWRKY72-2                | Aquca_074_00051 | 1839 | 612  | 6  | scaffold_74: 624390 - 627193    | 1.1e-169 |
| AcWRKY75                  | Aquca_011_00107 | 522  | 173  | 1  | scaffold_11: 2178385 - 2179954  | 1.5e-78  |
| <i>Arabidopsis lyrata</i> |                 |      |      |    |                                 |          |
| AIWRKY1                   | 905826          | 426  | 141  | 0  | scaffold_5: 12577179 - 12577644 | 1.7e-274 |
| AIWRKY2                   | 950284          | 2061 | 686  | 3  | scaffold_8: 17407377 - 17409738 | 0.0e+00  |
| AIWRKY3                   | 484242          | 1533 | 510  | 6  | scaffold_5: 1784141 - 1786793   | 0.0e+00  |
| AIWRKY4                   | 471557          | 1533 | 510  | 3  | scaffold_1: 5858986 - 5861764   | 0.0e+00  |
| AIWRKY5-1                 | 483604          | 657  | 218  | 3  | scaffold_4: 21798124 - 21799797 | 1.5e-144 |
| AIWRKY5-2                 | 891177          | 438  | 145  | 1  | scaffold_1: 17172574 - 17173151 | 2.3e-28  |
| AIWRKY5-3                 | 916062          | 441  | 146  | 0  | scaffold_7: 21486253 - 21486733 | 2.3e-186 |
| AIWRKY6                   | 475116          | 1662 | 553  | 7  | scaffold_2: 1850703 - 1853262   | 0.0e+00  |
| AIWRKY7                   | 945679          | 1050 | 349  | 2  | scaffold_7: 7689928 - 7691472   | 1.5e-233 |
| AIWRKY8                   | 494337          | 981  | 326  | 2  | scaffold_8: 1043997 - 1046808   | 1.2e-219 |
| AIWRKY9                   | 908362          | 1083 | 360  | 5  | scaffold_2: 12827437 - 12829301 | 9.9e-218 |
| AIWRKY10                  | 337643          | 1488 | 495  | 4  | scaffold_1: 29398224 - 29400455 | 0.0e+00  |
| AIWRKY11                  | 944827          | 1008 | 335  | 2  | scaffold_7: 4295876 - 4297317   | 3.3e-224 |
| AIWRKY13                  | 490719          | 912  | 303  | 2  | scaffold_7: 549246 - 551666     | 8.3e-186 |
| AIWRKY14                  | 922132          | 1278 | 425  | 2  | scaffold_1: 13788182 - 13790713 | 1.3e-288 |
| AIWRKY15                  | 343891          | 945  | 314  | 2  | scaffold_4: 1770885 - 1772017   | 3.2e-203 |
| AIWRKY16                  | 915648          | 4014 | 1337 | 7  | scaffold_8: 2623905 - 2628796   | 0.0e+00  |
| AIWRKY17                  | 481313          | 960  | 319  | 3  | scaffold_4: 2987446 - 2989377   | 2.5e-211 |
| AIWRKY18                  | 328547          | 1827 | 608  | 6  | scaffold_7: 4175818 - 4179180   | 6.0e-156 |
| AIWRKY20                  | 945405          | 1686 | 561  | 5  | scaffold_7: 6573477 - 6576989   | 0.0e+00  |

|            |        |      |     |    |                                 |          |
|------------|--------|------|-----|----|---------------------------------|----------|
| AIWRKY21-1 | 490447 | 903  | 300 | 2  | scaffold_6: 24436095 - 24437666 | 7.3e-200 |
| AIWRKY21-2 | 933561 | 1113 | 370 | 2  | scaffold_4: 14265900 - 14267352 | 1.4e-246 |
| AIWRKY23   | 902782 | 1014 | 337 | 2  | scaffold_4: 22982627 - 22983989 | 1.4e-192 |
| AIWRKY25   | 481938 | 1185 | 394 | 4  | scaffold_4: 14076363 - 14078173 | 6.7e-269 |
| AIWRKY26   | 325325 | 948  | 315 | 4  | scaffold_6: 2713980 - 2715390   | 1.0e-216 |
| AIWRKY27   | 495347 | 1098 | 365 | 4  | scaffold_8: 15297318 - 15298864 | 1.1e-205 |
| AIWRKY28   | 493050 | 960  | 319 | 3  | scaffold_7: 11003793 - 11005263 | 1.5e-212 |
| AIWRKY29   | 492514 | 912  | 303 | 2  | scaffold_7: 8021855 - 8023128   | 1.3e-201 |
| AIWRKY30   | 489268 | 915  | 304 | 3  | scaffold_6: 10382551 - 10384147 | 1.7e-186 |
| AIWRKY31   | 329411 | 1617 | 538 | 5  | scaffold_7: 8829916 - 8832881   | 0.0e+00  |
| AIWRKY32   | 328625 | 2313 | 770 | 10 | scaffold_7: 4556025 - 4560558   | 7.0e-257 |
| AIWRKY33   | 482857 | 1518 | 505 | 4  | scaffold_4: 18691660 - 18694027 | 0.0e+00  |
| AIWRKY34   | 329038 | 1707 | 568 | 3  | scaffold_7: 6670741 - 6672708   | 0.0e+00  |
| AIWRKY35   | 482446 | 1251 | 416 | 3  | scaffold_4: 16563642 - 16566286 | 5.0e-233 |
| AIWRKY36   | 339216 | 1149 | 382 | 3  | scaffold_2: 14011565 - 14013515 | 2.1e-253 |
| AIWRKY38   | 941764 | 879  | 292 | 2  | scaffold_6: 9443043 - 9444230   | 1.4e-197 |
| AIWRKY39   | 477731 | 999  | 332 | 3  | scaffold_3: 1606487 - 1608449   | 1.7e-225 |
| AIWRKY40   | 477161 | 909  | 302 | 3  | scaffold_2: 18850430 - 18852249 | 1.5e-193 |
| AIWRKY41   | 489946 | 942  | 313 | 2  | scaffold_6: 20734835 - 20736495 | 1.2e-213 |
| AIWRKY42   | 327396 | 1590 | 529 | 5  | scaffold_6: 22370718 - 22373413 | 0.0e+00  |
| AIWRKY43   | 322266 | 342  | 113 | 1  | scaffold_4: 22403749 - 22404189 | 5.1e-74  |
| AIWRKY44   | 482718 | 1302 | 433 | 6  | scaffold_4: 17813521 - 17815687 | 6.6e-265 |
| AIWRKY45   | 927555 | 489  | 162 | 1  | scaffold_3: 41924 - 42520       | 4.1e-81  |
| AIWRKY46-1 | 483794 | 882  | 293 | 5  | scaffold_4: 22508397 - 22509686 | 3.1e-172 |
| AIWRKY46-2 | 324601 | 816  | 271 | 2  | scaffold_5: 20404546 - 20405556 | 4.6e-79  |
| AIWRKY47   | 490404 | 1470 | 489 | 8  | scaffold_6: 24156253 - 24160169 | 0.0e+00  |
| AIWRKY48   | 949445 | 1191 | 396 | 2  | scaffold_8: 13140161 - 13142158 | 7.8e-249 |
| AIWRKY49-1 | 497253 | 818  | 272 | 2  | scaffold_97: 8093 - 9280        | 1.6e-187 |
| AIWRKY49-2 | 952633 | 939  | 312 | 2  | scaffold_97: 2180 - 3433        | 6.1e-181 |
| AIWRKY49-3 | 948846 | 939  | 312 | 2  | scaffold_8: 4545444 - 4546697   | 6.1e-181 |
| AIWRKY49-4 | 915921 | 1401 | 466 | 5  | scaffold_7: 20685830 - 20687752 | 3.2e-185 |
| AIWRKY49-5 | 948847 | 861  | 286 | 3  | scaffold_8: 4551370 - 4552589   | 2.7e-139 |
| AIWRKY50   | 351629 | 522  | 173 | 2  | scaffold_6: 11899118 - 11899990 | 2.1e-112 |

|                             |           |      |      |   |                                 |          |
|-----------------------------|-----------|------|------|---|---------------------------------|----------|
| AIWRKY51                    | 496697    | 585  | 194  | 2 | scaffold_8: 21683217 - 21684558 | 3.5e-128 |
| AIWRKY52-1                  | 915663    | 4083 | 1360 | 6 | scaffold_8: 2768079 - 2773021   | 0.0e+00  |
| AIWRKY52-2                  | 915586    | 3783 | 1260 | 7 | scaffold_8: 2126189 - 2132181   | 0.0e+00  |
| AIWRKY53-1                  | 492487    | 981  | 326  | 4 | scaffold_7: 7891901 - 7893536   | 1.2e-201 |
| AIWRKY54-1                  | 901655    | 1014 | 337  | 2 | scaffold_4: 18125715 - 18127447 | 1.8e-209 |
| AIWRKY54-2                  | 321761    | 1014 | 337  | 2 | scaffold_4: 19866070 - 19867810 | 1.8e-209 |
| AIWRKY55-1                  | 898582    | 807  | 268  | 2 | scaffold_5: 17918917 - 17920050 | 2.6e-65  |
| AIWRKY55-2                  | 321760    | 900  | 299  | 2 | scaffold_4: 19862087 - 19864279 | 9.5e-202 |
| AIWRKY56-1                  | 493831    | 540  | 179  | 2 | scaffold_7: 21435648 - 21437232 | 2.2e-109 |
| AIWRKY56-2                  | 474956    | 588  | 195  | 2 | scaffold_2: 541114 - 543135     | 1.8e-124 |
| AIWRKY57                    | 476056    | 858  | 285  | 9 | scaffold_2: 13681176 - 13684797 | 6.8e-181 |
| AIWRKY58                    | 317082    | 1407 | 468  | 3 | scaffold_3: 405325 - 407429     | 5.1e-250 |
| AIWRKY59                    | 320036    | 609  | 202  | 2 | scaffold_4: 566403 - 568287     | 2.3e-137 |
| AIWRKY60                    | 481352    | 816  | 271  | 7 | scaffold_4: 3596130 - 3598006   | 3.3e-177 |
| AIWRKY61                    | 335144    | 1449 | 482  | 2 | scaffold_1: 7975906 - 7977915   | 7.9e-260 |
| AIWRKY62                    | 892017    | 1059 | 352  | 1 | scaffold_1: 26545448 - 26546643 | 2.5e-159 |
| AIWRKY64                    | 908152    | 726  | 241  | 2 | scaffold_2: 11324804 - 11326123 | 1.9e-128 |
| AIWRKY65                    | 336031    | 780  | 259  | 1 | scaffold_1: 12903516 - 12904393 | 3.7e-173 |
| AIWRKY67                    | 338870    | 705  | 234  | 2 | scaffold_2: 11328558 - 11329667 | 6.2e-119 |
| AIWRKY68                    | 486738    | 807  | 268  | 5 | scaffold_5: 20781766 - 20783610 | 1.2e-132 |
| AIWRKY69                    | 486325    | 816  | 271  | 2 | scaffold_5: 19001767 - 19003563 | 2.6e-182 |
| AIWRKY70                    | 486080    | 897  | 298  | 5 | scaffold_5: 17921880 - 17923430 | 3.4e-202 |
| AIWRKY71                    | 313633    | 846  | 281  | 2 | scaffold_1: 13155154 - 13156374 | 2.9e-191 |
| AIWRKY72                    | 940996    | 1668 | 555  | 3 | scaffold_6: 6153760 - 6156176   | 0.0e+00  |
| AIWRKY74                    | 489657    | 993  | 330  | 4 | scaffold_6: 13917601 - 13918818 | 1.3e-201 |
| AIWRKY75                    | 488124    | 441  | 146  | 1 | scaffold_6: 5241509 - 5242850   | 4.9e-95  |
| <i>Arabidopsis thaliana</i> |           |      |      |   |                                 |          |
| AtWRKY1                     | AT2G04880 | 1464 | 487  | 3 | Chr2: 1717888-1720526           | 0.0e+00  |
| AtWRKY2                     | AT5G56270 | 2064 | 687  | 4 | Chr5: 22779693-22783268         | 0.0e+00  |
| AtWRKY3                     | AT2G03340 | 1542 | 513  | 3 | Chr2: 1014350-1017148           | 0.0e+00  |
| AtWRKY4                     | AT1G13960 | 1545 | 514  | 3 | Chr1: 4776463-4779400           | 0.0e+00  |
| AtWRKY5                     | AT2G44745 | 657  | 218  | 3 | Chr2: 18447273-18449009         | 4.8e-147 |
| AtWRKY6                     | AT1G62300 | 1662 | 553  | 5 | Chr1: 23016683-23019279         | 0.0e+00  |

|          |           |      |      |    |                          |          |
|----------|-----------|------|------|----|--------------------------|----------|
| AtWRKY7  | AT4G24240 | 1062 | 353  | 2  | Chr4: 12571766-12573725  | 1.7e-235 |
| AtWRKY8  | AT5G46350 | 981  | 326  | 2  | Chr5: 18801218-18804043  | 4.6e-219 |
| AtWRKY9  | AT1G68150 | 1120 | 374  | 4  | Chr1: 25543969-25545717  | 2.7e-246 |
| AtWRKY10 | AT1G55600 | 1458 | 485  | 4  | Chr1: 20774046-20776294  | 0.0e+00  |
| AtWRKY11 | AT4G31550 | 978  | 325  | 2  | Chr4: 15289947-15291539  | 6.8e-217 |
| AtWRKY12 | AT3G32090 | 549  | 182  | 3  | Chr3: 13078956-13079921  | 1.0e-118 |
| AtWRKY13 | AT4G39410 | 915  | 304  | 2  | Chr4: 18332878-18334789  | 9.8e-206 |
| AtWRKY14 | AT1G30650 | 1293 | 430  | 2  | Chr1: 10868303-10871297  | 3.8e-293 |
| AtWRKY15 | AT2G23320 | 954  | 317  | 2  | Chr2: 9924933-9926372    | 3.3e-203 |
| AtWRKY16 | AT5G45050 | 4119 | 1372 | 6  | Chr5: 18176914-18181805  | 0.0e+00  |
| AtWRKY17 | AT2G24570 | 966  | 321  | 2  | Chr2: 10437398-10439298  | 5.9e-213 |
| AtWRKY18 | AT4G31800 | 933  | 310  | 4  | Chr4: 15383201-15385029  | 3.3e-204 |
| AtWRKY19 | AT4G12020 | 5688 | 1895 | 13 | Chr4: 7201656-7209648    | 0.0e+00  |
| AtWRKY20 | AT4G26640 | 1674 | 557  | 5  | Chr4: 13437071-13440835  | 0.0e+00  |
| AtWRKY21 | AT2G30590 | 1143 | 380  | 2  | Chr2: 13033476-13035593  | 4.7e-251 |
| AtWRKY22 | AT4G01250 | 897  | 298  | 2  | Chr4: 522604-524216      | 3.7e-198 |
| AtWRKY23 | AT2G47260 | 1014 | 337  | 2  | Chr2: 194048820-19407084 | 1.1e-224 |
| AtWRKY24 | AT5G41570 | 540  | 179  | 1  | Chr5: 16624214-16625977  | 1.7e-121 |
| AtWRKY25 | AT2G30250 | 1182 | 393  | 4  | Chr2: 12903236-12905198  | 5.2e-267 |
| AtWRKY26 | AT5G07100 | 930  | 309  | 4  | Chr5: 2204248-2205811    | 8.6e-212 |
| AtWRKY27 | AT5G52830 | 1047 | 348  | 2  | Chr5: 21410852-21412340  | 1.7e-235 |
| AtWRKY28 | AT4G18170 | 957  | 318  | 2  | Chr4: 10061673-10062841  | 2.8e-213 |
| AtWRKY29 | AT4G23550 | 915  | 304  | 2  | Chr4: 12291820-12293095  | 2.1e-201 |
| AtWRKY30 | AT5G24110 | 912  | 303  | 2  | Chr5: 8153115-8154709    | 2.3e-205 |
| AtWRKY31 | AT4G22070 | 1617 | 538  | 5  | Chr4: 11691378-11694392  | 0.0e+00  |
| AtWRKY32 | AT4G30935 | 1401 | 466  | 4  | Chr4: 15051814-15054042  | 6.2e-309 |
| AtWRKY33 | AT2G38470 | 1560 | 519  | 4  | Chr2: 16108361-16110766  | 0.0e+00  |
| AtWRKY34 | AT4G26440 | 1707 | 568  | 3  | Chr4: 13357596-13359551  | 0.0e+00  |
| AtWRKY35 | AT2G34830 | 1284 | 427  | 2  | Chr2: 14693756-14696378  | 4.0e-285 |
| AtWRKY36 | AT1G69810 | 1164 | 387  | 3  | Chr1: 26277238-26279118  | 1.6e-255 |
| AtWRKY38 | AT5G22570 | 870  | 289  | 2  | Chr5: 7495539-7496784    | 5.4e-195 |
| AtWRKY39 | AT3G04670 | 993  | 330  | 2  | Chr3: 1266242-1268350    | 6.6e-224 |
| AtWRKY40 | AT1G80840 | 909  | 302  | 3  | Chr1: 30383691-30385499  | 1.0e-195 |

|          |           |      |      |   |                         |          |
|----------|-----------|------|------|---|-------------------------|----------|
| AtWRKY41 | AT4G11070 | 942  | 313  | 2 | Chr4: 6759303-6760794   | 6.9e-214 |
| AtWRKY42 | AT4G04450 | 1587 | 528  | 5 | Chr4: 2218379-2221114   | 0.0e+00  |
| AtWRKY43 | AT2G46130 | 330  | 109  | 1 | Chr2: 18957226-18957911 | 7.0e-71  |
| AtWRKY44 | AT2G37260 | 1290 | 429  | 4 | Chr2: 15644840-15647065 | 2.8e-289 |
| AtWRKY45 | AT3G01970 | 444  | 147  | 1 | Chr3: 326397-327412     | 2.6e-100 |
| AtWRKY46 | AT2G46400 | 888  | 295  | 2 | Chr2: 19043414-19044826 | 5.7e-194 |
| AtWRKY47 | AT4G01720 | 1470 | 489  | 5 | Chr4: 744921-748554     | 0.0e+00  |
| AtWRKY48 | AT5G49520 | 1200 | 399  | 2 | Chr5: 20090776-20093346 | 2.2e-261 |
| AtWRKY49 | AT5G43290 | 825  | 274  | 2 | Chr5: 17371838-17373201 | 6.3e-190 |
| AtWRKY50 | AT5G26170 | 522  | 173  | 2 | Chr5: 9147176-9148128   | 6.4e-114 |
| AtWRKY51 | AT5G64810 | 585  | 194  | 2 | Chr5: 25908413-25909803 | 7.9e-127 |
| AtWRKY52 | AT5G45260 | 3867 | 1288 | 6 | Chr5: 18326203-18332609 | 0.0e+00  |
| AtWRKY53 | AT4G23810 | 975  | 324  | 1 | Chr4: 12392370-12393982 | 4.0e-220 |
| AtWRKY54 | AT2G40750 | 1041 | 346  | 2 | Chr2: 17000454-17002468 | 1.1e-234 |
| AtWRKY55 | AT2G40740 | 879  | 292  | 2 | Chr2: 16997177-16999277 | 4.8e-195 |
| AtWRKY56 | AT1G64000 | 588  | 195  | 1 | Chr1: 23747304-23749053 | 3.6e-132 |
| AtWRKY57 | AT1G69310 | 864  | 287  | 4 | Chr1: 26054308-26058105 | 4.0e-194 |
| AtWRKY58 | AT3G01080 | 1272 | 423  | 4 | Chr3: 25507-27449       | 1.1e-293 |
| AtWRKY59 | AT2G21900 | 609  | 202  | 2 | Chr2: 9334149-933622    | 7.8e-136 |
| AtWRKY60 | AT2G25000 | 816  | 271  | 4 | Chr2: 10629737-10631413 | 2.6e-177 |
| AtWRKY61 | AT1G18860 | 1443 | 480  | 2 | Chr1: 6509492-6511227   | 0.0e+00  |
| AtWRKY62 | AT5G01900 | 792  | 263  | 1 | Chr5: 351008-352069     | 2.5e-178 |
| AtWRKY63 | AT1G66600 | 726  | 241  | 2 | Chr1: 24848320-24849364 | 4.4e-164 |
| AtWRKY64 | AT1G66560 | 750  | 249  | 2 | Chr1: 24833579-24834631 | 1.3e-169 |
| AtWRKY65 | AT1G29280 | 780  | 259  | 1 | Chr1: 10236367-10237467 | 8.0e-174 |
| AtWRKY66 | AT1G80590 | 708  | 235  | 2 | Chr1: 30296210-30297156 | 1.4e-161 |
| AtWRKY67 | AT1G66550 | 765  | 254  | 2 | Chr1: 24828502-24829639 | 2.7e-175 |
| AtWRKY68 | AT3G62340 | 834  | 277  | 2 | Chr3: 23069516-23071207 | 2.1e-190 |
| AtWRKY69 | AT3G58710 | 819  | 272  | 2 | Chr3: 21715007-21716916 | 2.1e-180 |
| AtWRKY70 | AT3G56400 | 885  | 294  | 2 | Chr3: 20908928-2091048  | 3.8e-199 |
| AtWRKY71 | AT1G29860 | 849  | 282  | 2 | Chr1: 10454482-10455785 | 1.9e-189 |
| AtWRKY72 | AT5G15130 | 1647 | 548  | 3 | Chr5: 4904347-4907094   | 0.0e+00  |
| AtWRKY74 | AT5G28650 | 993  | 330  | 2 | Chr5: 10677716-10679204 | 1.7e-221 |

|                                |              |      |     |   |                          |          |
|--------------------------------|--------------|------|-----|---|--------------------------|----------|
| AtWRKY75                       | AT5G13080    | 438  | 145 | 1 | Chr5: 4149740-4151150    | 7.1e-94  |
| <i>Brachypodium distachyon</i> |              |      |     |   |                          |          |
| BdWRKY1                        | Bradi2g08620 | 1902 | 633 | 6 | Bd2: 6965062 - 6969356   | 0.0e+00  |
| BdWRKY2                        | Bradi3g34567 | 1059 | 352 | 1 | Bd3: 36924565 - 36925829 | 2.9e-235 |
| BdWRKY3                        | Bradi1g08106 | 945  | 314 | 3 | Bd1: 5717785 - 5722044   | 3.3e-204 |
| BdWRKY4                        | Bradi1g07970 | 1242 | 413 | 3 | Bd1: 5619653 - 5623406   | 8.2e-283 |
| BdWRKY7                        | Bradi2g18530 | 732  | 243 | 1 | Bd2: 16474142 - 16475652 | 5.3e-156 |
| BdWRKY8                        | Bradi2g15360 | 912  | 303 | 2 | Bd2: 13707176 - 13708809 | 1.3e-201 |
| BdWRKY9                        | Bradi2g11170 | 1542 | 513 | 4 | Bd2: 9403194 - 9408009   | 0.0e+00  |
| BdWRKY10                       | Bradi2g05510 | 636  | 211 | 0 | Bd2: 3983627 - 3984262   | 1.0e-145 |
| BdWRKY11                       | Bradi2g44090 | 1029 | 342 | 2 | Bd2: 44578672 - 44580858 | 1.3e-236 |
| BdWRKY12                       | Bradi2g44035 | 1017 | 338 | 2 | Bd2: 44527990 - 44529664 | 2.2e-228 |
| BdWRKY13                       | Bradi2g49906 | 903  | 300 | 2 | Bd2: 49904315 - 49905775 | 4.5e-201 |
| BdWRKY14                       | Bradi2g48907 | 828  | 275 | 1 | Bd2: 49070580 - 49071586 | 2.5e-183 |
| BdWRKY15                       | Bradi2g45480 | 963  | 320 | 2 | Bd2: 45857664 - 45858974 | 2.7e-217 |
| BdWRKY16                       | Bradi2g45900 | 1146 | 381 | 2 | Bd2: 46341174 - 46344108 | 1.3e-254 |
| BdWRKY17                       | Bradi2g62130 | 762  | 253 | 2 | Bd2: 58924622 - 58926999 | 5.1e-168 |
| BdWRKY18-1                     | Bradi2g53495 | 861  | 286 | 2 | Bd2: 52632487 - 52636282 | 6.7e-196 |
| BdWRKY18-2                     | Bradi4g30370 | 756  | 251 | 3 | Bd4: 36119270 - 36124180 | 1.3e-168 |
| BdWRKY19                       | Bradi2g15877 | 681  | 226 | 1 | Bd2: 14040691 - 14041846 | 3.7e-148 |
| BdWRKY20                       | Bradi2g53500 | 849  | 282 | 2 | Bd2: 52646076 - 52649410 | 7.5e-194 |
| BdWRKY21                       | Bradi2g53520 | 852  | 283 | 1 | Bd2: 52664751 - 52666466 | 1.9e-185 |
| BdWRKY22                       | Bradi2g53480 | 282  | 75  | 2 | Bd2: 52621457 - 52623072 | 8.9e-47  |
| BdWRKY23-1                     | Bradi2g49020 | 669  | 222 | 1 | Bd2: 49173622 - 49177995 | 1.4e-152 |
| BdWRKY23-2                     | Bradi2g19070 | 717  | 238 | 1 | Bd2: 16801079 - 16803652 | 1.3e-155 |
| BdWRKY24                       | Bradi2g53760 | 1731 | 576 | 3 | Bd2: 52860054 - 52862718 | 0.0e+00  |
| BdWRKY25                       | Bradi3g18580 | 921  | 306 | 0 | Bd3: 17079848 - 17080892 | 8.0e-196 |
| BdWRKY26                       | Bradi2g48090 | 651  | 216 | 2 | Bd2: 48426948 - 48428121 | 2.8e-143 |
| BdWRKY28                       | Bradi1g30870 | 981  | 326 | 1 | Bd1: 26329079 - 26330580 | 7.6e-207 |
| BdWRKY30                       | Bradi3g39340 | 1698 | 565 | 4 | Bd3: 41662537 - 41665191 | 0.0e+00  |
| BdWRKY32                       | Bradi3g57710 | 1680 | 559 | 4 | Bd3: 57392174 - 57394564 | 0.0e+00  |
| BdWRKY34                       | Bradi3g50360 | 735  | 244 | 3 | Bd3: 51584113 - 51587575 | 1.3e-171 |
| BdWRKY35                       | Bradi5g13090 | 2187 | 728 | 4 | Bd5: 16639846 - 16643118 | 0.0e+00  |



|            |              |      |     |   |                          |          |
|------------|--------------|------|-----|---|--------------------------|----------|
| BdWRKY36   | Bradi5g17395 | 591  | 196 | 3 | Bd5: 20674827 - 20679112 | 9.0e-135 |
| BdWRKY37   | Bradi5g20290 | 1200 | 399 | 2 | Bd5: 23193818 - 23196993 | 4.6e-268 |
| BdWRKY39   | Bradi3g09810 | 1077 | 358 | 2 | Bd3: 8007304 - 8009064   | 4.9e-241 |
| BdWRKY43   | Bradi2g16150 | 1689 | 562 | 3 | Bd2: 14220256 - 14222873 | 0.0e+00  |
| BdWRKY45-1 | Bradi2g30695 | 834  | 277 | 2 | Bd2: 30388047 - 30389483 | 1.8e-190 |
| BdWRKY45-2 | Bradi2g44270 | 879  | 292 | 2 | Bd2: 44782012 - 44783510 | 4.8e-196 |
| BdWRKY46   | Bradi4g25717 | 720  | 239 | 2 | Bd4: 31073069 - 31076118 | 2.1e-161 |
| BdWRKY47   | Bradi1g17660 | 984  | 327 | 2 | Bd1: 14207355 - 14209349 | 1.0e-215 |
| BdWRKY49   | Bradi2g16357 | 1254 | 417 | 2 | Bd2: 14427911 - 14430851 | 1.5e-283 |
| BdWRKY51   | Bradi5g04817 | 936  | 311 | 2 | Bd5: 6203333 - 6204805   | 5.5e-206 |
| BdWRKY53-1 | Bradi4g01950 | 1326 | 441 | 3 | Bd4: 1276705 - 1278729   | 1.9e-298 |
| BdWRKY53-2 | Bradi2g00280 | 1161 | 386 | 3 | Bd2: 37729 - 39452       | 4.2e-263 |
| BdWRKY55   | Bradi1g63910 | 630  | 209 | 2 | Bd1: 63118295 - 63119746 | 9.5e-144 |
| BdWRKY57-1 | Bradi1g47690 | 885  | 294 | 4 | Bd1: 46394072 - 46396455 | 2.2e-201 |
| BdWRKY57-2 | Bradi4g45290 | 1008 | 335 | 4 | Bd4: 48418327 - 48421147 | 1.6e-229 |
| BdWRKY57-3 | Bradi1g02327 | 1011 | 336 | 3 | Bd1: 1580840 - 1582503   | 7.6e-231 |
| BdWRKY59   | Bradi4g09890 | 2847 | 948 | 4 | Bd4: 9350003 - 9357060   | 0.0e+00  |
| BdWRKY60-1 | Bradi1g13207 | 396  | 131 | 2 | Bd1: 10018214 - 10019283 | 1.3e-85  |
| BdWRKY60-2 | Bradi2g30800 | 1032 | 343 | 2 | Bd2: 30398035 - 30400975 | 2.2e-230 |
| BdWRKY65   | Bradi4g44342 | 981  | 326 | 1 | Bd4: 47782844 - 47784664 | 6.7e-221 |
| BdWRKY66   | Bradi3g52420 | 1371 | 456 | 2 | Bd3: 53316886 - 53321459 | 1.0e-312 |
| BdWRKY67   | Bradi2g33540 | 498  | 165 | 0 | Bd2: 33674702 - 33675549 | 1.5e-110 |
| BdWRKY68   | Bradi5g20700 | 936  | 311 | 2 | Bd5: 23482100 - 23483388 | 7.2e-202 |
| BdWRKY69   | Bradi3g34850 | 927  | 308 | 1 | Bd3: 37214494 - 37216071 | 9.4e-208 |
| BdWRKY70   | Bradi2g22440 | 1524 | 507 | 2 | Bd2: 19960366 - 19962573 | 0.0e+00  |
| BdWRKY71   | Bradi3g06070 | 1038 | 345 | 1 | Bd3: 4354442 - 4356174   | 9.1e-229 |
| BdWRKY72   | Bradi4g19060 | 627  | 208 | 1 | Bd4: 21655844 - 21659743 | 2.0e-139 |
| BdWRKY73   | Bradi1g51030 | 1878 | 625 | 6 | Bd1: 49453669 - 49457672 | 0.0e+00  |
| BdWRKY74   | Bradi4g28280 | 978  | 325 | 2 | Bd4: 33637416 - 33639521 | 4.5e-219 |
| BdWRKY76   | Bradi4g30360 | 1020 | 339 | 3 | Bd4: 36105434 - 36107137 | 1.3e-220 |
| BdWRKY78   | Bradi1g23340 | 1818 | 605 | 5 | Bd1: 18715369 - 18721624 | 0.0e+00  |
| BdWRKY79   | Bradi1g63220 | 933  | 310 | 2 | Bd1: 62421625 - 62422845 | 5.7e-200 |
| BdWRKY80   | Bradi4g33370 | 2073 | 690 | 5 | Bd4: 39074575 - 39078767 | 0.0e+00  |

|                      |              |      |     |   |                                 |          |
|----------------------|--------------|------|-----|---|---------------------------------|----------|
| BdWRKY82             | Bradi3g19640 | 1755 | 584 | 3 | Bd3: 18514071 - 18520937        | 0.0e+00  |
| BdWRKY83-1           | Bradi4g02680 | 1062 | 353 | 3 | Bd4: 1992612 - 1995531          | 7.0e-235 |
| BdWRKY83-2           | Bradi1g14300 | 1038 | 345 | 3 | Bd1: 11188970 - 11191904        | 1.6e-231 |
| BdWRKY85             | Bradi4g06690 | 1506 | 501 | 3 | Bd4: 5576052 - 5581378          | 0.0e+00  |
| BdWRKY86             | Bradi2g53510 | 753  | 250 | 2 | Bd2: 52655598 - 52657803        | 4.0e-167 |
| BdWRKY87             | Bradi1g09170 | 1266 | 421 | 3 | Bd1: 6545010 - 6548310          | 1.5e-282 |
| BdWRKY90-1           | Bradi4g44360 | 756  | 251 | 2 | Bd4: 47797837 - 47799556        | 3.4e-166 |
| BdWRKY90-2           | Bradi4g44350 | 780  | 259 | 2 | Bd4: 47786980 - 47788750        | 2.5e-172 |
| BdWRKY90-3           | Bradi4g44370 | 819  | 272 | 2 | Bd4: 47804750 - 47805919        | 3.5e-183 |
| BdWRKY91             | Bradi2g22230 | 894  | 297 | 2 | Bd2: 19779563 - 19782548        | 1.3e-192 |
| BdWRKY92             | Bradi2g15405 | 930  | 309 | 2 | Bd2: 13729497 - 13730737        | 6.4e-202 |
| BdWRKY93             | Bradi1g48770 | 1068 | 355 | 2 | Bd1: 47430434 - 47433797        | 9.2e-240 |
| BdWRKY96             | Bradi1g22680 | 1344 | 447 | 3 | Bd1: 18197079 - 18200281        | 7.6e-310 |
| BdWRKY97             | Bradi2g05500 | 1599 | 532 | 2 | Bd2: 3979821 - 3981719          | 0.0e+00  |
| BdWRKY102            | Bradi2g05234 | 681  | 226 | 2 | Bd2: 3818524 - 3823413          | 1.1e-153 |
| BdWRKY105            | Bradi1g16120 | 1476 | 491 | 3 | Bd1: 13043037 - 13049431        | 0.0e+00  |
| BdWRKY106            | Bradi2g54720 | 864  | 287 | 1 | Bd2: 53553539 - 53556063        | 2.3e-195 |
| <i>Brassica rapa</i> |              |      |     |   |                                 |          |
| BrWRKY1              | Bra013187    | 1344 | 447 | 3 | A03: 19971615 - 19973447        | 4.1e-294 |
| BrWRKY2-1            | Bra028939    | 1350 | 449 | 2 | A03: 5507782 - 5509290          | 4.3e-303 |
| BrWRKY2-2            | Bra002828    | 2022 | 673 | 3 | A10: 7308456 - 7310721          | 0.0e+00  |
| BrWRKY3-1            | Bra026554    | 1428 | 475 | 3 | A02: 20181641 - 20183548        | 1.2e-30  |
| BrWRKY3-2            | Bra024780    | 1461 | 486 | 3 | A06: 23398422 - 23400354        | 0.0e+00  |
| BrWRKY4-1            | Bra026869    | 1443 | 480 | 2 | A09: 34052814 - 34054790        | 0.0e+00  |
| BrWRKY4-2            | Bra019697    | 1482 | 493 | 3 | A06: 4910724 - 4912882          | 0.0e+00  |
| BrWRKY4-3            | Bra016716    | 1398 | 465 | 3 | A08: 19652034 - 19653979        | 1.1e-309 |
| BrWRKY5-1            | Bra037637    | 546  | 181 | 3 | A04: 18386470 - 18387608        | 1.5e-119 |
| BrWRKY5-2            | Bra004864    | 648  | 215 | 3 | A05: 2169762 - 2171241          | 5.0e-145 |
| BrWRKY5-3            | Bra000362    | 633  | 210 | 3 | A03: 10731875 - 10733550        | 5.2e-142 |
| BrWRKY6-1            | Bra027057    | 1659 | 552 | 5 | A09: 8074041 - 8076449          | 0.0e+00  |
| BrWRKY6-2            | Bra034482    | 1524 | 507 | 6 | Scaffold000096: 241928 - 244473 | 0.0e+00  |
| BrWRKY7-1            | Bra013779    | 432  | 143 | 3 | A01: 7725525 - 7726849          | 1.3e-93  |
| BrWRKY7-2            | Bra019239    | 1047 | 348 | 3 | A03: 25526576 - 25528473        | 4.6e-232 |

|            |           |      |     |    |                               |          |
|------------|-----------|------|-----|----|-------------------------------|----------|
| BrWRKY8-1  | Bra022033 | 954  | 317 | 2  | A02: 18718294 - 18724024      | 1.2e-29  |
| BrWRKY8-2  | Bra025021 | 972  | 323 | 2  | A06: 24733571 - 24736005      | 8.8e-217 |
| BrWRKY8-3  | Bra017561 | 966  | 321 | 2  | A09: 16500923 - 16504686      | 4.2e-246 |
| BrWRKY9-1  | Bra033956 | 2133 | 710 | 15 | A02: 10623625 - 10628895      | 0.0e+00  |
| BrWRKY9-2  | Bra004285 | 987  | 238 | 4  | A07: 17788706 - 17790449      | 5.9e-214 |
| BrWRKY10-1 | Bra030847 | 1344 | 447 | 4  | A08: 239211 - 241785          | 5.2e-309 |
| BrWRKY10-2 | Bra038006 | 1965 | 654 | 4  | A06: 152241 - 154947          | 0.0e+00  |
| BrWRKY10-3 | Bra037106 | 1299 | 432 | 4  | A05: 10124867 - 10126756      | 1.3e-295 |
| BrWRKY10-4 | Bra030848 | 612  | 203 | 3  | A08: 251554 - 252566          | 4.3e-135 |
| BrWRKY11-1 | Bra011282 | 969  | 322 | 2  | A01: 2951676 - 2953056        | 7.0e-214 |
| BrWRKY11-2 | Bra010231 | 999  | 332 | 2  | A08: 13321033 - 13322465      | 5.4e-220 |
| BrWRKY11-3 | Bra023998 | 987  | 328 | 2  | A03: 28325809 - 28327190      | 2.2e-220 |
| BrWRKY13-1 | Bra010683 | 891  | 296 | 2  | A08: 15966809 - 15969142      | 3.9e-203 |
| BrWRKY13-2 | Bra033616 | 879  | 292 | 2  | A06: 25990144 - 25992652      | 4.2e-200 |
| BrWRKY13-3 | Bra011861 | 897  | 298 | 2  | A01: 182416 - 184570          | 5.8e-205 |
| BrWRKY14-1 | Bra041029 | 1224 | 407 | 2  | Scaffold000396: 12230 - 14468 | 5.4e-30  |
| BrWRKY14-2 | Bra026228 | 1191 | 396 | 2  | A01: 10537643 - 10539822      | 8.5e-267 |
| BrWRKY15   | Bra032174 | 960  | 319 | 2  | A04: 10336494 - 10337630      | 6.3e-208 |
| BrWRKY17   | Bra032084 | 978  | 325 | 2  | A04: 10985430 - 10986845      | 1.0e-214 |
| BrWRKY18-1 | Bra010220 | 927  | 308 | 4  | A08: 13246799 - 13248642      | 7.0e-205 |
| BrWRKY18-2 | Bra011299 | 954  | 317 | 4  | A01: 2868582 - 2869908        | 2.6e-205 |
| BrWRKY20-1 | Bra026414 | 1608 | 535 | 5  | A01: 9431629 - 9434410        | 0.0e+00  |
| BrWRKY20-2 | Bra010431 | 1638 | 545 | 5  | A08: 14491517 - 14494585      | 0.0e+00  |
| BrWRKY20-3 | Bra019095 | 2265 | 754 | 12 | A03: 26340990 - 26350088      | 0.0e+00  |
| BrWRKY20-4 | Bra028971 | 1458 | 485 | 5  | A03: 5651051 - 5653183        | 0.0e+00  |
| BrWRKY21-1 | Bra021652 | 966  | 321 | 2  | A04: 13660758 - 13661885      | 3.8e-214 |
| BrWRKY21-2 | Bra018303 | 1008 | 335 | 2  | A05: 7312863 - 7314031        | 1.2e-223 |
| BrWRKY21-3 | Bra022808 | 1017 | 338 | 2  | A03: 7166015 - 7167214        | 7.3e-225 |
| BrWRKY22   | Bra037368 | 897  | 298 | 2  | A09: 846055 - 847193          | 1.8e-196 |
| BrWRKY23-1 | Bra021393 | 972  | 323 | 2  | A01: 25404906 - 25406091      | 2.5e-218 |
| BrWRKY23-2 | Bra004466 | 960  | 319 | 2  | A05: 274575 - 276116          | 2.2e-213 |
| BrWRKY24   | Bra025490 | 525  | 174 | 1  | A04: 8404080 - 8407561        | 1.2e-119 |
| BrWRKY25-1 | Bra018325 | 1122 | 373 | 4  | A05: 7467357 - 7468865        | 6.4e-254 |

|            |           |      |     |   |                               |          |
|------------|-----------|------|-----|---|-------------------------------|----------|
| BrWRKY25-2 | Bra022786 | 1137 | 378 | 4 | A03: 7048063 - 7049645        | 1.6e-257 |
| BrWRKY25-3 | Bra021623 | 1053 | 350 | 4 | A04: 13500274 - 13501648      | 1.2e-235 |
| BrWRKY26   | Bra028707 | 960  | 319 | 3 | A02: 2443741 - 2445256        | 4.7e-29  |
| BrWRKY27   | Bra022612 | 1035 | 344 | 2 | A02: 8534510 - 8535740        | 1.8e-30  |
| BrWRKY28-1 | Bra012614 | 939  | 312 | 2 | A03: 23210602 - 23211724      | 1.9e-208 |
| BrWRKY28-2 | Bra013289 | 927  | 308 | 2 | A01: 4763091 - 4764234        | 9.5e-204 |
| BrWRKY28-3 | Bra040926 | 885  | 294 | 2 | Scaffold000316: 18877 - 20035 | 6.5e-31  |
| BrWRKY29-1 | Bra019297 | 900  | 299 | 2 | A03: 25119154 - 25120401      | 6.8e-199 |
| BrWRKY29-2 | Bra020814 | 927  | 308 | 2 | A08: 11972081 - 11973603      | 2.0e-199 |
| BrWRKY29-3 | Bra013708 | 891  | 296 | 2 | A01: 7304758 - 7306085        | 2.2e-197 |
| BrWRKY30-1 | Bra009734 | 942  | 313 | 2 | A06: 16910398 - 16911760      | 4.0e-211 |
| BrWRKY30-2 | Bra026467 | 939  | 312 | 2 | A01: 9132853 - 9134359        | 9.2e-212 |
| BrWRKY31   | Bra013584 | 1617 | 538 | 5 | A01: 6468156 - 6471174        | 0.0e+00  |
| BrWRKY32-1 | Bra024035 | 1770 | 589 | 4 | A03: 28045703 - 28048028      | 0.0e+00  |
| BrWRKY32-2 | Bra010266 | 1374 | 457 | 4 | A08: 13536241 - 13538271      | 4.4e-302 |
| BrWRKY33-1 | Bra017117 | 1392 | 463 | 3 | A04: 16526854 - 16528558      | 0.0e+00  |
| BrWRKY33-2 | Bra005104 | 1374 | 457 | 4 | A05: 3439967 - 3443129        | 2.6e-309 |
| BrWRKY33-3 | Bra000064 | 1422 | 473 | 4 | A03: 9129420 - 9131325        | 4.2e-315 |
| BrWRKY34-1 | Bra026438 | 1605 | 534 | 3 | A01: 9303958 - 9305798        | 0.0e+00  |
| BrWRKY34-2 | Bra019105 | 1590 | 529 | 3 | A03: 26297993 - 26299836      | 0.0e+00  |
| BrWRKY35-1 | Bra021934 | 1191 | 396 | 2 | A04: 15267024 - 15269622      | 4.0e-267 |
| BrWRKY35-2 | Bra005388 | 1212 | 403 | 2 | A05: 5155344 - 5157950        | 1.4e-264 |
| BrWRKY36-1 | Bra007884 | 1152 | 383 | 3 | A02: 11577278 - 11579396      | 3.6e-29  |
| BrWRKY36-2 | Bra016263 | 2247 | 748 | 7 | A07: 18564900 - 18568514      | 0.0e+00  |
| BrWRKY38-1 | Bra002421 | 867  | 288 | 2 | A10: 9693974 - 9695104        | 1.2e-195 |
| BrWRKY38-2 | Bra020196 | 855  | 284 | 2 | A02: 5509636 - 5510789        | 1.4e-194 |
| BrWRKY38-3 | Bra020197 | 843  | 280 | 3 | A02: 5515325 - 5516544        | 3.4e-190 |
| BrWRKY39-1 | Bra040396 | 912  | 303 | 2 | Scaffold000203: 12865 - 13907 | 4.4e-204 |
| BrWRKY39-2 | Bra001117 | 960  | 319 | 2 | A03: 14838129 - 14839229      | 1.5e-214 |
| BrWRKY40-1 | Bra008435 | 873  | 290 | 3 | A02: 15608697 - 15610784      | 8.6e-186 |
| BrWRKY40-2 | Bra035148 | 903  | 300 | 3 | A07: 22365779 - 22367318      | 3.2e-193 |
| BrWRKY40-3 | Bra003588 | 894  | 297 | 3 | A07: 13952832 - 13954369      | 6.4e-190 |
| BrWRKY41   | Bra033158 | 996  | 331 | 2 | A02: 17058445 - 17059657      | 1.4e-228 |

|            |           |      |     |   |                               |          |
|------------|-----------|------|-----|---|-------------------------------|----------|
| BrWRKY42-1 | Bra000793 | 1560 | 519 | 5 | A03: 13151695 - 13154162      | 0.0e+00  |
| BrWRKY42-2 | Bra029491 | 1479 | 492 | 6 | A09: 17616128 - 17618992      | 0.0e+00  |
| BrWRKY44-1 | Bra005210 | 1230 | 409 | 3 | A05: 4035604 - 4037093        | 1.0e-275 |
| BrWRKY44-2 | Bra001871 | 1263 | 420 | 3 | A03: 8742927 - 8744451        | 1.8e-282 |
| BrWRKY45   | Bra040557 | 435  | 144 | 1 | Scaffold000217: 68236 - 68758 | 1.4e-30  |
| BrWRKY46-1 | Bra004540 | 858  | 285 | 2 | A05: 715036 - 716110          | 4.0e-189 |
| BrWRKY46-2 | Bra000423 | 846  | 281 | 2 | A03: 11037238 - 11038263      | 1.3e-24  |
| BrWRKY46-3 | Bra014426 | 834  | 277 | 2 | A04: 570067 - 571085          | 4.7e-185 |
| BrWRKY47   | Bra036315 | 1473 | 490 | 5 | A09: 495154 - 498255          | 1.5e-26  |
| BrWRKY48-1 | Bra020628 | 1179 | 392 | 2 | A02: 24110310 - 24112266      | 2.3e-258 |
| BrWRKY48-2 | Bra036138 | 1062 | 353 | 2 | A09: 2551608 - 2553378        | 4.8e-232 |
| BrWRKY48-3 | Bra010032 | 1200 | 399 | 2 | A06: 18743149 - 18745198      | 3.4e-265 |
| BrWRKY49   | Bra027480 | 987  | 238 | 2 | A09: 13999956 - 14001207      | 4.0e-221 |
| BrWRKY50-1 | Bra020546 | 507  | 168 | 2 | A02: 24663990 - 24665001      | 1.2e-29  |
| BrWRKY50-2 | Bra036563 | 477  | 158 | 2 | A09: 1779667 - 1780630        | 1.4e-101 |
| BrWRKY50-3 | Bra009885 | 531  | 176 | 2 | A06: 17889671 - 17890550      | 9.2e-117 |
| BrWRKY51-1 | Bra031900 | 594  | 197 | 2 | A02: 27215815 - 27216988      | 2.5e-132 |
| BrWRKY51-2 | Bra024328 | 621  | 206 | 2 | A06: 15006857 - 15008072      | 5.4e-139 |
| BrWRKY51-3 | Bra037796 | 507  | 168 | 2 | A09: 3630921 - 3631940        | 6.1e-111 |
| BrWRKY53-1 | Bra013732 | 951  | 316 | 2 | A01: 7481180 - 7482306        | 5.9e-214 |
| BrWRKY53-2 | Bra019265 | 972  | 323 | 2 | A03: 25365665 - 25366833      | 2.1e-220 |
| BrWRKY54-1 | Bra016974 | 993  | 330 | 2 | A04: 17312303 - 17313823      | 5.3e-224 |
| BrWRKY54-2 | Bra000203 | 1023 | 340 | 2 | A03: 9851591 - 9853154        | 1.1e-231 |
| BrWRKY54-3 | Bra004586 | 1020 | 339 | 2 | A05: 898887 - 900534          | 2.0e-233 |
| BrWRKY54-4 | Bra008456 | 747  | 248 | 2 | A02: 15741116 - 15742088      | 9.3e-17  |
| BrWRKY54-5 | Bra008459 | 777  | 258 | 2 | A02: 15758758 - 15759687      | 1.0e-26  |
| BrWRKY55-1 | Bra016975 | 855  | 284 | 2 | A04: 17308786 - 17310419      | 1.8e-194 |
| BrWRKY55-2 | Bra000202 | 903  | 300 | 2 | A03: 9847657 - 9849612        | 1.7e-206 |
| BrWRKY55-3 | Bra014693 | 795  | 264 | 2 | A04: 2291755 - 2293716        | 2.8e-180 |
| BrWRKY56-1 | Bra027768 | 564  | 187 | 1 | A09: 6335477 - 6336522        | 1.4e-126 |
| BrWRKY56-2 | Bra027675 | 570  | 189 | 1 | A09: 6983636 - 6988361        | 2.4e-128 |
| BrWRKY57-1 | Bra004370 | 885  | 294 | 2 | A07: 18299620 - 18301569      | 9.1e-198 |
| BrWRKY57-2 | Bra004002 | 870  | 289 | 2 | A07: 16234546 - 16236403      | 4.3e-191 |

|                         |                   |      |      |    |                               |          |
|-------------------------|-------------------|------|------|----|-------------------------------|----------|
| BrWRKY57-3              | Bra038313         | 900  | 299  | 2  | A02: 11335646 - 11337496      | 4.1e-199 |
| BrWRKY58-1              | Bra039147         | 3249 | 1082 | 11 | A05: 23763093 - 23768561      | 4.3e-28  |
| BrWRKY58-2              | Bra001023         | 3195 | 1064 | 10 | A03: 14419206 - 14424267      | 5.3e-23  |
| BrWRKY59-1              | Bra031221         | 594  | 197  | 2  | A09: 31958040 - 31959294      | 6.7e-135 |
| BrWRKY59-2              | Bra030273         | 591  | 196  | 2  | A04: 9440773 - 9442655        | 1.2e-131 |
| BrWRKY60-1              | Bra019123         | 585  | 194  | 3  | A03: 26212225 - 26213388      | 3.1e-128 |
| BrWRKY60-2              | Bra023983         | 1038 | 345  | 4  | A03: 28445361 - 28447835      | 9.8e-228 |
| BrWRKY61-1              | Bra016535         | 1425 | 474  | 2  | A08: 18921284 - 18923182      | 1.9e-313 |
| BrWRKY61-2              | Bra031053         | 1413 | 470  | 2  | A09: 32729063 - 32730858      | 1.8e-198 |
| BrWRKY61-3              | Bra025693         | 864  | 287  | 1  | A06: 7337785 - 7338754        | 3.4e-186 |
| BrWRKY62-1              | Bra023211         | 777  | 258  | 2  | A09: 20688619 - 20689569      | 3.1e-173 |
| BrWRKY62-2              | Bra028918         | 873  | 290  | 2  | A02: 1398534 - 1399579        | 1.2e-312 |
| BrWRKY65-1              | Bra010839         | 786  | 261  | 1  | A08: 16731567 - 16732487      | 2.5e-174 |
| BrWRKY65-2              | Bra032300         | 789  | 262  | 1  | A09: 22733156 - 22734048      | 4.1e-175 |
| BrWRKY66                | Bra008454         | 597  | 198  | 3  | A02: 15731941 - 15732891      | 3.5e-25  |
| BrWRKY68                | Bra007674         | 897  | 298  | 2  | A09: 30354013 - 30355104      | 2.6e-204 |
| BrWRKY69-1              | Bra007413         | 813  | 270  | 2  | A09: 29067821 - 29069232      | 2.5e-182 |
| BrWRKY69-2              | Bra014556         | 837  | 278  | 2  | A04: 1434942 - 1436495        | 5.0e-188 |
| BrWRKY70-1              | Bra014692         | 858  | 285  | 2  | A04: 2286661 - 2287981        | 3.9e-197 |
| BrWRKY70-2              | Bra003239         | 852  | 283  | 2  | A07: 12088289 - 12089820      | 5.9e-192 |
| BrWRKY70-3              | Bra007243         | 831  | 276  | 2  | A09: 28166831 - 28168237      | 9.9e-188 |
| BrWRKY71-1              | Bra032340         | 822  | 273  | 2  | A09: 22427782 - 22428867      | 1.5e-183 |
| BrWRKY71-2              | Bra030178         | 834  | 277  | 2  | A07: 5904814 - 5906274        | 6.7e-192 |
| BrWRKY72-1              | Bra006283         | 1584 | 527  | 3  | A03: 2840808 - 2843014        | 0.0e+00  |
| BrWRKY72-2              | Bra008719         | 1656 | 551  | 3  | A10: 13554962 - 13557389      | 0.0e+00  |
| BrWRKY72-3              | Bra023505         | 1551 | 516  | 3  | A02: 3670275 - 3672453        | 2.6e-31  |
| BrWRKY72-4              | Bra040505         | 1608 | 535  | 3  | A01: 28592291 - 28594507      | 0.0e+00  |
| BrWRKY74-1              | Bra020617         | 1014 | 337  | 2  | A02: 24185557 - 24186711      | 5.3e-226 |
| BrWRKY74-2              | Bra010005         | 1026 | 341  | 2  | A06: 18593112 - 18594661      | 4.7e-233 |
| BrWRKY75-1              | Bra008858         | 444  | 147  | 1  | A10: 14163515 - 14164515      | 2.5e-94  |
| BrWRKY75-2              | Bra006178         | 444  | 147  | 1  | A03: 2366855 - 2367892        | 2.3e-94  |
| <i>Capsella rubella</i> |                   |      |      |    |                               |          |
| CrWRKY1                 | Carubv10013546m.g | 1470 | 489  | 4  | scaffold_3: 9903832 - 9908690 | 0.0e+00  |

|            |                   |      |      |   |                                 |          |
|------------|-------------------|------|------|---|---------------------------------|----------|
| CrWRKY2    | Carubv10026001m.g | 2076 | 691  | 4 | scaffold_8: 8879381 - 8883328   | 0.0e+00  |
| CrWRKY3    | Carubv10017039m.g | 1542 | 513  | 3 | scaffold_5: 963455 - 966061     | 1.5e-279 |
| CrWRKY4    | Carubv10008859m.g | 1566 | 521  | 3 | scaffold_1: 4857209 - 4860288   | 0.0e+00  |
| CrWRKY5    | Carubv10023987m.g | 699  | 232  | 3 | scaffold_4: 13666550 - 13668364 | 4.8e-158 |
| CrWRKY6    | Carubv10020051m.g | 1725 | 574  | 5 | scaffold_2: 1161926 - 1164495   | 0.0e+00  |
| CrWRKY7    | Carubv10005147m.g | 1059 | 352  | 2 | scaffold_7: 6264738 - 6266985   | 1.6e-233 |
| CrWRKY8    | Carubv10026746m.g | 1011 | 336  | 2 | scaffold_8: 597428 - 600123     | 2.6e-227 |
| CrWRKY9    | Carubv10021479m.g | 1050 | 349  | 4 | scaffold_2: 8918432 - 8919978   | 7.7e-232 |
| CrWRKY10   | Carubv10011619m.g | 1542 | 513  | 4 | scaffold_1: 19328797 - 19331203 | 0.0e+00  |
| CrWRKY11   | Carubv10005215m.g | 999  | 332  | 2 | scaffold_7: 3441010 - 3442782   | 6.7e-222 |
| CrWRKY13   | Carubv10005178m.g | 1032 | 343  | 2 | scaffold_7: 482554 - 485403     | 6.8e-233 |
| CrWRKY14   | Carubv10009191m.g | 1299 | 342  | 2 | scaffold_1: 10632445 - 10635121 | 9.8e-294 |
| CrWRKY15   | Carubv10023662m.g | 957  | 318  | 2 | scaffold_4: 1042867 - 1044448   | 1.2e-204 |
| CrWRKY16   | Carubv10025744m.g | 4083 | 1360 | 6 | scaffold_8: 1365382 - 1370221   | 0.0e+00  |
| CrWRKY17   | Carubv10023561m.g | 1032 | 343  | 2 | scaffold_4: 1807089 - 1808584   | 2.1e-229 |
| CrWRKY18   | Carubv10005349m.g | 909  | 302  | 4 | scaffold_7: 3347638 - 3349514   | 1.9e-198 |
| CrWRKY20-1 | Carubv10004390m.g | 1848 | 615  | 6 | scaffold_7: 5347702 - 5352521   | 0.0e+00  |
| CrWRKY20-2 | Carubv10027981m.g | 1689 | 562  | 5 | scaffold_8: 8634914 - 8637711   | 0.0e+00  |
| CrWRKY21   | Carubv10023424m.g | 1146 | 381  | 2 | scaffold_4: 7740465 - 7742613   | 2.3e-255 |
| CrWRKY22   | Carubv10001446m.g | 981  | 326  | 2 | scaffold_6: 16254206 - 16255961 | 4.1e-217 |
| CrWRKY23   | Carubv10023565m.g | 1026 | 341  | 2 | scaffold_4: 14745207 - 14746811 | 9.1e-230 |
| CrWRKY24   | Carubv10006263m.g | 549  | 182  | 1 | scaffold_7: 15476709 - 15477672 | 2.3e-122 |
| CrWRKY25   | Carubv10024687m.g | 1173 | 390  | 4 | scaffold_4: 7590469 - 7592097   | 5.0e-264 |
| CrWRKY27   | Carubv10026599m.g | 1134 | 377  | 2 | scaffold_8: 7489184 - 7490847   | 1.9e-256 |
| CrWRKY28   | Carubv10005249m.g | 972  | 323  | 2 | scaffold_7: 8751223 - 8753033   | 3.5e-217 |
| CrWRKY29   | Carubv10005155m.g | 1056 | 351  | 4 | scaffold_7: 6646263 - 6648310   | 7.4e-237 |
| CrWRKY30   | Carubv10001559m.g | 915  | 304  | 2 | scaffold_6: 8176565 - 8178023   | 4.0e-209 |
| CrWRKY31   | Carubv10004543m.g | 1623 | 540  | 6 | scaffold_7: 7218079 - 7222785   | 0.0e+00  |
| CrWRKY32   | Carubv10006890m.g | 1509 | 502  | 4 | scaffold_7: 3674663 - 3676878   | 0.0e+00  |
| CrWRKY33   | Carubv10023006m.g | 1569 | 522  | 4 | scaffold_4: 11167415 - 11170428 | 0.0e+00  |
| CrWRKY34   | Carubv10007808m.g | 1587 | 528  | 3 | scaffold_7: 5432917 - 5434780   | 0.0e+00  |
| CrWRKY35   | Carubv10023228m.g | 1323 | 440  | 2 | scaffold_4: 9617920 - 9620757   | 1.1e-294 |
| CrWRKY36   | Carubv10022409m.g | 1164 | 387  | 3 | scaffold_2: 9732847 - 9734811   | 2.9e-256 |

|            |                   |      |      |   |                                 |          |
|------------|-------------------|------|------|---|---------------------------------|----------|
| CrWRKY38   | Carubv10002472m.g | 873  | 290  | 2 | scaffold_6: 7524053 - 7525258   | 2.2e-197 |
| CrWRKY39   | Carubv10015434m.g | 993  | 330  | 2 | scaffold_3: 1270000 - 1271182   | 2.3e-223 |
| CrWRKY40   | Carubv10020726m.g | 891  | 296  | 5 | scaffold_2: 13713965 - 13717378 | 1.9e-148 |
| CrWRKY41   | Carubv10001458m.g | 972  | 323  | 2 | scaffold_6: 13541328 - 13543386 | 2.7e-222 |
| CrWRKY42   | Carubv10000703m.g | 1578 | 525  | 5 | scaffold_6: 14602467 - 14605216 | 0.0e+00  |
| CrWRKY44   | Carubv10023273m.g | 1281 | 426  | 4 | scaffold_4: 10666173 - 10668542 | 1.3e-287 |
| CrWRKY45   | Carubv10016335m.g | 450  | 149  | 1 | scaffold_3: 40481 - 41037       | 6.0e-101 |
| CrWRKY46-1 | Carubv10023578m.g | 1011 | 336  | 2 | scaffold_4: 14349812 - 14351193 | 1.9e-220 |
| CrWRKY46-2 | Carubv10019489m.g | 876  | 291  | 2 | scaffold_5: 13062694 - 13063784 | 8.7e-192 |
| CrWRKY47   | Carubv10000809m.g | 1482 | 493  | 5 | scaffold_6: 15929489 - 15932717 | 0.0e+00  |
| CrWRKY48   | Carubv10026463m.g | 1275 | 424  | 2 | scaffold_8: 5969032 - 5971300   | 4.7e-281 |
| CrWRKY49   | Carubv10026841m.g | 918  | 305  | 2 | scaffold_8: 2385348 - 2386532   | 1.1e-207 |
| CrWRKY50   | Carubv10002099m.g | 522  | 173  | 2 | scaffold_6: 9111908 - 9113611   | 5.1e-112 |
| CrWRKY51   | Carubv10027178m.g | 585  | 194  | 2 | scaffold_8: 12283805 - 12285414 | 5.5e-129 |
| CrWRKY52   | Carubv10025742m.g | 4236 | 1411 | 6 | scaffold_8: 1163667 - 1169265   | 0.0e+00  |
| CrWRKY53   | Carubv10006884m.g | 957  | 318  | 1 | scaffold_7: 6460067 - 6461117   | 2.8e-217 |
| CrWRKY54   | Carubv10024972m.g | 885  | 294  | 3 | scaffold_4: 12141619 - 12143180 | 3.6e-200 |
| CrWRKY55-1 | Carubv10023773m.g | 870  | 289  | 2 | scaffold_4: 12137702 - 12140014 | 3.0e-194 |
| CrWRKY55-2 | Carubv10017859m.g | 786  | 261  | 2 | scaffold_5: 11149025 - 11150970 | 5.5e-180 |
| CrWRKY56   | Carubv10022129m.g | 585  | 194  | 1 | scaffold_2: 345364 - 346538     | 2.5e-131 |
| CrWRKY57   | Carubv10020765m.g | 840  | 279  | 2 | scaffold_2: 9464403 - 9466127   | 1.8e-187 |
| CrWRKY58   | Carubv10013623m.g | 1410 | 469  | 3 | scaffold_3: 344558 - 346942     | 0.0e+00  |
| CrWRKY59   | Carubv10025063m.g | 603  | 200  | 2 | scaffold_4: 332760 - 334591     | 8.5e-138 |
| CrWRKY60   | Carubv10023876m.g | 783  | 260  | 4 | scaffold_4: 2080266 - 2082230   | 1.4e-172 |
| CrWRKY62   | Carubv10012720m.g | 795  | 264  | 1 | scaffold_24: 38651 - 39611      | 1.4e-178 |
| CrWRKY61   | Carubv10008977m.g | 1464 | 487  | 2 | scaffold_1: 6548436 - 6550262   | 0.0e+00  |
| CrWRKY63   | Carubv10022120m.g | 663  | 220  | 2 | scaffold_2: 3955705 - 3956684   | 1.2e-149 |
| CrWRKY64   | Carubv10021899m.g | 744  | 247  | 2 | scaffold_2: 8006794 - 8007750   | 7.4e-172 |
| CrWRKY65   | Carubv10010013m.g | 810  | 269  | 1 | scaffold_1: 10003548 - 10004843 | 7.0e-179 |
| CrWRKY66   | Carubv10021420m.g | 693  | 230  | 2 | scaffold_2: 8019137 - 8020072   | 6.1e-157 |
| CrWRKY67   | Carubv10021860m.g | 684  | 227  | 2 | scaffold_2: 8011455 - 8012388   | 2.2e-158 |
| CrWRKY68   | Carubv10019242m.g | 879  | 292  | 2 | scaffold_5: 13334589 - 13335750 | 1.3e-198 |
| CrWRKY69   | Carubv10017819m.g | 825  | 274  | 2 | scaffold_5: 12001127 - 12003911 | 1.8e-184 |



|                      |                            |      |     |   |                                   |          |
|----------------------|----------------------------|------|-----|---|-----------------------------------|----------|
| CrWRKY70             | Carubv10017349m.g          | 1239 | 412 | 2 | scaffold_5: 11152805 - 11154527   | 1.5e-279 |
| CrWRKY71             | Carubv10009934m.g          | 858  | 285 | 2 | scaffold_1: 10242856 - 10244159   | 9.3e-194 |
| CrWRKY72             | Carubv10000606m.g          | 1677 | 558 | 3 | scaffold_6: 4949529 - 4952204     | 0.0e+00  |
| CrWRKY74             | Carubv10001454m.g          | 975  | 324 | 2 | scaffold_6: 10413373 - 10414784   | 1.4e-215 |
| CrWRKY75             | Carubv10002187m.g          | 459  | 152 | 1 | scaffold_6: 4149186 - 4150378     | 6.5e-100 |
| <i>Carica papaya</i> |                            |      |     |   |                                   |          |
| CpWRKY1              | evm.TU.supercontig_136.16  | 1167 | 388 | 3 | supercontig_136: 206315 - 207886  | 7.5e-125 |
| CpWRKY2              | evm.TU.supercontig_12.58   | 2244 | 747 | 4 | supercontig_12: 485616 - 488901   | 0.0e+00  |
| CpWRKY3              | evm.TU.supercontig_14.134  | 294  | 97  | 0 | supercontig_14: 1611277 - 1611570 | 2.4e-54  |
| CpWRKY5              | evm.TU.supercontig_22.34   | 578  | 193 | 3 | supercontig_22: 818084 - 820697   | 1.9e-82  |
| CpWRKY6-1            | evm.TU.supercontig_152.36  | 1899 | 632 | 4 | supercontig_152: 269384 - 272002  | 2.6e-209 |
| CpWRKY6-2            | evm.TU.supercontig_87.103  | 1857 | 618 | 4 | supercontig_87: 670547 - 672817   | 1.6e-240 |
| CpWRKY7              | evm.TU.supercontig_21.159  | 1131 | 376 | 2 | supercontig_21: 1622493 - 1624174 | 1.8e-161 |
| CpWRKY11             | evm.TU.supercontig_768.1   | 1017 | 338 | 2 | supercontig_768: 2106 - 3934      | 1.3e-168 |
| CpWRKY12             | evm.TU.supercontig_2.29    | 1128 | 375 | 3 | supercontig_2: 580656 - 582323    | 3.2e-60  |
| CpWRKY13             | evm.TU.supercontig_72.18   | 648  | 215 | 2 | supercontig_72: 405689 - 412913   | 1.7e-80  |
| CpWRKY15             | evm.TU.supercontig_55.104  | 1092 | 363 | 2 | supercontig_55: 632234 - 633633   | 1.7e-147 |
| CpWRKY18             | evm.TU.supercontig_127.25  | 1065 | 354 | 2 | supercontig_127: 422032 - 423346  | 9.3e-88  |
| CpWRKY20             | evm.TU.supercontig_12.196  | 1269 | 422 | 5 | supercontig_12: 1751070 - 1756934 | 1.2e-185 |
| CpWRKY22             | evm.TU.supercontig_184.33  | 897  | 298 | 2 | supercontig_184: 394065 - 395369  | 7.2e-84  |
| CpWRKY23             | evm.TU.supercontig_18.82   | 966  | 321 | 2 | supercontig_18: 548927 - 550235   | 4.4e-108 |
| CpWRKY27             | evm.TU.supercontig_107.128 | 1176 | 391 | 2 | supercontig_107: 687517 - 688860  | 3.6e-71  |
| CpWRKY29             | evm.TU.supercontig_180.9   | 966  | 321 | 2 | supercontig_180: 123327 - 124517  | 7.2e-75  |
| CpWRKY32             | evm.TU.supercontig_46.151  | 990  | 329 | 2 | supercontig_46: 1518234 - 1522477 | 3.1e-109 |
| CpWRKY33-1           | evm.TU.supercontig_5.248   | 1749 | 582 | 4 | supercontig_5: 2162660 - 2165047  | 3.5e-235 |
| CpWRKY33-2           | evm.TU.supercontig_2.345   | 1830 | 609 | 4 | supercontig_2: 4002808 - 4005630  | 2.5e-272 |
| CpWRKY35-1           | evm.TU.supercontig_18.56   | 807  | 268 | 2 | supercontig_18: 399883 - 401123   | 2.9e-85  |
| CpWRKY35-2           | evm.TU.supercontig_2011.1  | 1411 | 471 | 2 | supercontig_2011: 7464 - 10808    | 2.9e-113 |
| CpWRKY38             | evm.TU.supercontig_86.65   | 534  | 177 | 2 | supercontig_86: 834868 - 835555   | 2.2e-42  |
| CpWRKY39             | evm.TU.supercontig_52.143  | 1050 | 349 | 2 | supercontig_52: 1335130 - 1337065 | 2.1e-184 |
| CpWRKY40-1           | evm.TU.supercontig_10.75   | 921  | 306 | 4 | supercontig_10: 1268958 - 1271020 | 6.2e-75  |
| CpWRKY40-2           | evm.TU.supercontig_127.27  | 882  | 293 | 3 | supercontig_127: 458779 - 460471  | 2.9e-67  |
| CpWRKY42             | evm.TU.supercontig_684.1   | 1605 | 534 | 5 | supercontig_684: 5486 - 8518      | 1.0e-124 |

|                                  |                           |      |     |    |                                   |          |
|----------------------------------|---------------------------|------|-----|----|-----------------------------------|----------|
| CpWRKY44                         | evm.TU.supercontig_114.62 | 1395 | 464 | 4  | supercontig_114: 806190 - 808122  | 6.6e-203 |
| CpWRKY46                         | evm.TU.contig_32256       | 1062 | 353 | 2  | contig_32256: 706 - 2593          | 4.1e-121 |
| CpWRKY47                         | evm.TU.supercontig_57.21  | 1473 | 490 | 5  | supercontig_57: 356699 - 359700   | 8.1e-191 |
| CpWRKY48                         | evm.TU.supercontig_9.36   | 1182 | 393 | 2  | supercontig_9: 151328 - 152907    | 1.9e-102 |
| CpWRKY49                         | evm.TU.supercontig_169.18 | 381  | 126 | 1  | supercontig_169: 259526 - 260026  | 8.0e-28  |
| CpWRKY50                         | evm.TU.supercontig_126.49 | 540  | 179 | 2  | supercontig_126: 512086 - 514000  | 6.7e-51  |
| CpWRKY51                         | evm.TU.supercontig_919.2  | 432  | 143 | 2  | supercontig_919: 20754 - 22643    | 7.8e-52  |
| CpWRKY53-1                       | evm.TU.supercontig_3.53   | 1125 | 374 | 2  | supercontig_3: 312632 - 314116    | 1.8e-115 |
| CpWRKY53-2                       | evm.TU.supercontig_79.60  | 1053 | 350 | 2  | supercontig_79: 1185551 - 1186820 | 1.2e-134 |
| CpWRKY56-1                       | evm.TU.supercontig_11.70  | 483  | 160 | 1  | supercontig_11: 730462 - 731171   | 8.2e-46  |
| CpWRKY56-2                       | evm.TU.supercontig_180.6  | 348  | 115 | 0  | supercontig_180: 105515 - 105862  | 2.4e-24  |
| CpWRKY55                         | evm.TU.supercontig_19.45  | 999  | 332 | 2  | supercontig_19: 376137 - 377338   | 3.2e-79  |
| CpWRKY57                         | evm.TU.supercontig_1.104  | 942  | 313 | 2  | supercontig_1: 1701963 - 1705388  | 2.4e-122 |
| CpWRKY58                         | evm.TU.supercontig_1.76   | 1626 | 541 | 3  | supercontig_1: 1377429 - 1381442  | 5.8e-216 |
| CpWRKY67                         | evm.TU.supercontig_86.64  | 786  | 261 | 2  | supercontig_86: 829391 - 831277   | 5.1e-59  |
| CpWRKY69                         | evm.TU.supercontig_7.92   | 786  | 261 | 2  | supercontig_7: 828842 - 829924    | 7.4e-110 |
| CpWRKY71                         | evm.TU.supercontig_1195.2 | 357  | 118 | 0  | supercontig_1195: 13615 - 13971   | 1.3e-37  |
| CpWRKY70                         | evm.TU.supercontig_19.44  | 861  | 286 | 2  | supercontig_19: 374219 - 375477   | 6.8e-75  |
| CpWRKY72-1                       | evm.TU.supercontig_14.32  | 1809 | 602 | 4  | supercontig_14: 357594 - 359995   | 6.6e-186 |
| CpWRKY72-2                       | evm.TU.supercontig_17.220 | 1812 | 603 | 5  | supercontig_17: 2581193 - 2584970 | 2.0e-201 |
| CpWRKY74                         | evm.TU.supercontig_1244.3 | 1074 | 357 | 2  | supercontig_1244: 9823 - 12104    | 5.7e-173 |
| CpWRKY75-1                       | evm.TU.supercontig_43.86  | 552  | 183 | 1  | supercontig_43: 1118553 - 1120033 | 7.5e-60  |
| CpWRKY75-2                       | evm.TU.supercontig_807.4  | 561  | 186 | 1  | supercontig_807: 19181 - 20131    | 1.1e-54  |
| <i>Chlamydomonas reinhardtii</i> |                           |      |     |    |                                   |          |
| CreinWRKY26                      | Cre04.g228400             | 1920 | 639 | 10 | chromosome_4: 3560165 - 3564466   | 0.0e+00  |
| <i>Citrus clementina</i>         |                           |      |     |    |                                   |          |
| CcWRKY1                          | Ciclev10015049m.g         | 1467 | 488 | 4  | scaffold_2: 23826323 - 23829613   | 0.0e+00  |
| CcWRKY4                          | Ciclev10031225m.g         | 1578 | 525 | 3  | scaffold_4: 24231402 - 24235138   | 0.0e+00  |
| CcWRKY5                          | Ciclev10023956m.g         | 726  | 241 | 3  | scaffold_3: 50663970 - 50666133   | 3.6e-164 |
| CcWRKY6                          | Ciclev10014642m.g         | 1824 | 607 | 5  | scaffold_2: 35513796 - 35516719   | 0.0e+00  |
| CcWRKY7-1                        | Ciclev10001636m.g         | 1074 | 357 | 2  | scaffold_5: 39928705 - 39930585   | 2.7e-238 |
| CcWRKY7-2                        | Ciclev10025925m.g         | 1092 | 363 | 2  | scaffold_7: 3541924 - 3543863     | 4.6e-240 |
| CcWRKY9                          | Ciclev10030455m.g         | 1185 | 394 | 4  | scaffold_659: 2206 - 4049         | 2.3e-260 |

|            |                   |      |     |   |                                 |          |
|------------|-------------------|------|-----|---|---------------------------------|----------|
| CcWRKY11   | Ciclev10008836m.g | 1029 | 342 | 2 | scaffold_1: 526813 - 529150     | 2.2e-227 |
| CcWRKY14   | Ciclev10014984m.g | 1506 | 501 | 2 | scaffold_2: 30971742 - 30974734 | 0.0e+00  |
| CcWRKY16   | Ciclev10021624m.g | 825  | 274 | 2 | scaffold_3: 46498627 - 46500232 | 1.1e-168 |
| CcWRKY18   | Ciclev10026105m.g | 957  | 318 | 4 | scaffold_7: 14560604 - 14562711 | 7.2e-209 |
| CcWRKY20   | Ciclev10007882m.g | 1692 | 563 | 5 | scaffold_1: 23073033 - 23077659 | 0.0e+00  |
| CcWRKY21   | Ciclev10020867m.g | 1059 | 352 | 2 | scaffold_3: 43758957 - 43761623 | 8.1e-235 |
| CcWRKY22   | Ciclev10020943m.g | 1041 | 346 | 2 | scaffold_3: 48640071 - 48641944 | 1.7e-226 |
| CcWRKY23   | Ciclev10021174m.g | 969  | 322 | 2 | scaffold_3: 46685981 - 46687931 | 6.1e-216 |
| CcWRKY26   | Ciclev10000654m.g | 1785 | 594 | 4 | scaffold_5: 12677414 - 12680761 | 0.0e+00  |
| CcWRKY27   | Ciclev10005095m.g | 1212 | 403 | 2 | scaffold_9: 29596219 - 29597957 | 7.1e-272 |
| CcWRKY29   | Ciclev10024061m.g | 948  | 315 | 2 | scaffold_3: 1452876 - 1454058   | 1.3e-214 |
| CcWRKY30   | Ciclev10020744m.g | 1095 | 364 | 2 | scaffold_3: 48321396 - 48324697 | 5.4e-248 |
| CcWRKY31-1 | Ciclev10007917m.g | 1644 | 547 | 5 | scaffold_1: 22651299 - 22653980 | 0.0e+00  |
| CcWRKY31-2 | Ciclev10014665m.g | 1800 | 599 | 4 | scaffold_2: 22459166 - 22461667 | 0.0e+00  |
| CcWRKY32   | Ciclev10008135m.g | 1458 | 485 | 4 | scaffold_1: 28433972 - 28437921 | 0.0e+00  |
| CcWRKY33   | Ciclev10011386m.g | 1701 | 566 | 4 | scaffold_6: 17113588 - 17116563 | 0.0e+00  |
| CcWRKY34   | Ciclev10007904m.g | 1662 | 553 | 4 | scaffold_1: 24328901 - 24333161 | 0.0e+00  |
| CcWRKY36   | Ciclev10031162m.g | 1632 | 543 | 3 | scaffold_4: 23602551 - 23606799 | 0.0e+00  |
| CcWRKY39   | Ciclev10028715m.g | 1080 | 359 | 2 | scaffold_8: 17468874 - 17471267 | 3.1e-242 |
| CcWRKY40-1 | Ciclev10009250m.g | 777  | 258 | 3 | scaffold_1: 1041086 - 1043376   | 5.4e-174 |
| CcWRKY40-2 | Ciclev10008930m.g | 966  | 321 | 4 | scaffold_1: 1051155 - 1052947   | 1.1e-212 |
| CcWRKY41   | Ciclev10005165m.g | 1146 | 381 | 2 | scaffold_9: 30033675 - 30035553 | 1.9e-259 |
| CcWRKY43   | Ciclev10024257m.g | 567  | 188 | 1 | scaffold_3: 48618880 - 48620746 | 7.0e-127 |
| CcWRKY44   | Ciclev10011660m.g | 1407 | 468 | 5 | scaffold_6: 11954097 - 11958888 | 0.0e+00  |
| CcWRKY45   | Ciclev10032943m.g | 489  | 162 | 1 | scaffold_4: 12596113 - 12597155 | 6.7e-106 |
| CcWRKY47-2 | Ciclev10006728m.g | 417  | 138 | 3 | scaffold_9: 81344 - 82445       | 5.6e-91  |
| CcWRKY47-1 | Ciclev10019820m.g | 1506 | 501 | 5 | scaffold_3: 47121093 - 47124518 | 0.0e+00  |
| CcWRKY48   | Ciclev10005203m.g | 1119 | 372 | 2 | scaffold_9: 700795 - 702522     | 2.6e-250 |
| CcWRKY49   | Ciclev10013616m.g | 912  | 303 | 2 | scaffold_6: 14334820 - 14336151 | 4.1e-202 |
| CcWRKY50   | Ciclev10026733m.g | 417  | 138 | 2 | scaffold_7: 18561339 - 18565286 | 5.9e-90  |
| CcWRKY51   | Ciclev10009761m.g | 480  | 159 | 2 | scaffold_1: 25604509 - 25605857 | 4.0e-106 |
| CcWRKY53   | Ciclev10021038m.g | 1011 | 336 | 2 | scaffold_3: 1054257 - 1056078   | 4.9e-227 |
| CcWRKY54   | Ciclev10012055m.g | 1071 | 356 | 2 | scaffold_6: 17675267 - 17676898 | 1.7e-238 |

|                        |                     |      |     |    |                                  |          |
|------------------------|---------------------|------|-----|----|----------------------------------|----------|
| CcWRKY55               | Ciclev10033384m.g   | 1071 | 356 | 2  | scaffold_4: 2328696 - 2330790    | 4.0e-241 |
| CcWRKY57-1             | Ciclev10032285m.g   | 876  | 291 | 3  | scaffold_4: 24341642 - 24346954  | 4.1e-198 |
| CcWRKY57-2             | Ciclev10017173m.g   | 384  | 127 | 2  | scaffold_2: 220534 - 222401      | 2.6e-84  |
| CcWRKY58               | Ciclev10013781m.g   | 2751 | 916 | 10 | scaffold_6: 25306829 - 25315243  | 0.0e+00  |
| CcWRKY65               | Ciclev10016229m.g   | 825  | 274 | 2  | scaffold_2: 34412152 - 34415059  | 8.4e-187 |
| CcWRKY70               | Ciclev10032192m.g   | 930  | 309 | 2  | scaffold_4: 2333547 - 2335111    | 3.9e-208 |
| CcWRKY71-1             | Ciclev10032012m.g   | 1029 | 342 | 2  | scaffold_4: 16046322 - 16048971  | 8.3e-232 |
| CcWRKY71-2             | Ciclev10018230m.g   | 951  | 316 | 3  | scaffold_2: 34859930 - 34862118  | 1.0e-213 |
| CcWRKY72-1             | Ciclev10011501m.g   | 1551 | 516 | 4  | scaffold_6: 24662454 - 24665352  | 0.0e+00  |
| CcWRKY72-2             | Ciclev10019383m.g   | 1809 | 602 | 4  | scaffold_3: 2226805 - 2230144    | 0.0e+00  |
| CcWRKY75-1             | Ciclev10017531m.g   | 552  | 183 | 1  | scaffold_2: 13341557 - 13343067  | 6.1e-124 |
| CcWRKY75-2             | Ciclev10032816m.g   | 585  | 194 | 1  | scaffold_4: 20998708 - 21001535  | 9.7e-129 |
| <i>Citrus sinensis</i> |                     |      |     |    |                                  |          |
| CsWRKY1                | orange1.1g011340m.g | 1467 | 488 | 4  | scaffold00077: 307046 - 310334   | 0.0e+00  |
| CsWRKY2                | orange1.1g004963m.g | 2166 | 721 | 5  | scaffold00013: 1838851 - 1843181 | 0.0e+00  |
| CsWRKY4-1              | orange1.1g009051m.g | 1638 | 545 | 4  | scaffold00003: 3348929 - 3352620 | 0.0e+00  |
| CsWRKY4-2              | orange1.1g010802m.g | 1506 | 501 | 3  | scaffold00015: 1591146 - 1594814 | 0.0e+00  |
| CsWRKY5                | orange1.1g026216m.g | 726  | 241 | 3  | scaffold00001: 354623 - 357157   | 3.6e-164 |
| CsWRKY6                | orange1.1g007099m.g | 1857 | 618 | 6  | scaffold00007: 1958471 - 1961762 | 0.0e+00  |
| CsWRKY7-1              | orange1.1g018215m.g | 1080 | 359 | 2  | scaffold00002: 1863592 - 1865359 | 2.0e-239 |
| CsWRKY7-2              | orange1.1g017930m.g | 1092 | 363 | 2  | scaffold00006: 1346375 - 1348315 | 4.6e-240 |
| CsWRKY9                | orange1.1g036819m.g | 807  | 269 | 4  | scaffold00568: 96439 - 97905     | 3.0e-173 |
| CsWRKY10-1             | orange1.1g040283m.g | 402  | 134 | 0  | scaffold00162: 293448 - 293849   | 9.2e-88  |
| CsWRKY10-2             | orange1.1g032690m.g | 408  | 135 | 2  | scaffold00123: 233020 - 234931   | 3.3e-90  |
| CsWRKY13               | orange1.1g026950m.g | 693  | 230 | 2  | scaffold01166: 10456 - 13713     | 4.6e-155 |
| CsWRKY14               | orange1.1g012605m.g | 1383 | 460 | 2  | scaffold00008: 2345601 - 2348134 | 3.3e-307 |
| CsWRKY17               | orange1.1g019404m.g | 1026 | 341 | 2  | scaffold00025: 483188 - 485204   | 6.7e-227 |
| CsWRKY19               | orange1.1g014629m.g | 1266 | 421 | 3  | scaffold00172: 174342 - 178393   | 3.0e-286 |
| CsWRKY20               | orange1.1g008458m.g | 1695 | 564 | 5  | scaffold00049: 532438 - 537337   | 0.0e+00  |
| CsWRKY21               | orange1.1g018659m.g | 1059 | 352 | 3  | scaffold00022: 289543 - 292094   | 3.9e-235 |
| CsWRKY22               | orange1.1g019126m.g | 1041 | 346 | 2  | scaffold00001: 2333743 - 2335147 | 3.1e-226 |
| CsWRKY23               | orange1.1g020713m.g | 969  | 322 | 2  | scaffold00001: 4236944 - 4238415 | 1.2e-215 |
| CsWRKY27               | orange1.1g015616m.g | 1212 | 403 | 2  | scaffold00097: 230834 - 232265   | 9.1e-272 |

|            |                     |      |     |   |                                  |          |
|------------|---------------------|------|-----|---|----------------------------------|----------|
| CsWRKY29   | orange1.1g021896m.g | 921  | 306 | 2 | scaffold00009: 1025605 - 1026760 | 3.9e-207 |
| CsWRKY31   | orange1.1g007546m.g | 1800 | 599 | 4 | scaffold00121: 389458 - 391889   | 0.0e+00  |
| CsWRKY32   | orange1.1g036653m.g | 1464 | 487 | 4 | scaffold00068: 482854 - 486663   | 8.9e-313 |
| CsWRKY33-1 | orange1.1g013222m.g | 1344 | 447 | 4 | scaffold00042: 689265 - 692549   | 7.0e-303 |
| CsWRKY33-2 | orange1.1g011483m.g | 1455 | 484 | 3 | scaffold00626: 42818 - 45853     | 0.0e+00  |
| CsWRKY35   | orange1.1g023982m.g | 825  | 274 | 2 | scaffold00001: 4402815 - 4404405 | 4.7e-184 |
| CsWRKY40-1 | orange1.1g020831m.g | 966  | 321 | 4 | scaffold00025: 1006589 - 1008372 | 1.1e-212 |
| CsWRKY40-2 | orange1.1g025097m.g | 777  | 258 | 3 | scaffold00025: 996904 - 999151   | 1.1e-173 |
| CsWRKY41-1 | orange1.1g019737m.g | 1011 | 336 | 2 | scaffold00009: 1409048 - 1410893 | 2.7e-227 |
| CsWRKY41-2 | orange1.1g045032m.g | 1065 | 354 | 2 | scaffold00104: 283550 - 285259   | 1.1e-237 |
| CsWRKY42   | orange1.1g008964m.g | 1644 | 547 | 5 | scaffold00049: 126215 - 128926   | 0.0e+00  |
| CsWRKY43   | orange1.1g046286m.g | 567  | 188 | 1 | scaffold00001: 2355401 - 2357338 | 1.6e-127 |
| CsWRKY45   | orange1.1g031298m.g | 489  | 162 | 1 | scaffold00035: 211943 - 212982   | 7.3e-106 |
| CsWRKY46   | orange1.1g017895m.g | 1095 | 364 | 2 | scaffold00001: 2647888 - 2651028 | 2.1e-248 |
| CsWRKY47   | orange1.1g040711m.g | 1506 | 501 | 5 | scaffold00001: 3810277 - 3813167 | 0.0e+00  |
| CsWRKY48   | orange1.1g017479m.g | 1116 | 371 | 2 | scaffold00016: 1122184 - 1123697 | 1.2e-249 |
| CsWRKY49-1 | orange1.1g038951m.g | 912  | 303 | 2 | scaffold00189: 257377 - 258688   | 9.9e-203 |
| CsWRKY49-2 | orange1.1g031482m.g | 480  | 159 | 2 | scaffold00013: 646034 - 647324   | 4.0e-106 |
| CsWRKY51   | orange1.1g029257m.g | 591  | 196 | 3 | scaffold00362: 80427 - 84896     | 2.6e-80  |
| CsWRKY54   | orange1.1g021598m.g | 933  | 310 | 2 | scaffold00024: 87173 - 88697     | 8.6e-209 |
| CsWRKY55-1 | orange1.1g018407m.g | 1071 | 356 | 2 | scaffold00024: 82311 - 84401     | 6.9e-241 |
| CsWRKY55-2 | orange1.1g041468m.g | 375  | 124 | 2 | scaffold00037: 611554 - 612440   | 5.7e-80  |
| CsWRKY57   | orange1.1g045509m.g | 876  | 291 | 2 | scaffold00003: 3456550 - 3459372 | 3.7e-198 |
| CsWRKY65   | orange1.1g022353m.g | 897  | 298 | 3 | scaffold00007: 901284 - 905441   | 6.9e-205 |
| CsWRKY71-1 | orange1.1g021142m.g | 954  | 317 | 2 | scaffold00007: 1347875 - 1349215 | 9.4e-214 |
| CsWRKY71-2 | orange1.1g019375m.g | 1029 | 342 | 2 | scaffold00057: 464133 - 466331   | 7.6e-232 |
| CsWRKY72-1 | orange1.1g010903m.g | 1497 | 498 | 2 | scaffold00003: 2727603 - 2730035 | 0.0e+00  |
| CsWRKY72-2 | orange1.1g009794m.g | 1578 | 525 | 2 | scaffold00009: 279247 - 281128   | 0.0e+00  |
| CsWRKY72-3 | orange1.1g045987m.g | 1533 | 510 | 3 | scaffold00015: 942103 - 943915   | 0.0e+00  |
| CsWRKY70   | orange1.1g020291m.g | 987  | 328 | 2 | scaffold00036: 115494 - 117084   | 1.6e-218 |
| CsWRKY74   | orange1.1g018255m.g | 1080 | 359 | 2 | scaffold00124: 381097 - 383496   | 5.6e-242 |
| CsWRKY75-2 | orange1.1g043122m.g | 321  | 106 | 1 | scaffold00003: 164635 - 166589   | 6.2e-69  |
| CsWRKY75-1 | orange1.1g030050m.g | 552  | 183 | 2 | scaffold00038: 626400 - 630108   | 5.8e-124 |

| <i>Coccomyxa subellipsoidea</i> |              |      |     |   |                                  |          |
|---------------------------------|--------------|------|-----|---|----------------------------------|----------|
| CsubWRKY26                      | gw1.1.725.1  | 513  | 171 | 4 | scaffold_1: 2028937 - 2030784    | 2.0e-113 |
| <i>Cucumis sativus</i>          |              |      |     |   |                                  |          |
| CsaWRKY1                        | Cucsa.100440 | 1302 | 433 | 6 | scaffold00926: 914397 - 918705   | 3.5e-286 |
| CsaWRKY2-1                      | Cucsa.041700 | 2259 | 752 | 6 | scaffold00540: 270292 - 275266   | 0.0e+00  |
| CsaWRKY2-2                      | Cucsa.356720 | 1584 | 527 | 4 | scaffold03577: 1574124 - 1581251 | 0.0e+00  |
| CsaWRKY3-1                      | Cucsa.158040 | 1521 | 506 | 3 | scaffold01142: 195925 - 200710   | 0.0e+00  |
| CsaWRKY3-2                      | Cucsa.284730 | 1479 | 492 | 3 | scaffold02653: 1369003 - 1372205 | 0.0e+00  |
| CsaWRKY9                        | Cucsa.049620 | 1245 | 414 | 4 | scaffold00550: 97472 - 100733    | 1.8e-280 |
| CsaWRKY11-1                     | Cucsa.282040 | 849  | 282 | 2 | scaffold02641: 173928 - 175382   | 4.9e-191 |
| CsaWRKY11-2                     | Cucsa.311060 | 1053 | 350 | 2 | scaffold02995: 721845 - 723766   | 4.4e-231 |
| CsaWRKY13-1                     | Cucsa.101460 | 735  | 244 | 2 | scaffold00927: 712502 - 715002   | 1.6e-167 |
| CsaWRKY13-2                     | Cucsa.250310 | 741  | 246 | 3 | scaffold02219: 466299 - 468905   | 1.4e-165 |
| CsaWRKY13                       | Cucsa.260060 | 660  | 219 | 3 | scaffold02229: 6346998 - 6349594 | 2.8e-152 |
| CsaWRKY14                       | Cucsa.048520 | 1548 | 515 | 2 | scaffold00542: 3200793 - 3203774 | 0.0e+00  |
| CsaWRKY15-1                     | Cucsa.352410 | 1179 | 392 | 2 | scaffold03533: 261807 - 263639   | 2.6e-249 |
| CsaWRKY15-2                     | Cucsa.073190 | 885  | 294 | 2 | scaffold00765: 793624 - 795654   | 2.6e-188 |
| CsaWRKY15-3                     | Cucsa.102600 | 885  | 294 | 2 | scaffold00927: 1610330 - 1611544 | 1.5e-192 |
| CsaWRKY20                       | Cucsa.042320 | 1602 | 533 | 5 | scaffold00540: 759912 - 770172   | 0.0e+00  |
| CsaWRKY21-1                     | Cucsa.388650 | 1059 | 352 | 2 | scaffold03967: 1065684 - 1067688 | 2.6e-239 |
| CsaWRKY21-2                     | Cucsa.168370 | 555  | 184 | 2 | scaffold01160: 128002 - 129600   | 2.5e-182 |
| CsaWRKY22-1                     | Cucsa.258700 | 1011 | 336 | 2 | scaffold02229: 5548838 - 5550224 | 7.6e-227 |
| CsaWRKY22-2                     | Cucsa.106960 | 810  | 269 | 1 | scaffold00930: 410428 - 412046   | 3.1e-121 |
| CsaWRKY23-1                     | Cucsa.204920 | 793  | 263 | 4 | scaffold01416: 77428 - 81403     | 2.8e-137 |
| CsaWRKY23-2                     | Cucsa.300610 | 999  | 332 | 3 | scaffold02931: 163188 - 166573   | 2.2e-178 |
| CsaWRKY24-1                     | Cucsa.106970 | 603  | 200 | 1 | scaffold00930: 415357 - 417323   | 7.2e-135 |
| CsaWRKY24-2                     | Cucsa.258730 | 540  | 179 | 1 | scaffold02229: 5556162 - 5556853 | 4.5e-120 |
| CsaWRKY26                       | Cucsa.111910 | 1731 | 576 | 4 | scaffold00953: 587817 - 590545   | 0.0e+00  |
| CsaWRKY27                       | Cucsa.201710 | 978  | 326 | 2 | scaffold01376: 1242 - 2616       | 4.0e-180 |
| CsaWRKY31                       | Cucsa.045040 | 1872 | 623 | 5 | scaffold00542: 1143492 - 1146237 | 4.4e-261 |
| CsaWRKY32                       | Cucsa.093390 | 1524 | 507 | 4 | scaffold00915: 21612 - 25288     | 0.0e+00  |
| CsaWRKY33-1                     | Cucsa.000200 | 852  | 283 | 2 | scaffold00009: 1869 - 4028       | 2.4e-190 |
| CsaWRKY33-2                     | Cucsa.176780 | 1434 | 477 | 4 | scaffold01225: 872033 - 875284   | 0.0e+00  |

|             |              |      |     |   |                                  |          |
|-------------|--------------|------|-----|---|----------------------------------|----------|
| CsaWRKY35-1 | Cucsa.096680 | 831  | 276 | 2 | scaffold00919: 2211901 - 2213366 | 6.1e-172 |
| CsaWRKY35-2 | Cucsa.167500 | 1141 | 381 | 2 | scaffold01154: 862999 - 866145   | 2.1e-260 |
| CsaWRKY40-1 | Cucsa.177230 | 948  | 315 | 4 | scaffold01225: 1247154 - 1248879 | 1.6e-222 |
| CsaWRKY40-2 | Cucsa.162810 | 939  | 312 | 3 | scaffold01144: 2340752 - 2342668 | 1.9e-207 |
| CsaWRKY40-3 | Cucsa.271570 | 978  | 325 | 4 | scaffold02500: 391891 - 395153   | 5.7e-215 |
| CsaWRKY41-1 | Cucsa.012940 | 1049 | 348 | 3 | scaffold00164: 728174 - 729549   | 1.6e-222 |
| CsaWRKY41-2 | Cucsa.107310 | 1068 | 355 | 2 | scaffold00930: 705007 - 707249   | 9.7e-246 |
| CsaWRKY41-3 | Cucsa.259110 | 1014 | 337 | 2 | scaffold02229: 5753147 - 5755379 | 2.7e-228 |
| CsaWRKY42   | Cucsa.148640 | 1314 | 437 | 4 | scaffold01107: 707841 - 710754   | 5.3e-289 |
| CsaWRKY44   | Cucsa.307270 | 1029 | 342 | 3 | scaffold02977: 498026 - 500262   | 1.3e-226 |
| CsaWRKY45   | Cucsa.087850 | 399  | 132 | 1 | scaffold00888: 347131 - 348272   | 3.9e-84  |
| CsaWRKY48-1 | Cucsa.247040 | 981  | 326 | 1 | scaffold02188: 75312 - 77735     | 3.8e-221 |
| CsaWRKY48-2 | Cucsa.252440 | 942  | 313 | 2 | scaffold02229: 1365532 - 1366989 | 3.9e-208 |
| CsaWRKY49   | Cucsa.066300 | 943  | 313 | 2 | scaffold00696: 829823 - 831928   | 4.9e-191 |
| CsaWRKY50-1 | Cucsa.056150 | 492  | 163 | 1 | scaffold00602: 334670 - 336496   | 9.1e-15  |
| CsaWRKY50-2 | Cucsa.101530 | 525  | 174 | 2 | scaffold00927: 797073 - 798838   | 2.8e-112 |
| CsaWRKY51   | Cucsa.250350 | 618  | 205 | 2 | scaffold02219: 507446 - 511565   | 2.0e-128 |
| CsaWRKY53   | Cucsa.078810 | 891  | 296 | 2 | scaffold00793: 1259288 - 1260978 | 4.1e-203 |
| CsaWRKY55   | Cucsa.143840 | 954  | 317 | 2 | scaffold01080: 213348 - 219326   | 5.4e-90  |
| CsaWRKY57-1 | Cucsa.327760 | 921  | 306 | 2 | scaffold03159: 104776 - 108670   | 2.8e-110 |
| CsaWRKY57-2 | Cucsa.118200 | 444  | 148 | 2 | scaffold00998: 29643 - 31603     | 3.8e-87  |
| CsaWRKY60   | Cucsa.162820 | 516  | 172 | 2 | scaffold01144: 2350607 - 2351535 | 3.0e-111 |
| CsaWRKY65   | Cucsa.212870 | 858  | 285 | 2 | scaffold01543: 671733 - 673416   | 2.5e-193 |
| CsaWRKY69   | Cucsa.195730 | 1218 | 405 | 1 | scaffold01352: 73603 - 76079     | 1.3e-170 |
| CsaWRKY70-1 | Cucsa.177060 | 843  | 280 | 1 | scaffold01225: 1045156 - 1046394 | 6.0e-193 |
| CsaWRKY70-2 | Cucsa.143830 | 849  | 282 | 2 | scaffold01080: 207400 - 211268   | 3.4e-187 |
| CsaWRKY71-1 | Cucsa.047510 | 786  | 261 | 2 | scaffold00542: 2512823 - 2514698 | 4.1e-173 |
| CsaWRKY71-2 | Cucsa.239590 | 862  | 288 | 2 | scaffold02046: 380323 - 382497   | 6.3e-190 |
| CsaWRKY72-1 | Cucsa.197550 | 1773 | 590 | 4 | scaffold01357: 915560 - 919333   | 0.0e+00  |
| CsaWRKY72-2 | Cucsa.097890 | 1590 | 529 | 3 | scaffold00923: 86796 - 89984     | 0.0e+00  |
| CsaWRKY75-1 | Cucsa.054040 | 513  | 170 | 2 | scaffold00582: 298992 - 302104   | 9.1e-115 |
| CsaWRKY75-2 | Cucsa.095090 | 648  | 215 | 1 | scaffold00919: 1054988 - 1056251 | 2.0e-142 |

*Dictyostelium purpureum*

|                           |                |      |     |   |                                  |          |
|---------------------------|----------------|------|-----|---|----------------------------------|----------|
| DpWRKY3-1                 | 10723          | 525  | 174 | 2 | scaffold_39:96720-97331          | 9.0e-80  |
| DpWRKY3-2                 | 53418          | 1197 | 398 | 2 | scaffold_39:96386-97709          | 1.8e-120 |
| DpWRKY3-3                 | 45948          | 819  | 272 | 2 | scaffold_39:96386-97331          | 3.8e-121 |
| DpWRKY3-4                 | 53422          | 1284 | 427 | 1 | scaffold_39:96386-97709          | 2.7e-131 |
| DpWRKY3-5                 | 76129          | 2619 | 872 | 1 | scaffold_39:96426-99044          | 2.8e-130 |
| DpWRKY3-6                 | 96960          | 2659 | 852 | 1 | scaffold_39:96386-99044          | 2.8e-130 |
| DpWRKY3-7                 | 149043         | 2619 | 872 | 1 | scaffold_39:96426-99044          | 2.8e-130 |
| DpWRKY3-8                 | 28943          | 555  | 184 | 1 | scaffold_39:97155-97709          | 5.7e-41  |
| DpWRKY4                   | 28901          | 546  | 181 | 1 | scaffold_39:97164-97709          | 2.5e-39  |
| <i>Eucalyptus grandis</i> |                |      |     |   |                                  |          |
| EgWRKY1                   | Eucgr.A01053   | 1353 | 450 | 3 | scaffold_1: 16314489 - 16316763  | 6.9e-298 |
| EgWRKY2-1                 | Eucgr.B01415   | 1800 | 600 | 3 | scaffold_2: 23333012 - 23335510  | 0.0e+00  |
| EgWRKY2-2                 | Eucgr.F01981.1 | 2256 | 751 | 5 | scaffold_6: 26563379 - 26567799  | 0.0e+00  |
| EgWRKY3-1                 | Eucgr.G02469   | 1569 | 522 | 4 | scaffold_7: 43236902 - 43240562  | 0.0e+00  |
| EgWRKY3-2                 | Eucgr.B03189   | 1590 | 529 | 3 | scaffold_2: 56937297 - 56942606  | 0.0e+00  |
| EgWRKY4                   | Eucgr.I01998   | 1698 | 565 | 4 | scaffold_9: 29693123 - 29697273  | 0.0e+00  |
| EgWRKY5                   | Eucgr.D01219   | 669  | 222 | 3 | scaffold_4: 22004480 - 22009874  | 5.0e-152 |
| EgWRKY6-1                 | Eucgr.E04011   | 1818 | 605 | 5 | scaffold_5: 69015136 - 69017796  | 0.0e+00  |
| EgWRKY6-2                 | Eucgr.F00740   | 1524 | 507 | 4 | scaffold_6: 9696493 - 9701259    | 0.0e+00  |
| EgWRKY6-3                 | Eucgr.K00786   | 1884 | 627 | 4 | scaffold_11: 9055812 - 9058766   | 0.0e+00  |
| EgWRKY7-1                 | Eucgr.F00187.1 | 1314 | 437 | 3 | scaffold_6: 2897331 - 2900217    | 3.5e-292 |
| EgWRKY7-2                 | Eucgr.I00882   | 1041 | 346 | 2 | scaffold_9: 18107095 - 18109750  | 6.8e-229 |
| EgWRKY9                   | Eucgr.G00619   | 1326 | 441 | 4 | scaffold_7: 10713778 - 10716223  | 3.9e-298 |
| EgWRKY11-1                | Eucgr.C04011   | 1032 | 343 | 2 | scaffold_3: 74743583 - 74745824  | 1.4e-225 |
| EgWRKY11-2                | Eucgr.C00077   | 864  | 287 | 1 | scaffold_3: 3374239 - 3375650    | 1.2e-190 |
| EgWRKY12                  | Eucgr.J03117   | 948  | 315 | 4 | scaffold_10: 38255672 - 38258552 | 3.8e-205 |
| EgWRKY13                  | Eucgr.I00305   | 822  | 273 | 2 | scaffold_9: 5900669 - 5904355    | 3.3e-183 |
| EgWRKY18-1                | Eucgr.C02660   | 867  | 288 | 4 | scaffold_3: 50777598 - 50779966  | 5.4e-192 |
| EgWRKY18-2                | Eucgr.C01943   | 699  | 232 | 2 | scaffold_3: 33718962 - 33719970  | 3.5e-155 |
| EgWRKY18-3                | Eucgr.D01605   | 489  | 162 | 1 | scaffold_4: 29746310 - 29747218  | 6.8e-103 |
| EgWRKY18-4                | Eucgr.F04317   | 801  | 266 | 3 | scaffold_6: 51841944 - 51843982  | 5.9e-178 |
| EgWRKY18-5                | Eucgr.C02659   | 801  | 266 | 3 | scaffold_3: 50768111 - 50770634  | 1.7e-178 |
| EgWRKY20-1                | Eucgr.F03522   | 1803 | 600 | 5 | scaffold_6: 43873432 - 43878504  | 0.0e+00  |



|            |                |      |     |   |                                  |          |
|------------|----------------|------|-----|---|----------------------------------|----------|
| EgWRKY20-2 | Eucgr.F00621   | 1791 | 596 | 6 | scaffold_6: 8242460 - 8248572    | 0.0e+00  |
| EgWRKY21   | Eucgr.B01503   | 1032 | 343 | 2 | scaffold_2: 24748680 - 24751505  | 2.1e-229 |
| EgWRKY22-1 | Eucgr.E00098   | 1077 | 358 | 2 | scaffold_5: 834768 - 836429      | 5.0e-239 |
| EgWRKY22-2 | Eucgr.D02324   | 1191 | 396 | 3 | scaffold_4: 37139105 - 37140698  | 2.1e-255 |
| EgWRKY23-1 | Eucgr.H00996.1 | 975  | 324 | 2 | scaffold_8: 12224321 - 12226370  | 1.5e-215 |
| EgWRKY23-2 | Eucgr.H04061   | 1107 | 368 | 3 | scaffold_8: 58494151 - 58496780  | 1.1e-242 |
| EgWRKY26   | Eucgr.B04010   | 1659 | 552 | 4 | scaffold_2: 63952095 - 63954766  | 0.0e+00  |
| EgWRKY27-1 | Eucgr.A02718   | 1197 | 398 | 2 | scaffold_1: 37801890 - 37803291  | 8.8e-265 |
| EgWRKY27-2 | Eucgr.D01811   | 855  | 284 | 2 | scaffold_4: 32076541 - 32078152  | 1.1e-191 |
| EgWRKY28-1 | Eucgr.A01990   | 726  | 241 | 2 | scaffold_1: 30609302 - 30611790  | 3.0e-160 |
| EgWRKY28-2 | Eucgr.K01219   | 1008 | 335 | 2 | scaffold_11: 15395781 - 15397506 | 9.6e-228 |
| EgWRKY28-3 | Eucgr.D00336   | 897  | 298 | 2 | scaffold_4: 5580615 - 5582270    | 6.9e-202 |
| EgWRKY32-1 | Eucgr.C00348   | 1461 | 486 | 4 | scaffold_3: 6785474 - 6789716    | 0.0e+00  |
| EgWRKY32-2 | Eucgr.C02545   | 1452 | 483 | 4 | scaffold_3: 48605472 - 48611721  | 0.0e+00  |
| EgWRKY32-3 | Eucgr.C02487   | 381  | 126 | 1 | scaffold_3: 47521462 - 47522311  | 3.0e-76  |
| EgWRKY32-4 | Eucgr.C02481   | 1641 | 546 | 5 | scaffold_3: 47447776 - 47454168  | 2.5e-300 |
| EgWRKY33   | Eucgr.K02940   | 1683 | 560 | 4 | scaffold_11: 37455769 - 37458568 | 0.0e+00  |
| EgWRKY35-1 | Eucgr.K01971   | 1353 | 450 | 2 | scaffold_11: 25335850 - 25338428 | 4.1e-309 |
| EgWRKY35-2 | Eucgr.H01007   | 870  | 289 | 1 | scaffold_8: 12328171 - 12329731  | 4.0e-194 |
| EgWRKY36   | Eucgr.G02535   | 1656 | 551 | 2 | scaffold_7: 43853092 - 43855278  | 0.0e+00  |
| EgWRKY40   | Eucgr.F03955   | 1026 | 341 | 4 | scaffold_6: 47868684 - 47871318  | 4.4e-222 |
| EgWRKY41-1 | Eucgr.G00258   | 774  | 257 | 3 | scaffold_7: 4110565 - 4112568    | 2.2e-173 |
| EgWRKY41-2 | Eucgr.K00331   | 1050 | 349 | 4 | scaffold_11: 3886353 - 3888437   | 5.0e-237 |
| EgWRKY41-3 | Eucgr.D02359   | 1014 | 337 | 2 | scaffold_4: 37468304 - 37470736  | 5.2e-231 |
| EgWRKY42   | Eucgr.H04135   | 786  | 261 | 2 | scaffold_8: 59253266 - 59255494  | 2.6e-171 |
| EgWRKY44-1 | Eucgr.K03196   | 1389 | 462 | 6 | scaffold_11: 40611942 - 40617240 | 5.6e-306 |
| EgWRKY44-2 | Eucgr.J02655   | 993  | 330 | 5 | scaffold_10: 32642356 - 32646102 | 3.4e-220 |
| EgWRKY44-3 | Eucgr.A01195   | 1404 | 467 | 6 | scaffold_1: 18649484 - 18654669  | 4.7e-313 |
| EgWRKY45   | Eucgr.H03349   | 561  | 186 | 1 | scaffold_8: 49110786 - 49113127  | 7.3e-125 |
| EgWRKY47   | Eucgr.A01001   | 1608 | 535 | 5 | scaffold_1: 15633648 - 15637795  | 0.0e+00  |
| EgWRKY49-1 | Eucgr.K03115   | 918  | 305 | 2 | scaffold_11: 39724385 - 39725703 | 3.7e-208 |
| EgWRKY49-2 | Eucgr.J01756   | 339  | 112 | 3 | scaffold_10: 22891086 - 22892865 | 2.4e-71  |
| EgWRKY50   | Eucgr.C00675   | 480  | 159 | 2 | scaffold_3: 11929214 - 11930562  | 1.3e-106 |

|                       |                       |      |     |   |                                  |          |
|-----------------------|-----------------------|------|-----|---|----------------------------------|----------|
| EgWRKY51-1            | Eucgr.I00316          | 573  | 190 | 2 | scaffold_9: 6044956 - 6048416    | 9.0e-128 |
| EgWRKY51-2            | Eucgr.I00317          | 576  | 191 | 2 | scaffold_9: 6069028 - 6073301    | 1.7e-127 |
| EgWRKY53-1            | Eucgr.E00850          | 1083 | 360 | 2 | scaffold_5: 8949421 - 8951955    | 9.3e-247 |
| EgWRKY53-2            | Eucgr.G00268          | 870  | 289 | 3 | scaffold_7: 4239973 - 4243006    | 5.6e-201 |
| EgWRKY53-3            | Eucgr.J02653          | 363  | 121 | 1 | scaffold_10: 32596348 - 32597306 | 5.2e-82  |
| EgWRKY54              | Eucgr.G03145          | 966  | 321 | 2 | scaffold_7: 49883728 - 49885656  | 7.8e-217 |
| EgWRKY55-1            | Eucgr.G03144          | 570  | 189 | 2 | scaffold_7: 49877930 - 49880843  | 3.3e-127 |
| EgWRKY55-2            | Eucgr.J00107          | 1092 | 363 | 2 | scaffold_10: 1375836 - 1379405   | 1.4e-245 |
| EgWRKY56-1            | Eucgr.E00096          | 636  | 211 | 1 | scaffold_5: 827344 - 830213      | 1.9e-140 |
| EgWRKY56-2            | Eucgr.D01809          | 624  | 207 | 1 | scaffold_4: 32064347 - 32065452  | 7.1e-143 |
| EgWRKY56-3            | Eucgr.D02326          | 372  | 123 | 1 | scaffold_4: 37146617 - 37147614  | 8.1e-77  |
| EgWRKY57-1            | Eucgr.G02459          | 936  | 311 | 2 | scaffold_7: 43141732 - 43147322  | 5.3e-210 |
| EgWRKY57-2            | Eucgr.B03165          | 984  | 327 | 2 | scaffold_2: 56770199 - 56773947  | 2.3e-221 |
| EgWRKY65              | Eucgr.E02783          | 1113 | 370 | 3 | scaffold_5: 45370118 - 45372351  | 1.5e-251 |
| EgWRKY69              | Eucgr.K01151          | 834  | 277 | 2 | scaffold_11: 14565246 - 14567796 | 8.0e-184 |
| EgWRKY70-1            | Eucgr.J00106          | 960  | 319 | 2 | scaffold_10: 1369903 - 1371673   | 2.9e-215 |
| EgWRKY70-2            | Eucgr.K01289          | 753  | 251 | 2 | scaffold_11: 16072134 - 16073251 | 1.1e-165 |
| EgWRKY72-1            | Eucgr.K02453          | 1641 | 546 | 4 | scaffold_11: 31858355 - 31862519 | 0.0e+00  |
| EgWRKY72-2            | Eucgr.B00437          | 1641 | 546 | 2 | scaffold_2: 5560588 - 5562746    | 0.0e+00  |
| EgWRKY72-3            | Eucgr.I01927          | 1194 | 397 | 3 | scaffold_9: 29205003 - 29207324  | 2.4e-268 |
| EgWRKY75-1            | Eucgr.I01633          | 543  | 180 | 2 | scaffold_9: 26294756 - 26296529  | 1.1e-119 |
| EgWRKY75-2            | Eucgr.B03520          | 633  | 210 | 1 | scaffold_2: 59850633 - 59853374  | 3.6e-141 |
| <i>Fragaria vesca</i> |                       |      |     |   |                                  |          |
| FvWRKY1               | gene21591-v1.0-hybrid | 1518 | 505 | 3 | LG3: 3591920 - 3593898           | 1.0e-194 |
| FvWRKY2               | gene01197-v1.0-hybrid | 2205 | 734 | 4 | LG3: 28842077 - 28845292         | 0.0e+00  |
| FvWRKY3               | gene04391-v1.0-hybrid | 1560 | 519 | 3 | LG6: 33441504 - 33444478         | 4.0e-25  |
| FvWRKY5               | gene04864-v1.0-hybrid | 918  | 305 | 4 | LG7: 10593300 - 10597571         | 7.1e-73  |
| FvWRKY6-1             | gene03411-v1.0-hybrid | 1644 | 547 | 5 | LG3: 13659296 - 13661974         | 4.0e-162 |
| FvWRKY6-2             | gene19478-v1.0-hybrid | 1941 | 646 | 8 | LG3: 635329 - 638908             | 7.9e-222 |
| FvWRKY6-3             | gene23963-v1.0-hybrid | 2124 | 707 | 8 | LG6: 34573480 - 34579047         | 1.2e-272 |
| FvWRKY7               | gene09147-v1.0-hybrid | 1005 | 334 | 2 | LG2: 21403605 - 21404884         | 1.1e-122 |
| FvWRKY9               | gene11774-v1.0-hybrid | 1698 | 565 | 4 | LG5: 21244362 - 21246895         | 2.6e-171 |
| FvWRKY11-1            | gene08720-v1.0-hybrid | 1029 | 342 | 2 | LG2: 19889909 - 19891443         | 2.9e-153 |

|            |                       |      |      |    |                          |          |
|------------|-----------------------|------|------|----|--------------------------|----------|
| FvWRKY11-2 | gene12308-v1.0-hybrid | 906  | 301  | 2  | LG5: 26018822 - 26019967 | 2.5e-135 |
| FvWRKY13   | gene21124-v1.0-hybrid | 717  | 238  | 2  | LG1: 16977774 - 16980821 | 3.6e-101 |
| FvWRKY15   | gene23862-v1.0-hybrid | 831  | 276  | 4  | LG6: 35103225 - 35110058 | 2.0e-54  |
| FvWRKY16   | gene03900-v1.0-hybrid | 4032 | 1343 | 10 | LG7: 9804380 - 9813690   | 2.1e-244 |
| FvWRKY19   | gene19013-v1.0-hybrid | 534  | 177  | 0  | LG7: 2541061 - 2541594   | 1.3e-39  |
| FvWRKY20   | gene03549-v1.0-hybrid | 1557 | 518  | 5  | LG3: 14487626 - 14495950 | 2.1e-305 |
| FvWRKY22   | gene19019-v1.0-hybrid | 1038 | 345  | 2  | LG7: 2562323 - 2563625   | 2.5e-120 |
| FvWRKY23   | gene20560-v1.0-hybrid | 954  | 317  | 2  | LG1: 20082299 - 20083620 | 2.4e-98  |
| FvWRKY26   | gene28174-v1.0-hybrid | 1863 | 620  | 4  | LG3: 20524762 - 20527524 | 1.4e-277 |
| FvWRKY27   | gene13173-v1.0-hybrid | 1293 | 430  | 2  | LG7: 21242062 - 21243525 | 1.2e-95  |
| FvWRKY28   | gene24904-v1.0-hybrid | 1068 | 355  | 2  | LG3: 4220487 - 4222135   | 3.5e-113 |
| FvWRKY29   | gene31843-v1.0-hybrid | 2283 | 760  | 9  | LG5: 2002496 - 2009299   | 1.6e-282 |
| FvWRKY32   | gene10079-v1.0-hybrid | 1401 | 466  | 4  | LG1: 281288 - 284149     | 1.1e-204 |
| FvWRKY33   | gene13803-v1.0-hybrid | 1686 | 561  | 5  | LG6: 7284891 - 7287320   | 7.4e-221 |
| FvWRKY34   | gene16807-v1.0-hybrid | 2286 | 761  | 5  | LG6: 1447575 - 1451329   | 0.0e+00  |
| FvWRKY35-1 | gene02269-v1.0-hybrid | 942  | 313  | 3  | LG5: 26381817 - 26383230 | 4.1e-97  |
| FvWRKY35-2 | gene20152-v1.0-hybrid | 1479 | 492  | 2  | LG3: 8405751 - 8408398   | 2.4e-174 |
| FvWRKY40-1 | gene15841-v1.0-hybrid | 1509 | 502  | 7  | LG6: 22439617 - 22446682 | 1.3e-168 |
| FvWRKY40-2 | gene15014-v1.0-hybrid | 1149 | 382  | 4  | LG2: 21673839 - 21675524 | 1.6e-89  |
| FvWRKY40-3 | gene15013-v1.0-hybrid | 996  | 331  | 2  | LG2: 21669642 - 21670851 | 4.7e-71  |
| FvWRKY41   | gene13108-v1.0-hybrid | 1119 | 372  | 2  | LG7: 20935978 - 20937321 | 8.5e-112 |
| FvWRKY44   | gene18152-v1.0-hybrid | 1578 | 525  | 5  | LG6: 4327714 - 4330593   | 2.3e-258 |
| FvWRKY46   | gene19219-v1.0-hybrid | 1062 | 353  | 2  | LG7: 2055090 - 2057069   | 2.2e-127 |
| FvWRKY47   | gene24479-v1.0-hybrid | 1494 | 497  | 6  | LG1: 12364984 - 12367865 | 4.7e-90  |
| FvWRKY49   | gene18438-v1.0-hybrid | 891  | 296  | 2  | LG6: 5465141 - 5466865   | 7.2e-135 |
| FvWRKY50   | gene15421-v1.0-hybrid | 504  | 167  | 3  | LG6: 13781559 - 13782341 | 1.1e-44  |
| FvWRKY51   | gene22024-v1.0-hybrid | 573  | 190  | 2  | LG1: 15966976 - 15969351 | 1.8e-62  |
| FvWRKY53   | gene32076-v1.0-hybrid | 1068 | 355  | 2  | LG5: 2661783 - 2663245   | 1.0e-149 |
| FvWRKY52   | gene16678-v1.0-hybrid | 3582 | 1193 | 9  | LG6: 802048 - 808355     | 1.2e-227 |
| FvWRKY55   | gene21364-v1.0-hybrid | 1038 | 345  | 2  | LG7: 18245294 - 18247359 | 7.5e-113 |
| FvWRKY59   | gene01596-v1.0-hybrid | 1812 | 603  | 8  | LG3: 30785013 - 30789621 | 5.4e-302 |
| FvWRKY61   | gene01256-v1.0-hybrid | 1476 | 491  | 3  | LG6: 1608399 - 1610329   | 1.8e-159 |
| FvWRKY65   | gene29704-v1.0-hybrid | 834  | 277  | 2  | LG3: 5236525 - 5237616   | 1.3e-99  |

|                    |                       |      |      |    |                           |          |
|--------------------|-----------------------|------|------|----|---------------------------|----------|
| FvWRKY68           | gene05066-v1.0-hybrid | 1455 | 484  | 3  | LG4: 22160877 - 22162817  | 1.6e-128 |
| FvWRKY69           | gene15798-v1.0-hybrid | 1860 | 619  | 10 | LG6: 21741467 - 21754337  | 1.2e-84  |
| FvWRKY70-1         | gene21365-v1.0-hybrid | 1023 | 340  | 2  | LG7: 18248035 - 18250011  | 2.0e-83  |
| FvWRKY70-2         | gene13554-v1.0-hybrid | 894  | 297  | 2  | LG6: 7804584 - 7805985    | 1.9e-51  |
| FvWRKY70-3         | gene13549-v1.0-hybrid | 696  | 231  | 2  | LG6: 7783840 - 7785119    | 2.6e-48  |
| FvWRKY70-4         | gene13561-v1.0-hybrid | 1854 | 617  | 9  | LG6: 7828500 - 7832084    | 2.2e-138 |
| FvWRKY70-5         | gene13547-v1.0-hybrid | 1035 | 344  | 2  | LG6: 7777604 - 7779180    | 2.0e-89  |
| FvWRKY70-6         | gene13546-v1.0-hybrid | 1344 | 447  | 3  | LG6: 7769418 - 7771442    | 9.5e-85  |
| FvWRKY70-7         | gene21370-v1.0-hybrid | 5949 | 1982 | 20 | LG7: 18263740 - 18277966  | 7.2e-179 |
| FvWRKY71           | gene28720-v1.0-hybrid | 1107 | 368  | 2  | LG6: 29859819 - 29861803  | 1.1e-131 |
| FvWRKY72           | gene25959-v1.0-hybrid | 2019 | 672  | 5  | LG5: 6871174 - 6874246    | 1.7e-229 |
| FvWRKY74           | gene16584-v1.0-hybrid | 960  | 319  | 2  | LG6: 257908 - 259177      | 2.6e-103 |
| FvWRKY75           | gene01340-v1.0-hybrid | 627  | 208  | 1  | LG6: 37734638 - 37735974  | 7.7e-56  |
| <i>Glycine max</i> |                       |      |      |    |                           |          |
| GmWRKY1-1          | Glyma.14G010100       | 1527 | 508  | 4  | Gm14: 528643 - 532717     | 0.0e+00  |
| GmWRKY1-2          | Glyma.02G306300       | 1524 | 507  | 3  | Gm02: 51172225 - 51175238 | 0.0e+00  |
| GmWRKY2-1          | Glyma.09G250500       | 2205 | 734  | 4  | Gm09: 43917299 - 43921359 | 0.0e+00  |
| GmWRKY2-2          | Glyma.18G242000       | 2235 | 744  | 4  | Gm18: 57313933 - 57318035 | 0.0e+00  |
| GmWRKY3-1          | Glyma.08G240800       | 1572 | 523  | 3  | Gm08: 20589275 - 20594206 | 0.0e+00  |
| GmWRKY3-2          | Glyma.18G263400       | 1563 | 520  | 3  | Gm18: 59146800 - 59153340 | 0.0e+00  |
| GmWRKY3-3          | Glyma.20G028000       | 1320 | 439  | 3  | Gm20: 3214242 - 3219009   | 3.5e-296 |
| GmWRKY3-4          | Glyma.07G227200       | 1602 | 533  | 3  | Gm07: 40532555 - 40536935 | 0.0e+00  |
| GmWRKY4-1          | Glyma.02G112100       | 1368 | 455  | 3  | Gm02: 10771329 - 10776673 | 3.1e-309 |
| GmWRKY4-2          | Glyma.01G053800       | 1368 | 455  | 3  | Gm01: 6797683 - 6802949   | 5.4e-308 |
| GmWRKY4-3          | Glyma.10G171100       | 579  | 192  | 2  | Gm10: 39913162 - 39914994 | 8.3e-129 |
| GmWRKY5-1          | Glyma.03G109100       | 717  | 238  | 3  | Gm03: 33037355 - 33045604 | 2.0e-161 |
| GmWRKY5-2          | Glyma.07G116300       | 714  | 237  | 3  | Gm07: 12609537 - 12618154 | 2.5e-160 |
| GmWRKY6-1          | Glyma.08G320200       | 1461 | 486  | 5  | Gm08: 43093454 - 43098754 | 6.5e-316 |
| GmWRKY6-2          | Glyma.18G092200       | 1437 | 478  | 6  | Gm18: 9200615 - 9205258   | 1.5e-311 |
| GmWRKY6-3          | Glyma.02G293400       | 1206 | 401  | 5  | Gm02: 50283764 - 50286048 | 1.0e-226 |
| GmWRKY6-4          | Glyma.09G005700       | 1626 | 541  | 5  | Gm09: 442505 - 444996     | 7.1e-254 |
| GmWRKY6-5          | Glyma.15G110300       | 1800 | 599  | 6  | Gm15: 8605739 - 8608639   | 1.7e-236 |
| GmWRKY6-6          | Glyma.13G310100       | 1845 | 614  | 4  | Gm13: 39385541 - 39388538 | 0.0e+00  |

|            |                  |      |     |   |                           |          |
|------------|------------------|------|-----|---|---------------------------|----------|
| GmWRKY6-7  | Glyma.17G042300  | 1176 | 391 | 6 | Gm17: 3142418 - 3147382   | 7.1e-254 |
| GmWRKY6-8  | Glyma.13G117600  | 1152 | 383 | 6 | Gm13: 21520430 - 21524539 | 3.6e-250 |
| GmWRKY9    | Glyma.05G123000  | 1086 | 361 | 4 | Gm05: 31405618 - 31408779 | 3.1e-245 |
| GmWRKY10   | Glyma.10G171200  | 1011 | 336 | 2 | Gm10: 39917393 - 39919651 | 9.3e-230 |
| GmWRKY11-1 | Glyma.06G077400  | 903  | 300 | 2 | Gm06: 5977269 - 5979353   | 3.9e-200 |
| GmWRKY11-2 | Glyma.04G076200  | 840  | 279 | 2 | Gm04: 6305276 - 6307509   | 0.0e+00  |
| GmWRKY11-3 | Glyma.17G057100  | 963  | 320 | 2 | Gm17: 4598261 - 4600061   | 5.3e-210 |
| GmWRKY11-4 | Glyma.13G102000  | 975  | 324 | 2 | Gm13: 124039 - 126153     | 2.5e-213 |
| GmWRKY11-5 | Glyma.09G061900  | 891  | 296 | 2 | Gm09: 5816890 - 5819213   | 3.5e-196 |
| GmWRKY11-6 | Glyma.15G168200  | 882  | 293 | 2 | Gm15: 14920582 - 14923248 | 6.3e-192 |
| GmWRKY11-7 | Glyma.14G135400  | 951  | 316 | 2 | Gm14: 19599747 - 19602939 | 7.1e-212 |
| GmWRKY11-8 | Glyma.17G197500  | 951  | 316 | 2 | Gm17: 31439925 - 31443097 | 2.2e-211 |
| GmWRKY13-1 | Glyma.06G147500  | 711  | 236 | 2 | Gm06: 12006001 - 12009597 | 1.2e-160 |
| GmWRKY13-2 | Glyma.04G218400  | 705  | 234 | 2 | Gm04: 45815335 - 45818630 | 9.7e-159 |
| GmWRKY13-3 | Glyma.08G143400  | 708  | 235 | 2 | Gm08: 11030859 - 11033309 | 8.1e-159 |
| GmWRKY13-4 | Glyma.05G185400  | 651  | 216 | 3 | Gm05: 36943087 - 36944876 | 1.4e-144 |
| GmWRKY14-1 | Glyma.15G135600  | 1572 | 523 | 2 | Gm15: 10844191 - 10848519 | 0.0e+00  |
| GmWRKY14-2 | Glyma.09G029800  | 1521 | 506 | 3 | Gm09: 2438308 - 2442432   | 0.0e+00  |
| GmWRKY15-1 | Glyma.05G096500  | 1005 | 334 | 2 | Gm05: 24873227 - 24875484 | 2.3e-220 |
| GmWRKY15-2 | Glyma.17G168900  | 999  | 332 | 2 | Gm17: 15865432 - 15867630 | 2.5e-219 |
| GmWRKY15-3 | Glyma.01G189100  | 966  | 321 | 2 | Gm01: 51531990 - 51534998 | 1.5e-210 |
| GmWRKY15-4 | Glyma.11G053100  | 966  | 321 | 2 | Gm11: 3985041 - 3986941   | 2.1e-174 |
| GmWRKY18   | Glyma.10G113800  | 363  | 120 | 7 | Gm10: 15478720 - 15479844 | 3.7e-79  |
| GmWRKY20-1 | Glyma.18G081200  | 1734 | 577 | 5 | Gm18: 7809793 - 7816449   | 0.0e+00  |
| GmWRKY20-2 | Glyma.08G325800  | 1734 | 577 | 5 | Gm08: 43556471 - 43562640 | 0.0e+00  |
| GmWRKY20-3 | Glyma.06G2242200 | 531  | 177 | 2 | Gm06: 39491007 - 39494203 | 9.5e-124 |
| GmWRKY20-4 | Glyma.02G297400  | 1767 | 588 | 5 | Gm02: 50580953 - 50586936 | 0.0e+00  |
| GmWRKY20-5 | Glyma.14G016200  | 1758 | 585 | 5 | Gm14: 1152651 - 1158381   | 0.0e+00  |
| GmWRKY21-1 | Glyma.03G159700  | 1026 | 341 | 3 | Gm03: 39496945 - 39499620 | 3.9e-231 |
| GmWRKY21-2 | Glyma.10G032900  | 1179 | 392 | 3 | Gm10: 2862399 - 2866142   | 6.5e-269 |
| GmWRKY21-3 | Glyma.02G141000  | 942  | 313 | 3 | Gm02: 14383057 - 14385983 | 1.6e-238 |
| GmWRKY22-1 | Glyma.16G031900  | 1008 | 335 | 2 | Gm16: 2995485 - 2997591   | 6.0e-223 |
| GmWRKY22-2 | Glyma.09G254800  | 1047 | 348 | 2 | Gm09: 44201235 - 44203532 | 4.6e-226 |

|            |                 |      |     |   |                           |          |
|------------|-----------------|------|-----|---|---------------------------|----------|
| GmWRKY22-3 | Glyma.18G238200 | 1056 | 351 | 2 | Gm18: 56995337 - 56997541 | 4.1e-192 |
| GmWRKY23-1 | Glyma.02G010900 | 963  | 320 | 2 | Gm02: 1024239 - 1026604   | 1.1e-215 |
| GmWRKY23-2 | Glyma.10G011300 | 972  | 323 | 3 | Gm10: 1069805 - 1073166   | 0.0e+00  |
| GmWRKY23-3 | Glyma.19G217800 | 873  | 290 | 2 | Gm19: 46938033 - 46940019 | 4.1e-192 |
| GmWRKY23-4 | Glyma.03G220800 | 864  | 287 | 2 | Gm03: 44408648 - 44410652 | 2.9e-189 |
| GmWRKY23-5 | Glyma.07G238000 | 1176 | 391 | 3 | Gm07: 41980063 - 41983090 | 9.1e-261 |
| GmWRKY26-1 | Glyma.11G163300 | 1647 | 548 | 4 | Gm11: 30492982 - 30497039 | 0.0e+00  |
| GmWRKY26-2 | Glyma.02G232600 | 1743 | 580 | 4 | Gm02: 45077200 - 45080698 | 0.0e+00  |
| GmWRKY26-3 | Glyma.14G200200 | 1728 | 575 | 4 | Gm14: 47231177 - 47234695 | 0.0e+00  |
| GmWRKY27-1 | Glyma.16G177000 | 1227 | 408 | 2 | Gm16: 33345959 - 33347937 | 1.9e-277 |
| GmWRKY27-2 | Glyma.16G176700 | 795  | 264 | 2 | Gm16: 33312431 - 33313552 | 1.9e-176 |
| GmWRKY27-3 | Glyma.20G163200 | 966  | 321 | 2 | Gm20: 38962125 - 38964176 | 1.9e-215 |
| GmWRKY27-4 | Glyma.10G230200 | 894  | 297 | 2 | Gm10: 45452410 - 45454348 | 2.2e-198 |
| GmWRKY29-1 | Glyma.11G021200 | 645  | 214 | 1 | Gm11: 1499929 - 1501106   | 7.9e-148 |
| GmWRKY29-2 | Glyma.08G018300 | 879  | 292 | 1 | Gm08: 1472660 - 1474670   | 2.1e-201 |
| GmWRKY30-1 | Glyma.06G125600 | 1095 | 364 | 2 | Gm06: 10228530 - 10230877 | 9.3e-248 |
| GmWRKY30-2 | Glyma.04G238300 | 1095 | 364 | 2 | Gm04: 47554015 - 47556817 | 1.3e-245 |
| GmWRKY32-1 | Glyma.12G152600 | 1404 | 467 | 4 | Gm12: 26693600 - 26703518 | 3.5e-310 |
| GmWRKY32-2 | Glyma.17G074000 | 1518 | 505 | 4 | Gm17: 6042312 - 6050551   | 0.0e+00  |
| GmWRKY32-3 | Glyma.02G203800 | 1518 | 505 | 4 | Gm02: 41991807 - 41999656 | 0.0e+00  |
| GmWRKY33-1 | Glyma.01G128100 | 1524 | 507 | 4 | Gm01: 43157132 - 43160950 | 0.0e+00  |
| GmWRKY33-2 | Glyma.09G280200 | 1632 | 543 | 4 | Gm09: 46340575 - 46343915 | 0.0e+00  |
| GmWRKY33-3 | Glyma.18G208800 | 1626 | 541 | 4 | Gm18: 53613987 - 53617649 | 0.0e+00  |
| GmWRKY35-1 | Glyma.08G078700 | 1290 | 429 | 2 | Gm08: 5992220 - 5996320   | 5.2e-291 |
| GmWRKY35-2 | Glyma.05G123600 | 1293 | 430 | 2 | Gm05: 31474087 - 31478680 | 8.0e-291 |
| GmWRKY35-3 | Glyma.03G220100 | 726  | 253 | 2 | Gm03: 44338246 - 44340268 | 1.0e-167 |
| GmWRKY35-4 | Glyma.19G217000 | 795  | 264 | 2 | Gm19: 46863558 - 46865575 | 2.0e-188 |
| GmWRKY40-1 | Glyma.14G102900 | 837  | 278 | 3 | Gm14: 10467577 - 10470309 | 3.0e-184 |
| GmWRKY40-2 | Glyma.17G222500 | 837  | 278 | 3 | Gm17: 37829298 - 37831665 | 6.7e-185 |
| GmWRKY40-3 | Glyma06g06530   | 885  | 294 | 3 | Gm06: 4658653 - 4660672   | 4.3e-194 |
| GmWRKY40-4 | Glyma.04G061400 | 663  | 220 | 3 | Gm04: 4944422 - 4946197   | 2.8e-146 |
| GmWRKY40-5 | Glyma.08G218600 | 942  | 313 | 4 | Gm08: 17848730 - 17851238 | 3.0e-184 |
| GmWRKY40-6 | Glyma.07G023300 | 936  | 311 | 4 | Gm07: 1769990 - 1772543   | 1.4e-201 |

|             |                 |      |      |   |                           |          |
|-------------|-----------------|------|------|---|---------------------------|----------|
| GmWRKY40-7  | Glyma.13G370100 | 930  | 309  | 4 | Gm13: 44119893 - 44122197 | 1.3e-201 |
| GmWRKY40-8  | Glyma.15G003300 | 993  | 330  | 4 | Gm15: 289709 - 291897     | 5.1e-200 |
| GmWRKY40-9  | Glyma.14G103100 | 849  | 282  | 3 | Gm14: 10543820 - 10545893 | 9.9e-212 |
| GmWRKY40-10 | Glyma.17G222300 | 939  | 312  | 3 | Gm17: 37801991 - 37804561 | 1.3e-186 |
| GmWRKY41-1  | Glyma.08G021900 | 1080 | 359  | 2 | Gm08:1759380 - 1761625    | 9.5e-249 |
| GmWRKY41-2  | Glyma.01G224800 | 969  | 322  | 2 | Gm01: 54433422 - 54435852 | 9.2e-219 |
| GmWRKY41-3  | Glyma.05G215900 | 1092 | 363  | 2 | Gm05: 40700822 - 40702765 | 2.7e-250 |
| GmWRKY41-4  | Glyma.19G254800 | 1089 | 362  | 2 | Gm19: 49828036 - 49830844 | 1.1e-246 |
| GmWRKY41-5  | Glyma.03G256700 | 1089 | 362  | 2 | Gm03: 47154487 - 47158248 | 1.7e-250 |
| GmWRKY41-6  | Glyma.16G026400 | 1122 | 373  | 2 | Gm16: 2538810 - 2542188   | 2.6e-253 |
| GmWRKY41-7  | Glyma.07G057400 | 1110 | 369  | 2 | Gm07: 5052597 - 5055648   | 9.6e-243 |
| GmWRKY42    | Glyma.15G186300 | 1356 | 451  | 5 | Gm15: 19180353 - 19185976 | 2.1e-303 |
| GmWRKY44-1  | Glyma.03G176600 | 1347 | 448  | 6 | Gm03: 40963184 - 40972913 | 4.7e-302 |
| GmWRKY44-2  | Glyma.19G177400 | 1416 | 471  | 6 | Gm19: 43469225 - 43478174 | 0.0e+00  |
| GmWRKY47-1  | Glyma.02G007500 | 1455 | 484  | 6 | Gm02: 777358 - 781690     | 0.0e+00  |
| GmWRKY47-2  | Glyma.03G224700 | 1626 | 541  | 5 | Gm03: 44705517 - 44709700 | 0.0e+00  |
| GmWRKY47-3  | Glyma.19G221700 | 1551 | 516  | 5 | Gm19: 47231197 - 47236101 | 0.0e+00  |
| GmWRKY48-1  | Glyma.15G139000 | 1071 | 356  | 3 | Gm15: 11291206 - 11294060 | 9.7e-240 |
| GmWRKY48-2  | Glyma.09G034300 | 996  | 331  | 2 | Gm09: 2824460 - 2827541   | 8.9e-221 |
| GmWRKY49    | Glyma.14G199800 | 999  | 332  | 0 | Gm14: 47189224 - 47190551 | 8.0e-226 |
| GmWRKY50-1  | Glyma.04G054200 | 486  | 161  | 2 | Gm04: 4349265 - 4350787   | 7.2e-109 |
| GmWRKY50-2  | Glyma.06G054500 | 528  | 175  | 2 | Gm06: 4090868 - 4092314   | 3.0e-119 |
| GmWRKY51-1  | Glyma.06G147100 | 591  | 196  | 2 | Gm06: 11960799 - 11964431 | 3.1e-132 |
| GmWRKY51-2  | Glyma.04G218700 | 591  | 196  | 2 | Gm04: 45843086 - 45845805 | 2.6e-132 |
| GmWRKY51-3  | Glyma.08G142400 | 555  | 184  | 2 | Gm08: 10932560 - 10935883 | 1.8e-122 |
| GmWRKY51-4  | Glyma.05G184500 | 567  | 188  | 2 | Gm05: 36852753 - 36855968 | 4.3e-127 |
| GmWRKY54-1  | Glyma.14G186000 | 912  | 303  | 2 | Gm14: 45729764 - 45734659 | 1.7e-205 |
| GmWRKY54-2  | Glyma.14G186100 | 723  | 240  | 2 | Gm14: 45743350 - 45755195 | 7.1e-159 |
| GmWRKY55-1  | Glyma.06G142100 | 966  | 331  | 2 | Gm06: 11540905 - 11545294 | 1.5e-220 |
| GmWRKY55-2  | Glyma.04G223200 | 1014 | 337  | 2 | Gm04: 46249199 - 46253557 | 8.7e-225 |
| GmWRKY55-3  | Glyma.05G165800 | 4068 | 1355 | 4 | Gm05: 35364051 - 35374699 | 0.0e+00  |
| GmWRKY56-1  | Glyma.16G031400 | 588  | 195  | 1 | Gm16: 2926618 - 2929426   | 6.5e-130 |
| GmWRKY56-2  | Glyma.09G254400 | 579  | 192  | 1 | Gm09: 44180119 - 44182004 | 1.7e-132 |

|                            |                  |      |     |   |                            |          |
|----------------------------|------------------|------|-----|---|----------------------------|----------|
| GmWRKY56-3                 | Glyma.18G238600  | 579  | 192 | 1 | Gm18: 57020427 - 57022363  | 5.0e-131 |
| GmWRKY57-1                 | Glyma.02G115200  | 882  | 293 | 3 | Gm02: 11099498 - 11107140  | 1.2e-198 |
| GmWRKY57-2                 | Glyma.01G056800  | 894  | 297 | 3 | Gm01: 7343213 - 7351310    | 5.4e-201 |
| GmWRKY65-1                 | Glyma.08G118200  | 786  | 261 | 2 | Gm08: 9144547 - 9146579    | 1.4e-178 |
| GmWRKY65-2                 | Glyma.05G160800  | 768  | 255 | 2 | Gm05: 34988297 - 34990342  | 6.9e-173 |
| GmWRKY67                   | Glyma.03G002300  | 816  | 271 | 2 | Gm03: 226019 - 227944      | 3.5e-184 |
| GmWRKY69-1                 | Glyma.13G289400  | 798  | 265 | 2 | Gm13: 37784521 - 37787501  | 5.1e-178 |
| GmWRKY69-2                 | Glyma.12G212300  | 792  | 263 | 2 | Gm12: 37175797 - 37178917  | 6.6e-177 |
| GmWRKY70-1                 | Glyma.06G142000  | 960  | 319 | 2 | Gm06: 11533270 - 11536206  | 3.3e-214 |
| GmWRKY70-2                 | Glyma.04G223300  | 954  | 317 | 2 | Gm04: 46258375 - 46261231  | 3.1e-213 |
| GmWRKY70-3                 | Glyma.13G267500  | 891  | 296 | 2 | Gm13: 35876645 - 35879941  | 3.5e-196 |
| GmWRKY70-4                 | Glyma.13G267600  | 903  | 300 | 2 | Gm13: 35882273 - 35884554  | 4.2e-200 |
| GmWRKY70-5                 | Glyma.13G267700  | 813  | 270 | 3 | Gm13: 35889478 - 35896451  | 3.0e-181 |
| GmWRKY70-6                 | Glyma.18G213200  | 900  | 299 | 2 | Gm18: 54287738 - 54289805  | 3.2e-199 |
| GmWRKY70-7                 | Glyma.09G274000  | 903  | 300 | 2 | Gm09: 45810286 - 45812389  | 9.7e-202 |
| GmWRKY71-1                 | Glyma.05G127600  | 1077 | 358 | 2 | Gm05: 31804493 - 31806949  | 6.1e-241 |
| GmWRKY71-2                 | Glyma.02G285900  | 1014 | 337 | 2 | Gm02: 49752561 - 49755310  | 1.0e-228 |
| GmWRKY71-3                 | Glyma.14G028900  | 1008 | 335 | 2 | Gm14: 2101859 - 2104895    | 2.0e-226 |
| GmWRKY72-1                 | Glyma.02G020300  | 1584 | 527 | 3 | Gm02: 1814440 - 1822699    | 0.0e+00  |
| GmWRKY72-2                 | Glyma.01G043300  | 1530 | 509 | 3 | Gm01: 4685834 - 4692108    | 0.0e+00  |
| GmWRKY72-3                 | Glyma.19G020600  | 1488 | 496 | 3 | Gm19: 2182474 - 2185528    | 0.0e+00  |
| GmWRKY72-4                 | Glyma.09G240000  | 1626 | 541 | 3 | Gm09: 43034331 - 43037563  | 0.0e+00  |
| GmWRKY72-5                 | Glyma.06G190800  | 1848 | 615 | 4 | Gm06: 16715202 - 16720374  | 0.0e+00  |
| GmWRKY72-6                 | Glyma.05G029000  | 1785 | 594 | 5 | Gm05: 811057 - 817892      | 0.0e+00  |
| GmWRKY75-1                 | Glyma.08G011300  | 444  | 147 | 1 | Gm08: 898774 - 900025      | 7.1e-96  |
| GmWRKY75-2                 | Glyma.19G094100  | 567  | 188 | 1 | Gm19: 33118585 - 33121094  | 9.0e-124 |
| GmWRKY75-3                 | Glyma.16G054400  | 588  | 195 | 1 | Gm16: 5308516 - 5311399    | 6.6e-129 |
| <i>Gossypium raimondii</i> |                  |      |     |   |                            |          |
| GrWRKY1-1                  | Gorai.007G167100 | 1212 | 403 | 4 | Chr07: 14851777 - 14854906 | 5.9e-269 |
| GrWRKY1-2                  | Gorai.001G192900 | 1326 | 441 | 4 | Chr01: 32649781 - 32652799 | 5.2e-294 |
| GrWRKY2-1                  | Gorai.004G034600 | 2178 | 725 | 5 | Chr04: 2832238 - 2836240   | 0.0e+00  |
| GrWRKY2-2                  | Gorai.013G179400 | 2292 | 763 | 5 | Chr13: 47309619 - 47316117 | 0.0e+00  |
| GrWRKY2-3                  | Gorai.012G028200 | 2196 | 731 | 5 | Chr12: 3473845 - 3479955   | 0.0e+00  |



|            |                  |      |     |    |                            |          |
|------------|------------------|------|-----|----|----------------------------|----------|
| GrWRKY4-1  | Gorai.013G090200 | 1470 | 489 | 3  | Chr13: 14470859 - 14473687 | 0.0e+00  |
| GrWRKY4-2  | Gorai.012G186000 | 1458 | 185 | 3  | Chr12: 35310771 - 35314216 | 0.0e+00  |
| GrWRKY4-3  | Gorai.001G241200 | 1365 | 454 | 3  | Chr01: 48091763 - 48094329 | 9.2e-311 |
| GrWRKY4-4  | Gorai.012G051500 | 1551 | 516 | 3  | Chr12: 6660221 - 6663718   | 0.0e+00  |
| GrWRKY4-5  | Gorai.006G013300 | 1527 | 508 | 3  | Chr06: 2815112 - 2818026   | 0.0e+00  |
| GrWRKY5-1  | Gorai.004G166800 | 624  | 207 | 3  | Chr04: 46355569 - 46358423 | 8.5e-142 |
| GrWRKY5-2  | Gorai.004G069500 | 654  | 217 | 3  | Chr04: 7297650 - 7301317   | 8.9e-146 |
| GrWRKY5-3  | Gorai.008G109600 | 651  | 216 | 3  | Chr08: 34056566 - 34059350 | 8.5e-147 |
| GrWRKY6-1  | Gorai.001G214800 | 1683 | 560 | 4  | Chr01: 42975207 - 42978080 | 0.0e+00  |
| GrWRKY6-2  | Gorai.007G171900 | 1563 | 520 | 4  | Chr07: 15750859 - 15752772 | 0.0e+00  |
| GrWRKY6-3  | Gorai.002G091300 | 1578 | 525 | 5  | Chr02: 11519176 - 11521924 | 0.0e+00  |
| GrWRKY6-4  | Gorai.011G012700 | 1641 | 546 | 4  | Chr11: 896914 - 899719     | 0.0e+00  |
| GrWRKY6-5  | Gorai.001G094300 | 1548 | 515 | 4  | Chr01: 10451369 - 10453540 | 0.0e+00  |
| GrWRKY6-6  | Gorai.009G180400 | 1698 | 565 | 5  | Chr09: 13897793 - 13900521 | 0.0e+00  |
| GrWRKY7-1  | Gorai.010G022600 | 957  | 318 | 2  | Chr10: 1787230 - 1789404   | 4.8e-215 |
| GrWRKY7-2  | Gorai.009G214800 | 1077 | 358 | 2  | Chr09: 16695025 - 16697303 | 3.1e-238 |
| GrWRKY7-3  | Gorai.007G216700 | 1032 | 343 | 2  | Chr07: 24508940 - 24510713 | 4.6e-227 |
| GrWRKY7-4  | Gorai.003G026600 | 951  | 316 | 2  | Chr03: 2409493 - 2410991   | 1.8e-207 |
| GrWRKY7    | Gorai.009G276100 | 1065 | 354 | 2  | Chr09: 23139562 - 23141441 | 1.1e-234 |
| GrWRKY9-1  | Gorai.002G207600 | 1440 | 479 | 4  | Chr02: 55414404 - 55416230 | 0.0e+00  |
| GrWRKY9-2  | Gorai.008G041400 | 1518 | 505 | 4  | Chr08: 5422702 - 5424801   | 0.0e+00  |
| GrWRKY11-1 | Gorai.009G066900 | 993  | 330 | 2  | Chr09: 4768505 - 4770622   | 6.5e-222 |
| GrWRKY11-2 | Gorai.001G002200 | 1008 | 335 | 2  | Chr01: 190590 - 192301     | 7.7e-220 |
| GrWRKY12   | Gorai.008G201000 | 2559 | 852 | 13 | Chr08: 48660141 - 48668419 | 0.0e+00  |
| GrWRKY13-1 | Gorai.007G246500 | 669  | 222 | 2  | Chr07: 37935680 - 37941173 | 1.8e-155 |
| GrWRKY13-2 | Gorai.003G048100 | 648  | 215 | 2  | Chr03: 6528418 - 6530997   | 2.8e-150 |
| GrWRKY15   | Gorai.004G199500 | 879  | 292 | 3  | Chr04: 52091620 - 52094366 | 6.9e-198 |
| GrWRKY17   | Gorai.010G121800 | 1053 | 350 | 2  | Chr10: 24918506 - 24920740 | 4.9e-229 |
| GrWRKY18-1 | Gorai.009G062400 | 759  | 252 | 3  | Chr09: 4480963 - 4482542   | 4.3e-169 |
| GrWRKY18-2 | Gorai.001G037800 | 786  | 261 | 3  | Chr01: 3527619 - 3529351   | 1.9e-174 |
| GrWRKY20-1 | Gorai.002G096200 | 1707 | 568 | 5  | Chr02: 12157902 - 12162232 | 0.0e+00  |
| GrWRKY20-2 | Gorai.004G033200 | 1671 | 556 | 4  | Chr04: 2693188 - 2697619   | 0.0e+00  |
| GrWRKY20-3 | Gorai.013G155500 | 1686 | 561 | 5  | Chr13: 42910955 - 42915250 | 0.0e+00  |

|            |                  |      |      |    |                            |          |
|------------|------------------|------|------|----|----------------------------|----------|
| GrWRKY21-1 | Gorai.004G219300 | 963  | 320  | 2  | Chr04: 55302762 - 55305334 | 1.0e-217 |
| GrWRKY21-2 | Gorai.004G219400 | 972  | 323  | 2  | Chr04: 55312239 - 55314972 | 2.5e-217 |
| GrWRKY21-3 | Gorai.013G104500 | 996  | 331  | 3  | Chr13: 20662111 - 20665102 | 1.9e-225 |
| GrWRKY21-4 | Gorai.007G142800 | 1011 | 336  | 3  | Chr07: 11891564 - 11893955 | 3.2e-224 |
| GrWRKY21-5 | Gorai.008G200800 | 4023 | 1340 | 18 | Chr08: 48587929 - 48599304 | 0.0e+00  |
| GrWRKY22-1 | Gorai.004G160100 | 978  | 325  | 2  | Chr04: 44999954 - 45002111 | 2.5e-221 |
| GrWRKY22-2 | Gorai.007G122300 | 804  | 267  | 3  | Chr07: 9668171 - 9670097   | 4.1e-178 |
| GrWRKY22-3 | Gorai.007G103400 | 1008 | 335  | 2  | Chr07: 7762198 - 7764080   | 2.4e-223 |
| GrWRKY23-1 | Gorai.008G137900 | 960  | 319  | 2  | Chr08: 38795821 - 38797835 | 2.0e-217 |
| GrWRKY23-2 | Gorai.007G121200 | 939  | 312  | 2  | Chr07: 9561627 - 9563642   | 3.0e-211 |
| GrWRKY23-3 | Gorai.004G144900 | 867  | 288  | 2  | Chr04: 40803243 - 40804795 | 2.6e-197 |
| GrWRKY24-1 | Gorai.004G155100 | 597  | 198  | 1  | Chr04: 43990867 - 43992065 | 3.7e-135 |
| GrWRKY24-2 | Gorai.007G103600 | 570  | 189  | 1  | Chr07: 7770570 - 7772760   | 9.5e-128 |
| GrWRKY27-1 | Gorai.007G013300 | 1050 | 349  | 2  | Chr07: 1048354 - 1049982   | 6.8e-235 |
| GrWRKY27-2 | Gorai.008G273700 | 1191 | 396  | 2  | Chr08: 55234288 - 55236130 | 1.6e-267 |
| GrWRKY28-1 | Gorai.011G041400 | 945  | 314  | 2  | Chr11: 3079853 - 3081670   | 1.3e-212 |
| GrWRKY28-2 | Gorai.009G157300 | 960  | 319  | 2  | Chr09: 12048719 - 12050826 | 5.5e-219 |
| GrWRKY28-3 | Gorai.010G164700 | 831  | 276  | 2  | Chr10: 47672133 - 47673899 | 4.0e-191 |
| GrWRKY29-1 | Gorai.003G085500 | 840  | 279  | 2  | Chr03: 21690773 - 21692050 | 7.7e-191 |
| GrWRKY29-2 | Gorai.008G250300 | 900  | 299  | 2  | Chr08: 53423419 - 53424581 | 3.0e-207 |
| GrWRKY32-1 | Gorai.010G113000 | 1491 | 491  | 5  | Chr10: 21667464 - 21671276 | 0.0e+00  |
| GrWRKY32-2 | Gorai.001G032200 | 1509 | 502  | 4  | Chr01: 2983827 - 2987746   | 0.0e+00  |
| GrWRKY33-1 | Gorai.012G119600 | 1536 | 511  | 4  | Chr12: 27422106 - 27424439 | 0.0e+00  |
| GrWRKY33-2 | Gorai.003G150700 | 1722 | 573  | 4  | Chr03: 41825754 - 41828702 | 0.0e+00  |
| GrWRKY35-1 | Gorai.011G006600 | 1158 | 385  | 2  | Chr11: 524468 - 527564     | 1.1e-262 |
| GrWRKY35-2 | Gorai.009G116800 | 1386 | 461  | 3  | Chr09: 8576437 - 8580079   | 1.1e-312 |
| GrWRKY35-3 | Gorai.008G138900 | 717  | 238  | 3  | Chr08: 38956335 - 38958108 | 3.2e-161 |
| GrWRKY40-1 | Gorai.010G222400 | 981  | 326  | 3  | Chr10: 59312770 - 59314535 | 2.3e-207 |
| GrWRKY40-2 | Gorai.009G124000 | 933  | 310  | 4  | Chr09: 9269894 - 9271911   | 8.8e-203 |
| GrWRKY40-3 | Gorai.001G037700 | 918  | 305  | 4  | Chr01: 3501855 - 3503815   | 8.5e-204 |
| GrWRKY40-4 | Gorai.010G118300 | 939  | 312  | 4  | Chr10: 23470804 - 23472932 | 4.2e-209 |
| GrWRKY40-5 | Gorai.009G062300 | 942  | 313  | 4  | Chr09: 4477630 - 4479767   | 6.6e-204 |
| GrWRKY41-1 | Gorai.004G134600 | 1068 | 355  | 2  | Chr04: 36928943 - 36930774 | 8.5e-243 |

|            |                  |      |     |   |                            |          |
|------------|------------------|------|-----|---|----------------------------|----------|
| GrWRKY41-2 | Gorai.008G253300 | 1068 | 355 | 2 | Chr08: 53652234 - 53654501 | 4.1e-239 |
| GrWRKY42   | Gorai.010G182500 | 1656 | 551 | 4 | Chr10: 53223679 - 53226173 | 0.0e+00  |
| GrWRKY44   | Gorai.009G421200 | 1401 | 466 | 6 | Chr09: 65839443 - 65843032 | 2.0e-312 |
| GrWRKY45-1 | Gorai.012G085100 | 594  | 197 | 1 | Chr12: 14499483 - 14501846 | 8.3e-133 |
| GrWRKY45-2 | Gorai.001G057600 | 486  | 161 | 1 | Chr01: 5682018 - 5684119   | 3.3e-106 |
| GrWRKY46-1 | Gorai.007G107300 | 999  | 332 | 2 | Chr07: 8060718 - 8063303   | 2.2e-225 |
| GrWRKY46-2 | Gorai.001G155800 | 1008 | 335 | 3 | Chr01: 22002864 - 22004803 | 6.0e-227 |
| GrWRKY47-1 | Gorai.001G147900 | 1587 | 528 | 4 | Chr01: 20252418 - 20255849 | 0.0e+00  |
| GrWRKY47-2 | Gorai.007G117200 | 1518 | 505 | 4 | Chr07: 9168972 - 9172053   | 0.0e+00  |
| GrWRKY47-3 | Gorai.008G134300 | 1524 | 507 | 5 | Chr08: 38158827 - 38164045 | 0.0e+00  |
| GrWRKY48-1 | Gorai.005G068100 | 1074 | 357 | 3 | Chr05: 7292801 - 7295049   | 1.1e-245 |
| GrWRKY48-2 | Gorai.006G265200 | 879  | 292 | 2 | Chr06: 50418693 - 50420443 | 1.4e-198 |
| GrWRKY48-3 | Gorai.011G201800 | 1071 | 356 | 2 | Chr11: 48923571 - 48925654 | 9.4e-238 |
| GrWRKY49-1 | Gorai.012G104800 | 894  | 297 | 2 | Chr12: 23539684 - 23541270 | 1.4e-200 |
| GrWRKY49-2 | Gorai.006G171700 | 903  | 300 | 2 | Chr06: 43103488 - 43105647 | 1.2e-203 |
| GrWRKY50-1 | Gorai.010G098000 | 474  | 157 | 2 | Chr10: 17032215 - 17033572 | 7.5e-105 |
| GrWRKY50-2 | Gorai.001G021500 | 522  | 173 | 2 | Chr01: 2035562 - 2036973   | 5.8e-119 |
| GrWRKY51-1 | Gorai.003G047800 | 633  | 210 | 2 | Chr03: 6483440 - 6487119   | 2.7e-123 |
| GrWRKY51-2 | Gorai.007G245200 | 546  | 181 | 2 | Chr07: 36552367 - 36556177 | 2.7e-123 |
| GrWRKY51-3 | Gorai.011G114200 | 441  | 146 | 2 | Chr11: 14639253 - 14641404 | 1.9e-97  |
| GrWRKY51-4 | Gorai.010G131300 | 543  | 180 | 2 | Chr10: 28630558 - 28632381 | 2.7e-123 |
| GrWRKY51-5 | Gorai.009G259600 | 516  | 171 | 2 | Chr09: 21405533 - 21406771 | 4.3e-117 |
| GrWRKY53-1 | Gorai.007G014600 | 999  | 332 | 2 | Chr07: 1129337 - 1131192   | 1.5e-223 |
| GrWRKY53-2 | Gorai.008G270600 | 861  | 286 | 2 | Chr08: 54962950 - 54964147 | 1.3e-195 |
| GrWRKY54   | Gorai.013G008300 | 918  | 305 | 2 | Chr13: 556171 - 558759     | 1.6e-209 |
| GrWRKY55   | Gorai.012G014000 | 1122 | 373 | 2 | Chr12: 1570284 - 1572777   | 1.5e-254 |
| GrWRKY57-1 | Gorai.013G092300 | 927  | 308 | 4 | Chr13: 14878681 - 14885458 | 8.5e-207 |
| GrWRKY57-2 | Gorai.005G144500 | 900  | 299 | 3 | Chr05: 39141475 - 39145239 | 1.4e-201 |
| GrWRKY57-3 | Gorai.008G178100 | 930  | 309 | 3 | Chr08: 45484086 - 45491221 | 3.1e-210 |
| GrWRKY65-1 | Gorai.010G161000 | 831  | 276 | 2 | Chr10: 45946955 - 45948589 | 2.2e-185 |
| GrWRKY65-2 | Gorai.009G160800 | 834  | 277 | 2 | Chr09: 12340497 - 12342145 | 9.7e-185 |
| GrWRKY69   | Gorai.011G037500 | 825  | 274 | 2 | Chr11: 2807773 - 2809365   | 8.1e-182 |
| GrWRKY70-1 | Gorai.009G292600 | 918  | 305 | 2 | Chr09: 25326109 - 25327589 | 5.1e-207 |

|                            |                  |      |      |   |                                |          |
|----------------------------|------------------|------|------|---|--------------------------------|----------|
| GrWRKY70-2                 | Gorai.012G013900 | 909  | 302  | 2 | Chr12: 1557156 - 1558483       | 2.9e-211 |
| GrWRKY70-3                 | Gorai.010G219200 | 984  | 327  | 2 | Chr10: 58811633 - 58814117     | 4.3e-223 |
| GrWRKY70-4                 | Gorai.005G003900 | 924  | 307  | 2 | Chr05: 216589 - 219052         | 1.2e-205 |
| GrWRKY71-1                 | Gorai.006G008200 | 906  | 301  | 2 | Chr06: 1694301 - 1696794       | 5.4e-202 |
| GrWRKY71-2                 | Gorai.012G040700 | 957  | 318  | 2 | Chr12: 5025230 - 5027054       | 4.4e-216 |
| GrWRKY72-1                 | Gorai.013G082300 | 1458 | 485  | 2 | Chr13: 11310159 - 11313327     | 0.0e+00  |
| GrWRKY72-2                 | Gorai.008G191200 | 1824 | 607  | 5 | Chr08: 47423917 - 47427268     | 0.0e+00  |
| GrWRKY72-3                 | Gorai.012G056800 | 1665 | 554  | 4 | Chr12: 7726941 - 7729440       | 0.0e+00  |
| GrWRKY72-4                 | Gorai.006G025700 | 1503 | 500  | 3 | Chr06: 6506690 - 6509020       | 0.0e+00  |
| GrWRKY74-1                 | Gorai.004G247000 | 1002 | 333  | 2 | Chr04: 58396398 - 58398829     | 1.5e-225 |
| GrWRKY74-2                 | Gorai.007G278400 | 981  | 326  | 2 | Chr07: 47621852 - 47623805     | 3.5e-219 |
| GrWRKY75-1                 | Gorai.002G181600 | 453  | 150  | 1 | Chr02: 47717326 - 47718427     | 2.2e-99  |
| GrWRKY75-2                 | Gorai.005G164300 | 543  | 180  | 1 | Chr05: 47752588 - 47754653     | 2.2e-118 |
| GrWRKY75-3                 | Gorai.011G086300 | 498  | 165  | 1 | Chr11: 8976191 - 8976914       | 5.1e-110 |
| GrWRKY75-4                 | Gorai.001G273100 | 501  | 166  | 1 | Chr01: 54991732 - 54993814     | 1.4e-110 |
| GrWRKY75-5                 | Gorai.006G043200 | 477  | 158  | 1 | Chr06: 12551443 - 12553732     | 1.8e-107 |
| <i>Linum usitatissimum</i> |                  |      |      |   |                                |          |
| LuWRKY1-1                  | Lus10006368.g    | 1521 | 506  | 3 | scaffold1603: 52507 - 54326    | 3.0e-134 |
| LuWRKY1-2                  | Lus10012322.g    | 1215 | 404  | 3 | scaffold572: 127645 - 129160   | 2.5e-118 |
| LuWRKY2-1                  | Lus10020215.g    | 1656 | 551  | 2 | scaffold454: 660146 - 662154   | 5.9e-172 |
| LuWRKY2-2                  | Lus10026838.g    | 2121 | 706  | 4 | scaffold651: 66042 - 69780     | 1.2e-223 |
| LuWRKY3-1                  | Lus10000173.g    | 966  | 321  | 3 | C8365651: 13 - 1492            | 2.2e-116 |
| LuWRKY3-2                  | Lus10036800.g    | 1290 | 429  | 3 | scaffold31: 683634 - 685437    | 5.5e-131 |
| LuWRKY3-3                  | Lus10037131.g    | 1290 | 429  | 3 | scaffold462: 325462 - 327216   | 4.6e-134 |
| LuWRKY3-4                  | Lus10012029.g    | 1386 | 461  | 3 | scaffold931: 236215 - 238268   | 2.9e-46  |
| LuWRKY3-5                  | Lus10012030.g    | 3597 | 1198 | 9 | scaffold931: 239236 - 244342   | 6.1e-120 |
| LuWRKY3-6                  | Lus10016282.g    | 3534 | 1177 | 9 | scaffold947: 600805 - 605914   | 1.6e-112 |
| LuWRKY3-7                  | Lus10012027.g    | 2850 | 949  | 9 | scaffold931: 228831 - 233267   | 2.2e-143 |
| LuWRKY4-1                  | Lus10030424.g    | 1371 | 456  | 3 | scaffold917: 64180 - 66112     | 1.3e-135 |
| LuWRKY4-2                  | Lus10026634.g    | 1326 | 441  | 3 | scaffold617: 764017 - 765881   | 3.2e-134 |
| LuWRKY5                    | Lus10012678.g    | 948  | 327  | 3 | scaffold206: 8356 - 19449      | 6.5e-54  |
| LuWRKY6-1                  | Lus10035286.g    | 1641 | 546  | 4 | scaffold151: 64617 - 67212     | 4.1e-149 |
| LuWRKY6-2                  | Lus10030040.g    | 1845 | 614  | 4 | scaffold416: 1190676 - 1193392 | 8.4e-114 |

|            |               |      |     |   |                               |          |
|------------|---------------|------|-----|---|-------------------------------|----------|
| LuWRKY7    | Lus10010053.g | 1035 | 344 | 2 | scaffold621: 251285 - 252496  | 1.2e-124 |
| LuWRKY9-1  | Lus10035971.g | 1332 | 443 | 4 | scaffold76: 505514 - 507425   | 3.7e-72  |
| LuWRKY9-2  | Lus10016682.g | 1419 | 472 | 4 | scaffold903: 2155 - 4199      | 1.6e-61  |
| LuWRKY10   | Lus10007326.g | 804  | 267 | 1 | scaffold302: 8668 - 10627     | 4.2e-32  |
| LuWRKY11   | Lus10020136.g | 978  | 325 | 2 | scaffold454: 229747 - 231386  | 1.0e-148 |
| LuWRKY13   | Lus10020832.g | 798  | 265 | 2 | scaffold711: 113031 - 118623  | 8.1e-54  |
| LuWRKY15-1 | Lus10041600.g | 1044 | 347 | 2 | scaffold272: 863959 - 865252  | 6.8e-134 |
| LuWRKY15-2 | Lus10006261.g | 1047 | 348 | 2 | scaffold535: 180482 - 181774  | 6.0e-134 |
| LuWRKY17-1 | Lus10005428.g | 729  | 242 | 2 | scaffold847: 91419 - 92992    | 3.4e-79  |
| LuWRKY17-2 | Lus10015229.g | 798  | 265 | 2 | scaffold924: 55542 - 57259    | 5.5e-77  |
| LuWRKY17-3 | Lus10026936.g | 1011 | 336 | 2 | scaffold651: 654889 - 656616  | 4.0e-152 |
| LuWRKY20-1 | Lus10016595.g | 1686 | 561 | 5 | scaffold915: 125806 - 129807  | 1.3e-237 |
| LuWRKY20-2 | Lus10003769.g | 1797 | 598 | 4 | scaffold566: 65332 - 69224    | 8.8e-227 |
| LuWRKY20-3 | Lus10032580.g | 1185 | 394 | 3 | scaffold140: 846806 - 849016  | 2.3e-137 |
| LuWRKY20-4 | Lus10043167.g | 1572 | 523 | 5 | scaffold25: 1539592 - 1543223 | 3.0e-184 |
| LuWRKY21-1 | Lus10014745.g | 1071 | 356 | 2 | scaffold584: 470023 - 471587  | 3.4e-170 |
| LuWRKY21-2 | Lus10033857.g | 1068 | 355 | 2 | scaffold222: 636777 - 638353  | 2.1e-168 |
| LuWRKY21-3 | Lus10018776.g | 1008 | 335 | 2 | scaffold461: 674915 - 676405  | 9.4e-136 |
| LuWRKY21-4 | Lus10024864.g | 996  | 331 | 2 | scaffold473: 458232 - 459707  | 8.5e-138 |
| LuWRKY22-1 | Lus10007907.g | 1116 | 371 | 2 | scaffold1317: 220425 - 221721 | 5.6e-87  |
| LuWRKY22-2 | Lus10036399.g | 738  | 245 | 2 | scaffold57: 489278 - 490202   | 4.6e-70  |
| LuWRKY22-3 | Lus10018815.g | 1554 | 517 | 2 | scaffold103: 2658 - 4496      | 1.4e-47  |
| LuWRKY22-4 | Lus10005132.g | 393  | 130 | 0 | scaffold846: 217286 - 217678  | 1.4e-15  |
| LuWRKY26-1 | Lus10012215.g | 1641 | 546 | 4 | scaffold273: 33449 - 35852    | 1.1e-182 |
| LuWRKY26-2 | Lus10001265.g | 1557 | 518 | 4 | scaffold352: 61863 - 64300    | 1.1e-180 |
| LuWRKY27-1 | Lus10024676.g | 813  | 270 | 1 | scaffold349: 723578 - 725166  | 9.5e-56  |
| LuWRKY27-2 | Lus10032303.g | 891  | 296 | 1 | scaffold291: 638036 - 639613  | 4.5e-60  |
| LuWRKY29-1 | Lus10027538.g | 1239 | 412 | 2 | scaffold96: 846700 - 848690   | 1.1e-71  |
| LuWRKY29-2 | Lus10039295.g | 1005 | 334 | 2 | scaffold33: 386387 - 388263   | 1.3e-64  |
| LuWRKY30-1 | Lus10001062.g | 1056 | 351 | 2 | scaffold1286: 38285 - 39851   | 6.5e-68  |
| LuWRKY30-2 | Lus10039331.g | 1095 | 364 | 2 | scaffold33: 601835 - 603987   | 2.9e-72  |
| LuWRKY32-1 | Lus10036268.g | 1641 | 546 | 4 | scaffold27: 646378 - 649748   | 4.0e-154 |
| LuWRKY32-2 | Lus10022150.g | 1638 | 545 | 4 | scaffold342: 149803 - 153178  | 6.4e-153 |

|            |               |      |     |   |                                |          |
|------------|---------------|------|-----|---|--------------------------------|----------|
| LuWRKY33-1 | Lus10042243.g | 1470 | 489 | 3 | scaffold123: 1371062 - 1373109 | 1.3e-167 |
| LuWRKY33-2 | Lus10026409.g | 633  | 210 | 1 | scaffold898: 992906 - 993891   | 4.4e-93  |
| LuWRKY33-3 | Lus10022278.g | 246  | 81  | 0 | scaffold225: 517284 - 517529   | 1.1e-58  |
| LuWRKY34-1 | Lus10027139.g | 2154 | 717 | 4 | scaffold297: 1054688 - 1057345 | 5.0e-283 |
| LuWRKY34-2 | Lus10032887.g | 2154 | 717 | 4 | scaffold51: 35260 - 37924      | 1.5e-284 |
| LuWRKY35   | Lus10038426.g | 885  | 294 | 2 | scaffold28: 1265768 - 1268401  | 2.1e-84  |
| LuWRKY36-1 | Lus10037205.g | 1431 | 476 | 2 | scaffold462: 752584 - 754753   | 1.0e-93  |
| LuWRKY36-2 | Lus10036725.g | 1446 | 481 | 2 | scaffold31: 259503 - 261843    | 1.2e-95  |
| LuWRKY39   | Lus10021999.g | 948  | 315 | 2 | scaffold87: 224294 - 225588    | 6.1e-97  |
| LuWRKY40-1 | Lus10024074.g | 1077 | 358 | 3 | scaffold353: 394443 - 395811   | 1.7e-108 |
| LuWRKY40-2 | Lus10041660.g | 1089 | 362 | 3 | scaffold272: 1143406 - 1144792 | 1.4e-104 |
| LuWRKY40-3 | Lus10026082.g | 1062 | 353 | 3 | scaffold319: 613216 - 614689   | 1.3e-95  |
| LuWRKY40-4 | Lus10002309.g | 1059 | 352 | 3 | scaffold120: 38671 - 40247     | 2.4e-97  |
| LuWRKY41-1 | Lus10003894.g | 966  | 321 | 2 | scaffold254: 98824 - 99948     | 1.5e-95  |
| LuWRKY41-2 | Lus10001902.g | 975  | 324 | 2 | scaffold255: 35388 - 36525     | 1.2e-99  |
| LuWRKY42-1 | Lus10022959.g | 1644 | 547 | 4 | scaffold355: 304446 - 307009   | 7.2e-109 |
| LuWRKY42-2 | Lus10021554.g | 1698 | 565 | 3 | scaffold362: 756559 - 761238   | 1.7e-104 |
| LuWRKY42-3 | Lus10015546.g | 1062 | 353 | 1 | scaffold860: 497500 - 498692   | 4.1e-79  |
| LuWRKY43-1 | Lus10007906.g | 669  | 222 | 1 | scaffold1317: 212017 - 214482  | 2.2e-69  |
| LuWRKY43-2 | Lus10036401.g | 648  | 215 | 1 | scaffold57: 497491 - 499055    | 1.6e-70  |
| LuWRKY44   | Lus10019898.g | 1263 | 420 | 6 | scaffold1491: 565522 - 568464  | 1.6e-95  |
| LuWRKY47-1 | Lus10038028.g | 1332 | 443 | 4 | scaffold475: 930490 - 933471   | 4.6e-88  |
| LuWRKY47-2 | Lus10009969.g | 627  | 208 | 1 | scaffold1630: 41523 - 42774    | 2.3e-67  |
| LuWRKY48-1 | Lus10037785.g | 1086 | 361 | 2 | scaffold196: 1563871 - 1565325 | 3.9e-88  |
| LuWRKY48-2 | Lus10017067.g | 1080 | 359 | 2 | scaffold216: 45324 - 46783     | 1.4e-85  |
| LuWRKY49-1 | Lus10010851.g | 693  | 230 | 2 | scaffold440: 202315 - 203217   | 3.2e-54  |
| LuWRKY49-2 | Lus10024380.g | 831  | 276 | 2 | scaffold16: 599062 - 600091    | 1.2e-61  |
| LuWRKY50   | Lus10006848.g | 741  | 246 | 2 | scaffold1356: 94321 - 95261    | 3.3e-55  |
| LuWRKY51-1 | Lus10035841.g | 663  | 220 | 2 | scaffold464: 1579044 - 1580019 | 1.4e-45  |
| LuWRKY51-2 | Lus10036624.g | 642  | 213 | 2 | scaffold57: 1512688 - 1513791  | 1.9e-50  |
| LuWRKY53-1 | Lus10032372.g | 1080 | 359 | 2 | scaffold291: 969635 - 970903   | 2.5e-126 |
| LuWRKY53-2 | Lus10023099.g | 1089 | 362 | 2 | scaffold325: 379977 - 381261   | 3.5e-123 |
| LuWRKY54-1 | Lus10014177.g | 906  | 301 | 1 | scaffold231: 280648 - 282205   | 2.3e-41  |

|                        |               |      |     |   |                                     |          |
|------------------------|---------------|------|-----|---|-------------------------------------|----------|
| LuWRKY54-2             | Lus10022736.g | 894  | 297 | 1 | scaffold59: 702778 - 704104         | 1.6e-35  |
| LuWRKY54-3             | Lus10030517.g | 951  | 316 | 2 | scaffold917: 531187 - 532493        | 7.0e-45  |
| LuWRKY54-4             | Lus10012870.g | 924  | 307 | 2 | scaffold1313: 273878 - 275141       | 8.3e-44  |
| LuWRKY55               | Lus10029022.g | 771  | 256 | 2 | scaffold376: 128139 - 130867        | 3.3e-58  |
| LuWRKY57-1             | Lus10036891.g | 1053 | 350 | 2 | scaffold31: 1105718 - 1110475       | 4.8e-81  |
| LuWRKY57-2             | Lus10037094.g | 1065 | 354 | 2 | scaffold462: 182308 - 186177        | 2.9e-80  |
| LuWRKY58-1             | Lus10033000.g | 1569 | 522 | 3 | scaffold51: 1026515 - 1029919       | 1.6e-193 |
| LuWRKY58-2             | Lus10015377.g | 1617 | 538 | 3 | scaffold635: 207217 - 210613        | 2.6e-217 |
| LuWRKY61               | Lus10023615.g | 1086 | 561 | 2 | scaffold505: 169590 - 171705        | 8.0e-94  |
| LuWRKY65-1             | Lus10029252.g | 735  | 244 | 2 | scaffold360: 247939 - 249537        | 2.6e-63  |
| LuWRKY65-2             | Lus10007305.g | 579  | 192 | 2 | scaffold859: 180772 - 182205        | 3.0e-64  |
| LuWRKY70-1             | Lus10029021.g | 882  | 293 | 2 | scaffold376: 124994 - 127131        | 1.1e-51  |
| LuWRKY70-2             | Lus10034244.g | 882  | 293 | 2 | scaffold310: 226693 - 228086        | 1.6e-53  |
| LuWRKY70-3             | Lus10025216.g | 1002 | 333 | 1 | scaffold339: 28914 - 31054          | 2.3e-53  |
| LuWRKY70-4             | Lus10025133.g | 966  | 321 | 1 | scaffold305: 441610 - 443615        | 3.2e-53  |
| LuWRKY71-1             | Lus10004612.g | 930  | 309 | 1 | scaffold1170: 176700 - 178433       | 6.3e-77  |
| LuWRKY71-2             | Lus10004537.g | 846  | 281 | 1 | scaffold48: 15521 - 17335           | 6.5e-79  |
| LuWRKY72               | Lus10024246.g | 2355 | 784 | 5 | scaffold165: 704003 - 709151        | 6.0e-104 |
| LuWRKY74               | Lus10042538.g | 936  | 311 | 2 | scaffold67: 206729 - 208018         | 1.3e-96  |
| LuWRKY75-1             | Lus10011346.g | 495  | 164 | 1 | scaffold744: 89855 - 91916          | 3.2e-58  |
| LuWRKY75-2             | Lus10003128.g | 480  | 159 | 1 | scaffold1847: 55599 - 57808         | 3.4e-59  |
| LuWRKY75-3             | Lus10012547.g | 357  | 118 | 1 | scaffold6: 241387 - 244335          | 2.6e-59  |
| LuWRKY75-4             | Lus10041546.g | 621  | 206 | 1 | scaffold272: 628883 - 630242        | 3.2e-61  |
| <i>Malus domestica</i> |               |      |     |   |                                     |          |
| MdWRKY1-1              | MDP0000256105 | 1455 | 484 | 3 | Chr9: MDC002626.191: 15548 - 17594  | 5.4e-229 |
| MdWRKY1-2              | MDP0000260803 | 1458 | 485 | 3 | Chr17: MDC017641.109: 702 - 3071    | 4.6e-209 |
| MdWRKY2-1              | MDP0000144203 | 2181 | 726 | 4 | Chr4: MDC021803.105: 6499 - 9863    | 0.0e+00  |
| MdWRKY2-2              | MDP0000184044 | 2898 | 965 | 7 | Chr12: MDC008173.377: 8987 - 14024  | 0.0e+00  |
| MdWRKY3-1              | MDP0000708692 | 1563 | 520 | 4 | Chr4: MDC017895.316: 14103 - 16075  | 0.0e+00  |
| MdWRKY3-2              | MDP0000258212 | 1689 | 562 | 4 | Chr16: MDC010756.337: 9879 - 12269  | 1.1e-257 |
| MdWRKY4                | MDP0000125782 | 1311 | 436 | 1 | Chr13: MDC010756.328: 57371 - 59642 | 4.1e-209 |
| MdWRKY6                | MDP0000301666 | 1890 | 629 | 5 | Chr5: MDC015642.226: 3597 - 6162    | 0.0e+00  |
| MdWRKY7                | MDP0000129882 | 1056 | 351 | 2 | Chr8: MDC017495.204: 3145 - 4808    | 1.6e-171 |

|            |               |      |      |    |                                     |          |
|------------|---------------|------|------|----|-------------------------------------|----------|
| MdWRKY9-1  | MDP0000179719 | 1719 | 572  | 4  | Chr8: MDC007295.376: 5455 - 7851    | 6.4e-212 |
| MdWRKY9-2  | MDP0000137704 | 1821 | 606  | 7  | Chr15: MDC005436.516: 4056 - 8281   | 1.1e-204 |
| MdWRKY11-1 | MDP0000130400 | 843  | 280  | 2  | Unanch: MDC018338.206: 12128 -13229 | 5.8e-186 |
| MdWRKY11-2 | MDP0000716551 | 1149 | 382  | 3  | Chr8: MDC011219.436: 764 - 3783     | 1.2e-222 |
| MdWRKY11-3 | MDP0000200748 | 495  | 164  | 2  | Chr15: MDC013859.580: 2376 - 4634   | 2.5e-47  |
| MdWRKY11-4 | MDP0000185288 | 1026 | 341  | 2  | Chr8: MDC011219.444: 11643 - 13146  | 6.3e-223 |
| MdWRKY11-5 | MDP0000272940 | 1017 | 338  | 2  | Chr15: MDC004030.356: 5510 - 7048   | 1.4e-201 |
| MdWRKY11-6 | MDP0000381897 | 306  | 101  | 2  | Chr15: MDC015490.71: 287 - 1652     | 3.3e-42  |
| MdWRKY11-7 | MDP0000184308 | 1278 | 425  | 3  | Unanch: MDC008403.468: 4880 - 6990  | 1.1e-42  |
| MdWRKY13-1 | MDP0000259279 | 813  | 270  | 2  | Chr8: MDC009195.339: 1419 - 4941    | 3.3e-187 |
| MdWRKY13-2 | MDP0000176224 | 963  | 320  | 5  | Chr14: MDC006681.275: 14834 - 19349 | 6.0e-153 |
| MdWRKY13-3 | MDP0000517924 | 357  | 118  | 2  | Chr2: MDC008679.195: 521 - 8016     | 1.1e-34  |
| MdWRKY14   | MDP0000566005 | 1614 | 537  | 4  | Chr10: MDC010643.143: 15821 - 26034 | 2.5e-220 |
| MdWRKY15-1 | MDP0000231668 | 1029 | 342  | 2  | Chr15: MDC015663.88: 14239 - 15750  | 1.8e-162 |
| MdWRKY15-2 | MDP0000946614 | 846  | 281  | 2  | Chr3: MDC025970.13: 5867 - 6933     | 2.0e-156 |
| MdWRKY18   | MDP0000418900 | 477  | 158  | 1  | Chr9: MDC000374.165: 15658 - 16205  | 7.4e-82  |
| MdWRKY20-1 | MDP0000294643 | 1029 | 342  | 2  | Unanch: MDC013694.186: 527 - 3119   | 7.3e-175 |
| MdWRKY20-2 | MDP0000700887 | 564  | 187  | 0  | Chr17: MDC017580.221: 10577 - 11140 | 3.0e-94  |
| MdWRKY20-3 | MDP0000184361 | 2079 | 692  | 9  | Chr17: MDC007214.348: 13143 - 18505 | 0.0e+00  |
| MdWRKY20-4 | MDP0000289397 | 1851 | 616  | 6  | Chr11: MDC010860.364: 12978 - 17093 | 0.0e+00  |
| MdWRKY20-5 |               |      |      |    |                                     | 4.4e-205 |
| MdWRKY21-1 | MDP0000322257 | 2892 | 963  | 7  | Chr6: MDC014216.250: 6886 - 12974   | 1.1e-249 |
| MdWRKY21-2 | MDP0000281965 | 1314 | 437  | 5  | Chr10: MDC006536.318: 58151 - 61410 | 4.9e-228 |
| MdWRKY22-1 | MDP0000602139 | 1020 | 339  | 2  | Chr1: MDC004965.191: 448 - 1728     | 1.3e-149 |
| MdWRKY22-2 | MDP0000909869 | 1047 | 348  | 2  | Chr7: MDC010007.148: 5940 - 7212    | 1.2e-157 |
| MdWRKY23-1 | MDP0000657441 | 1155 | 384  | 3  | Chr17: MDC016387.187: 17247 - 28445 | 5.2e-187 |
| MdWRKY23-2 | MDP0000127976 | 1053 | 350  | 2  | Chr9: MDC013713.363: 12874 - 14316  | 4.0e-230 |
| MdWRKY23-3 | MDP0000652760 | 558  | 186  | 1  | Chr9: MDC005142.216: 258 - 984      | 2.0e-119 |
| MdWRKY23-4 | MDP0000134105 | 1053 | 350  | 2  | Chr9: MDC043608.9: 3250 - 4693      | 1.6e-229 |
| MdWRKY24   | MDP0000319700 | 4734 | 1577 | 13 | Chr1: MDC004623.338: 5710 - 23201   | 0.0e+00  |
| MdWRKY25   | MDP0000849514 | 1581 | 526  | 3  | Chr13: MDC001533.397: 54381 - 57091 | 1.8e-257 |
| MdWRKY26   | MDP0000648338 | 2202 | 733  | 4  | Chr3: MDC010276.213: 1385 - 4453    | 0.0e+00  |
| MdWRKY27-1 | MDP0000294526 | 1821 | 606  | 3  | Chr1: MDC012574.173: 12862 - 15231  | 1.9e-131 |



|            |               |      |     |   |                                      |          |
|------------|---------------|------|-----|---|--------------------------------------|----------|
| MdWRKY27-2 | MDP0000135668 | 1302 | 433 | 2 | Chr7: MDC001868.399: 37519 - 39078   | 5.5e-120 |
| MdWRKY28-1 | MDP0000118810 | 960  | 319 | 2 | Chr5: MDC000149.363: 8502 - 10189    | 6.4e-143 |
| MdWRKY28-2 | MDP0000119590 | 984  | 327 | 2 | Chr10: MDC001276.321: 20168 - 21851  | 4.2e-149 |
| MdWRKY29-1 | MDP0000247896 | 951  | 316 | 1 | Chr7: MDC002450.221: 7666 - 9027     | 8.4e-125 |
| MdWRKY29-2 | MDP0000145953 | 765  | 254 | 1 | Chr2: MDC002450.233: 5350 - 6613     | 2.2e-108 |
| MdWRKY30-1 | MDP0000455180 | 1044 | 347 | 2 | Chr1: MDC004961.346: 7359 - 9364     | 8.2e-230 |
| MdWRKY30-2 | MDP0000191017 | 1071 | 356 | 2 | Chr7: MDC010509.242: 9638 - 11856    | 1.6e-233 |
| MdWRKY30-3 | MDP0000727570 | 1044 | 347 | 2 | Chr1: MDC016134.91: 5469 - 7475      | 8.2e-230 |
| MdWRKY31   | MDP0000263961 | 1059 | 352 | 6 | Chr8: MDC000897.321: 208 - 4647      | 6.0e-83  |
| MdWRKY32-1 | MDP0000131218 | 1452 | 483 | 4 | Chr15: MDC019618.62: 6578 - 9907     | 1.1e-248 |
| MdWRKY32-2 | MDP0000293456 | 1434 | 477 | 4 | Chr2: MDC015165.59: 3226 - 6251      | 4.4e-234 |
| MdWRKY33-1 | MDP0000514115 | 1716 | 571 | 4 | Chr3: MDC031925.10: 2839 - 5383      | 0.0e+00  |
| MdWRKY33-2 | MDP0000296025 | 1539 | 512 | 4 | Chr12: MDC013913.203: 6056 - 8016    | 0.0e+00  |
| MdWRKY33-3 | MDP0000195385 | 1530 | 509 | 4 | Chr12: MDC013913.134: 1721 - 3683    | 6.8e-309 |
| MdWRKY33-4 | MDP0000507805 | 1395 | 464 | 4 | Chr3: MDC005987.255: 1605 - 3823     | 9.1e-312 |
| MdWRKY33-5 | MDP0000935996 | 1719 | 572 | 4 | Chr11: MDC004410.707: 32932 - 35500  | 0.0e+00  |
| MdWRKY34   | MDP0000431358 | 2202 | 733 | 4 | Chr3: MDC010276.288: 1035 - 4100     | 0.0e+00  |
| MdWRKY35-1 | MDP0000168871 | 1449 | 482 | 2 | Chr14: MDC005368.121: 11847 - 16381  | 7.4e-215 |
| MdWRKY35-2 | MDP0000202292 | 807  | 268 | 2 | Chr11: MDC013433.236: 57726 - 59087  | 3.7e-174 |
| MdWRKY35-3 | MDP0000294489 | 783  | 260 | 2 | Chr3: MDC012992.425: 7822 - 9169     | 5.0e-139 |
| MdWRKY36   | MDP0000228838 | 837  | 278 | 3 | Chr8: MDC026664.26: 3063 - 4394      | 1.4e-83  |
| MdWRKY40-1 | MDP0000177906 | 966  | 321 | 4 | Chr17: MDC007908.251: 16040 - 17803  | 4.4e-205 |
| MdWRKY40-2 | MDP0000794439 | 963  | 320 | 4 | Chr14: MDC018238.148: 9566 - 11266   | 5.3e-183 |
| MdWRKY40-3 | MDP0000307516 | 1005 | 334 | 4 | Chr8: MDC017768.324: 6325 - 8169     | 4.5e-221 |
| MdWRKY41-1 | MDP0000468391 | 1044 | 347 | 2 | Chr1: MDC010557.340: 14408 - 15940   | 1.1e-158 |
| MdWRKY41-2 | MDP0000299114 | 1056 | 351 | 2 | Chr1: MDC015340.297: 16390 - 17961   | 7.8e-155 |
| MdWRKY41-3 | MDP0000146360 | 1056 | 351 | 2 | Chr1: MDC000896.238: 3076 - 4647     | 7.8e-155 |
| MdWRKY41-4 | MDP0000767097 | 1029 | 342 | 2 | Chr7: MDC019500.163: 20847 - 22392   | 6.6e-149 |
| MdWRKY41-5 | MDP0000315045 | 1068 | 355 | 2 | Unanch: MDC022185.237: 26011 - 27819 | 4.5e-150 |
| MdWRKY41-6 | MDP0000219647 | 1044 | 347 | 2 | Chr1: MDC019500.121: 805 - 2337      | 1.1e-158 |
| MdWRKY42   | MDP0000935652 | 1836 | 611 | 5 | Chr10: MDC010173.125: 37712 - 40213  | 0.0e+00  |
| MdWRKY43-1 | MDP0000119031 | 669  | 222 | 1 | Chr7: MDC000480.230: 1775 - 3275     | 2.1e-80  |
| MdWRKY43-2 | MDP0000228328 | 669  | 222 | 1 | Chr7: MDC025197.34: 350 - 1850       | 2.1e-80  |

|            |               |      |     |   |                                     |          |
|------------|---------------|------|-----|---|-------------------------------------|----------|
| MdWRKY43-3 | MDP0000288378 | 1020 | 339 | 5 | Chr1: MDC011074.351: 2492 - 8514    | 8.7e-61  |
| MdWRKY43-4 | MDP0000241967 | 597  | 198 | 3 | Chr1: MDC013240.189: 360 - 3733     | 2.2e-32  |
| MdWRKY44-1 | MDP0000169621 | 1416 | 471 | 4 | Chr4: MDC004911.314: 16053 - 18330  | 2.3e-312 |
| MdWRKY44-2 | MDP0000268364 | 1413 | 470 | 4 | Chr12: MDC000739.241: 8358 - 11295  | 6.7e-274 |
| MdWRKY44-3 | MDP0000598428 | 243  | 80  | 1 | Chr5: MDC011122.248: 3936 - 4591    | 2.5e-58  |
| MdWRKY44-4 | MDP0000788581 | 441  | 146 | 1 | Chr4: MDC006671.459: 1958 - 2799    | 9.5e-148 |
| MdWRKY45-1 | MDP0000836661 | 453  | 150 | 1 | Chr6: MDC000005.468: 2938 - 3715    | 6.7e-55  |
| MdWRKY45-2 | MDP0000263900 | 408  | 135 | 1 | Chr14: MDC001963.416: 5302 - 6051   | 2.2e-52  |
| MdWRKY47   | MDP0000263349 | 861  | 286 | 3 | Chr1: MDC006277.244: 24504 - 26011  | 4.7e-84  |
| MdWRKY48-1 | MDP0000256514 | 1116 | 371 | 2 | Chr16: MDC002916.99: 7457 - 9143    | 3.9e-207 |
| MdWRKY48-2 | MDP0000146390 | 1158 | 385 | 2 | Chr13: MDC003788.288: 27928 - 29658 | 4.9e-255 |
| MdWRKY49-1 | MDP0000205962 | 891  | 297 | 2 | Chr12: MDC016775.152: 1568 - 3459   | 2.4e-153 |
| MdWRKY49-2 | MDP0000215371 | 948  | 315 | 3 | Chr4: MDC016775.162: 8241 - 10132   | 6.0e-151 |
| MdWRKY50-1 | MDP0000480547 | 768  | 255 | 4 | Chr8: MDC022670.164: 6713 - 11639   | 9.9e-51  |
| MdWRKY50-2 | MDP0000121669 | 486  | 161 | 2 | Chr6: MDC004691.361: 1254 - 2110    | 9.6e-58  |
| MdWRKY50-3 | MDP0000299555 | 759  | 252 | 6 | Chr8: MDC014225.232: 5563 - 7509    | 4.1e-37  |
| MdWRKY51   | MDP0000253189 | 654  | 217 | 3 | Chr17: MDC033588.6: 680 - 4284      | 2.8e-69  |
| MdWRKY54   | MDP0000460139 | 1035 | 344 | 2 | Chr12: MDC007698.491: 6619 - 9223   | 2.1e-140 |
| MdWRKY55   | MDP0000828055 | 1029 | 342 | 2 | Chr4: MDC035519.7: 14033 - 16185    | 1.2e-134 |
| MdWRKY56   | MDP0000756254 | 192  | 63  | 1 | Chr1: MDC013411.132: 2593 - 2878    | 7.4e-38  |
| MdWRKY57-1 | MDP0000707539 | 741  | 246 | 2 | Chr16: MDC021902.108: 14699 - 17114 | 1.6e-113 |
| MdWRKY57-2 | MDP0000193216 | 1197 | 398 | 3 | Chr13: MDC010585.196: 20669 - 23938 | 1.3e-133 |
| MdWRKY58   | MDP0000179145 | 1587 | 528 | 3 | Chr9: MDC008132.471: 25217 - 28758  | 0.0e+00  |
| MdWRKY60   | MDP0000689162 | 912  | 303 | 3 | Chr1: MDC006277.244: 9521 - 10969   | 3.4e-160 |
| MdWRKY61-1 | MDP0000290374 | 1365 | 455 | 3 | Chr17: MDC008814.323: 30424 - 32679 | 7.9e-173 |
| MdWRKY61-2 | MDP0000757476 | 135  | 44  | 1 | Chr15: MDC016408.252: 7302 - 7710   | 9.1e-29  |
| MdWRKY61-3 | MDP0000273851 | 1731 | 576 | 3 | Chr13: MDC004746.122: 2816 - 6582   | 4.9e-218 |
| MdWRKY64   | MDP0000128463 | 993  | 330 | 2 | Chr2: MDC015181.101: 1734 - 2965    | 2.4e-214 |
| MdWRKY65-1 | MDP0000133918 | 801  | 266 | 2 | Chr10: MDC037719.8: 4105 - 5329     | 6.0e-176 |
| MdWRKY65-2 | MDP0000304113 | 822  | 273 | 2 | Chr5: MDC015524.135: 6399 - 7605    | 1.4e-149 |
| MdWRKY67   | MDP0000128464 | 1029 | 342 | 1 | Chr17: MDC015186.45: 193 - 2000     | 4.4e-205 |
| MdWRKY69   | MDP0000676216 | 1065 | 354 | 4 | Chr9: MDC013104.664: 2624 - 9198    | 8.5e-108 |
| MdWRKY70-1 | MDP0000754989 | 1368 | 455 | 4 | Chr12: MDC042136.8: 7167 - 15527    | 1.5e-102 |

|                          |                      |      |     |   |                                     |          |
|--------------------------|----------------------|------|-----|---|-------------------------------------|----------|
| MdWRKY70-2               | MDP0000228304        | 1089 | 362 | 4 | Chr4: MDC035519.7: 9735 - 13107     | 6.2e-104 |
| MdWRKY70-3               | MDP0000175240        | 912  | 303 | 2 | Chr12: MDC007698.491: 10296 - 13111 | 1.0e-117 |
| MdWRKY71-1               | MDP0000505247        | 1359 | 452 | 5 | Chr9: MDC025315.21: 129 - 8192      | 5.9e-160 |
| MdWRKY71-2               | MDP0000257129        | 1098 | 365 | 2 | Chr17: MDC005054.249: 11130 - 13484 | 1.8e-171 |
| MdWRKY72-1               | MDP0000161881        | 1782 | 593 | 5 | Chr16: MDC000416.241: 1247 - 3883   | 1.6e-214 |
| MdWRKY72-2               | MDP0000416279        | 1758 | 585 | 4 | Chr11: MDC006102.355: 6753 - 10026  | 2.6e-252 |
| MdWRKY72-3               | MDP0000452559        | 1239 | 412 | 2 | Chr9: MDC008814.320: 9734 - 11448   | 1.3e-166 |
| MdWRKY72-4               | MDP0000196330        | 1758 | 585 | 4 | Chr11: MDC011934.106: 307 - 3580    | 6.4e-254 |
| MdWRKY72-5               | MDP0000300712        | 2217 | 738 | 7 | Chr6: MDC016784.314: 9788 - 15070   | 1.2e-264 |
| MdWRKY72-6               | MDP0000308261        | 2124 | 707 | 6 | Chr6: MDC017781.114: 37370 - 42624  | 6.2e-265 |
| MdWRKY74-1               | MDP0000130716        | 993  | 330 | 2 | Unanchor:MDC018874.95: 1608 - 2839  | 2.3e-214 |
| MdWRKY74-2               | MDP0000234335        | 960  | 319 | 3 | Chr12: MDC016084.155: 9369 - 10917  | 2.3e-86  |
| MdWRKY74-3               | MDP0000231993        | 978  | 325 | 2 | Chr4: MDC011695.186: 1697 - 2966    | 4.4e-124 |
| MdWRKY75-1               | MDP0000123888        | 573  | 190 | 1 | Chr16: MDC008000.234: 1309 - 3257   | 1.4e-123 |
| MdWRKY75-2               | MDP0000142583        | 672  | 223 | 1 | Chr17: MDC021067.62: 11874 - 13752  | 1.3e-85  |
| MdWRKY75-3               | MDP0000154734        | 672  | 233 | 2 | Chr9: MDC023147.45: 4965 - 7678     | 4.1e-77  |
| MdWRKY75-4               | MDP0000263768        | 453  | 150 | 1 | Chr6: MDC001645.308: 35228 - 36005  | 6.7e-55  |
| MdWRKY75-5               | MDP0000123467        | 192  | 63  | 1 | Chr9: MDC007407.185: 1981 - 2255    | 7.2e-32  |
| MdWRKY75-6               | MDP0000792088        | 681  | 226 | 2 | Chr13: MDC018107.153: 10042 - 11712 | 9.1e-103 |
| <i>Manihot esculenta</i> |                      |      |     |   |                                     |          |
| MeWRKY1-2                | cassava4.1_008041m.g | 1299 | 432 | 5 | scaffold07536: 38292 - 40423        | 7.4e-285 |
| MeWRKY1-1                | cassava4.1_009560m.g | 1155 | 384 | 3 | scaffold03317: 145274 - 147528      | 2.1e-256 |
| MeWRKY2                  | cassava4.1_002389m.g | 2214 | 737 | 5 | scaffold03203: 179429 - 183397      | 0.0e+00  |
| MeWRKY3-1                | cassava4.1_006823m.g | 1425 | 474 | 3 | scaffold04233: 63799 - 68037        | 0.0e+00  |
| MeWRKY3-2                | cassava4.1_005267m.g | 1605 | 534 | 3 | scaffold06609: 532363 - 538474      | 0.0e+00  |
| MeWRKY4-1                | cassava4.1_005912m.g | 1527 | 508 | 3 | scaffold07873: 164300 - 167739      | 2.4e-221 |
| MeWRKY4-2                | cassava4.1_005605m.g | 1560 | 519 | 3 | scaffold11341: 800966 - 805076      | 0.0e+00  |
| MeWRKY5-1                | cassava4.1_027780m.g | 618  | 205 | 3 | scaffold11050: 5538 - 7515          | 4.4e-140 |
| MeWRKY5-2                | cassava4.1_016397m.g | 618  | 205 | 3 | scaffold08265: 3820169 - 3823424    | 6.2e-139 |
| MeWRKY6-1                | cassava4.1_021298m.g | 549  | 183 | 3 | scaffold12690: 49254 - 50156        | 2.1e-69  |
| MeWRKY6-2                | cassava4.1_024001m.g | 1728 | 575 | 4 | scaffold11251: 26632 - 28740        | 0.0e+00  |
| MeWRKY6-3                | cassava4.1_004331m.g | 1749 | 582 | 5 | scaffold06598: 271081 - 273620      | 0.0e+00  |
| MeWRKY6-4                | cassava4.1_030395m.g | 1863 | 620 | 4 | scaffold08001: 33833 - 36074        | 0.0e+00  |

|            |                      |      |     |   |                                  |          |
|------------|----------------------|------|-----|---|----------------------------------|----------|
| MeWRKY6-5  | cassava4.1_003305m.g | 1953 | 650 | 4 | scaffold03414: 3412 - 6072       | 1.1e-308 |
| MeWRKY7-1  | cassava4.1_010539m.g | 1077 | 358 | 2 | scaffold03484: 130961 - 132547   | 5.1e-238 |
| MeWRKY7-2  | cassava4.1_010007m.g | 1113 | 370 | 2 | scaffold00492: 165510 - 167223   | 7.1e-244 |
| MeWRKY9-1  | cassava4.1_032189m.g | 1293 | 430 | 4 | scaffold06914: 359445 - 361160   | 1.2e-286 |
| MeWRKY9-2  | cassava4.1_033113m.g | 1530 | 509 | 5 | scaffold05979: 103127 - 105387   | 0.0e+00  |
| MeWRKY10   | cassava4.1_026266m.g | 375  | 124 | 2 | scaffold06582: 784332 - 785524   | 7.5e-53  |
| MeWRKY11-1 | cassava4.1_011062m.g | 1035 | 344 | 2 | scaffold01046: 367570 - 369055   | 6.1e-226 |
| MeWRKY11-2 | cassava4.1_011056m.g | 1035 | 344 | 2 | scaffold06484: 9858 - 11444      | 1.0e-224 |
| MeWRKY11-3 | cassava4.1_011135m.g | 1029 | 342 | 2 | scaffold03874: 261993 - 263937   | 1.2e-227 |
| MeWRKY13-1 | cassava4.1_015466m.g | 690  | 229 | 2 | scaffold10954: 193689 - 196320   | 9.8e-125 |
| MeWRKY13-2 | cassava4.1_015440m.g | 690  | 229 | 2 | scaffold12231: 65733 - 68378     | 3.3e-117 |
| MeWRKY14-1 | cassava4.1_014297m.g | 780  | 259 | 2 | scaffold07571: 762773 - 763974   | 1.1e-175 |
| MeWRKY14-2 | cassava4.1_029757m.g | 639  | 213 | 2 | scaffold07301: 346062 - 347038   | 3.1e-118 |
| MeWRKY20-1 | cassava4.1_004372m.g | 1740 | 579 | 5 | scaffold03332: 324639 - 330792   | 0.0e+00  |
| MeWRKY20-2 | cassava4.1_004461m.g | 1725 | 574 | 5 | scaffold06278: 79089 - 84498     | 2.4e-309 |
| MeWRKY21-1 | cassava4.1_032017m.g | 966  | 322 | 2 | scaffold07035: 910534 - 911654   | 2.7e-232 |
| MeWRKY21-2 | cassava4.1_011033m.g | 1038 | 345 | 2 | scaffold02906: 214860 - 217706   | 1.1e-112 |
| MeWRKY21-3 | cassava4.1_028148m.g | 906  | 302 | 2 | scaffold11581: 195833 - 197023   | 7.8e-233 |
| MeWRKY21-4 | cassava4.1_011038m.g | 1038 | 349 | 2 | scaffold11998: 359241 - 361642   | 9.5e-122 |
| MeWRKY22-1 | cassava4.1_024248m.g | 984  | 327 | 2 | scaffold02658: 618480 - 619729   | 9.1e-221 |
| MeWRKY22-2 | cassava4.1_027012m.g | 1029 | 342 | 2 | scaffold03581: 1062737 - 1063959 | 9.5e-229 |
| MeWRKY23-1 | cassava4.1_012593m.g | 915  | 304 | 2 | scaffold07571: 656975 - 658228   | 2.8e-202 |
| MeWRKY23-2 | cassava4.1_012748m.g | 903  | 300 | 2 | scaffold00080: 65278 - 66511     | 3.2e-200 |
| MeWRKY27-1 | cassava4.1_008781m.g | 1230 | 409 | 2 | scaffold06089: 490434 - 491835   | 2.8e-280 |
| MeWRKY27-2 | cassava4.1_033531m.g | 1377 | 458 | 2 | scaffold00341: 351424 - 352981   | 1.3e-314 |
| MeWRKY27-3 | cassava4.1_020980m.g | 939  | 312 | 2 | scaffold05938: 86354 - 87511     | 4.1e-208 |
| MeWRKY27-4 | cassava4.1_028977m.g | 639  | 212 | 2 | scaffold07052: 1 - 903           | 2.3e-102 |
| MeWRKY28   | cassava4.1_029981m.g | 1011 | 336 | 2 | scaffold07520: 765376 - 767005   | 4.9e-231 |
| MeWRKY32-1 | cassava4.1_032932m.g | 849  | 283 | 2 | scaffold02022: 14374 - 15374     | 5.3e-140 |
| MeWRKY32-2 | cassava4.1_027662m.g | 1146 | 381 | 2 | scaffold00847: 2022942 - 2024601 | 2.4e-174 |
| MeWRKY32-3 | cassava4.1_008787m.g | 1227 | 408 | 3 | scaffold03049: 438605 - 440785   | 6.0e-271 |
| MeWRKY33-1 | cassava4.1_007752m.g | 1329 | 442 | 4 | scaffold06814: 508088 - 509823   | 9.3e-298 |
| MeWRKY33-2 | cassava4.1_004465m.g | 1725 | 574 | 4 | scaffold07519: 161519 - 163882   | 0.0e+00  |

|            |                      |      |     |   |                                  |          |
|------------|----------------------|------|-----|---|----------------------------------|----------|
| MeWRKY33-3 | cassava4.1_009059m.g | 1200 | 399 | 2 | scaffold03718: 21962 - 23602     | 5.1e-270 |
| MeWRKY34   | cassava4.1_002430m.g | 2202 | 733 | 5 | scaffold01441: 31631 - 36579     | 0.0e+00  |
| MeWRKY35-1 | cassava4.1_030132m.g | 1326 | 441 | 2 | scaffold07478: 706320 - 708761   | 2.0e-296 |
| MeWRKY35-2 | cassava4.1_027742m.g | 1386 | 461 | 2 | scaffold10322: 252574 - 255072   | 6.1e-307 |
| MeWRKY39   | cassava4.1_010602m.g | 1071 | 356 | 2 | scaffold03614: 2735461 - 2737434 | 1.2e-241 |
| MeWRKY40-1 | cassava4.1_033249m.g | 888  | 295 | 3 | scaffold00847: 1986892 - 1988243 | 1.1e-115 |
| MeWRKY40-2 | cassava4.1_024650m.g | 900  | 299 | 4 | scaffold03049: 373112 - 374338   | 4.8e-191 |
| MeWRKY40-3 | cassava4.1_012109m.g | 951  | 316 | 3 | scaffold02915: 262126 - 263656   | 6.6e-200 |
| MeWRKY40-4 | cassava4.1_011696m.g | 987  | 328 | 3 | scaffold05843: 146504 - 148035   | 1.0e-211 |
| MeWRKY40-5 | cassava4.1_014614m.g | 756  | 251 | 3 | scaffold00847: 1991461 - 1992835 | 5.5e-165 |
| MeWRKY40-6 | cassava4.1_014368m.g | 774  | 257 | 3 | scaffold03049: 380756 - 382555   | 9.1e-167 |
| MeWRKY41-1 | cassava4.1_032717m.g | 1023 | 340 | 2 | scaffold00341: 185431 - 187084   | 3.5e-230 |
| MeWRKY41-2 | cassava4.1_010398m.g | 1086 | 361 | 2 | scaffold06089: 251681 - 253588   | 7.8e-244 |
| MeWRKY41-3 | cassava4.1_011518m.g | 1002 | 333 | 2 | scaffold03175: 92714 - 94463     | 9.2e-227 |
| MeWRKY41-4 | cassava4.1_011106m.g | 1032 | 343 | 2 | scaffold09399: 194689 - 196277   | 1.7e-234 |
| MeWRKY41-5 | cassava4.1_010768m.g | 1059 | 352 | 2 | scaffold03581: 1192731 - 1195409 | 1.9e-231 |
| MeWRKY41-6 | cassava4.1_011089m.g | 1032 | 343 | 2 | scaffold02658: 712078 - 713983   | 9.9e-242 |
| MeWRKY42-1 | cassava4.1_023145m.g | 1506 | 501 | 5 | scaffold06278: 461756 - 464271   | 0.0e+00  |
| MeWRKY42-2 | cassava4.1_021542m.g | 1686 | 561 | 6 | scaffold03241: 68161 - 70997     | 0.0e+00  |
| MeWRKY43-1 | cassava4.1_022398m.g | 516  | 171 | 1 | scaffold03581: 1036456 - 1037257 | 2.8e-114 |
| MeWRKY43-2 | cassava4.1_033595m.g | 564  | 187 | 1 | scaffold02658: 610430 - 611373   | 1.3e-125 |
| MeWRKY44   | cassava4.1_007976m.g | 1305 | 434 | 5 | scaffold04651: 152250 - 155989   | 1.6e-295 |
| MeWRKY47-1 | cassava4.1_006003m.g | 1515 | 504 | 5 | scaffold00080: 388340 - 391378   | 0.0e+00  |
| MeWRKY47-2 | cassava4.1_021176m.g | 1518 | 505 | 5 | scaffold07571: 322902 - 325531   | 0.0e+00  |
| MeWRKY48-1 | cassava4.1_011894m.g | 969  | 322 | 2 | scaffold01551: 3414603 - 3416232 | 1.2e-213 |
| MeWRKY48-2 | cassava4.1_011940m.g | 966  | 321 | 2 | scaffold00708: 367528 - 369055   | 2.1e-164 |
| MeWRKY49   | cassava4.1_032605m.g | 858  | 285 | 2 | scaffold05873: 10175 - 12560     | 1.2e-190 |
| MeWRKY50-1 | cassava4.1_032004m.g | 450  | 149 | 2 | scaffold00206: 486601 - 487231   | 1.3e-97  |
| MeWRKY50-2 | cassava4.1_031483m.g | 492  | 163 | 2 | scaffold07859: 539800 - 540488   | 2.3e-110 |
| MeWRKY51   | cassava4.1_016594m.g | 606  | 201 | 2 | scaffold10954: 23861 - 25493     | 1.1e-135 |
| MeWRKY55-1 | cassava4.1_023169m.g | 948  | 315 | 2 | scaffold03454: 260885 - 262793   | 1.1e-209 |
| MeWRKY55-2 | cassava4.1_027942m.g | 939  | 312 | 2 | scaffold10729: 113727 - 115432   | 7.9e-209 |
| MeWRKY56   | cassava4.1_022257m.g | 522  | 174 | 1 | scaffold06935: 1365 - 1987       | 3.3e-74  |

|                            |                      |      |     |   |                                  |          |
|----------------------------|----------------------|------|-----|---|----------------------------------|----------|
| MeWRKY57-1                 | cassava4.1_026566m.g | 912  | 303 | 2 | scaffold12373: 44814 - 47819     | 1.6e-208 |
| MeWRKY57-2                 | cassava4.1_012575m.g | 915  | 304 | 2 | scaffold00109: 89941 - 93589     | 1.2e-205 |
| MeWRKY59                   | cassava4.1_008611m.g | 1245 | 414 | 3 | scaffold06711: 258341 - 262733   | 2.9e-277 |
| MeWRKY65-1                 | cassava4.1_014035m.g | 798  | 265 | 2 | scaffold04003: 29864 - 31436     | 2.1e-181 |
| MeWRKY65-2                 | cassava4.1_032956m.g | 792  | 263 | 2 | scaffold00834: 106694 - 107828   | 5.8e-148 |
| MeWRKY70-1                 | cassava4.1_011680m.g | 987  | 328 | 2 | scaffold09360: 273486 - 275435   | 2.3e-225 |
| MeWRKY70-2                 | cassava4.1_033846m.g | 822  | 274 | 2 | scaffold03614: 552094 - 553501   | 4.2e-106 |
| MeWRKY70-3                 | cassava4.1_012154m.g | 948  | 315 | 2 | scaffold10729: 109107 - 110558   | 5.4e-216 |
| MeWRKY70-4                 | cassava4.1_013417m.g | 849  | 282 | 2 | scaffold03454: 258099 - 259608   | 2.0e-189 |
| MeWRKY70-5                 | cassava4.1_014812m.g | 741  | 246 | 1 | scaffold11287: 22154 - 23391     | 2.7e-166 |
| MeWRKY71-1                 | cassava4.1_011936m.g | 966  | 321 | 2 | scaffold09120: 62859 - 64289     | 2.3e-219 |
| MeWRKY71-2                 | cassava4.1_012482m.g | 924  | 307 | 2 | scaffold06582: 166435 - 167738   | 4.9e-210 |
| MeWRKY71-3                 | cassava4.1_015949m.g | 651  | 216 | 1 | scaffold09702: 339821 - 340893   | 2.6e-53  |
| MeWRKY72-1                 | cassava4.1_004929m.g | 1647 | 548 | 3 | scaffold08359: 2218663 - 2220806 | 0.0e+00  |
| MeWRKY72-2                 | cassava4.1_032698m.g | 1662 | 553 | 3 | scaffold12794: 1580383 - 1582481 | 7.3e-227 |
| MeWRKY72-3                 | cassava4.1_026701m.g | 1677 | 558 | 3 | scaffold11495: 423070 - 425756   | 0.0e+00  |
| MeWRKY72-4                 | cassava4.1_026182m.g | 1587 | 528 | 3 | scaffold09180: 368608 - 371775   | 0.0e+00  |
| MeWRKY72-5                 | cassava4.1_027917m.g | 999  | 332 | 4 | scaffold06050: 105342 - 107529   | 7.0e-222 |
| MeWRKY75-1                 | cassava4.1_028994m.g | 573  | 190 | 1 | scaffold06711: 428863 - 430192   | 2.4e-125 |
| MeWRKY75-2                 | cassava4.1_023502m.g | 582  | 193 | 1 | scaffold03219: 357170 - 358201   | 1.3e-127 |
| MeWRKY75-3                 | cassava4.1_017208m.g | 552  | 183 | 1 | scaffold06028: 403119 - 404529   | 2.4e-122 |
| MeWRKY75-4                 | cassava4.1_017214m.g | 552  | 183 | 1 | scaffold00325: 479801 - 480856   | 1.3e-122 |
| MeWRKY75-5                 | cassava4.1_017377m.g | 540  | 179 | 1 | scaffold01701: 195921 - 196832   | 1.3e-117 |
| <i>Medicago truncatula</i> |                      |      |     |   |                                  |          |
| MtWRKY1-1                  | Medtr5g097490        | 1176 | 391 | 3 | chr5: 41665699 - 41667186        | 9.9e-261 |
| MtWRKY1-2                  | Medtr5g097500        | 936  | 311 | 1 | chr5: 41673897 - 41674989        | 1.8e-91  |
| MtWRKY3-1                  | Medtr5g042920        | 1302 | 433 | 3 | chr5: 18458993 - 18462875        | 1.0e-293 |
| MtWRKY3-2                  | Medtr7g011820        | 1566 | 521 | 3 | chr7: 2738150 - 2745216          | 0.0e+00  |
| MtWRKY4-1                  | Medtr4g082580        | 1167 | 388 | 3 | chr4: 28042631 - 28045908        | 4.4e-267 |
| MtWRKY4-2                  | Medtr6g046600        | 357  | 118 | 0 | chr6: 9798476 - 9798832          | 4.6e-76  |
| MtWRKY5                    | AC202489_18          | 1548 | 515 | 3 | AC202489.12: 64789 - 70103       | 0.0e+00  |
| MtWRKY6-1                  | Medtr2g088000        | 1809 | 602 | 4 | chr2: 27320043 - 27323462        | 0.0e+00  |
| MtWRKY6-2                  | Medtr4g047580        | 1761 | 586 | 4 | chr4: 13808222 - 13812118        | 0.0e+00  |

|            |               |      |     |   |                           |          |
|------------|---------------|------|-----|---|---------------------------|----------|
| MtWRKY6    | Medtr1g013790 | 768  | 255 | 3 | chr1: 3532717 - 3533977   | 3.3e-166 |
| MtWRKY11-1 | Medtr5g018380 | 537  | 178 | 2 | chr5: 6591918 - 6593332   | 2.8e-113 |
| MtWRKY11-2 | Medtr3g108960 | 1212 | 403 | 2 | chr3: 39033440 - 39035025 | 2.5e-269 |
| MtWRKY11-3 | Medtr4g127040 | 954  | 317 | 2 | chr4: 44094293 - 44095449 | 3.4e-207 |
| MtWRKY12   | Medtr2g045360 | 1266 | 421 | 5 | chr2: 16225588 - 16229077 | 9.5e-274 |
| MtWRKY13-1 | Medtr3g095080 | 735  | 244 | 2 | chr3: 32628073 - 32630168 | 1.2e-168 |
| MtWRKY13-2 | Medtr8g092140 | 648  | 215 | 2 | chr8: 26076085 - 26077862 | 2.7e-145 |
| MtWRKY15   | Medtr5g016610 | 816  | 271 | 2 | chr5: 5721691 - 5723310   | 3.8e-178 |
| MtWRKY17   | Medtr1g009380 | 1023 | 340 | 2 | chr1: 1920992 - 1923320   | 3.4e-225 |
| MtWRKY19   | Medtr7g104980 | 648  | 215 | 1 | chr7: 33725547 - 33726355 | 2.4e-140 |
| MtWRKY20-1 | Medtr5g094430 | 1638 | 545 | 5 | chr5: 40230167 - 40234129 | 0.0e+00  |
| MtWRKY20-2 | Medtr3g056100 | 1788 | 595 | 5 | chr3: 17614774 - 17621276 | 0.0e+00  |
| MtWRKY22-1 | Medtr7g079040 | 987  | 328 | 2 | chr7: 22190788 - 22192273 | 1.0e-217 |
| MtWRKY22-2 | Medtr7g038380 | 1017 | 338 | 2 | chr7: 11103701 - 11105381 | 2.0e-223 |
| MtWRKY22-3 | Medtr8g067750 | 2103 | 700 | 3 | chr8: 17346636 - 17350627 | 0.0e+00  |
| MtWRKY22-4 | Medtr7g105000 | 1077 | 358 | 2 | chr7: 33730293 - 33731583 | 1.2e-236 |
| MtWRKY22-5 | Medtr8g067650 | 1563 | 520 | 2 | chr8: 17302535 - 17305136 | 0.0e+00  |
| MtWRKY22-6 | Medtr8g067350 | 1317 | 438 | 2 | chr8: 17145617 - 17147973 | 1.1e-252 |
| MtWRKY23-1 | Medtr7g109800 | 885  | 294 | 2 | chr7: 34922486 - 34923943 | 2.6e-194 |
| MtWRKY23-2 | Medtr1g086790 | 978  | 325 | 2 | chr1: 23201879 - 23203731 | 1.1e-215 |
| MtWRKY23-3 | Medtr4g122530 | 1251 | 416 | 2 | chr4: 42405829 - 42407632 | 5.4e-277 |
| MtWRKY26   | Medtr5g074400 | 1746 | 581 | 4 | chr5: 30613078 - 30616836 | 0.0e+00  |
| MtWRKY27   | Medtr1g099600 | 939  | 312 | 2 | chr1: 28931060 - 28932347 | 1.3e-208 |
| MtWRKY32   | Medtr4g130900 | 1494 | 497 | 4 | chr4: 46014841 - 46020092 | 0.0e+00  |
| MtWRKY33-1 | Medtr5g074200 | 984  | 327 | 0 | chr5: 30495461 - 30496444 | 8.6e-215 |
| MtWRKY33-2 | Medtr3g036720 | 984  | 327 | 0 | chr3: 12143365 - 12144407 | 8.6e-215 |
| MtWRKY33-3 | Medtr5g093540 | 750  | 249 | 3 | chr5: 39805482 - 39806424 | 1.7e-162 |
| MtWRKY33-4 | Medtr3g031220 | 1527 | 508 | 4 | chr3: 9496559 - 9500669   | 0.0e+00  |
| MtWRKY33-5 | Medtr7g071120 | 1524 | 507 | 4 | chr7: 18554374 - 18557213 | 0.0e+00  |
| MtWRKY35   | Medtr7g109600 | 798  | 265 | 2 | chr7: 34798691 - 34800638 | 2.9e-170 |
| MtWRKY38-1 | Medtr2g075750 | 567  | 188 | 2 | chr2: 23170272 - 23171511 | 1.5e-98  |
| MtWRKY38-2 | Medtr2g075610 | 570  | 189 | 2 | chr2: 23121051 - 23122626 | 1.9e-124 |
| MtWRKY38-3 | Medtr2g075700 | 933  | 310 | 2 | chr2: 23151232 - 23155746 | 5.9e-209 |

|            |               |      |     |   |                           |          |
|------------|---------------|------|-----|---|---------------------------|----------|
| MtWRKY38-4 | Medtr2g075680 | 921  | 306 | 2 | chr2: 23141005 - 23143137 | 2.3e-207 |
| MtWRKY38-5 | Medtr2g075690 | 903  | 300 | 2 | chr2: 23148025 - 23150151 | 2.4e-203 |
| MtWRKY40-1 | Medtr4g007060 | 954  | 317 | 4 | chr4: 1057359 - 1059599   | 7.3e-205 |
| MtWRKY40-2 | Medtr3g106060 | 885  | 294 | 3 | chr3: 37454723 - 37458634 | 1.6e-192 |
| MtWRKY40-3 | Medtr1g013760 | 858  | 285 | 3 | chr1: 3519314 - 3521073   | 2.0e-186 |
| MtWRKY41-1 | Medtr7g117200 | 987  | 328 | 2 | chr7: 38173531 - 38175316 | 1.9e-220 |
| MtWRKY41-2 | Medtr3g090860 | 1023 | 340 | 2 | chr3: 30788232 - 30789490 | 1.1e-230 |
| MtWRKY42-1 | Medtr6g045670 | 1479 | 492 | 5 | chr6: 9154734 - 9156698   | 0.0e+00  |
| MtWRKY42-2 | Medtr4g132430 | 1479 | 492 | 5 | chr4: 46819313 - 46821277 | 0.0e+00  |
| MtWRKY42-3 | Medtr5g044700 | 816  | 271 | 6 | chr5: 19196079 - 19199060 | 2.7e-95  |
| MtWRKY43   | Medtr7g079010 | 660  | 219 | 1 | chr7: 22168220 - 22171006 | 4.3e-148 |
| MtWRKY44-1 | Medtr7g100510 | 1317 | 438 | 6 | chr7: 31666229 - 31670642 | 2.5e-295 |
| MtWRKY44-2 | Medtr7g080000 | 2115 | 704 | 4 | chr7: 22639699 - 22645235 | 0.0e+00  |
| MtWRKY44-3 | Medtr7g080020 | 2148 | 805 | 3 | chr7: 22653293 - 22657549 | 0.0e+00  |
| MtWRKY47   | Medtr7g110720 | 1302 | 433 | 5 | chr7: 35383726 - 35386918 | 2.4e-289 |
| MtWRKY48-1 | Medtr2g033820 | 1071 | 356 | 2 | chr2: 11689454 - 11691140 | 1.9e-236 |
| MtWRKY48-2 | Medtr5g029850 | 348  | 115 | 2 | chr5: 12309260 - 12310880 | 2.4e-34  |
| MtWRKY49   | Medtr3g095040 | 474  | 157 | 2 | chr3: 32600007 - 32600956 | 4.2e-89  |
| MtWRKY50-1 | Medtr3g104750 | 495  | 164 | 2 | chr3: 36821149 - 36822012 | 5.4e-110 |
| MtWRKY50-2 | Medtr1g015140 | 489  | 162 | 2 | chr1: 4119896 - 4120611   | 1.2e-107 |
| MtWRKY51-1 | Medtr3g095030 | 273  | 90  | 1 | chr3: 32599270 - 32599654 | 2.8e-39  |
| MtWRKY51-2 | Medtr8g092010 | 555  | 184 | 2 | chr8: 25980319 - 25982171 | 2.1e-83  |
| MtWRKY53   | AC233680_9    | 651  | 217 | 2 | AC233680.1: 33048 - 35491 | 2.0e-139 |
| MtWRKY55   | Medtr5g067680 | 1074 | 357 | 2 | chr5: 27618450 - 27622967 | 1.2e-244 |
| MtWRKY57   | Medtr5g043880 | 1098 | 365 | 4 | chr5: 18854021 - 18861097 | 4.6e-178 |
| MtWRKY61   | Medtr4g107970 | 1842 | 613 | 4 | chr4: 37140579 - 37144825 | 0.0e+00  |
| MtWRKY65   | Medtr8g087000 | 735  | 244 | 2 | chr8: 24099398 - 24100512 | 3.1e-164 |
| MtWRKY69   | Medtr2g083870 | 786  | 261 | 2 | chr2: 25558124 - 25562407 | 1.4e-177 |
| MtWRKY70-1 | Medtr7g073380 | 885  | 294 | 2 | chr7: 19618880 - 19620570 | 2.2e-201 |
| MtWRKY70-2 | Medtr7g073430 | 852  | 283 | 2 | chr7: 19635883 - 19638509 | 1.9e-195 |
| MtWRKY70-3 | Medtr8g005750 | 840  | 279 | 2 | chr8: 438924 - 440198     | 9.2e-188 |
| MtWRKY70   | Medtr5g067700 | 711  | 236 | 2 | chr5: 27630061 - 27634595 | 4.5e-158 |
| MtWRKY71   | Medtr5g091390 | 933  | 310 | 2 | chr5: 38795236 - 38797564 | 3.0e-204 |



|                           |                   |      |     |   |                                |          |
|---------------------------|-------------------|------|-----|---|--------------------------------|----------|
| MtWRKY72                  | Medtr7g009730     | 1746 | 581 | 3 | chr7: 1692122 - 1695833        | 0.0e+00  |
| <i>Micromonas pusilla</i> |                   |      |     |   |                                |          |
| MpWRKY4                   | EuGene.1200010296 | 1242 | 413 | 1 | Chr_12: 451782 - 453417        | 6.7e-45  |
| MpWRKY45                  | EuGene.0900010102 | 816  | 271 | 0 | Chr_09: 217114 - 217929        | 1.2e-179 |
| <i>Mimulus guttatus</i>   |                   |      |     |   |                                |          |
| MgWRKY2                   | mgv1a002460m.g    | 2016 | 671 | 4 | scaffold_4: 1069186 - 1071980  | 0.0e+00  |
| MgWRKY3                   | mgv1a006365m.g    | 1344 | 447 | 4 | scaffold_66: 70065 - 72996     | 5.3e-305 |
| MgWRKY4-1                 | mgv11b004965m.g   | 1380 | 459 | 3 | scaffold_22: 339090 - 341822   | 0.0e+00  |
| MgWRKY4-2                 | mgv1a021306m.g    | 1614 | 537 | 3 | scaffold_11: 79091 - 81668     | 0.0e+00  |
| MgWRKY4-3                 | mgv1a004979m.g    | 1509 | 502 | 3 | scaffold_37: 847626 - 850286   | 0.0e+00  |
| MgWRKY5                   | mgv1a026438m.g    | 747  | 248 | 3 | scaffold_151: 497534 - 499999  | 1.6e-173 |
| MgWRKY6-1                 | mgv1a003939m.g    | 1662 | 553 | 4 | scaffold_4: 2203235 - 2205593  | 0.0e+00  |
| MgWRKY6-2                 | mgv1a008427m.g    | 1125 | 374 | 2 | scaffold_24: 1831329 - 1833050 | 5.5e-250 |
| MgWRKY6-3                 | mgv1a004322m.g    | 1602 | 533 | 4 | scaffold_235: 237247 - 239831  | 0.0e+00  |
| MgWRKY6-4                 | mgv1a007828m.g    | 1185 | 394 | 5 | scaffold_4: 335912 - 338457    | 1.0e-261 |
| MgWRKY7-1                 | mgv1a009584m.g    | 1014 | 337 | 2 | scaffold_5: 1038773 - 1040888  | 1.6e-223 |
| MgWRKY7-2                 | mgv1a009272m.g    | 1044 | 347 | 2 | scaffold_2: 2166770 - 2168346  | 1.9e-230 |
| MgWRKY11                  | mgv1a009891m.g    | 987  | 328 | 2 | scaffold_69: 1074670 - 1076442 | 5.6e-218 |
| MgWRKY12                  | mgv1a009879m.g    | 987  | 328 | 4 | scaffold_54: 840248 - 842157   | 4.1e-205 |
| MgWRKY14                  | mgv1a006007m.g    | 1386 | 461 | 3 | scaffold_83: 342250 - 344625   | 3.9e-315 |
| MgWRKY15                  | mgv1a009353m.g    | 1035 | 344 | 2 | scaffold_11: 1407100 - 1408532 | 1.2e-219 |
| MgWRKY18                  | mgv1a025068m.g    | 768  | 255 | 2 | scaffold_36: 921976 - 923228   | 4.8e-169 |
| MgWRKY19                  | mgv1a019464m.g    | 1026 | 341 | 1 | scaffold_207: 197618 - 199136  | 1.6e-148 |
| MgWRKY20                  | mgv1a003822m.g    | 1689 | 562 | 5 | scaffold_4: 604438 - 607772    | 0.0e+00  |
| MgWRKY21-1                | mgv1a021173m.g    | 357  | 118 | 2 | scaffold_1: 3113096 - 3113687  | 7.1e-76  |
| MgWRKY21-2                | mgv1a008853m.g    | 1083 | 360 | 2 | scaffold_92: 142692 - 144552   | 5.1e-244 |
| MgWRKY22-1                | mgv1a009333m.g    | 1038 | 345 | 2 | scaffold_27: 1432873 - 1434252 | 2.6e-233 |
| MgWRKY22-2                | mgv1a009324m.g    | 1038 | 345 | 2 | scaffold_211: 373046 - 375187  | 4.7e-233 |
| MgWRKY23                  | mgv1a010400m.g    | 942  | 313 | 2 | scaffold_1: 4629525 - 4630949  | 8.9e-211 |
| MgWRKY26-1                | mgv1a004369m.g    | 1596 | 531 | 4 | scaffold_13: 2228743 - 2231285 | 0.0e+00  |
| MgWRKY26-2                | mgv1a004351m.g    | 1596 | 531 | 4 | scaffold_1: 820220 - 822528    | 0.0e+00  |
| MgWRKY27                  | mgv1a023144m.g    | 1158 | 385 | 2 | scaffold_51: 1032810 - 1034148 | 1.1e-259 |
| MgWRKY29                  | mgv1a024960m.g    | 1005 | 334 | 2 | scaffold_60: 973453 - 974789   | 5.8e-228 |

|            |                |      |     |   |                                  |          |
|------------|----------------|------|-----|---|----------------------------------|----------|
| MgWRKY30   | mgv1a019824m.g | 492  | 163 | 2 | scaffold_50: 841141 - 841923     | 1.0e-103 |
| MgWRKY32-1 | mgv1a009827m.g | 993  | 330 | 3 | scaffold_209: 70744 - 72608      | 1.8e-227 |
| MgWRKY32-2 | mgv1a004242m.g | 1617 | 538 | 4 | scaffold_228: 345762 - 349615    | 0.0e+00  |
| MgWRKY34-1 | mgv1a018837m.g | 1488 | 496 | 6 | scaffold_16: 38873 - 41198       | 0.0e+00  |
| MgWRKY34-2 | mgv1a019661m.g | 1701 | 566 | 5 | scaffold_24: 1182309 - 1185523   | 0.0e+00  |
| MgWRKY35-1 | mgv1a017713m.g | 1281 | 426 | 2 | scaffold_12: 1781651 - 1783461   | 4.5e-291 |
| MgWRKY35-2 | mgv1a012761m.g | 726  | 241 | 2 | scaffold_1: 4567726 - 4568965    | 5.7e-162 |
| MgWRKY36   | mgv1a026752m.g | 1428 | 476 | 2 | scaffold_37: 277160 - 278787     | 1.5e-314 |
| MgWRKY40   | mgv1a010320m.g | 951  | 316 | 3 | scaffold_7: 2928201 - 2929833    | 7.3e-204 |
| MgWRKY41   | mgv1a009487m.g | 1023 | 340 | 2 | scaffold_158: 114439 - 115917    | 2.5e-234 |
| MgWRKY43   | mgv1a020274m.g | 579  | 192 | 1 | scaffold_60: 963815 - 964718     | 5.1e-129 |
| MgWRKY46-1 | mgv1a008753m.g | 1092 | 363 | 2 | scaffold_6: 1516945 - 1521190    | 1.9e-238 |
| MgWRKY46-2 | mgv1a025234m.g | 897  | 298 | 2 | scaffold_6: 1565196 - 1567928    | 4.9e-202 |
| MgWRKY48-1 | mgv1a020914m.g | 1047 | 348 | 2 | scaffold_102: 149194 - 150830    | 2.8e-237 |
| MgWRKY48-2 | mgv1a023570m.g | 600  | 199 | 1 | scaffold_335: 147749 - 148436    | 7.4e-132 |
| MgWRKY49   | mgv1a014828m.g | 534  | 177 | 1 | scaffold_13: 1208143 - 1209097   | 1.2e-116 |
| MgWRKY50   | mgv1a014674m.g | 549  | 182 | 3 | scaffold_122: 157885 - 159258    | 1.2e-120 |
| MgWRKY51-1 | mgv1a022461m.g | 516  | 171 | 3 | scaffold_36: 1679897 - 1680930   | 1.3e-112 |
| MgWRKY51-2 | mgv1a014924m.g | 525  | 174 | 2 | scaffold_79: 448317 - 449226     | 8.8e-116 |
| MgWRKY53-1 | mgv1a010015m.g | 975  | 324 | 2 | scaffold_27: 1649630 - 1651800   | 2.3e-220 |
| MgWRKY53-2 | mgv1a020603m.g | 603  | 201 | 2 | scaffold_168: 433994 - 435409    | 7.2e-132 |
| MgWRKY53-3 | mgv1a019981m.g | 1071 | 356 | 2 | scaffold_51: 1206299 - 1208096   | 1.1e-243 |
| MgWRKY53-4 | mgv1a021631m.g | 759  | 253 | 2 | scaffold_60: 707384 - 708336     | 4.1e-176 |
| MgWRKY55   | mgv1a024310m.g | 1098 | 365 | 2 | scaffold_8: 3166914 - 3169937    | 1.9e-249 |
| MgWRKY57-1 | mgv1a009929m.g | 984  | 327 | 3 | scaffold_66: 28110 - 30702       | 1.3e-219 |
| MgWRKY57-2 | mgv1a011170m.g | 873  | 290 | 2 | scaffold_37: 986084 - 988147     | 3.9e-195 |
| MgWRKY60   | mgv1a013791m.g | 633  | 210 | 3 | scaffold_69: 534705 - 535855     | 7.9e-141 |
| MgWRKY65   | mgv1a014940m.g | 639  | 212 | 1 | scaffold_13: 16480142 - 16480899 | 8.6e-121 |
| MgWRKY69   | mgv1a012827m.g | 720  | 239 | 3 | scaffold_186: 211229 - 214310    | 3.0e-100 |
| MgWRKY70-1 | mgv1a010128m.g | 966  | 321 | 2 | scaffold_8: 3172300 - 3174663    | 9.4e-219 |
| MgWRKY70-2 | mgv1a008874m.g | 1083 | 360 | 2 | scaffold_13: 2474424 - 2476158   | 6.0e-247 |
| MgWRKY71-1 | mgv1a023072m.g | 918  | 305 | 2 | scaffold_4: 4037622 - 4038734    | 1.1e-204 |
| MgWRKY71-2 | mgv1a022795m.g | 1053 | 350 | 2 | scaffold_12: 2215926 - 2217540   | 2.3e-234 |

|                     |                |      |      |    |                                |          |
|---------------------|----------------|------|------|----|--------------------------------|----------|
| MgWRKY71-3          | mgv1a022066m.g | 996  | 331  | 2  | scaffold_34: 1655529 - 1657135 | 9.1e-226 |
| MgWRKY72-1          | mgv1a021188m.g | 1698 | 565  | 5  | scaffold_20: 1887952 - 1891371 | 1.0e-259 |
| MgWRKY72-2          | mgv1a025718m.g | 1398 | 465  | 2  | scaffold_233: 216049 - 217695  | 3.3e-315 |
| MgWRKY75            | mgv1a021286m.g | 387  | 128  | 1  | scaffold_104: 931637 - 932636  | 8.8e-84  |
| <i>Oryza sativa</i> |                |      |      |    |                                |          |
| OsWRKY1             | LOC_Os01g14440 | 1752 | 583  | 4  | Chr1: 8084372 - 8087044        | 0.0e+00  |
| OsWRKY2             | LOC_Os10g42850 | 900  | 299  | 1  | Chr10: 23107503 - 23108646     | 2.0e-204 |
| OsWRKY3             | LOC_Os03g55080 | 945  | 314  | 2  | Chr3: 31323190 - 31326926      | 3.7e-204 |
| OsWRKY4             | LOC_Os03g55164 | 3009 | 1002 | 11 | Chr3: 31391390 - 31399050      | 0.0e+00  |
| OsWRKY5             | LOC_Os05g04640 | 1509 | 502  | 5  | Chr5: 2179520 - 2184940        | 0.0e+00  |
| OsWRKY6             | LOC_Os03g58420 | 1143 | 380  | 2  | Chr3: 33286932 - 33288483      | 9.0e-245 |
| OsWRKY7             | LOC_Os05g46020 | 666  | 221  | 2  | Chr5: 26682472 - 26684208      | 1.9e-141 |
| OsWRKY8             | LOC_Os05g50610 | 1512 | 503  | 6  | Chr5: 29009136 - 29013100      | 0.0e+00  |
| OsWRKY9             | LOC_Os01g18584 | 1812 | 603  | 5  | Chr1: 10470540 - 10478800      | 0.0e+00  |
| OsWRKY10            | LOC_Os01g09100 | 660  | 219  | 0  | Chr1: 4572448 - 4573409        | 1.9e-146 |
| OsWRKY11            | LOC_Os01g43650 | 1140 | 379  | 3  | Chr1: 25009453 - 25012236      | 8.4e-258 |
| OsWRKY12            | LOC_Os01g43550 | 1053 | 350  | 2  | Chr1: 24945286 - 24947296      | 6.7e-230 |
| OsWRKY13            | LOC_Os01g54600 | 951  | 316  | 2  | Chr1: 31409004 - 31410978      | 6.6e-207 |
| OsWRKY14            | LOC_Os01g53040 | 960  | 319  | 1  | Chr1: 30480134 - 30482161      | 1.9e-210 |
| OsWRKY15            | LOC_Os01g46800 | 825  | 274  | 2  | Chr1: 26687377 - 26688416      | 1.2e-181 |
| OsWRKY16            | LOC_Os01g47560 | 1743 | 580  | 4  | Chr1: 27196417 - 27200990      | 0.0e+00  |
| OsWRKY17            | LOC_Os01g74140 | 1233 | 410  | 2  | Chr1: 42946753 - 42948750      | 2.6e-279 |
| OsWRKY18            | LOC_Os01g60520 | 852  | 283  | 2  | Chr1: 34996792 - 35003226      | 1.1e-194 |
| OsWRKY19            | LOC_Os05g49620 | 834  | 277  | 2  | Chr5: 28471802 - 28473061      | 2.6e-183 |
| OsWRKY20            | LOC_Os01g60540 | 1128 | 375  | 2  | Chr1: 35008866 - 35011098      | 3.0e-249 |
| OsWRKY21            | LOC_Os01g60640 | 843  | 280  | 1  | Chr1: 35062734 - 35064940      | 3.6e-182 |
| OsWRKY22            | LOC_Os01g60490 | 798  | 265  | 2  | Chr1: 34981468 - 34985447      | 2.5e-182 |
| OsWRKY23            | LOC_Os01g53260 | 765  | 254  | 1  | Chr1: 30604295 - 30608077      | 8.0e-173 |
| OsWRKY24            | LOC_Os01g61080 | 1668 | 555  | 4  | Chr1: 35347978 - 35350645      | 0.0e+00  |
| OsWRKY25            | LOC_Os08g13840 | 924  | 307  | 0  | Chr8: 8258575 - 8259595        | 4.7e-199 |
| OsWRKY26            | LOC_Os01g51690 | 738  | 245  | 2  | Chr1: 29720923 - 29723065      | 9.2e-163 |
| OsWRKY27            | LOC_Os01g40430 | 933  | 310  | 2  | Chr1: 22824809 - 22827116      | 6.6e-208 |
| OsWRKY28            | LOC_Os06g44010 | 1191 | 396  | 2  | Chr6: 26509919 - 26511699      | 6.3e-257 |

|            |                |      |      |   |                            |          |
|------------|----------------|------|------|---|----------------------------|----------|
| OsWRKY29   | LOC_Os07g02060 | 873  | 290  | 2 | Chr7: 630562 - 634316      | 7.4e-192 |
| OsWRKY30   | LOC_Os08g38990 | 2025 | 674  | 4 | Chr8: 24645860 - 24649085  | 0.0e+00  |
| OsWRKY31   | LOC_Os06g30860 | 1041 | 346  | 1 | Chr6: 17915923 - 17917083  | 1.8e-236 |
| OsWRKY32   | LOC_Os02g53100 | 1815 | 604  | 5 | Chr2: 32489017 - 32495070  | 0.0e+00  |
| OsWRKY34   | LOC_Os02g43560 | 570  | 189  | 2 | Chr2: 26280253 - 26283914  | 1.9e-127 |
| OsWRKY35   | LOC_Os04g39570 | 2997 | 998  | 9 | Chr4: 23579869 - 23587188  | 0.0e+00  |
| OsWRKY36   | LOC_Os04g46060 | 753  | 250  | 3 | Chr4: 27284275 - 27290983  | 3.6e-175 |
| OsWRKY37   | LOC_Os04g50920 | 1545 | 514  | 3 | Chr4: 30132491 - 30136547  | 0.0e+00  |
| OsWRKY39   | LOC_Os02g16540 | 1086 | 361  | 2 | Chr2: 9446492 - 9448847    | 9.0e-240 |
| OsWRKY40   | LOC_Os11g02530 | 963  | 320  | 2 | Chr11: 787542 - 789030     | 4.5e-217 |
| OsWRKY41   | LOC_Os11g45920 | 1203 | 400  | 4 | Chr11: 27785982 - 27779324 | 1.6e-271 |
| OsWRKY42   | LOC_Os02g26430 | 762  | 253  | 2 | Chr2: 15521497 - 15522724  | 9.1e-166 |
| OsWRKY43   | LOC_Os05g49210 | 1878 | 625  | 5 | Chr5: 28238562 - 28241041  | 0.0e+00  |
| OsWRKY44   | LOC_Os03g21710 | 1071 | 356  | 2 | Chr3: 12394669 - 12396898  | 2.2e-231 |
| OsWRKY45   | LOC_Os05g25770 | 981  | 326  | 2 | Chr5: 14991579 - 14993800  | 2.7e-216 |
| OsWRKY46-1 | LOC_Os11g02480 | 675  | 224  | 2 | Chr11: 759587 - 763334     | 9.8e-149 |
| OsWRKY46-2 | LOC_Os12g02420 | 675  | 224  | 2 | Chr12: 802489 - 806097     | 8.9e-151 |
| OsWRKY47   | LOC_Os07g48260 | 1002 | 333  | 3 | Chr7: 28828793 - 28832398  | 1.8e-219 |
| OsWRKY48   | LOC_Os05g40060 | 996  | 331  | 1 | Chr5: 23529423 - 23530499  | 1.9e-217 |
| OsWRKY49   | LOC_Os05g49100 | 1260 | 419  | 2 | Chr5: 28154693 - 28157989  | 2.2e-285 |
| OsWRKY50   | LOC_Os11g02540 | 993  | 330  | 2 | Chr11: 795608 - 793116     | 6.0e-224 |
| OsWRKY51   | LOC_Os04g21950 | 981  | 326  | 2 | Chr4: 12425564 - 12427457  | 1.6e-215 |
| OsWRKY52   | LOC_Os11g02470 | 1008 | 335  | 2 | Chr11: 749998 - 751210     | 1.0e-227 |
| OsWRKY53   | LOC_Os05g27730 | 1464 | 487  | 4 | Chr5: 16150266 - 16152747  | 0.0e+00  |
| OsWRKY54   | LOC_Os05g40080 | 987  | 328  | 1 | Chr5: 23550611 - 23551716  | 1.1e-218 |
| OsWRKY55   | LOC_Os03g20550 | 633  | 210  | 2 | Chr3: 11650824 - 11652144  | 3.4e-144 |
| OsWRKY56   | LOC_Os12g02440 | 795  | 264  | 5 | Chr12: 817003 - 823002     | 6.3e-181 |
| OsWRKY57   | LOC_Os12g01180 | 1371 | 456  | 2 | Chr12: 100799 - 104008     | 0.0e+00  |
| OsWRKY58   | LOC_Os05g45230 | 546  | 181  | 1 | Chr5: 26256951 - 26257809  | 3.2e-113 |
| OsWRKY59   | LOC_Os11g45750 | 3609 | 1201 | 1 | Chr11: 27690288 - 27683640 | 0.0e+00  |
| OsWRKY60   | LOC_Os03g45450 | 447  | 148  | 2 | Chr3: 25651039 - 25652125  | 4.2e-98  |
| OsWRKY61   | LOC_Os11g45850 | 780  | 259  | 2 | Chr11: 27740142 - 27741375 | 8.5e-180 |
| OsWRKY62   | LOC_Os09g25070 | 957  | 318  | 3 | Chr9: 14992803 - 14994888  | 7.6e-204 |

|          |                |           |      |   |                            |          |
|----------|----------------|-----------|------|---|----------------------------|----------|
| OsWRKY64 | LOC_Os12g02450 | 966       | 321  | 3 | Chr12: 824302 - 825793     | 1.4e-216 |
| OsWRKY65 | LOC_Os12g02470 | 1025      | 342  | 2 | Chr12: 838755 - 836516     | 2.6e-230 |
| OsWRKY66 | LOC_Os02g47060 | 1521      | 506  | 2 | Chr2: 28726783 - 28730933  | 0.0e+00  |
| OsWRKY67 | LOC_Os05g09020 | 585       | 194  | 2 | Chr5: 4998210 - 4999626    | 4.8e-127 |
| OsWRKY68 | LOC_Os04g51560 | 930       | 309  | 2 | Chr4: 30545175 - 30546577  | 2.3e-200 |
| OsWRKY69 | LOC_Os08g29660 | 960       | 319  | 1 | Chr8: 18220041 - 18222408  | 2.3e-214 |
| OsWRKY70 | LOC_Os05g39720 | 1719      | 572  | 4 | Chr5: 23310474 - 23313449  | 0.0e+00  |
| OsWRKY71 | LOC_Os02g08440 | 1047      | 348  | 3 | Chr2: 4542762 - 4544983    | 2.6e-231 |
| OsWRKY72 | LOC_Os11g29870 | 729       | 242  | 1 | Chr11: 17352085 - 17355820 | 7.0e-159 |
| OsWRKY73 | LOC_Os06g05380 | 1584      | 527  | 2 | Chr6: 2429149 - 2433254    | 0.0e+00  |
| OsWRKY74 | LOC_Os09g16510 | 1086      | 361  | 2 | Chr9: 10128825 - 10131136  | 2.3e-240 |
| OsWRKY75 | LOC_Os05g25700 | Not found |      |   |                            |          |
| OsWRKY76 | LOC_Os09g25060 | 984       | 327  | 1 | Chr9: 14975932 - 14977713  | 4.1e-219 |
| OsWRKY77 | LOC_Os01g40260 | 741       | 246  | 2 | Chr1: 22731943 - 22733240  | 1.6e-163 |
| OsWRKY78 | LOC_Os07g39480 | 1857      | 618  | 5 | Chr7: 23654076 - 23659625  | 0.0e+00  |
| OsWRKY79 | LOC_Os03g21710 | 1071      | 356  | 2 | Chr3: 12394669 - 12396898  | 2.2e-231 |
| OsWRKY80 | LOC_Os09g30400 | 1902      | 633  | 5 | Chr9: 18496949 - 18500579  | 0.0e+00  |
| OsWRKY81 | LOC_Os12g02400 | 1014      | 337  | 2 | Chr12: 789403 - 790687     | 4.1e-231 |
| OsWRKY82 | LOC_Os08g17400 | 1653      | 550  | 3 | Chr8: 10633195 - 10639603  | 0.0e+00  |
| OsWRKY83 | LOC_Os12g40570 | 1098      | 365  | 4 | Chr12: 25100479 - 25104175 | 6.8e-244 |
| OsWRKY84 | LOC_Os03g33020 | 1434      | 478  | 3 | Chr3: 18882373 - 18893375  | 2.7e-254 |
| OsWRKY85 | LOC_Os12g32250 | 1623      | 540  | 5 | Chr12: 19473728 - 19478606 | 0.0e+00  |
| OsWRKY86 | LOC_Os01g60600 | 1077      | 358  | 2 | Chr1: 35032511 - 35035321  | 1.3e-237 |
| OsWRKY87 | LOC_Os03g53050 | 1164      | 387  | 3 | Chr3: 30422191 - 30425543  | 1.6e-259 |
| OsWRKY88 | LOC_Os03g63810 | 1164      | 384  | 2 | Chr3: 36039164 - 36043822  | 3.7e-264 |
| OsWRKY89 | LOC_Os05g03900 | 741       | 246  | 3 | Chr5: 1743366 - 1745281    | 1.3e-164 |
| OsWRKY90 | LOC_Os05g14370 | 927       | 308  | 2 | Chr5: 8086892 - 8088575    | 4.5e-211 |
| OsWRKY91 | LOC_Os05g40070 | 843       | 280  | 2 | Chr5: 23536113 - 23539013  | 1.6e-186 |
| OsWRKY92 | LOC_Os05g50700 | 990       | 329  | 2 | Chr5: 29064582 - 29065815  | 2.2e-223 |
| OsWRKY93 | LOC_Os06g06360 | 1176      | 391  | 2 | Chr6: 2958991 - 2963006    | 2.6e-267 |
| OsWRKY94 | LOC_Os07g17230 | 4074      | 1357 | 1 | Chr7: 10155452 - 10159775  | 0.0e+00  |
| OsWRKY95 | LOC_Os07g27670 | 783       | 260  | 2 | Chr7: 16147913 - 16149483  | 4.8e-178 |
| OsWRKY96 | LOC_Os07g40570 | 1299      | 432  | 3 | Chr7: 24311898 - 24315383  | 5.5e-298 |

|                                 |                   |      |     |    |                                |          |
|---------------------------------|-------------------|------|-----|----|--------------------------------|----------|
| OsWRKY97                        | LOC_Os01g09080    | 1524 | 507 | 4  | Chr1: 4566304 - 4568617        | 0.0e+00  |
| OsWRKY98                        | LOC_Os09g09630    | 876  | 291 | 2  | Chr9: 5187963 - 5190200        | 3.3e-201 |
| OsWRKY100                       | LOC_Os11g02520    | 843  | 280 | 2  | Chr11: 782358 - 783511         | 4.9e-194 |
| OsWRKY101                       | LOC_Os10g18099    | 831  | 276 | 2  | Chr10: 9184625 - 9192018       | 5.0e-190 |
| OsWRKY102                       | LOC_Os01g08710    | 1275 | 424 | 7  | Chr1: 4340849 - 4356383        | 4.7e-287 |
| OsWRKY103                       | LOC_Os01g62514    | 588  | 195 | 1  | Chr1: 36193840 - 36194611      | 1.5e-130 |
| OsWRKY104                       | LOC_Os11g02520    | 843  | 280 | 2  | Chr11: 782358 - 783511         | 4.9e-194 |
| OsWRKY105                       | LOC_Os03g33012    | 1434 | 477 | 3  | Chr3: 18882373 - 18893375      | 2.7e-245 |
| OsWRKY106                       | LOC_Os01g62510    | 612  | 203 | 1  | Chr1: 36188702 - 36191681      | 1.0e-134 |
| <i>Ostreococcus lucimarinus</i> |                   |      |     |    |                                |          |
| OIWRKY4                         | eugene.1100010253 | 735  | 244 | 1  | Chr_11: 473735 - 474522        | 5.4e-155 |
| OIWRKY51                        | ost_08_010_039    | 1047 | 348 | 0  | Chr_8: 362741 - 363787         | 3.3e-231 |
| <i>Panicum hallii</i>           |                   |      |     |    |                                |          |
| PhWRKY1                         | Pahal.0474s0006   | 1491 | 496 | 3  | scaffold_474: 37316 - 40177    | 1.3e-156 |
| PhWRKY2                         | Pahal.0196s0053   | 1275 | 424 | 2  | scaffold_196: 500807 - 502198  | 1.0e-191 |
| PhWRKY3                         | Pahal.0139s0013   | 963  | 320 | 3  | scaffold_139: 52649 - 56695    | 2.2e-159 |
| PhWRKY4                         | Pahal.0139s0024   | 2451 | 816 | 10 | scaffold_139: 121641 - 127290  | 0.0e+00  |
| PhWRKY5                         | Pahal.0632s0010   | 1590 | 529 | 5  | scaffold_632: 39054 - 43367    | 1.3e-177 |
| PhWRKY6                         | Pahal.0024s0166   | 1194 | 397 | 2  | scaffold_24: 932212 - 934483   | 5.1e-221 |
| PhWRKY7                         | Pahal.0217s0007   | 666  | 221 | 2  | scaffold_217: 31806 - 33464    | 5.3e-113 |
| PhWRKY8                         | Pahal.0019s0134   | 1011 | 336 | 1  | scaffold_19: 1183837 - 1186270 | 5.5e-159 |
| PhWRKY9                         | Pahal.0018s0331   | 1716 | 571 | 5  | scaffold_18: 2364616 - 2369464 | 5.1e-305 |
| PhWRKY10                        | Pahal.0003s0370   | 711  | 236 | 2  | scaffold_3: 2862259 - 2863688  | 2.0e-100 |
| PhWRKY11                        | Pahal.0048s0075   | 1089 | 362 | 2  | scaffold_48: 562376 - 565496   | 1.9e-186 |
| PhWRKY13                        | Pahal.0083s0190   | 900  | 299 | 2  | scaffold_83: 1167824 - 1169714 | 7.4e-166 |
| PhWRKY14                        | Pahal.0083s0050   | 918  | 305 | 1  | scaffold_83: 333065 - 334755   | 1.9e-172 |
| PhWRKY15                        | Pahal.0022s0158   | 975  | 324 | 2  | scaffold_22: 2108229 - 2110450 | 1.3e-154 |
| PhWRKY16                        | Pahal.0109s0057   | 1194 | 397 | 2  | scaffold_109: 575915 - 578958  | 1.1e-168 |
| PhWRKY17                        | Pahal.0043s0324   | 1083 | 360 | 2  | scaffold_43: 1915052 - 1917228 | 2.8e-92  |
| PhWRKY18                        | Pahal.0006s0269   | 780  | 259 | 2  | scaffold_6: 1586880 - 1590839  | 6.8e-150 |
| PhWRKY19                        | Pahal.0019s0243   | 864  | 287 | 2  | scaffold_19: 1793832 - 1795328 | 4.4e-124 |
| PhWRKY20                        | Pahal.0006s0268   | 1056 | 351 | 2  | scaffold_6: 1582885 - 1585626  | 2.1e-131 |
| PhWRKY21                        | Pahal.0006s0265   | 846  | 281 | 1  | scaffold_6: 1568159 - 1569821  | 1.7e-107 |

|            |                 |      |     |   |                                |          |
|------------|-----------------|------|-----|---|--------------------------------|----------|
| PhWRKY22   | Pahal.0006s0270 | 735  | 244 | 2 | scaffold_6: 1595459 - 1599053  | 2.5e-135 |
| PhWRKY23-1 | Pahal.0083s0066 | 759  | 252 | 1 | scaffold_83: 423913 - 426876   | 5.7e-114 |
| PhWRKY23-2 | Pahal.0078s0165 | 651  | 216 | 1 | scaffold_78: 1217115 - 1218197 | 1.9e-92  |
| PhWRKY24   | Pahal.0006s0232 | 1659 | 552 | 4 | scaffold_6: 1365755 - 1368551  | 0.0e+00  |
| PhWRKY25   | Pahal.0551s0001 | 663  | 220 | 1 | scaffold_551: 22670 - 24109    | 1.8e-94  |
| PhWRKY26   | Pahal.0306s0023 | 663  | 220 | 2 | scaffold_306: 180238 - 181516  | 4.2e-98  |
| PhWRKY27   | Pahal.0026s0109 | 981  | 326 | 1 | scaffold_26: 1421035 - 1422589 | 4.8e-144 |
| PhWRKY28   | Pahal.0001s0452 | 993  | 330 | 2 | scaffold_1: 4991854 - 4993722  | 6.3e-175 |
| PhWRKY29   | Pahal.0175s0048 | 1071 | 356 | 2 | scaffold_175: 357094 - 360467  | 1.6e-118 |
| PhWRKY30   | Pahal.0010s0278 | 2064 | 687 | 5 | scaffold_10: 1751601 - 1756098 | 0.0e+00  |
| PhWRKY31-1 | Pahal.0151s0007 | 1203 | 400 | 1 | scaffold_151: 103717 - 105251  | 1.4e-158 |
| PhWRKY31-2 | Pahal.0955s0002 | 957  | 318 | 1 | scaffold_955: 18388 - 19580    | 2.6e-51  |
| PhWRKY32   | Pahal.0062s0040 | 1677 | 558 | 4 | scaffold_62: 257298 - 259819   | 1.6e-308 |
| PhWRKY34   | Pahal.0015s0239 | 684  | 227 | 3 | scaffold_15: 1652148 - 1655345 | 4.4e-145 |
| PhWRKY35   | Pahal.0126s0160 | 2115 | 704 | 6 | scaffold_126: 891940 - 897553  | 0.0e+00  |
| PhWRKY36   | Pahal.0349s0045 | 693  | 230 | 3 | scaffold_349: 422953 - 426749  | 2.6e-140 |
| PhWRKY37   | Pahal.0094s0096 | 1428 | 475 | 2 | scaffold_94: 537788 - 541309   | 3.6e-288 |
| PhWRKY39-1 | Pahal.0055s0106 | 1134 | 377 | 2 | scaffold_55: 1000426 - 1001785 | 2.9e-148 |
| PhWRKY39-2 | Pahal.0180s0035 | 1134 | 377 | 2 | scaffold_180: 519069 - 522098  | 8.4e-182 |
| PhWRKY40-1 | Pahal.0072s0016 | 873  | 290 | 2 | scaffold_72: 355868 - 357580   | 3.9e-157 |
| PhWRKY40-2 | Pahal.0046s0303 | 792  | 263 | 2 | scaffold_46: 1976732 - 1978158 | 3.2e-126 |
| PhWRKY42   | Pahal.0105s0041 | 921  | 306 | 2 | scaffold_105: 908459 - 909804  | 2.0e-126 |
| PhWRKY43   | Pahal.0019s0278 | 1755 | 584 | 5 | scaffold_19: 1964519 - 1967309 | 6.2e-313 |
| PhWRKY44   | Pahal.0056s0177 | 990  | 329 | 2 | scaffold_56: 1345550 - 1346844 | 2.4e-152 |
| PhWRKY45   | Pahal.0025s0214 | 939  | 312 | 3 | scaffold_25: 2393948 - 2395788 | 1.8e-165 |
| PhWRKY46-1 | Pahal.0015s0207 | 678  | 225 | 2 | scaffold_15: 1437222 - 1439847 | 4.0e-125 |
| PhWRKY46-2 | Pahal.0072s0015 | 678  | 225 | 2 | scaffold_72: 348176 - 350725   | 9.7e-126 |
| PhWRKY47   | Pahal.0230s0011 | 1050 | 349 | 2 | scaffold_230: 75257 - 77570    | 4.8e-156 |
| PhWRKY48-1 | Pahal.0078s0201 | 906  | 301 | 2 | scaffold_78: 1369018 - 1370508 | 1.4e-94  |
| PhWRKY48-2 | Pahal.0078s0202 | 861  | 286 | 2 | scaffold_78: 1374042 - 1375577 | 2.0e-93  |
| PhWRKY48-3 | Pahal.0078s0205 | 747  | 248 | 1 | scaffold_78: 1405117 - 1405970 | 3.2e-35  |
| PhWRKY49   | Pahal.0019s0289 | 1227 | 408 | 2 | scaffold_19: 2029920 - 2032832 | 1.7e-223 |
| PhWRKY50   | Pahal.0328s0049 | 939  | 312 | 2 | scaffold_328: 351020 - 352910  | 6.2e-96  |

|            |                 |      |      |    |                                 |          |
|------------|-----------------|------|------|----|---------------------------------|----------|
| PhWRKY51   | Pahal.0087s0003 | 1137 | 378  | 2  | scaffold_87: 44068 - 45978      | 2.8e-201 |
| PhWRKY52   | Pahal.0015s0205 | 1002 | 333  | 1  | scaffold_15: 1428362 - 1430052  | 1.5e-94  |
| PhWRKY53-1 | Pahal.0164s0054 | 1002 | 333  | 0  | scaffold_164: 633409 - 634410   | 1.1e-154 |
| PhWRKY53-2 | Pahal.0150s0009 | 1461 | 486  | 2  | scaffold_150: 164449 - 166660   | 1.3e-259 |
| PhWRKY55   | Pahal.0056s0090 | 657  | 218  | 2  | scaffold_56: 744317 - 746729    | 4.1e-142 |
| PhWRKY57   | Pahal.0010s0053 | 594  | 197  | 2  | scaffold_10: 301956 - 303811    | 1.5e-126 |
| PhWRKY59   | Pahal.0107s0079 | 4899 | 1632 | 15 | scaffold_107: 1029515 - 1042493 | 0.0e+00  |
| PhWRKY60   | Pahal.0061s0164 | 468  | 155  | 2  | scaffold_61: 1809623 - 1811489  | 2.0e-56  |
| PhWRKY62   | Pahal.0290s0006 | 804  | 267  | 2  | scaffold_290: 44785 - 46038     | 4.9e-145 |
| PhWRKY64   | Pahal.0046s0306 | 873  | 290  | 2  | scaffold_46: 1991725 - 1992945  | 5.9e-162 |
| PhWRKY65   | Pahal.0046s0302 | 966  | 321  | 2  | scaffold_46: 1972224 - 1973933  | 4.3e-96  |
| PhWRKY66   | Pahal.0516s0013 | 1422 | 473  | 2  | scaffold_516: 75158 - 78712     | 3.2e-270 |
| PhWRKY67   | Pahal.0085s0241 | 603  | 200  | 2  | scaffold_85: 1496253 - 1497833  | 1.7e-107 |
| PhWRKY68   | Pahal.0094s0159 | 960  | 319  | 2  | scaffold_94: 874900 - 876458    | 1.8e-189 |
| PhWRKY70-1 | Pahal.0121s0192 | 1806 | 601  | 3  | scaffold_121: 1017038 - 1019971 | 0.0e+00  |
| PhWRKY70-2 | Pahal.0004s0019 | 576  | 191  | 1  | scaffold_4: 127995 - 129912     | 2.1e-48  |
| PhWRKY71   | Pahal.0423s0011 | 1065 | 354  | 1  | scaffold_423: 247618 - 249374   | 2.6e-180 |
| PhWRKY72   | Pahal.1077s0003 | 669  | 222  | 1  | scaffold_1077: 9748 - 13055     | 6.8e-103 |
| PhWRKY73   | Pahal.0030s0057 | 1812 | 603  | 4  | scaffold_30: 212864 - 217247    | 6.4e-286 |
| PhWRKY74-1 | Pahal.0420s0013 | 957  | 318  | 2  | scaffold_420: 142651 - 144762   | 2.9e-143 |
| PhWRKY74-2 | Pahal.0420s0011 | 999  | 332  | 2  | scaffold_420: 110369 - 112492   | 2.1e-158 |
| PhWRKY76   | Pahal.0003s0094 | 999  | 332  | 2  | scaffold_3: 982145 - 983831     | 1.4e-173 |
| PhWRKY77   | Pahal.0026s0093 | 726  | 241  | 2  | scaffold_26: 1300307 - 1301952  | 6.2e-75  |
| PhWRKY78   | Pahal.0020s0047 | 1815 | 604  | 5  | scaffold_20: 895804 - 901643    | 0.0e+00  |
| PhWRKY80   | Pahal.0262s0053 | 1734 | 577  | 6  | scaffold_262: 396251 - 400370   | 0.0e+00  |
| PhWRKY81-1 | Pahal.0046s0311 | 1029 | 342  | 1  | scaffold_46: 2014316 - 2015902  | 4.6e-84  |
| PhWRKY81-2 | Pahal.0203s0008 | 1119 | 372  | 3  | scaffold_203: 79074 - 85104     | 2.4e-228 |
| PhWRKY82   | Pahal.0316s0009 | 1752 | 583  | 3  | scaffold_316: 385612 - 391611   | 1.3e-311 |
| PhWRKY83-1 | Pahal.0264s0011 | 1074 | 357  | 4  | scaffold_264: 117760 - 121285   | 6.0e-224 |
| PhWRKY83-2 | Pahal.0007s0432 | 1047 | 348  | 3  | scaffold_7: 3301706 - 3304737   | 3.7e-228 |
| PhWRKY85   | Pahal.0130s0066 | 1467 | 488  | 3  | scaffold_130: 1067345 - 1072944 | 9.2e-298 |
| PhWRKY86   | Pahal.0006s0267 | 975  | 324  | 2  | scaffold_6: 1577881 - 1580642   | 1.2e-239 |
| PhWRKY87   | Pahal.0052s0090 | 1209 | 402  | 3  | scaffold_52: 980115 - 983266    | 1.2e-239 |



|                         |                   |      |      |    |                                |          |
|-------------------------|-------------------|------|------|----|--------------------------------|----------|
| PhWRKY88                | Pahal.0075s0122   | 1119 | 372  | 2  | scaffold_75: 1371272 - 1375583 | 3.2e-156 |
| PhWRKY90                | Pahal.0030s0295   | 819  | 272  | 2  | scaffold_30: 1734151 - 1735552 | 3.1e-126 |
| PhWRKY91                | Pahal.0078s0203   | 849  | 282  | 2  | scaffold_78: 1391599 - 1396139 | 1.3e-92  |
| PhWRKY92                | Pahal.0019s0131   | 969  | 322  | 2  | scaffold_19: 1163935 - 1165786 | 1.8e-170 |
| PhWRKY93                | Pahal.0081s0136   | 1122 | 373  | 2  | scaffold_81: 947768 - 951200   | 5.3e-190 |
| PhWRKY94                | Pahal.0037s0094   | 4065 | 1354 | 4  | scaffold_37: 851836 - 857889   | 0.0e+00  |
| PhWRKY95                | Pahal.0025s0225   | 1221 | 406  | 2  | scaffold_25: 2678329 - 2681858 | 6.1e-189 |
| PhWRKY97                | Pahal.0003s0369   | 1503 | 500  | 3  | scaffold_3: 2859009 - 2861211  | 1.2e-268 |
| PhWRKY101               | Pahal.0126s0030   | 777  | 258  | 3  | scaffold_126: 211968 - 216067  | 2.5e-122 |
| PhWRKY102               | Pahal.0003s0338   | 792  | 263  | 2  | scaffold_3: 2699440 - 2704838  | 4.4e-116 |
| PhWRKY103               | Pahal.0006s0108   | 1023 | 340  | 3  | scaffold_6: 673038 - 677006    | 2.2e-132 |
| <i>Panicum virgatum</i> |                   |      |      |    |                                |          |
| PvWRKY1-1               | Pavirv00018517m.g | 1410 | 469  | 3  | sg0.contig49092: 3069 - 5355   | 7.6e-150 |
| PvWRKY1-2               | Pavirv00024877m.g | 1383 | 460  | 2  | sg0.contig35974: 4057 - 5856   | 8.4e-134 |
| PvWRKY2-1               | Pavirv00010634m.g | 1341 | 446  | 1  | sg0.contig05245: 5189 - 6636   | 9.1e-180 |
| PvWRKY2-2               | Pavirv00062333m.g | 1305 | 434  | 1  | sg0.contig01221: 13249 - 14653 | 3.1e-171 |
| PvWRKY3-1               | Pavirv00031640m.g | 840  | 279  | 2  | sg0.contig124719: 1597 - 3113  | 2.2e-79  |
| PvWRKY3-2               | Pavirv00017243m.g | 1077 | 358  | 2  | sg0.contig49727: 1421 - 3912   | 4.4e-126 |
| PvWRKY3-3               | Pavirv00049589m.g | 939  | 312  | 2  | sg0.contig71071: 813 - 3531    | 6.0e-150 |
| PvWRKY3-4               | Pavirv00065590m.g | 792  | 263  | 2  | sg0.contig116611: 548 - 2962   | 9.6e-128 |
| PvWRKY4-1               | Pavirv00053344m.g | 1308 | 435  | 3  | sg0.contig112239: 388 - 2451   | 1.2e-239 |
| PvWRKY4-2               | Pavirv00061788m.g | 2571 | 856  | 10 | sg0.contig00886: 3079 - 8690   | 0.0e+00  |
| PvWRKY5-1               | Pavirv00001058m.g | 1101 | 367  | 3  | sg0.contig103473: 18 - 3670    | 1.7e-200 |
| PvWRKY5-2               | Pavirv00063802m.g | 969  | 323  | 4  | sg0.contig22823: 1207 - 4006   | 4.3e-155 |
| PvWRKY5-3               | Pavirv00022325m.g | 1071 | 356  | 2  | sg0.contig03365: 6821 - 9194   | 7.1e-172 |
| PvWRKY6-1               | Pavirv00069439m.g | 1215 | 404  | 2  | sg0.contig09946: 6513 - 8168   | 9.5e-213 |
| PvWRKY6-2               | Pavirv00038078m.g | 1212 | 403  | 2  | sg0.contig00208: 38497 - 40144 | 3.9e-207 |
| PvWRKY7-1               | Pavirv00040067m.g | 669  | 222  | 2  | sg0.contig55951: 1444 - 2405   | 1.7e-116 |
| PvWRKY7-2               | Pavirv00008412m.g | 669  | 222  | 2  | sg0.contig04214: 14877 - 16267 | 7.3e-117 |
| PvWRKY8-1               | Pavirv00050027m.g | 1047 | 348  | 1  | sg0.contig69331: 2322 - 4581   | 4.6e-157 |
| PvWRKY8-2               | Pavirv00004467m.g | 1041 | 346  | 1  | sg0.contig39094: 1342 - 3125   | 1.3e-153 |
| PvWRKY10-1              | Pavirv00065592m.g | 705  | 234  | 2  | sg0.contig117475: 1106 - 2012  | 4.9e-92  |
| PvWRKY10-2              | Pavirv00047822m.g | 720  | 239  | 2  | sg0.contig16283: 8164 - 9064   | 4.0e-104 |

|            |                   |      |     |   |                                |          |
|------------|-------------------|------|-----|---|--------------------------------|----------|
| PvWRKY11-1 | Pavirv00038371m.g | 1098 | 365 | 2 | sg0.contig00561: 5238 - 7645   | 4.4e-200 |
| PvWRKY11-2 | Pavirv00027741m.g | 651  | 216 | 1 | sg0.contig35531: 4947 - 6434   | 3.6e-104 |
| PvWRKY12-1 | Pavirv00027106m.g | 792  | 263 | 2 | sg0.contig25372: 6766 - 8231   | 2.3e-125 |
| PvWRKY12-2 | Pavirv00068239m.g | 858  | 285 | 2 | sg0.contig09482: 11318 - 13089 | 2.6e-132 |
| PvWRKY13-1 | Pavirv00050645m.g | 885  | 294 | 2 | sg0.contig69592: 2292 - 4530   | 1.2e-164 |
| PvWRKY13-2 | Pavirv00027885m.g | 726  | 241 | 1 | sg0.contig349583: 1 - 1095     | 5.4e-135 |
| PvWRKY14   | Pavirv00061092m.g | 897  | 298 | 1 | sg0.contig01311: 15630 - 16750 | 1.0e-156 |
| PvWRKY15-1 | Pavirv00001985m.g | 942  | 313 | 2 | sg0.contig10525: 4689 - 5878   | 4.5e-134 |
| PvWRKY15-2 | Pavirv00037070m.g | 945  | 314 | 2 | sg0.contig00519: 10934 - 12257 | 5.1e-144 |
| PvWRKY16   | Pavirv00018854m.g | 1212 | 403 | 2 | sg0.contig51694: 2331 - 5342   | 9.7e-219 |
| PvWRKY17   | Pavirv00035347m.g | 1140 | 379 | 2 | sg0.contig91525: 555 - 2492    | 8.2e-93  |
| PvWRKY18-1 | Pavirv00016957m.g | 780  | 259 | 3 | sg0.contig64038: 678 - 4303    | 4.6e-124 |
| PvWRKY18-2 | Pavirv00044062m.g | 654  | 217 | 4 | sg0.contig37716: 479 - 5928    | 5.6e-82  |
| PvWRKY18-3 | Pavirv00017521m.g | 690  | 229 | 2 | sg0.contig47900: 2652 - 5498   | 1.9e-91  |
| PvWRKY18-4 | Pavirv00049300m.g | 642  | 213 | 2 | sg0.contig69313: 1755 - 3789   | 5.0e-120 |
| PvWRKY18-5 | Pavirv00050600m.g | 573  | 191 | 1 | sg0.contig72711: 3131 - 4552   | 5.0e-105 |
| PvWRKY19-1 | Pavirv00009895m.g | 879  | 292 | 2 | sg0.contig04287: 13252 - 14359 | 5.6e-126 |
| PvWRKY19-2 | Pavirv00063052m.g | 876  | 291 | 2 | sg0.contig01453: 4664 - 5780   | 1.4e-128 |
| PvWRKY20   | Pavirv00039691m.g | 1026 | 341 | 2 | sg0.contig55507: 2069 - 4005   | 1.9e-111 |
| PvWRKY21-1 | Pavirv00026598m.g | 879  | 292 | 1 | sg0.contig25361: 3239 - 4245   | 6.5e-136 |
| PvWRKY21-2 | Pavirv00043464m.g | 849  | 282 | 1 | sg0.contig30566: 6017 - 7005   | 9.0e-135 |
| PvWRKY22-1 | Pavirv00044157m.g | 711  | 236 | 2 | sg0.contig37770: 1210 - 4674   | 3.4e-137 |
| PvWRKY22-2 | Pavirv00069037m.g | 732  | 243 | 2 | sg0.contig09817: 8254 - 12069  | 4.2e-136 |
| PvWRKY23-1 | Pavirv00062996m.g | 618  | 205 | 1 | sg0.contig01001: 27293 - 28028 | 5.6e-74  |
| PvWRKY23-2 | Pavirv00009408m.g | 597  | 198 | 1 | sg0.contig05232: 1090 - 1992   | 3.9e-81  |
| PvWRKY23-3 | Pavirv00009708m.g | 759  | 252 | 1 | sg0.contig04558: 6150 - 9297   | 6.3e-111 |
| PvWRKY24-1 | Pavirv00042576m.g | 1677 | 558 | 4 | sg0.contig16677: 3516 - 5798   | 0.0e+00  |
| PvWRKY24-2 | Pavirv00069894m.g | 1596 | 531 | 5 | sg0.contig08416: 11163 - 13409 | 7.6e-299 |
| PvWRKY25   | Pavirv00016428m.g | 867  | 288 | 0 | sg0.contig61609: 1582 - 2448   | 9.3e-136 |
| PvWRKY26-1 | Pavirv00052099m.g | 696  | 231 | 2 | sg0.contig111419: 1980 - 2972  | 6.7e-96  |
| PvWRKY26-2 | Pavirv00070662m.g | 705  | 234 | 2 | sg0.contig33064: 1507 - 2529   | 9.6e-93  |
| PvWRKY27-1 | Pavirv00050721m.g | 963  | 320 | 1 | sg0.contig69032: 919 - 2089    | 1.7e-137 |
| PvWRKY27-2 | Pavirv00056372m.g | 981  | 326 | 1 | sg0.contig79649: 1242 - 2422   | 2.7e-135 |

|            |                   |      |     |   |                                |          |
|------------|-------------------|------|-----|---|--------------------------------|----------|
| PvWRKY30-3 | Pavirv00041171m.g | 1701 | 566 | 4 | sg0.contig37240: 2165 - 4832   | 6.5e-316 |
| PvWRKY30-1 | Pavirv00038903m.g | 2052 | 683 | 4 | sg0.contig55239: 1176 - 4382   | 0.0e+00  |
| PvWRKY30-2 | Pavirv00048892m.g | 711  | 236 | 1 | sg0.contig158362: 1754 - 2705  | 1.0e-151 |
| PvWRKY31-1 | Pavirv00055861m.g | 1002 | 333 | 1 | sg0.contig76759: 1866 - 2995   | 4.9e-112 |
| PvWRKY31-2 | Pavirv00021649m.g | 1170 | 389 | 1 | sg0.contig14768: 4582 - 5872   | 3.0e-139 |
| PvWRKY31-3 | Pavirv00043094m.g | 1266 | 421 | 0 | sg0.contig305158: 30 - 1295    | 1.2e-97  |
| PvWRKY32-1 | Pavirv00032166m.g | 1563 | 520 | 5 | sg0.contig127640: 2 - 2323     | 2.6e-231 |
| PvWRKY32-2 | Pavirv00061157m.g | 1695 | 564 | 4 | sg0.contig01438: 10394 - 12730 | 2.6e-297 |
| PvWRKY34-1 | Pavirv00002817m.g | 492  | 164 | 2 | sg0.contig345092: 277 - 956    | 4.4e-97  |
| PvWRKY34-2 | Pavirv00003202m.g | 549  | 182 | 2 | sg0.contig312236: 347 - 1257   | 2.7e-99  |
| PvWRKY35   | Pavirv00011336m.g | 1737 | 578 | 3 | sg0.contig89891: 210 - 3135    | 1.8e-306 |
| PvWRKY36-1 | Pavirv00055062m.g | 732  | 243 | 3 | sg0.contig76110: 44 - 3413     | 1.7e-130 |
| PvWRKY36-2 | Pavirv00010062m.g | 654  | 217 | 3 | sg0.contig04727: 3455 - 6904   | 1.7e-118 |
| PvWRKY36-3 | Pavirv00065780m.g | 678  | 225 | 3 | sg0.contig117034: 517 - 3377   | 3.7e-143 |
| PvWRKY37-1 | Pavirv00043162m.g | 1404 | 467 | 2 | sg0.contig30337: 2348 - 5136   | 6.0e-268 |
| PvWRKY37-2 | Pavirv00057597m.g | 1452 | 483 | 2 | sg0.contig28707: 3570 - 6473   | 4.5e-280 |
| PvWRKY39-1 | Pavirv00035415m.g | 1122 | 373 | 2 | sg0.contig94203: 603 - 3134    | 1.3e-170 |
| PvWRKY39-2 | Pavirv00000224m.g | 1077 | 358 | 3 | sg0.contig39325: 1744 - 3868   | 1.4e-156 |
| PvWRKY39-3 | Pavirv00067903m.g | 1047 | 348 | 2 | sg0.contig09513: 3475 - 4751   | 9.9e-128 |
| PvWRKY39-4 | Pavirv00002176m.g | 990  | 330 | 2 | sg0.contig105785: 14 - 1228    | 3.6e-125 |
| PvWRKY41   | Pavirv00005806m.g | 978  | 326 | 1 | sg0.contig18022: 8423 - 9626   | 3.0e-189 |
| PvWRKY42-1 | Pavirv00053526m.g | 951  | 316 | 2 | sg0.contig113742: 1992 - 3126  | 4.0e-123 |
| PvWRKY42-2 | Pavirv00057672m.g | 945  | 314 | 2 | sg0.contig289144: 22 - 1156    | 2.0e-114 |
| PvWRKY43-1 | Pavirv00038700m.g | 1500 | 500 | 5 | sg0.contig00265: 37885 - 40068 | 2.7e-272 |
| PvWRKY43-2 | Pavirv00032754m.g | 1365 | 455 | 5 | sg0.contig12738: 9353 - 11404  | 5.5e-255 |
| PvWRKY44   | Pavirv00049526m.g | 1011 | 336 | 2 | sg0.contig72880: 1882 - 3094   | 1.7e-151 |
| PvWRKY45-1 | Pavirv00026100m.g | 738  | 245 | 2 | sg0.contig246151: 2 - 1279     | 9.4e-126 |
| PvWRKY45-2 | Pavirv00007067m.g | 936  | 311 | 2 | sg0.contig45687: 3828 - 5085   | 7.7e-168 |
| PvWRKY46   | Pavirv00041424m.g | 675  | 224 | 2 | sg0.contig37453: 687 - 4554    | 1.2e-127 |
| PvWRKY47-1 | Pavirv00013500m.g | 1089 | 362 | 3 | sg0.contig18441: 4077 - 6204   | 1.6e-119 |
| PvWRKY47-2 | Pavirv00058001m.g | 753  | 250 | 2 | sg0.contig195219: 654 - 2308   | 5.7e-117 |
| PvWRKY48-1 | Pavirv00038896m.g | 567  | 188 | 1 | sg0.contig56245: 16 - 735      | 2.3e-51  |
| PvWRKY48-2 | Pavirv00058430m.g | 816  | 271 | 3 | sg0.contig20007: 3447 - 4887   | 4.9e-79  |

|            |                   |      |     |   |                                |          |
|------------|-------------------|------|-----|---|--------------------------------|----------|
| PvWRKY48-3 | Pavirv00052423m.g | 606  | 201 | 3 | sg0.contig111199: 1897 - 3115  | 3.4e-90  |
| PvWRKY49-1 | Pavirv00046378m.g | 750  | 250 | 3 | sg0.contig135288: 1131 - 2953  | 4.3e-115 |
| PvWRKY49-2 | Pavirv00020779m.g | 1212 | 403 | 2 | sg0.contig14381: 1275 - 3648   | 7.0e-211 |
| PvWRKY50   | Pavirv00022047m.g | 828  | 275 | 2 | sg0.contig144298: 880 - 2383   | 5.9e-63  |
| PvWRKY51   | Pavirv00042908m.g | 1014 | 337 | 2 | sg0.contig17085: 6994 - 8212   | 3.3e-183 |
| PvWRKY52   | Pavirv00004601m.g | 1044 | 348 | 1 | sg0.contig176760: 1265 - 2443  | 4.5e-76  |
| PvWRKY55   | Pavirv00059292m.g | 663  | 220 | 2 | sg0.contig14995: 67 - 1279     | 2.8e-138 |
| PvWRKY57-1 | Pavirv00042162m.g | 1344 | 447 | 2 | sg0.contig16644: 5352 - 8388   | 2.1e-209 |
| PvWRKY57-2 | Pavirv00048768m.g | 828  | 275 | 3 | sg0.contig164542: 113 - 2644   | 3.2e-112 |
| PvWRKY57-3 | Pavirv00047449m.g | 804  | 267 | 3 | sg0.contig164372: 102 - 2647   | 3.4e-104 |
| PvWRKY58   | Pavirv00036176m.g | 630  | 209 | 2 | sg0.contig97021: 1392 - 2478   | 1.5e-111 |
| PvWRKY60   | Pavirv00027198m.g | 354  | 117 | 1 | sg0.contig248491: 584 - 1304   | 7.5e-54  |
| PvWRKY61   | Pavirv00003238m.g | 1146 | 382 | 2 | sg0.contig314730: 84 - 1442    | 1.1e-175 |
| PvWRKY62-1 | Pavirv00012739m.g | 828  | 275 | 2 | sg0.contig99172: 1733 - 2857   | 6.4e-144 |
| PvWRKY62-2 | Pavirv00070849m.g | 825  | 274 | 2 | sg0.contig33194: 3466 - 4577   | 6.1e-149 |
| PvWRKY64-1 | Pavirv00011287m.g | 873  | 290 | 2 | sg0.contig84741: 1301 - 2414   | 6.3e-159 |
| PvWRKY64-2 | Pavirv00012439m.g | 864  | 287 | 2 | sg0.contig89171: 967 - 2167    | 1.9e-157 |
| PvWRKY64-3 | Pavirv00010955m.g | 864  | 287 | 2 | sg0.contig89320: 930 - 2133    | 6.3e-156 |
| PvWRKY64   | Pavirv00017999m.g | 978  | 325 | 3 | sg0.contig48629: 2301 - 3805   | 8.1e-123 |
| PvWRKY65   | Pavirv00036260m.g | 969  | 322 | 2 | sg0.contig95572: 2098 - 3815   | 9.0e-75  |
| PvWRKY66   | Pavirv00055255m.g | 1425 | 474 | 2 | sg0.contig74356: 1124 - 4505   | 8.4e-267 |
| PvWRKY67-1 | Pavirv00043826m.g | 618  | 205 | 2 | sg0.contig30467: 639 - 2082    | 5.9e-104 |
| PvWRKY67-2 | Pavirv00068323m.g | 606  | 201 | 2 | sg0.contig09123: 8703 - 9661   | 4.1e-104 |
| PvWRKY68-1 | Pavirv00027420m.g | 948  | 315 | 2 | sg0.contig35227: 839 - 2199    | 1.8e-190 |
| PvWRKY68-2 | Pavirv00069838m.g | 951  | 316 | 2 | sg0.contig08600: 1315 - 2659   | 2.3e-188 |
| PvWRKY69-1 | Pavirv00049728m.g | 1005 | 334 | 0 | sg0.contig71241: 3556 - 4638   | 3.1e-149 |
| PvWRKY69-2 | Pavirv00006996m.g | 993  | 330 | 0 | sg0.contig45488: 3707 - 4699   | 2.2e-147 |
| PvWRKY70-1 | Pavirv00031145m.g | 1683 | 560 | 3 | sg0.contig05929: 12408 - 15172 | 1.4e-307 |
| PvWRKY70-2 | Pavirv00010141m.g | 1701 | 566 | 3 | sg0.contig05106: 354 - 2758    | 3.4e-307 |
| PvWRKY71-1 | Pavirv00005222m.g | 966  | 321 | 1 | sg0.contig178168: 38 - 1255    | 1.3e-157 |
| PvWRKY71-2 | Pavirv00012070m.g | 975  | 324 | 2 | sg0.contig85921: 1492 - 2834   | 3.4e-174 |
| PvWRKY71-3 | Pavirv00037083m.g | 993  | 330 | 2 | sg0.contig00109: 9105 - 10290  | 1.3e-171 |
| PvWRKY72-1 | Pavirv00020938m.g | 231  | 76  | 0 | sg0.contig145844: 383 - 613    | 2.1e-53  |

|            |                   |      |     |   |                                |          |
|------------|-------------------|------|-----|---|--------------------------------|----------|
| PvWRKY72-1 | Pavir.8NG230700   | 231  | 76  | 0 | Chr08N:51823851..51826337      | 5.1e-42  |
| PvWRKY74-1 | Pavirv00028854m.g | 996  | 331 | 2 | sg0.contig07290: 12580 - 14276 | 3.6e-157 |
| PvWRKY74-2 | Pavirv00065647m.g | 966  | 321 | 2 | sg0.contig116216: 1270 - 2655  | 1.0e-136 |
| PvWRKY74-3 | Pavirv00056968m.g | 741  | 246 | 2 | sg0.contig28757: 10 - 1204     | 1.1e-108 |
| PvWRKY76-1 | Pavirv00046266m.g | 975  | 324 | 2 | sg0.contig134911: 1093 - 2265  | 1.7e-165 |
| PvWRKY76-2 | Pavirv00055081m.g | 999  | 332 | 2 | sg0.contig77257: 2060 - 3273   | 1.1e-163 |
| PvWRKY77-1 | Pavirv00070170m.g | 675  | 224 | 2 | sg0.contig332348: 33 - 1227    | 5.7e-72  |
| PvWRKY77-2 | Pavirv00021956m.g | 678  | 225 | 2 | sg0.contig142463: 666 - 1537   | 3.1e-54  |
| PvWRKY78-1 | Pavirv00042824m.g | 1464 | 487 | 3 | sg0.contig16674: 5505 - 8504   | 4.8e-291 |
| PvWRKY78-2 | Pavirv00070457m.g | 1389 | 462 | 3 | sg0.contig33041: 628 - 3582    | 3.5e-282 |
| PvWRKY79   | Pavirv00068795m.g | 999  | 332 | 2 | sg0.contig09315: 1529 - 2720   | 2.8e-151 |
| PvWRKY80   | Pavirv00039586m.g | 1878 | 626 | 4 | sg0.contig57260: 3 - 3513      | 0.0e+00  |
| PvWRKY81   | Pavirv00064554m.g | 999  | 332 | 1 | sg0.contig11990: 1431 - 2552   | 7.6e-78  |
| PvWRKY82-1 | Pavirv00029491m.g | 1143 | 380 | 2 | sg0.contig06834: 11315 - 14566 | 4.7e-227 |
| PvWRKY82-2 | Pavirv00007070m.g | 1197 | 398 | 2 | sg0.contig46195: 1024 - 5082   | 3.9e-245 |
| PvWRKY82-3 | Pavirv00061527m.g | 996  | 331 | 2 | sg0.contig01473: 9271 - 10686  | 3.0e-94  |
| PvWRKY83-1 | Pavirv00049214m.g | 1074 | 357 | 2 | sg0.contig73841: 1309 - 3642   | 7.9e-223 |
| PvWRKY83-2 | Pavirv00022316m.g | 1047 | 348 | 3 | sg0.contig03486: 10920 - 13670 | 3.6e-227 |
| PvWRKY84   | Pavirv00009420m.g | 648  | 215 | 0 | sg0.contig05260: 10446 - 11093 | 1.7e-69  |
| PvWRKY85   | Pavirv00008969m.g | 1479 | 492 | 3 | sg0.contig05523: 134 - 6603    | 5.2e-293 |
| PvWRKY86   | Pavirv00050108m.g | 981  | 326 | 2 | sg0.contig67227: 145 - 2157    | 7.3e-130 |
| PvWRKY87-1 | Pavirv00053696m.g | 1185 | 394 | 3 | sg0.contig11424: 8688 - 11335  | 4.0e-236 |
| PvWRKY87-2 | Pavirv00007485m.g | 1206 | 401 | 2 | sg0.contig43394: 2014 - 4385   | 2.1e-237 |
| PvWRKY88-1 | Pavirv00060853m.g | 720  | 239 | 2 | sg0.contig151986: 150 - 2762   | 4.3e-98  |
| PvWRKY88-2 | Pavirv00051308m.g | 1143 | 380 | 2 | sg0.contig22934: 4292 - 8437   | 3.4e-155 |
| PvWRKY90-1 | Pavirv00048744m.g | 771  | 256 | 2 | sg0.contig158726: 419 - 1688   | 3.3e-111 |
| PvWRKY90-2 | Pavirv00033119m.g | 471  | 156 | 1 | sg0.contig125052: 326 - 1007   | 1.7e-76  |
| PvWRKY90-3 | Pavirv00036392m.g | 1734 | 577 | 4 | sg0.contig90205: 1506 - 4003   | 0.0e+00  |
| PvWRKY91   | Pavirv00014140m.g | 783  | 260 | 2 | sg0.contig18533: 5511 - 8251   | 1.8e-127 |
| PvWRKY92-1 | Pavirv00002955m.g | 945  | 314 | 2 | sg0.contig34558: 5262 - 6431   | 2.1e-155 |
| PvWRKY92-2 | Pavirv00015878m.g | 984  | 327 | 2 | sg0.contig60612: 3406 - 4593   | 7.3e-171 |
| PvWRKY93-1 | Pavirv00024218m.g | 1122 | 373 | 2 | sg0.contig02645: 4337 - 6974   | 1.2e-188 |
| PvWRKY93-2 | Pavirv00053037m.g | 810  | 269 | 1 | sg0.contig111223: 2357 - 3389  | 6.7e-129 |

|                           |                   |      |      |   |                                |          |
|---------------------------|-------------------|------|------|---|--------------------------------|----------|
| PvWRKY94-1                | Pavirv00064303m.g | 4560 | 1519 | 4 | sg0.contig22731: 1949 - 8065   | 0.0e+00  |
| PvWRKY94-2                | Pavirv00057386m.g | 618  | 206  | 2 | sg0.contig28641: 5157 - 7720   | 8.9e-88  |
| PvWRKY94-3                | Pavirv00023378m.g | 1047 | 348  | 3 | sg0.contig02290: 6945 - 9748   | 2.2e-228 |
| PvWRKY95-1                | Pavirv00033647m.g | 471  | 157  | 1 | sg0.contig271618: 268 - 1661   | 4.0e-53  |
| PvWRKY95-2                | Pavirv00063150m.g | 729  | 242  | 1 | sg0.contig01581: 15669 - 16985 | 7.2e-51  |
| PvWRKY95-3                | Pavirv00029042m.g | 735  | 244  | 1 | sg0.contig07909: 12755 - 13713 | 1.8e-35  |
| PvWRKY96                  | Pavirv00036578m.g | 1278 | 426  | 2 | sg0.contig95399: 107 - 2572    | 1.3e-253 |
| PvWRKY97-1                | Pavirv00026819m.g | 1512 | 503  | 3 | sg0.contig24751: 1381 - 3219   | 4.6e-260 |
| PvWRKY97-2                | Pavirv00051698m.g | 1527 | 508  | 3 | sg0.contig23371: 5177 - 7061   | 2.1e-265 |
| PvWRKY102                 | Pavirv00035850m.g | 654  | 217  | 1 | sg0.contig91650: 1875 - 2657   | 1.1e-111 |
| PvWRKY103-1               | Pavirv00004891m.g | 564  | 187  | 1 | sg0.contig17756: 7943 - 8616   | 4.2e-85  |
| PvWRKY103-2               | Pavirv00030906m.g | 1497 | 498  | 7 | sg0.contig07579: 4336 - 8591   | 0.0e+00  |
| PvWRKY105-1               | Pavirv00003246m.g | 1434 | 477  | 4 | sg0.contig31589: 1336 - 5815   | 9.1e-269 |
| PvWRKY105-2               | Pavirv00058232m.g | 1218 | 405  | 3 | sg0.contig19912: 4649 - 9125   | 1.3e-225 |
| PvWRKY106                 | Pavirv00019417m.g | 504  | 167  | 0 | sg0.contig27527: 6138 - 6641   | 1.3e-63  |
| <i>Phaseolus vulgaris</i> |                   |      |      |   |                                |          |
| PvulWRKY1-1               | Phvul.008G286100  | 1518 | 505  | 4 | Chr08: 59105885 - 59109637     | 0.0e+00  |
| PvulWRKY1-2               | Phvul.008G270500  | 1371 | 456  | 5 | Chr08: 58044223 - 58046591     | 4.1e-305 |
| PvulWRKY1-3               | Phvul.005G116000  | 1854 | 617  | 4 | Chr05: 33530600 - 33533721     | 0.0e+00  |
| PvulWRKY1-4               | Phvul.011G101900  | 1800 | 599  | 4 | Chr11: 11097802 - 11100927     | 0.0e+00  |
| PvulWRKY1-5               | Phvul.006G147800  | 1836 | 611  | 6 | Chr06: 26094790 - 26097688     | 0.0e+00  |
| PvulWRKY1-6               | Phvul.006G047300  | 1335 | 444  | 5 | Chr06: 16091296 - 16095072     | 4.7e-290 |
| PvulWRKY2                 | Phvul.008G054100  | 2145 | 714  | 4 | Chr08: 4839408 - 4843253       | 0.0e+00  |
| PvulWRKY3                 | Phvul.002G103400  | 1314 | 437  | 3 | Chr02: 20868782 - 20871665     | 6.3e-297 |
| PvulWRKY4                 | Phvul.002G091100  | 1365 | 454  | 3 | Chr02: 15467166 - 15471721     | 3.2e-309 |
| PvulWRKY5-1               | Phvul.003G124000  | 1200 | 399  | 6 | Chr03: 30385985 - 30389924     | 2.1e-261 |
| PvulWRKY5-2               | Phvul.009G220700  | 1251 | 416  | 5 | Chr09: 32729678 - 32733766     | 1.8e-281 |
| PvulWRKY5-3               | Phvul.008G048100  | 672  | 223  | 3 | Chr08: 4250703 - 4259563       | 7.8e-133 |
| PvulWRKY7                 | Phvul.001G213600  | 786  | 261  | 2 | Chr01: 47682848 - 47684741     | 5.4e-170 |
| PvulWRKY9-1               | Phvul.002G202500  | 1461 | 486  | 4 | Chr02: 36234759 - 36237703     | 0.0e+00  |
| PvulWRKY9-2               | Phvul.008G043000  | 1620 | 539  | 3 | Chr08: 3709079 - 3711997       | 0.0e+00  |
| PvulWRKY11-1              | Phvul.009G233900  | 903  | 300  | 2 | Chr09: 34493623 - 34495359     | 4.8e-200 |
| PvulWRKY11-2              | Phvul.003G139500  | 963  | 320  | 2 | Chr03: 33212871 - 33214510     | 1.4e-127 |

|              |                   |      |     |   |                            |          |
|--------------|-------------------|------|-----|---|----------------------------|----------|
| PvuIWRKY11-3 | Phvul.009G101900  | 891  | 296 | 2 | Chr09: 15494961 - 15496400 | 1.4e-197 |
| PvuIWRKY13-1 | Phvul.009G138600  | 708  | 235 | 2 | Chr09: 20401487 - 20404607 | 3.8e-159 |
| PvuIWRKY13-2 | Phvul.002G266400  | 690  | 229 | 2 | Chr02: 43213877 - 43215924 | 1.9e-155 |
| PvuIWRKY14   | Phvul.006G123000  | 1488 | 495 | 2 | Chr06: 23845672 - 23849501 | 0.0e+00  |
| PvuIWRKY15-1 | Phvul.002G016100  | 978  | 325 | 2 | Chr02: 1777772 - 1779281   | 4.8e-212 |
| PvuIWRKY15-2 | Phvul.003G240900  | 960  | 319 | 2 | Chr03: 46413673 - 46415523 | 5.8e-210 |
| PvuIWRKY17   | Phvul.001G060200  | 960  | 319 | 2 | Chr01: 7241162 - 7243932   | 7.1e-214 |
| PvuIWRKY19-1 | Phvul.008G081800  | 915  | 304 | 2 | Chr08: 7871958 - 7873756   | 8.4e-200 |
| PvuIWRKY19-2 | Phvul.010G057900  | 858  | 285 | 2 | Chr10: 9634279 - 9635768   | 6.4e-193 |
| PvuIWRKY18   | Phvul.009G087400  | 873  | 290 | 3 | Chr09: 13639295 - 13640736 | 1.5e-192 |
| PvuIWRKY20-1 | Phvul.008G275300  | 1755 | 584 | 5 | Chr08: 58435600 - 58441263 | 0.0e+00  |
| PvuIWRKY20-2 | Phvul.006G053300  | 1746 | 581 | 5 | Chr06: 16845731 - 16851077 | 0.0e+00  |
| PvuIWRKY21   | Phvul.007G177900  | 1077 | 358 | 2 | Chr07: 41387786 - 41390521 | 3.3e-240 |
| PvuIWRKY22-1 | Phvul.010G104200  | 1089 | 362 | 2 | Chr10: 36231937 - 36233733 | 2.3e-240 |
| PvuIWRKY22-2 | Phvul.008G058300  | 1041 | 346 | 2 | Chr08: 5181941 - 5183860   | 3.1e-226 |
| PvuIWRKY23-1 | Phvul.007G212900  | 960  | 319 | 2 | Chr07: 45186238 - 45188369 | 1.4e-212 |
| PvuIWRKY23-2 | Phvul.001G214400  | 882  | 293 | 2 | Chr01: 47770993 - 47773054 | 2.2e-196 |
| PvuIWRKY26-1 | Phvul.008G251300  | 1719 | 572 | 4 | Chr08: 56596899 - 56600140 | 0.0e+00  |
| PvuIWRKY26-2 | Phvul.006G074600  | 1614 | 537 | 4 | Chr06: 19393601 - 19396850 | 0.0e+00  |
| PvuIWRKY27-1 | Phvul.004G105800  | 1206 | 401 | 2 | Chr04: 34620507 - 34622280 | 2.1e-272 |
| PvuIWRKY27-2 | Phvul.007G075400  | 948  | 315 | 2 | Chr07: 6907213 - 6908842   | 1.9e-212 |
| PvuIWRKY28   | Phvul.001G042100  | 810  | 269 | 3 | Chr01: 4312182 - 4314073   | 2.7e-174 |
| PvuIWRKY29-1 | Phvul.002G160100  | 720  | 239 | 1 | Chr02: 30201373 - 30202358 | 1.7e-162 |
| PvuIWRKY29-2 | Phvul.002G293200  | 879  | 292 | 1 | Chr02: 45663178 - 45664544 | 3.3e-201 |
| PvuIWRKY32-1 | Phvul.003G156300  | 1515 | 504 | 4 | Chr03: 36109027 - 36115421 | 0.0e+00  |
| PvuIWRKY32-2 | SPhvul.009G195200 | 1425 | 474 | 4 | Chr09: 28905568 - 28913126 | 0.0e+00  |
| PvuIWRKY33-1 | Phvul.010G062500  | 1491 | 496 | 4 | Chr10: 11258171 - 11261871 | 0.0e+00  |
| PvuIWRKY33-2 | Phvul.008G090300  | 1620 | 539 | 4 | Chr08: 9198199 - 9201344   | 0.0e+00  |
| PvuIWRKY33-3 | Phvul.008G251700  | 990  | 329 | 0 | Chr08: 56633693 - 56635151 | 2.0e-225 |
| PvuIWRKY33-4 | Phvul.008G251800  | 960  | 329 | 4 | Chr08: 56635386 - 56639980 | 1.6e-216 |
| PvuIWRKY34   | Phvul.005G005800  | 2223 | 740 | 5 | Chr05: 452542 - 457216     | 0.0e+00  |
| PvuIWRKY35   | Phvul.002G202000  | 1308 | 435 | 2 | Chr02: 36152085 - 36156289 | 6.0e-295 |
| PvuIWRKY40-1 | Phvul.005G181800  | 912  | 303 | 4 | Chr05: 40322573 - 40324669 | 1.8e-195 |

|              |                   |      |     |   |                            |          |
|--------------|-------------------|------|-----|---|----------------------------|----------|
| PvuIWRKY40-2 | Phvul.010G161100  | 945  | 314 | 5 | Chr10: 42927172 - 42930758 | 1.2e-204 |
| PvuIWRKY43-1 | Phvul.010G104700  | 609  | 202 | 1 | Chr10: 36413066 - 36414301 | 6.3e-136 |
| PvuIWRKY43-2 | Phvul.008G058000  | 540  | 179 | 2 | Chr08: 5159821 - 5163155   | 1.0e-93  |
| PvuIWRKY44   | Phvul.001G173700  | 1413 | 470 | 6 | Chr01: 43670815 - 43675762 | 0.0e+00  |
| PvuIWRKY45-1 | Phvul.008G185800  | 771  | 256 | 2 | Chr08: 48910744 - 48918666 | 7.2e-173 |
| PvuIWRKY45-2 | Phvul.008G185700  | 933  | 310 | 2 | Chr08: 48904565 - 48906193 | 6.0e-213 |
| PvuIWRKY45-3 | Phvul.009G043100  | 849  | 282 | 2 | Chr09: 8430030 - 8432516   | 2.0e-189 |
| PvuIWRKY46-1 | Phvul.006G111700  | 1122 | 373 | 2 | Chr06: 22762481 - 22764805 | 9.5e-256 |
| PvuIWRKY46-2 | Phvul.010G111900  | 1110 | 369 | 2 | Chr10: 37576223 - 37578860 | 6.3e-246 |
| PvuIWRKY47-1 | Phvul.001G218500  | 1560 | 519 | 5 | Chr01: 48108877 - 48112906 | 0.0e+00  |
| PvuIWRKY47-2 | Phvul.007G209000  | 1389 | 462 | 6 | Chr07: 44775550 - 44778536 | 5.6e-313 |
| PvuIWRKY48-1 | Phvul.003G116300  | 1197 | 398 | 2 | Chr03: 29019242 - 29021426 | 1.3e-266 |
| PvuIWRKY48-2 | Phvul.006G119100  | 1056 | 351 | 2 | Chr06: 23452021 - 23455089 | 1.9e-240 |
| PvuIWRKY49   | Phvul.008G119400  | 936  | 311 | 2 | Chr08: 15127288 - 15130305 | 1.0e-210 |
| PvuIWRKY50   | Phvul.002G265400  | 564  | 187 | 2 | Chr02: 43085670 - 43087004 | 9.9e-125 |
| PvuIWRKY51-1 | Phvul.009G080000  | 477  | 158 | 2 | Chr09: 12910792 - 12911776 | 1.2e-104 |
| PvuIWRKY51-2 | Phvul.001G039900  | 459  | 152 | 2 | Chr01: 4074888 - 4076353   | 2.2e-102 |
| PvuIWRKY58   | Phvul.008G039900  | 1557 | 518 | 3 | Chr08: 3354570 - 3359078   | 0.0e+00  |
| PvuIWRKY59-1 | Phvul.007G118200  | 1098 | 365 | 3 | Chr07: 18968507 - 18974116 | 8.0e-252 |
| PvuIWRKY59-2 | Phvul.007G118100  | 1074 | 357 | 4 | Chr07: 18951902 - 18954607 | 4.8e-245 |
| PvuIWRKY60   | Phvul.001G042200  | 843  | 280 | 3 | Chr01: 4326381 - 4327985   | 3.1e-185 |
| PvuIWRKY65   | Phvul.002G240900  | 774  | 257 | 2 | Chr02: 40784105 - 40786025 | 3.1e-173 |
| PvuIWRKY68   | Phvul.009G138900  | 582  | 193 | 2 | Chr09: 20451693 - 20454202 | 2.8e-209 |
| PvuIWRKY69-1 | Phvul.002G163400  | 1041 | 346 | 2 | Chr02: 30515098 - 30516646 | 1.6e-236 |
| PvuIWRKY69-2 | Phvul.002G297100  | 1086 | 361 | 2 | Chr02: 46023368 - 46025419 | 2.3e-250 |
| PvuIWRKY69-3 | Phvul.009G137500  | 1059 | 352 | 2 | Chr09: 20185631 - 20187441 | 4.4e-172 |
| PvuIWRKY69-3 | Phvul.005G093800  | 762  | 253 | 2 | Chr05: 27948848 - 27951057 | 4.4e-172 |
| PvuIWRKY71-1 | PPhvul.002G196800 | 1077 | 358 | 2 | Chr02: 35413372 - 35415513 | 7.3e-243 |
| PvuIWRKY71-2 | Phvul.008G192800  | 1002 | 333 | 2 | Chr08: 49929870 - 49931980 | 4.3e-225 |
| PvuIWRKY73-1 | Phvul.003G192000  | 1935 | 644 | 4 | Chr03: 40445375 - 40449886 | 0.0e+00  |
| PvuIWRKY73-2 | Phvul.009G189700  | 1788 | 595 | 4 | Chr09: 28139133 - 28142787 | 0.0e+00  |
| PvuIWRKY73-3 | Phvul.003G068700  | 1392 | 463 | 3 | Chr03: 10126584 - 10128409 | 1.8e-312 |
| PvuIWRKY73-4 | Phvul.002G089700  | 1317 | 438 | 2 | Chr02: 14907240 - 14909229 | 3.7e-299 |



|                              |                  |      |     |   |                                |          |
|------------------------------|------------------|------|-----|---|--------------------------------|----------|
| PvuIWRKY75                   | Phvul.001G088200 | 771  | 256 | 1 | Chr01: 15930050 - 15932342     | 8.3e-172 |
| PvuIWRKY79-1                 | Phvul.005G080200 | 906  | 301 | 2 | Chr05: 18309095 - 18311322     | 7.9e-207 |
| PvuIWRKY79-2                 | Phvul.005G080400 | 843  | 280 | 2 | Chr05: 18435912 - 18437363     | 4.6e-190 |
| PvuIWRKY79-3                 | Phvul.005G080300 | 915  | 304 | 2 | Chr05: 18328284 - 18331020     | 5.0e-202 |
| PvuIWRKY97                   | Phvul.002G081600 | 879  | 292 | 4 | Chr02: 12429691 - 12436481     | 1.5e-196 |
| <i>Physcomitrella patens</i> |                  |      |     |   |                                |          |
| PpWRKY3                      | Pp1s135_80V6     | 2247 | 748 | 5 | scaffold_135: 645772 - 650727  | 4.7e-170 |
| PpWRKY4                      | Pp1s426_27V6     | 1314 | 437 | 2 | scaffold_426: 133251 - 135010  | 8.1e-54  |
| PpWRKY9-1                    | Pp1s2_539V6      | 1230 | 409 | 6 | scaffold_2: 3255923 - 3259213  | 2.8e-223 |
| PpWRKY9-2                    | Pp1s11_241V6     | 1476 | 491 | 2 | scaffold_11: 1923004 - 1925119 | 2.1e-67  |
| PpWRKY13                     | Pp1s5_354V6      | 1731 | 576 | 3 | scaffold_5: 2573388 - 2577075  | 6.0e-64  |
| PpWRKY15                     | Pp1s48_141V6     | 1188 | 395 | 4 | scaffold_48: 1159423 - 1162577 | 1.5e-261 |
| PpWRKY20                     | Pp1s35_336V6     | 2118 | 705 | 4 | scaffold_35: 1948237 - 1952437 | 2.9e-112 |
| PpWRKY21-1                   | Pp1s163_112V6    | 1191 | 396 | 4 | scaffold_163: 806509 - 808836  | 6.5e-266 |
| PpWRKY21-2                   | Pp1s42_169V6     | 1032 | 343 | 2 | scaffold_42: 1397607 - 1401930 | 1.7e-45  |
| PpWRKY21-3                   | Pp1s7_13V6       | 1188 | 395 | 3 | scaffold_7: 59439 - 61638      | 4.2e-264 |
| PpWRKY23                     | Pp1s39_217V6     | 1521 | 506 | 2 | scaffold_39: 1014881 - 1017338 | 3.5e-76  |
| PpWRKY28-1                   | Pp1s235_126V6    | 1854 | 617 | 2 | scaffold_235: 597735 - 600433  | 4.9e-54  |
| PpWRKY28-2                   | Pp1s159_105V6    | 2172 | 723 | 2 | scaffold_159: 530929 - 533445  | 7.0e-60  |
| PpWRKY28-3                   | Pp1s109_123V6    | 1602 | 533 | 2 | scaffold_109: 814971 - 818298  | 1.9e-66  |
| PpWRKY33                     | Pp1s157_29V6     | 2055 | 684 | 3 | scaffold_157: 177897 - 181275  | 2.3e-118 |
| PpWRKY42-1                   | Pp1s158_166V6    | 2298 | 765 | 5 | scaffold_158: 827946 - 831738  | 1.1e-70  |
| PpWRKY42-2                   | Pp1s47_251V6     | 2511 | 836 | 7 | scaffold_47: 1597512 - 1602301 | 8.4e-76  |
| PpWRKY42-3                   | Pp1s246_89V6     | 2247 | 748 | 3 | scaffold_246: 427002 - 430434  | 4.1e-69  |
| PpWRKY46-1                   | Pp1s84_106V6     | 1608 | 535 | 4 | scaffold_84: 596548 - 599697   | 0.0e+00  |
| PpWRKY46-2                   | Pp1s195_75V6     | 1827 | 608 | 6 | scaffold_195: 526157 - 529122  | 5.3e-293 |
| PpWRKY50                     | Pp1s426_30V6     | 1755 | 584 | 2 | scaffold_426: 161343 - 164316  | 6.4e-183 |
| PpWRKY55-1                   | Pp1s36_309V6     | 1596 | 531 | 5 | scaffold_36: 2059942 - 2063011 | 1.4e-303 |
| PpWRKY55-2                   | Pp1s280_53V6     | 1464 | 487 | 3 | scaffold_280: 365791 - 367965  | 0.0e+00  |
| PpWRKY48-1                   | Pp1s244_77V6     | 486  | 161 | 1 | scaffold_244: 571901 - 573568  | 2.8e-56  |
| PpWRKY48-2                   | Pp1s39_212V6     | 1536 | 511 | 2 | scaffold_39: 994890 - 997050   | 7.2e-51  |
| PpWRKY57-1                   | Pp1s407_55V6     | 1515 | 504 | 2 | scaffold_407: 349280 - 352092  | 1.6e-56  |
| PpWRKY57-2                   | Pp1s35_401V6     | 2574 | 857 | 4 | scaffold_35: 2394239 - 2399016 | 1.5e-53  |

|                    |                  |      |     |   |                                |          |
|--------------------|------------------|------|-----|---|--------------------------------|----------|
| PpWRKY57-3         | Pp1s73_70V6      | 1677 | 558 | 2 | scaffold_73: 359539 - 362169   | 4.0e-63  |
| PpWRKY57-4         | Pp1s140_87V6     | 1731 | 576 | 2 | scaffold_140: 533870 - 536059  | 1.2e-80  |
| PpWRKY57-5         | Pp1s115_10V6     | 2082 | 693 | 3 | scaffold_115: 59551 - 63343    | 1.1e-53  |
| PpWRKY57-6         | Pp1s166_34V6     | 1767 | 588 | 2 | scaffold_166: 286374 - 288922  | 1.1e-53  |
| PpWRKY57-7         | Pp1s198_83V6     | 2277 | 758 | 2 | scaffold_198: 445752 - 450271  | 2.1e-59  |
| PpWRKY57-8         | Pp1s137_252V6    | 1701 | 566 | 2 | scaffold_137: 889823 - 891759  | 6.9e-49  |
| PpWRKY57-9         | Pp1s25_173V6     | 1749 | 582 | 4 | scaffold_25: 1200807 - 1204925 | 4.5e-51  |
| PpWRKY74           | Pp1s65_236V6     | 1158 | 385 | 3 | scaffold_65: 1330173 - 1332187 | 4.7e-257 |
| <i>Picea abies</i> |                  |      |     |   |                                |          |
| PaWRKY6-1          | MA_103616g0010   | 1941 | 646 | 5 | MA_10361:27192..30835          | 1.7e-192 |
| PaWRKY6-2          | MA_161426g0010   | 1083 | 360 | 4 | MA_161426:4031..10043          | 2.3e-93  |
| PaWRKY6-3          | MA_14480g0020    | 1158 | 385 | 4 | MA_14480:16357..18219          | 4.4e-62  |
| PaWRKY6-4          | MA_47052g0010    | 1089 | 362 | 3 | MA_47052:12328..13765          | 4.2e-58  |
| PaWRKY6-5          | MA_6918834g0010  | 672  | 223 | 2 | MA_6918834: -19..1545          | 2.8e-46  |
| PaWRKY6-6          | MA_558583g0010   | 894  | 297 | 3 | MA_558583:1596..3027           | 2.0e-58  |
| PaWRKY6-7          | MA_175750g0010   | 1029 | 342 | 3 | MA_175750:11808..14051         | 9.2e-59  |
| PaWRKY6-8          | MA_10436051g0010 | 1065 | 354 | 4 | MA_10436051: 7403..8951        | 1.5e-84  |
| PaWRKY6-9          | MA_212937g0010   | 1878 | 625 | 5 | MA_212937:1948..4339           | 1.3e-206 |
| PaWRKY7            | MA_88419g0010    | 969  | 322 | 2 | MA_88419: 10736..13638         | 4.9e-211 |
| PaWRKY9            | MA_381058g0010   | 591  | 196 | 2 | MA_381058:3296..4322           | 1.9e-28  |
| PaWRKY10           | MA_76002g0010    | 333  | 110 | 1 | MA_76002:12209..12733          | 2.1e-33  |
| PaWRKY11-1         | MA_10436931g0040 | 294  | 97  | 1 | MA_10436931:15746..16409       | 1.1e-53  |
| PaWRKY11-2         | MA_107950g0010   | 1182 | 393 | 2 | MA_107950:1058..3100           | 2.0e-247 |
| PaWRKY11-3         | MA_10428770g0010 | 643  | 213 | 2 | MA_10428770: -19..1984         | 3.2e-51  |
| PaWRKY13           | MA_133396g0010   | 786  | 261 | 3 | MA_133396:18090..19553         | 2.9e-60  |
| PaWRKY14-1         | MA_138256g0010   | 1326 | 441 | 2 | MA_138256:4131..6703           | 5.5e-58  |
| PaWRKY14-2         | MA_109104g0010   | 1470 | 489 | 3 | MA_109104:3506..6286           | 9.8e-84  |
| PaWRKY20-1         | MA_120969g0010   | 1584 | 527 | 5 | MA_120969:10441..13650         | 0.0e+00  |
| PaWRKY20-2         | MA_10426648g0010 | 1744 | 580 | 5 | MA_10426648: -19..24269        | 5.0e-205 |
| PaWRKY21-1         | MA_11492g0010    | 1347 | 448 | 5 | MA_11492:70221..74699          | 3.9e-107 |
| PaWRKY21-2         | MA_10428170g0010 | 1029 | 342 | 2 | MA_10428170:26510..31119       | 4.6e-223 |
| PaWRKY22           | MA_8710165g0010  | 711  | 236 | 1 | MA_8710165:47..977             | 9.9e-64  |
| PaWRKY23           | MA_54954g0010    | 573  | 190 | 2 | MA_54954:514..1812             | 4.2e-46  |

|            |                  |      |     |   |                          |          |
|------------|------------------|------|-----|---|--------------------------|----------|
| PaWRKY24   | MA_10426942g0010 | 771  | 256 | 2 | MA_10426942:6661..9859   | 4.8e-56  |
| PaWRKY26-1 | MA_16118g0010    | 2700 | 899 | 5 | MA_16118:25474..35490    | 0.0e+00  |
| PaWRKY26-2 | MA_53351g0010    | 1956 | 651 | 5 | MA_53351:4859..16486     | 1.9e-104 |
| PaWRKY31-1 | MA_164675g0010   | 1074 | 357 | 3 | MA_164675:15102..17482   | 6.6e-97  |
| PaWRKY31-2 | MA_134559g0010   | 870  | 289 | 3 | MA_134559:1038..2826     | 1.5e-40  |
| PaWRKY33   | MA_10434651g0010 | 1896 | 631 | 4 | MA_10434651:16875..34465 | 4.3e-106 |
| PaWRKY35-1 | MA_136551g0010   | 666  | 221 | 2 | MA_136551:4606..7880     | 3.8e-47  |
| PaWRKY35-2 | MA_10432914g0010 | 1389 | 462 | 2 | MA_10432914:5215..7238   | 1.9e-66  |
| PaWRKY35-3 | MA_10433300g0020 | 873  | 290 | 1 | MA_10433300:18109..19234 | 5.3e-68  |
| PaWRKY42-1 | MA_5558504g0010  | 645  | 214 | 2 | MA_5558504:-19..860      | 1.1e-40  |
| PaWRKY42-2 | MA_47307g0010    | 1194 | 397 | 4 | MA_47307:21340..23609    | 1.3e-66  |
| PaWRKY42-3 | MA_52928g0010    | 1125 | 374 | 3 | MA_52928:6670..8698      | 2.3e-59  |
| PaWRKY42-4 | MA_934202g0010   | 1104 | 367 | 4 | MA_934202:479..2352      | 5.8e-137 |
| PaWRKY42-5 | MA_6790522g0010  | 636  | 211 | 1 | MA_6790522:407..1200     | 6.2e-25  |
| PaWRKY42-6 | MA_46529g0010    | 978  | 325 | 3 | MA_46529:13169..14784    | 9.4e-89  |
| PaWRKY42-7 | MA_136063g0010   | 519  | 172 | 1 | MA_136063:13616..14292   | 7.0e-46  |
| PaWRKY49   | MA_10434450g0010 | 1359 | 452 | 2 | MA_10434450:7431..11373  | 2.8e-40  |
| PaWRKY50   | MA_306130g0010   | 486  | 161 | 2 | MA_306130:1659..2410     | 5.4e-45  |
| PaWRKY51-1 | MA_65782g0010    | 843  | 280 | 2 | MA_65782:16207..17418    | 5.6e-50  |
| PaWRKY51-2 | MA_23415g0010    | 798  | 265 | 2 | MA_23415:9281..10359     | 2.6e-81  |
| PaWRKY55-1 | MA_6177g0010     | 1719 | 572 | 5 | MA_6177:31773..40849     | 1.5e-29  |
| PaWRKY55-2 | MA_2290g0010     | 1071 | 356 | 4 | MA_2290:12895..21921     | 1.3e-42  |
| PaWRKY57-1 | MA_126273g0010   | 1416 | 471 | 3 | MA_126273:22086..24134   | 5.4e-72  |
| PaWRKY57-2 | MA_10434976g0010 | 1362 | 453 | 2 | MA_10434976:6409..8267   | 1.7e-113 |
| PaWRKY57-3 | MA_120697g0010   | 1365 | 454 | 2 | MA_120697:8599..10217    | 5.4e-113 |
| PaWRKY57-4 | MA_20468g0010    | 732  | 243 | 2 | MA_20468:4225..6187      | 2.8e-48  |
| PaWRKY57-5 | MA_93790g0010    | 525  | 174 | 2 | MA_93790:13764..14883    | 1.3e-46  |
| PaWRKY57-6 | MA_10432362g0010 | 657  | 218 | 2 | MA_10432362:30..1918     | 4.0e-48  |
| PaWRKY65   | MA_124797g0010   | 1125 | 374 | 3 | MA_124797:9012..11092    | 1.8e-113 |
| PaWRKY69   | MA_6943842g0010  | 1056 | 351 | 1 | MA_6943842:800..2021     | 6.6e-82  |
| PaWRKY71-1 | MA_740729g0010   | 267  | 88  | 1 | MA_740729:1169..1573     | 1.3e-52  |
| PaWRKY71-2 | MA_7513437g0010  | 611  | 203 | 2 | MA_7513437:-19..964      | 5.7e-49  |
| PaWRKY71-3 | MA_179641g0010   | 624  | 207 | 2 | MA_179641:6210..7224     | 6.2e-48  |

|                            |                   |      |     |   |                            |          |
|----------------------------|-------------------|------|-----|---|----------------------------|----------|
| PaWRKY71-4                 | MA_496691g0010    | 582  | 193 | 2 | MA_496691:6053..7260       | 1.0e-29  |
| PaWRKY72-1                 | MA_10428091g0010  | 435  | 144 | 3 | MA_10428091:4888..7987     | 3.4e-137 |
| PaWRKY72-2                 | MA_74833g0010     | 2196 | 731 | 4 | MA_74833:9458..13719       | 1.8e-137 |
| PaWRKY72                   | MA_892467g0010    | 2121 | 706 | 5 | MA_892467:2865..7140       | 8.9e-49  |
| PaWRKY75                   | MA_10425932g0020  | 819  | 272 | 3 | MA_10425932:24588..38975   | 1.2e-177 |
| <i>Populus trichocarpa</i> |                   |      |     |   |                            |          |
| PtWRKY1-1                  | Potri.014G164300  | 1458 | 485 | 5 | Chr14: 12985555 - 12989438 | 0.0e+00  |
| PtWRKY1-2                  | Potri.002G221600  | 1107 | 368 | 4 | Chr02: 20862009 - 20864972 | 5.0e-203 |
| PtWRKY2                    | Potri.011G169300  | 2178 | 725 | 5 | Chr11: 18450851 - 18455892 | 0.0e+00  |
| PtWRKY3                    | Potri.010G163000  | 1500 | 499 | 3 | Chr10: 16770595 - 16774139 | 0.0e+00  |
| PtWRKY4-1                  | Potri.017G088300  | 1608 | 535 | 3 | Chr17: 10559295 - 10564769 | 0.0e+00  |
| PtWRKY4-2                  | Potri.004G120800  | 1632 | 543 | 3 | Chr04: 11338804 - 11343998 | 3.4e-299 |
| PtWRKY4-3                  | Potri.008G091900  | 1479 | 492 | 3 | Chr08: 5759575 - 5763061   | 0.0e+00  |
| PtWRKY5-1                  | Potri.002G138900  | 612  | 203 | 3 | Chr02: 10319005 - 10322693 | 1.2e-138 |
| PtWRKY5-2                  | PPotri.014G050000 | 687  | 228 | 3 | Chr14: 4012998 - 4017289   | 9.0e-155 |
| PtWRKY6-1                  | Potri.004G007500  | 1737 | 578 | 6 | Chr04: 479125 - 481848     | 0.0e+00  |
| PtWRKY6-2                  | Potri.011G007800  | 1782 | 593 | 5 | Chr11: 576073 - 578528     | 0.0e+00  |
| PtWRKY6-3                  | Potri.002G228400  | 1854 | 617 | 4 | Chr02: 21820126 - 21822588 | 0.0e+00  |
| PtWRKY6-4                  | Potri.014G155100  | 1875 | 624 | 4 | Chr14: 12072684 - 12075554 | 0.0e+00  |
| PtWRKY7-1                  | Potri.002G123300  | 1077 | 358 | 2 | Chr02: 9218413 - 9220464   | 1.5e-238 |
| PtWRKY7-2                  | PPotri.014G024200 | 1167 | 388 | 3 | Chr14: 2074611 - 2077146   | 3.0e-257 |
| PtWRKY9                    | Potri.001G208600  | 1560 | 519 | 4 | Chr01: 20898737 - 20901171 | 0.0e+00  |
| PtWRKY10                   | Potri.001G002400  | 408  | 135 | 3 | Chr01: 152953 - 155561     | 4.3e-87  |
| PtWRKY11-1                 | Potri.006G072400  | 906  | 301 | 2 | Chr06: 5375343 - 5377292   | 2.1e-199 |
| PtWRKY11-2                 | Potri.018G139300  | 903  | 300 | 2 | Chr18: 15890044 - 15892257 | 5.0e-200 |
| PtWRKY11-3                 | Potri.018G008500  | 1017 | 338 | 2 | Chr18: 587550 - 590270     | 4.2e-225 |
| PtWRKY13-1                 | Potri.005G086400  | 672  | 223 | 2 | Chr05: 6445488 - 6450574   | 1.9e-139 |
| PtWRKY13-2                 | Potri.007G078200  | 702  | 233 | 3 | Chr07: 10194776 - 10198496 | 1.1e-157 |
| PtWRKY14-1                 | Potri.011G157100  | 1353 | 450 | 3 | Chr11: 17485027 - 17487804 | 3.7e-299 |
| PtWRKY14-2                 | Potri.001G460600  | 1272 | 423 | 3 | Chr01: 49433744 - 49436406 | 2.6e-288 |
| PtWRKY14-3                 | Potri.003G132700  | 993  | 330 | 2 | Chr03: 15201353 - 15202963 | 6.4e-221 |
| PtWRKY15-1                 | Potri.005G141400  | 996  | 331 | 2 | Chr05: 11954643 - 11956649 | 1.1e-217 |
| PtWRKY15-2                 | Potri.007G047400  | 1008 | 335 | 2 | Chr07: 4352721 - 4355025   | 8.0e-221 |

|            |                  |      |     |   |                            |          |
|------------|------------------|------|-----|---|----------------------------|----------|
| PtWRKY18   | Potri.006G263600 | 963  | 320 | 4 | Chr06: 26679119 - 26680878 | 7.7e-205 |
| PtWRKY19   | Potri.014G009500 | 513  | 170 | 2 | Chr14: 968858 - 969713     | 5.4e-113 |
| PtWRKY20-1 | Potri.011G087900 | 1686 | 561 | 5 | Chr11: 10507794 - 10514869 | 0.0e+00  |
| PtWRKY20-2 | Potri.001G361600 | 1677 | 558 | 5 | Chr01: 37367919 - 37373720 | 0.0e+00  |
| PtWRKY20-3 | Potri.019G053900 | 1551 | 516 | 5 | Chr19: 8279037 - 8281782   | 1.5e-213 |
| PtWRKY20-4 | Potri.013G086000 | 2151 | 716 | 4 | Chr13: 8100301 - 8104436   | 0.0e+00  |
| PtWRKY21-1 | Potri.002G043500 | 1056 | 351 | 2 | Chr02: 2783127 - 2786060   | 6.8e-232 |
| PtWRKY21-2 | Potri.005G219500 | 1044 | 347 | 2 | Chr05: 23151059 - 23153203 | 5.9e-231 |
| PtWRKY22-1 | Potri.002G164400 | 1065 | 354 | 2 | Chr02: 12421400 - 12423249 | 7.8e-240 |
| PtWRKY22-2 | Potri.014G090300 | 1050 | 349 | 2 | Chr14: 7098996 - 7100670   | 2.6e-235 |
| PtWRKY23-1 | Potri.002G193000 | 954  | 317 | 2 | Chr02: 15398964 - 15402809 | 4.7e-209 |
| PtWRKY23-2 | Potri.014G118200 | 960  | 319 | 2 | Chr14: 9188997 - 9190859   | 4.1e-193 |
| PtWRKY26-1 | Potri.019G123500 | 1443 | 480 | 4 | Chr19: 15161763 - 15164710 | 0.0e+00  |
| PtWRKY26-2 | Potri.013G153400 | 1776 | 591 | 4 | Chr13: 15672152 - 15675074 | 0.0e+00  |
| PtWRKY27-1 | Potri.004G072000 | 1293 | 430 | 2 | Chr04: 6057099 - 6058855   | 8.6e-291 |
| PtWRKY27-2 | Potri.017G149000 | 1239 | 412 | 2 | Chr17: 15509535 - 15511261 | 6.4e-279 |
| PtWRKY29   | Potri.001G099000 | 504  | 167 | 1 | Chr01: 7812739 - 7813453   | 9.9e-109 |
| PtWRKY32-1 | Potri.018G107000 | 1596 | 531 | 4 | Chr18: 13340738 - 13347744 | 0.0e+00  |
| PtWRKY32-2 | Potri.006G184800 | 1569 | 522 | 4 | Chr06: 19846841 - 19852326 | 0.0e+00  |
| PtWRKY32-3 | Potri.006G264000 | 1434 | 477 | 4 | Chr06: 26721773 - 26724592 | 0.0e+00  |
| PtWRKY32-4 | Potri.018G019000 | 1401 | 466 | 4 | Chr18: 1444549 - 1447195   | 2.0e-282 |
| PtWRKY33-1 | Potri.016G128300 | 1740 | 579 | 4 | Chr16: 13096393 - 13099016 | 0.0e+00  |
| PtWRKY33-2 | Potri.006G105300 | 1641 | 546 | 4 | Chr06: 8125329 - 8128097   | 0.0e+00  |
| PtWRKY34   | Potri.001G472800 | 2199 | 732 | 5 | Chr01: 50403473 - 50408374 | 0.0e+00  |
| PtWRKY35   | Potri.017G104800 | 714  | 237 | 2 | Chr17: 12179899 - 12182330 | 9.4e-178 |
| PtWRKY39   | Potri.013G042600 | 1065 | 354 | 2 | Chr13: 2993743 - 2996226   | 6.4e-239 |
| PtWRKY40-1 | Potri.003G182200 | 960  | 319 | 4 | Chr03: 18904988 - 18907381 | 2.5e-208 |
| PtWRKY40-2 | Potri.001G044500 | 957  | 318 | 3 | Chr01: 3209312 - 3211607   | 1.5e-208 |
| PtWRKY40-3 | Potri.018G019700 | 816  | 271 | 3 | Chr18: 1491298 - 1492943   | 7.9e-180 |
| PtWRKY41-1 | Potri.014G096200 | 1098 | 365 | 2 | Chr14: 7526597 - 7529192   | 1.6e-250 |
| PtWRKY41-2 | Potri.002G168700 | 1092 | 363 | 2 | Chr02: 12778165 - 12781030 | 1.6e-248 |
| PtWRKY43-1 | Potri.014G090700 | 570  | 189 | 1 | Chr14: 7118925 - 7121224   | 6.7e-128 |
| PtWRKY43-2 | Potri.002G164900 | 582  | 193 | 1 | Chr02: 12450751 - 12452084 | 1.5e-129 |

|            |                    |      |     |   |                            |          |
|------------|--------------------|------|-----|---|----------------------------|----------|
| PtWRKY44-1 | Potri.016G083600   | 1410 | 469 | 7 | Chr16: 6509598 - 6514741   | 1.1e-252 |
| PtWRKY44-2 | Potri.006G133200   | 1428 | 475 | 6 | Chr06: 10969866 - 10974789 | 0.0e+00  |
| PtWRKY45-1 | PPotri.012G101000  | 561  | 186 | 1 | Chr12: 12608185 - 12609465 | 7.6e-126 |
| PtWRKY45-2 | Potri.015G099200   | 537  | 178 | 1 | Chr15: 11835261 - 11837075 | 5.1e-119 |
| PtWRKY47-1 | Potri.014G111900   | 1509 | 502 | 5 | Chr14: 8765075 - 8768810   | 0.0e+00  |
| PtWRKY47-2 | Potri.002G186600   | 1521 | 506 | 5 | Chr02: 14641279 - 14644811 | 0.0e+00  |
| PtWRKY48-1 | Potri.010G147700   | 1125 | 374 | 2 | Chr10: 15695587 - 15697571 | 9.2e-249 |
| PtWRKY48-2 | Potri.008G103300   | 1107 | 368 | 2 | Chr08: 6548117 - 6549941   | 3.2e-245 |
| PtWRKY49-1 | Potri.006G087000   | 915  | 304 | 2 | Chr06: 6643583 - 6645418   | 2.3e-202 |
| PtWRKY49-2 | Potri.016G099900   | 930  | 309 | 2 | Chr16: 9770417 - 9772150   | 2.6e-206 |
| PtWRKY50   | Potri.006G224100   | 498  | 165 | 2 | Chr06: 23609786 - 23611128 | 5.1e-109 |
| PtWRKY51-1 | Potri.007G079800   | 579  | 192 | 2 | Chr07: 10382370 - 10385056 | 1.0e-122 |
| PtWRKY51-2 | Potri.005G085200   | 621  | 206 | 2 | Chr05: 6324424 - 6327310   | 7.9e-135 |
| PtWRKY53-1 | Potri.001G092900   | 1017 | 338 | 2 | Chr01: 7326486 - 7329009   | 3.6e-231 |
| PtWRKY53-2 | Potri.003G138600   | 1029 | 342 | 2 | Chr03: 15656901 - 15658916 | 3.5e-234 |
| PtWRKY53-3 | Potri.012G031700   | 1116 | 371 | 2 | Chr12: 2820069 - 2822264   | 1.5e-250 |
| PtWRKY54-1 | Potri.016G137900   | 966  | 321 | 2 | Chr16: 14049379 - 14051741 | 1.0e-218 |
| PtWRKY54-2 | Potri.006G109100   | 1002 | 333 | 2 | Chr06: 8522038 - 8524071   | 2.7e-229 |
| PtWRKY55-1 | Potri.019G059300   | 756  | 251 | 2 | Chr19: 9106420 - 9108112   | 3.2e-142 |
| PtWRKY55-2 | Potri.013G090400   | 1059 | 352 | 2 | Chr13: 9549330 - 9551441   | 7.4e-223 |
| PtWRKY57-1 | Potri.010G160100   | 882  | 293 | 4 | Chr10: 16599809 - 16606223 | 6.7e-198 |
| PtWRKY57-2 | Potri.008G094000   | 882  | 293 | 3 | Chr08: 5884501 - 5889490   | 1.3e-200 |
| PtWRKY60   | Potri.018G019800   | 963  | 320 | 4 | Chr18: 1505147 - 1507026   | 2.8e-208 |
| PtWRKY65-1 | Potri.004G060400   | 789  | 262 | 2 | Chr04: 4884455 - 4886727   | 3.6e-177 |
| PtWRKY65-2 | Potri.004G060900   | 789  | 262 | 2 | Chr04: 4967273 - 4969191   | 3.6e-177 |
| PtWRKY65-3 | Potri.011G070100   | 807  | 268 | 2 | Chr11: 6568512 - 6570537   | 2.5e-182 |
| PtWRKY69-1 | Potri.003G111900   | 933  | 310 | 2 | Chr03: 13552524 - 13555165 | 6.9e-208 |
| PtWRKY69-2 | Potri.002G195300   | 738  | 245 | 3 | Chr02: 15629980 - 15631893 | 1.8e-165 |
| PtWRKY69-3 | PtPotri.014G119800 | 789  | 262 | 2 | Chr14: 9270774 - 9272792   | 1.8e-165 |
| PtWRKY69-4 | Potri.001G121300   | 945  | 314 | 2 | Chr01: 9788352 - 9790660   | 8.9e-209 |
| PtWRKY70   | Potri.013G090300   | 975  | 324 | 2 | Chr13: 9541636 - 9543313   | 5.3e-221 |
| PtWRKY71-1 | Potri.011G079300   | 921  | 306 | 2 | Chr11: 7865659 - 7867200   | 2.4e-201 |
| PtWRKY71-2 | Potri.001G352400   | 939  | 312 | 2 | Chr01: 36029746 - 36031662 | 2.7e-211 |

|                       |                  |      |     |   |                                 |          |
|-----------------------|------------------|------|-----|---|---------------------------------|----------|
| PtWRKY71-3            | Potri.002G059100 | 978  | 325 | 2 | Chr02: 3993054 - 3995674        | 1.4e-219 |
| PtWRKY71-4            | Potri.005G203200 | 969  | 322 | 2 | Chr05: 21797854 - 21801101      | 5.9e-220 |
| PtWRKY72-1            | Potri.017G079500 | 1617 | 538 | 3 | Chr17: 9321138 - 9323815        | 0.0e+00  |
| PtWRKY72-2            | Potri.015G064100 | 1887 | 628 | 6 | Chr15: 8835584 - 8840603        | 0.0e+00  |
| PtWRKY74              | Potri.005G055300 | 1062 | 353 | 2 | Chr05: 3917572 - 3920158        | 4.2e-241 |
| PtWRKY75-1            | Potri.T043800    | 561  | 186 | 1 | scaffold_41: 135129 - 137486    | 1.4e-103 |
| PtWRKY75-2            | Potri.001G328000 | 804  | 267 | 2 | Chr01: 33209754 - 33213251      | 6.0e-124 |
| PtWRKY75-3            | Potri.003G169100 | 474  | 157 | 1 | Chr03: 17915557 - 17918119      | 1.4e-103 |
| PtWRKY75-4            | Potri.001G058800 | 483  | 160 | 1 | Chr01: 4503179 - 4509102        | 9.1e-86  |
| <i>Prunus persica</i> |                  |      |     |   |                                 |          |
| PperWRKY1             | ppa004905m.g     | 1461 | 486 | 3 | scaffold_3: 15682525 - 15685261 | 0.0e+00  |
| PperWRKY2-1           | ppb022557m.g     | 2256 | 751 | 4 | scaffold_6: 28587954 - 28591793 | 0.0e+00  |
| PperWRKY2-2           | ppa001924m.g     | 2223 | 740 | 4 | scaffold_6: 2468104 - 2471544   | 0.0e+00  |
| PperWRKY3             | ppa004312m.g     | 1554 | 517 | 3 | scaffold_1: 27443164 - 27446022 | 0.0e+00  |
| PperWRKY4             | ppa003809m.g     | 1644 | 547 | 3 | scaffold_3: 19419766 - 19423127 | 0.0e+00  |
| PperWRKY5             | ppa022287m.g     | 735  | 244 | 3 | scaffold_2: 15597322 - 15600214 | 2.8e-167 |
| PperWRKY6-1           | ppa022758m.g     | 1542 | 513 | 5 | scaffold_4: 13666776 - 13669306 | 0.0e+00  |
| PperWRKY6-2           | ppa002619m.g     | 1956 | 651 | 4 | scaffold_3: 16460557 - 16463047 | 0.0e+00  |
| PperWRKY6-3           | ppa003574m.g     | 1695 | 564 | 6 | scaffold_4: 820970 - 825131     | 0.0e+00  |
| PperWRKY7-1           | ppa008613m.g     | 978  | 325 | 2 | scaffold_6: 21500388 - 21502030 | 2.1e-212 |
| PperWRKY7-2           | ppa007930m.g     | 1056 | 351 | 2 | scaffold_1: 35966149 - 35967624 | 1.1e-234 |
| PperWRKY9             | ppa016401m.g     | 1686 | 561 | 4 | scaffold_1: 43717207 - 43719518 | 0.0e+00  |
| PperWRKY11            | ppa009700m.g     | 846  | 281 | 2 | scaffold_1: 4817218 - 4818580   | 1.2e-185 |
| PperWRKY13            | ppa020629m.g     | 696  | 231 | 2 | scaffold_6: 15369732 - 15373318 | 5.7e-157 |
| PperWRKY14            | ppa004535m.g     | 1515 | 504 | 2 | scaffold_4: 5152653 - 5155480   | 0.0e+00  |
| PperWRKY17            | ppa008846m.g     | 954  | 317 | 3 | scaffold_1: 37472989 - 37474731 | 2.7e-210 |
| PperWRKY18            | ppa008566m.g     | 981  | 326 | 5 | scaffold_1: 34009489 - 34011202 | 8.7e-219 |
| PperWRKY19-1          | ppa021559m.g     | 357  | 119 | 2 | scaffold_16: 32444 - 34188      | 1.2e-74  |
| PperWRKY19-2          | ppa026260m.g     | 228  | 76  | 1 | scaffold_5: 11029791 - 11030494 | 8.5e-44  |
| PperWRKY20            | ppa003305m.g     | 1761 | 586 | 5 | scaffold_4: 14951801 - 14956955 | 0.0e+00  |
| PperWRKY21-1          | ppa021657m.g     | 900  | 299 | 2 | scaffold_8: 19829267 - 19831289 | 1.1e-231 |
| PperWRKY21-2          | ppa007838m.g     | 1065 | 354 | 2 | scaffold_6: 27763305 - 27764742 | 6.8e-243 |
| PperWRKY21-3          | ppa023256m.g     | 1023 | 340 | 3 | scaffold_5: 8848352 - 8851174   | 1.4e-224 |

|              |              |      |     |   |                                 |          |
|--------------|--------------|------|-----|---|---------------------------------|----------|
| PperWRKY22-1 | ppa007745m.g | 1074 | 357 | 2 | scaffold_2: 18665651 - 18667118 | 1.0e-240 |
| PperWRKY22-2 | ppa025013m.g | 852  | 283 | 3 | scaffold_5: 11272595 - 11273677 | 1.9e-190 |
| PperWRKY23-1 | ppa008731m.g | 966  | 321 | 2 | scaffold_10: 526239 - 528128    | 8.3e-218 |
| PperWRKY23-2 | ppa006909m.g | 1173 | 390 | 2 | scaffold_1: 8640398 - 8642407   | 1.4e-255 |
| PperWRKY26   | ppa003333m.g | 1755 | 584 | 4 | scaffold_6: 1828828 - 1831501   | 0.0e+00  |
| PperWRKY27   | ppa025042m.g | 1209 | 402 | 3 | scaffold_2: 25381962 - 25384144 | 5.1e-278 |
| PperWRKY32   | ppa004042m.g | 1602 | 533 | 4 | scaffold_7: 22197495 - 22201494 | 0.0e+00  |
| PperWRKY33-1 | ppa015765m.g | 402  | 134 | 2 | scaffold_5: 12459036 - 12459687 | 1.4e-86  |
| PperWRKY33-2 | ppa004009m.g | 1608 | 535 | 4 | scaffold_6: 24639609 - 24641627 | 0.0e+00  |
| PperWRKY35   | ppa010217m.g | 777  | 258 | 2 | scaffold_8: 21517865 - 21519013 | 1.4e-169 |
| PperWRKY40-1 | ppa010796m.g | 711  | 236 | 2 | scaffold_3: 6662580 - 6663950   | 1.1e-147 |
| PperWRKY40-2 | ppa009939m.g | 816  | 271 | 3 | scaffold_1: 34029320 - 34030841 | 3.6e-177 |
| PperWRKY41   | ppa007986m.g | 1050 | 349 | 2 | scaffold_2: 25613734 - 25614985 | 1.9e-237 |
| PperWRKY43-1 | ppa015755m.g | 666  | 221 | 1 | scaffold_2: 18683476 - 18685191 | 5.2e-149 |
| PperWRKY43-2 | ppa024540m.g | 525  | 174 | 1 | scaffold_2: 21972625 - 21973268 | 1.9e-117 |
| PperWRKY44   | ppa005152m.g | 1428 | 475 | 4 | scaffold_6: 22336216 - 22339034 | 0.0e+00  |
| PperWRKY45   | ppa012414m.g | 513  | 170 | 1 | scaffold_5: 13581887 - 13583455 | 4.0e-113 |
| PperWRKY46   | ppa007708m.g | 1077 | 358 | 2 | scaffold_2: 19059670 - 19062101 | 1.4e-242 |
| PperWRKY47   | ppa018075m.g | 1704 | 567 | 4 | scaffold_10: 162785 - 165574    | 0.0e+00  |
| PperWRKY49   | ppa019550m.g | 900  | 299 | 2 | scaffold_6: 23123896 - 23125761 | 2.6e-201 |
| PperWRKY51   | ppa015480m.g | 591  | 196 | 2 | scaffold_6: 15635236 - 15637392 | 3.9e-132 |
| PperWRKY53   | ppa008573m.g | 981  | 326 | 3 | scaffold_5: 11878403 - 11880061 | 7.3e-220 |
| PperWRKY55   | ppa014826m.g | 1047 | 348 | 4 | scaffold_2: 23638750 - 23643347 | 9.0e-238 |
| PperWRKY57   | ppa008480m.g | 993  | 330 | 3 | scaffold_1: 27581955 - 27585622 | 3.4e-225 |
| PperWRKY61-2 | ppa017919m.g | 1602 | 533 | 2 | scaffold_1: 26674923 - 26676963 | 0.0e+00  |
| PperWRKY61-1 | ppa021195m.g | 1941 | 646 | 3 | scaffold_5: 15492412 - 15495700 | 0.0e+00  |
| PperWRKY65   | ppa009647m.g | 852  | 283 | 2 | scaffold_4: 3206039 - 3207150   | 1.1e-189 |
| PperWRKY69   | ppa025586m.g | 834  | 277 | 3 | scaffold_3: 8609429 - 8613217   | 1.1e-186 |
| PperWRKY70-1 | ppa025912m.g | 1053 | 350 | 2 | scaffold_6: 25157893 - 25159753 | 2.2e-244 |
| PperWRKY70-2 | ppa026704m.g | 861  | 286 | 3 | scaffold_6: 25167296 - 25170022 | 3.2e-197 |
| PperWRKY70-3 | ppa020736m.g | 1008 | 335 | 3 | scaffold_6: 25162460 - 25164336 | 4.8e-222 |
| PperWRKY70-4 | ppa026125m.g | 972  | 323 | 2 | scaffold_2: 23642489 - 23644464 | 4.8e-222 |
| PperWRKY71-1 | ppa026831m.g | 1083 | 360 | 2 | scaffold_3: 13803400 - 13805785 | 3.5e-245 |



|                         |               |      |     |   |                                 |          |
|-------------------------|---------------|------|-----|---|---------------------------------|----------|
| PperWRKY71-2            | ppa024027m.g  | 1014 | 337 | 2 | scaffold_4: 3695838 - 3697364   | 2.2e-229 |
| PperWRKY72              | ppa020780m.g  | 1446 | 481 | 3 | scaffold_3: 19839824 - 19842047 | 0.0e+00  |
| PperWRKY75-1            | ppa016153m.g  | 558  | 185 | 1 | scaffold_1: 22733682 - 22735582 | 1.2e-123 |
| PperWRKY75-2            | ppa016459m.g  | 672  | 223 | 1 | scaffold_3: 21511993 - 21513894 | 2.6e-151 |
| <i>Ricinus communis</i> |               |      |     |   |                                 |          |
| RcWRKY1                 | 29949.t000007 | 1455 | 484 | 3 | 29949: 50158 - 52013            | 0.0e+00  |
| RcWRKY3                 | 30174.t000563 | 1407 | 468 | 3 | 30174: 3380314 - 3384496        | 9.8e-316 |
| RcWRKY5                 | 29709.t000007 | 558  | 185 | 3 | 29709: 41452 - 43070            | 8.4e-122 |
| RcWRKY6                 | 30064.t000028 | 1680 | 559 | 5 | 30064: 203340 - 205783          | 0.0e+00  |
| RcWRKY7-1               | 30170.t000244 | 1134 | 377 | 2 | 30170: 1224146 - 1225662        | 1.0e-250 |
| RcWRKY7-2               | 29644.t000015 | 318  | 105 | 1 | 29644: 79578 - 80028            | 3.9e-67  |
| RcWRKY9                 | 29990.t000001 | 1599 | 532 | 4 | 29990: 4397 - 6433              | 0.0e+00  |
| RcWRKY13                | 28040.t000001 | 311  | 103 | 1 | 28040: 28206 - 31334            | 3.3e-67  |
| RcWRKY17                | 29848.t000020 | 966  | 321 | 2 | 29848: 94812 - 96608            | 2.2e-212 |
| RcWRKY18-1              | 30131.t000001 | 519  | 172 | 1 | 30131: 4672 - 6497              | 6.7e-108 |
| RcWRKY18-2              | 29848.t000100 | 420  | 139 | 2 | 29848: 522197 - 523071          | 3.8e-90  |
| RcWRKY20                | 27613.t000032 | 1689 | 562 | 5 | 27613: 207515 - 213650          | 0.0e+00  |
| RcWRKY21-1              | 29883.t000063 | 1062 | 353 | 2 | 29883: 450119 - 452078          | 1.1e-237 |
| RcWRKY21-2              | 29598.t000004 | 792  | 263 | 3 | 29598: 22752 - 24172            | 2.7e-174 |
| RcWRKY22                | 30174.t000060 | 1044 | 347 | 2 | 30174: 2058419 - 2060079        | 5.5e-236 |
| RcWRKY23                | 30076.t000187 | 954  | 317 | 2 | 30076: 1244284 - 1245583        | 4.1e-212 |
| RcWRKY26                | 29820.t000050 | 1677 | 558 | 4 | 29820: 291661 - 294372          | 0.0e+00  |
| RcWRKY27                | 30169.t000358 | 1380 | 459 | 2 | 30169: 1998907 - 2000467        | 0.0e+00  |
| RcWRKY29                | 30190.t000512 | 1005 | 334 | 2 | 30190: 3016527 - 3017971        | 3.4e-222 |
| RcWRKY30-1              | 28690.t000001 | 927  | 308 | 2 | 28690: 12224 - 13680            | 1.4e-226 |
| RcWRKY30-2              | 30174.t000048 | 1002 | 333 | 2 | 30174: 1952662 - 1954347        | 2.1e-184 |
| RcWRKY31                | 29842.t000052 | 1743 | 580 | 5 | 29842: 273087 - 275527          | 0.0e+00  |
| RcWRKY32-1              | 29687.t000003 | 1512 | 503 | 5 | 29687: 15684 - 21009            | 0.0e+00  |
| RcWRKY32-2              | 29848.t000095 | 1119 | 372 | 2 | 29848: 492201 - 493883          | 1.5e-248 |
| RcWRKY33                | 29717.t000002 | 1728 | 575 | 4 | 29717: 10576 - 13600            | 0.0e+00  |
| RcWRKY34-1              | 29929.t000090 | 1830 | 609 | 4 | 29929: 510214 - 512861          | 0.0e+00  |
| RcWRKY34-2              | 28966.t000003 | 2202 | 733 | 4 | 28966: 23998 - 27612            | 0.0e+00  |
| RcWRKY35-1              | 30076.t000212 | 798  | 265 | 2 | 30076: 1383612 - 1384793        | 9.8e-316 |

|                                   |               |      |     |   |                                |          |
|-----------------------------------|---------------|------|-----|---|--------------------------------|----------|
| RcWRKY35-2                        | 27996.t000002 | 1401 | 466 | 4 | 27996: 7134 - 9912             | 4.2e-177 |
| RcWRKY40                          | 29848.t000101 | 636  | 211 | 3 | 29848: 537211 - 538602         | 1.5e-134 |
| RcWRKY41                          | 30169.t000310 | 1113 | 370 | 2 | 30169: 1742567 - 1744656       | 6.6e-251 |
| RcWRKY42                          | 30010.t000025 | 1959 | 652 | 4 | 30010: 384306 - 386731         | 0.0e+00  |
| RcWRKY43-1                        | 30174.t000066 | 579  | 192 | 1 | 30174: 2076040 - 2077754       | 3.8e-129 |
| RcWRKY43-2                        | 30190.t000514 | 558  | 185 | 1 | 30190: 3026476 - 3027219       | 7.8e-124 |
| RcWRKY44                          | 29805.t000035 | 1425 | 474 | 4 | 29805: 189773 - 191900         | 0.0e+00  |
| RcWRKY45                          | 30147.t000745 | 495  | 164 | 1 | 30147: 2203761 - 2204393       | 1.2e-106 |
| RcWRKY47                          | 30076.t000112 | 1497 | 498 | 5 | 30076: 678694 - 681282         | 0.0e+00  |
| RcWRKY48                          | 29889.t000087 | 1056 | 351 | 2 | 29889: 412384 - 414133         | 1.4e-232 |
| RcWRKY49                          | 29767.t000010 | 891  | 296 | 1 | 29767: 163654 - 166469         | 2.3e-199 |
| RcWRKY50                          | 29739.t000022 | 480  | 159 | 2 | 29739: 136858 - 137722         | 3.3e-106 |
| RcWRKY51-1                        | 29771.t000001 | 648  | 215 | 2 | 29771: 4111 - 8719             | 2.8e-147 |
| RcWRKY51-2                        | 28644.t000022 | 507  | 168 | 2 | 28644: 112321 - 114401         | 7.6e-113 |
| RcWRKY53                          | 30190.t000050 | 1017 | 338 | 2 | 30190: 3507055 - 3508463       | 1.8e-229 |
| RcWRKY54                          | 29729.t000102 | 945  | 314 | 2 | 29729: 563671 - 564936         | 6.9e-215 |
| RcWRKY55-2                        | 29729.t000063 | 957  | 318 | 2 | 29729: 342169 - 344149         | 5.8e-217 |
| RcWRKY55-1                        | 29729.t000103 | 996  | 331 | 2 | 29729: 568893 - 570667         | 7.6e-113 |
| RcWRKY57                          | 30174.t000532 | 942  | 313 | 2 | 30174: 3221434 - 3224608       | 2.0e-216 |
| RcWRKY59                          | 28455.t000009 | 1104 | 367 | 3 | 28455: 134590 - 136512         | 2.5e-247 |
| RcWRKY60                          | 43951.t000001 | 586  | 195 | 2 | 43951: 31 - 916                | 2.2e-124 |
| RcWRKY61                          | 29736.t000019 | 1689 | 562 | 5 | 29736: 182805 - 186919         | 0.0e+00  |
| RcWRKY65                          | 30026.t000025 | 804  | 267 | 2 | 30026: 178343 - 179952         | 1.2e-180 |
| RcWRKY70                          | 29915.t000015 | 993  | 330 | 2 | 29915: 141304 - 143043         | 6.4e-221 |
| RcWRKY71                          | 29693.t000098 | 933  | 330 | 2 | 29693: 676301 - 677606         | 2.1e-211 |
| RcWRKY72-1                        | 29822.t000159 | 1683 | 560 | 4 | 29822: 915514 - 919280         | 0.0e+00  |
| RcWRKY72-2                        | 30147.t000358 | 1956 | 651 | 5 | 30147: 4428301 - 4432024       | 0.0e+00  |
| RcWRKY75-1                        | 29929.t000127 | 612  | 203 | 1 | 29929: 718638 - 720485         | 1.9e-131 |
| RcWRKY75-2                        | 30190.t000144 | 585  | 194 | 1 | 30190: 612076 - 613585         | 2.3e-128 |
| <i>Selaginella moellendorffii</i> |               |      |     |   |                                |          |
| SmWRKY2                           | 56793         | 861  | 287 | 4 | scaffold_39: 1056465 - 1057945 | 1.5e-195 |
| SmWRKY6                           | 29146         | 318  | 106 | 0 | scaffold_1: 5239472 - 5239789  | 1.6e-65  |
| SmWRKY7-1                         | 73225         | 153  | 51  | 1 | scaffold_14: 996802 - 997039   | 1.7e-29  |

|                        |             |      |     |    |                                 |          |
|------------------------|-------------|------|-----|----|---------------------------------|----------|
| SmWRKY7-2              | 147026      | 876  | 291 | 3  | scaffold_14: 1116310 - 1117972  | 6.0e-195 |
| SmWRKY8                | 69423       | 261  | 87  | 1  | scaffold_8: 478098 - 478423     | 1.1e-61  |
| SmWRKY9                | 81371       | 186  | 62  | 1  | scaffold_4: 2643379 - 2643634   | 3.3e-43  |
| SmWRKY15               | 108669      | 186  | 62  | 1  | scaffold_37: 849679 - 849932    | 4.4e-38  |
| SmWRKY21               | 73221       | 177  | 59  | 1  | scaffold_14: 1266414 - 1266697  | 1.5e-36  |
| SmWRKY26               | 66769       | 813  | 271 | 4  | scaffold_11: 2777016 - 2778560  | 2.3e-181 |
| SmWRK28                | 69431       | 261  | 87  | 1  | scaffold_0: 4893341 - 4893667   | 1.1e-61  |
| SmWRK33                | 24407       | 777  | 259 | 2  | scaffold_4: 1503216 - 1504146   | 7.6e-175 |
| SmWRKY34               | 125080      | 603  | 200 | 2  | scaffold_77: 184904 - 185758    | 8.7e-135 |
| SmWRK35                | 77979       | 285  | 95  | 1  | scaffold_2: 1361130 - 1361619   | 4.6e-63  |
| SmWRKY39               | 73220       | 177  | 59  | 1  | scaffold_4: 206074 - 206417     | 5.1e-37  |
| SmWRK42                | 92733       | 378  | 126 | 1  | scaffold_13: 1393034 - 1393523  | 1.4e-82  |
| SmWRKY48               | 69405       | 246  | 82  | 1  | scaffold_4: 2918228 - 2918710   | 4.2e-57  |
| SmWRKY54               | 29692       | 201  | 67  | 1  | scaffold_1: 207818 - 208376     | 4.3e-45  |
| SmWRKY55               | 29703       | 192  | 64  | 1  | scaffold_5: 3733269 - 3733528   | 8.8e-47  |
| SmWRKY57               | 29247       | 240  | 80  | 1  | scaffold_19: 680055 - 680520    | 3.0e-65  |
| <i>Setaria italica</i> |             |      |     |    |                                 |          |
| SiWRKY2                | Si038537m.g | 1266 | 421 | 1  | scaffold_9: 35337925 - 35339264 | 7.8e-285 |
| SiWRKY3                | Si036692m.g | 951  | 316 | 3  | scaffold_9: 5125810 - 5129451   | 8.7e-205 |
| SiWRKY4                | Si034188m.g | 2628 | 875 | 10 | scaffold_9: 5055630 - 5061547   | 0.0e+00  |
| SiWRKY5                | Si022468m.g | 1077 | 358 | 2  | scaffold_3: 3470860 - 3472976   | 1.3e-229 |
| SiWRKY6                | Si040171m.g | 1209 | 402 | 2  | scaffold_9: 3108737 - 3110314   | 5.6e-264 |
| SiWRKY7                | Si023194m.g | 663  | 220 | 2  | scaffold_3: 12073118 - 12074773 | 3.9e-140 |
| SiWRKY8                | Si022568m.g | 1032 | 343 | 1  | scaffold_3: 9086074 - 9088318   | 1.1e-231 |
| SiWRKY9                | Si000824m.g | 1725 | 574 | 5  | scaffold_5: 3128175 - 3133163   | 0.0e+00  |
| SiWRKY10               | Si002621m.g | 774  | 257 | 2  | scaffold_5: 11385866 - 11387183 | 2.8e-173 |
| SiWRKY11               | Si002019m.g | 1068 | 355 | 2  | scaffold_5: 29626945 - 29629320 | 2.9e-244 |
| SiWRKY12               | Si001863m.g | 1137 | 378 | 2  | scaffold_5: 29517728 - 29519669 | 2.6e-247 |
| SiWRKY13               | Si002364m.g | 918  | 305 | 2  | scaffold_5: 36906836 - 36908901 | 7.8e-199 |
| SiWRKY14               | Si002365m.g | 918  | 305 | 1  | scaffold_5: 35946493 - 35948069 | 1.7e-201 |
| SiWRKY15               | Si002203m.g | 987  | 328 | 2  | scaffold_5: 31163423 - 31164962 | 9.7e-219 |
| SiWRKY16-1             | Si001816m.g | 1158 | 385 | 2  | scaffold_5: 32436584 - 32439385 | 5.6e-261 |
| SiWRKY16-2             | Si024841m.g | 531  | 177 | 1  | scaffold_3: 3216727 - 3217377   | 1.8e-115 |

|            |             |      |     |   |                                 |          |
|------------|-------------|------|-----|---|---------------------------------|----------|
| SiWRKY17   | Si005025m.g | 1143 | 380 | 2 | scaffold_5: 47112340 - 47113983 | 8.0e-252 |
| SiWRKY18   | Si005138m.g | 774  | 257 | 2 | scaffold_5: 40034269 - 40038719 | 1.8e-177 |
| SiWRKY19   | Si022843m.g | 882  | 293 | 2 | scaffold_3: 9758402 - 9760416   | 6.7e-199 |
| SiWRKY20   | Si003782m.g | 999  | 332 | 2 | scaffold_5: 40040883 - 40043080 | 3.2e-227 |
| SiWRKY21   | Si002401m.g | 897  | 298 | 1 | scaffold_5: 40062376 - 40063545 | 1.7e-204 |
| SiWRKY22   | Si004791m.g | 693  | 230 | 2 | scaffold_5: 40023634 - 40027402 | 3.4e-159 |
| SiWRKY23-1 | Si002751m.g | 714  | 237 | 1 | scaffold_5: 36074399 - 36077406 | 2.6e-160 |
| SiWRKY23-2 | Si025086m.g | 705  | 234 | 1 | scaffold_3: 12588817 - 12589663 | 1.3e-155 |
| SiWRKY24-1 | Si000906m.g | 1659 | 552 | 4 | scaffold_5: 40361245 - 40363952 | 0.0e+00  |
| SiWRKY24-2 | Si026466m.g | 1188 | 395 | 3 | scaffold_8: 10797932 - 10800694 | 6.9e-272 |
| SiWRKY25   | Si014163m.g | 897  | 298 | 0 | scaffold_6: 1207862 - 1209078   | 2.4e-190 |
| SiWRKY26   | Si004464m.g | 657  | 218 | 2 | scaffold_5: 35093336 - 35094332 | 1.4e-147 |
| SiWRKY27   | Si002295m.g | 954  | 317 | 1 | scaffold_5: 31804633 - 31805848 | 3.1e-210 |
| SiWRKY28   | Si006914m.g | 969  | 322 | 2 | scaffold_4: 31570795 - 31572497 | 3.4e-210 |
| SiWRKY29   | Si030377m.g | 1038 | 345 | 1 | scaffold_2: 189686 - 191781     | 9.6e-230 |
| SiWRKY30   | Si013374m.g | 2010 | 669 | 6 | scaffold_6: 31988939 - 31992934 | 0.0e+00  |
| SiWRKY31-1 | Si008820m.g | 1032 | 343 | 1 | scaffold_4: 25418195 - 25419340 | 1.4e-230 |
| SiWRKY31-2 | Si008215m.g | 966  | 322 | 2 | scaffold_4: 23966320 - 23967446 | 6.3e-221 |
| SiWRKY32   | Si016791m.g | 1695 | 564 | 4 | scaffold_1: 39238452 - 39240738 | 0.0e+00  |
| SiWRKY34   | Si018283m.g | 675  | 224 | 3 | scaffold_1: 33079967 - 33084064 | 4.3e-157 |
| SiWRKY35   | Si012785m.g | 2037 | 678 | 4 | scaffold_7: 22557955 - 22561463 | 0.0e+00  |
| SiWRKY36   | Si030985m.g | 711  | 236 | 3 | scaffold_2: 22792365 - 22795907 | 1.0e-162 |
| SiWRKY37   | Si011735m.g | 1419 | 472 | 2 | scaffold_7: 28832235 - 28835104 | 0.0e+00  |
| SiWRKY39   | Si017529m.g | 1137 | 378 | 2 | scaffold_1: 747341 - 748929     | 3.1e-252 |
| SiWRKY40   | Si019098m.g | 993  | 330 | 2 | scaffold_1: 3503350 - 3504664   | 1.0e-230 |
| SiWRKY42   | Si017889m.g | 924  | 307 | 2 | scaffold_1: 21363712 - 21365226 | 4.8e-201 |
| SiWRKY43   | Si024078m.g | 1734 | 577 | 5 | scaffold_3: 10070045 - 10072439 | 0.0e+00  |
| SiWRKY45   | Si022702m.g | 951  | 316 | 2 | scaffold_3: 27173841 - 27175564 | 4.8e-208 |
| SiWRKY46-1 | Si011007m.g | 672  | 223 | 2 | scaffold_7: 34178729 - 34181807 | 4.8e-150 |
| SiWRKY46-2 | Si026831m.g | 672  | 223 | 2 | scaffold_8: 746745 - 749572     | 9.5e-150 |
| SiWRKY47   | Si030395m.g | 1032 | 343 | 2 | scaffold_2: 48387967 - 48389788 | 7.3e-225 |
| SiWRKY49   | Si022220m.g | 1215 | 404 | 2 | scaffold_3: 10306902 - 10309504 | 1.5e-274 |
| SiWRKY51   | Si012025m.g | 1098 | 365 | 2 | scaffold_7: 13130951 - 13132232 | 2.9e-243 |

|            |             |      |      |   |                                 |          |
|------------|-------------|------|------|---|---------------------------------|----------|
| SiWRKY52   | Si010706m.g | 900  | 299  | 1 | scaffold_7: 34171483 - 34172498 | 7.3e-203 |
| SiWRKY53   | Si021956m.g | 1410 | 469  | 1 | scaffold_3: 26202837 - 26205056 | 0.0e+00  |
| SiWRKY54-1 | Si027574m.g | 738  | 246  | 2 | scaffold_8: 33523376 - 33524318 | 5.9e-167 |
| SiWRKY54-2 | Si024816m.g | 624  | 208  | 2 | scaffold_3: 15583218 - 15584065 | 3.8e-139 |
| SiWRKY55   | Si039519m.g | 654  | 217  | 2 | scaffold_9: 47763258 - 47764313 | 4.6e-145 |
| SiWRKY57   | Si014939m.g | 534  | 177  | 1 | scaffold_6: 33364162 - 33364874 | 4.1e-122 |
| SiWRKY59-1 | Si028710m.g | 3873 | 1290 | 5 | scaffold_2: 26415481 - 26421105 | 0.0e+00  |
| SiWRKY59-2 | Si013326m.g | 2199 | 732  | 5 | scaffold_6: 2354633 - 2359056   | 0.0e+00  |
| SiWRKY60-1 | Si038955m.g | 282  | 93   | 1 | scaffold_9: 9759533 - 9761173   | 5.9e-60  |
| SiWRKY60-2 | Si038001m.g | 399  | 132  | 2 | scaffold_9: 9767027 - 9768526   | 2.9e-83  |
| SiWRKY62   | Si030794m.g | 813  | 270  | 2 | scaffold_2: 30748506 - 30749602 | 9.6e-177 |
| SiWRKY64-1 | Si010764m.g | 864  | 287  | 2 | scaffold_7: 34194819 - 34196066 | 3.7e-193 |
| SiWRKY64-2 | Si028202m.g | 876  | 291  | 2 | scaffold_8: 12982860 - 12983901 | 2.1e-202 |
| SiWRKY65   | Si010813m.g | 825  | 274  | 2 | scaffold_7: 34202591 - 34204306 | 2.7e-185 |
| SiWRKY66   | Si017095m.g | 1425 | 474  | 2 | scaffold_1: 35418955 - 35422712 | 0.0e+00  |
| SiWRKY67   | Si023279m.g | 612  | 203  | 2 | scaffold_3: 7209438 - 7210943   | 4.8e-132 |
| SiWRKY68   | Si010545m.g | 1014 | 337  | 3 | scaffold_7: 29191315 - 29193248 | 1.6e-215 |
| SiWRKY69   | Si015433m.g | 1035 | 344  | 1 | scaffold_6: 23660441 - 23661481 | 1.3e-230 |
| SiWRKY70   | Si021634m.g | 1689 | 562  | 3 | scaffold_3: 16100904 - 16103618 | 0.0e+00  |
| SiWRKY71   | Si017443m.g | 1188 | 395  | 2 | scaffold_1: 5877131 - 5879314   | 3.0e-261 |
| SiWRKY72   | Si026859m.g | 624  | 207  | 1 | scaffold_8: 23524892 - 23527940 | 3.0e-138 |
| SiWRKY73   | Si006217m.g | 1602 | 533  | 2 | scaffold_4: 2226437 - 2230067   | 0.0e+00  |
| SiWRKY74-1 | Si030528m.g | 975  | 324  | 1 | scaffold_2: 27231842 - 27233604 | 2.8e-216 |
| SiWRKY74-2 | Si030531m.g | 972  | 323  | 2 | scaffold_2: 27207918 - 27209792 | 1.1e-213 |
| SiWRKY76   | Si030429m.g | 1014 | 337  | 2 | scaffold_2: 30729585 - 30731008 | 1.1e-220 |
| SiWRKY77   | Si002862m.g | 657  | 218  | 1 | scaffold_5: 31907150 - 31908059 | 1.3e-144 |
| SiWRKY78   | Si029245m.g | 1842 | 613  | 5 | scaffold_2: 44372289 - 44377436 | 0.0e+00  |
| SiWRKY79   | Si036565m.g | 993  | 330  | 2 | scaffold_9: 47109496 - 47110923 | 2.4e-214 |
| SiWRKY80   | Si029342m.g | 1722 | 573  | 5 | scaffold_2: 35162754 - 35166321 | 0.0e+00  |
| SiWRKY81-1 | Si026670m.g | 930  | 309  | 5 | scaffold_8: 762199 - 763393     | 4.1e-210 |
| SiWRKY81-2 | Si027328m.g | 843  | 280  | 2 | scaffold_8: 12912885 - 12914076 | 1.4e-192 |
| SiWRKY81-3 | Si027769m.g | 873  | 290  | 2 | scaffold_8: 12966027 - 12967302 | 2.7e-200 |
| SiWRKY81-4 | Si027998m.g | 873  | 290  | 2 | scaffold_8: 12959461 - 12960684 | 5.3e-200 |

|                             |                  |      |     |   |                                 |          |
|-----------------------------|------------------|------|-----|---|---------------------------------|----------|
| SiWRKY81-5                  | Si027946m.g      | 912  | 303 | 2 | scaffold_8: 12904286 - 12905548 | 5.4e-210 |
| SiWRKY81-6                  | Si028270m.g      | 876  | 291 | 3 | scaffold_8: 12997035 - 12998335 | 2.9e-199 |
| SiWRKY82-1                  | Si013488m.g      | 1722 | 573 | 3 | scaffold_6: 12823975 - 12830187 | 0.0e+00  |
| SiWRKY82-2                  | Si027876m.g      | 753  | 250 | 2 | scaffold_8: 725949 - 727164     | 2.2e-168 |
| SiWRKY83-1                  | Si022461m.g      | 1077 | 358 | 3 | scaffold_3: 47920504 - 47923359 | 6.0e-238 |
| SiWRKY83-2                  | Si036408m.g      | 1050 | 349 | 3 | scaffold_9: 10990005 - 10993009 | 8.8e-234 |
| SiWRKY85                    | Si021859m.g      | 1485 | 494 | 3 | scaffold_3: 45536398 - 45541486 | 0.0e+00  |
| SiWRKY86                    | Si002121m.g      | 1017 | 338 | 2 | scaffold_5: 40052992 - 40055657 | 1.4e-224 |
| SiWRKY87                    | Si036039m.g      | 1185 | 394 | 3 | scaffold_9: 5904751 - 5907896   | 1.8e-262 |
| SiWRKY88                    | Si038727m.g      | 1122 | 373 | 2 | scaffold_9: 322262 - 326601     | 7.1e-254 |
| SiWRKY90-1                  | Si025181m.g      | 810  | 270 | 3 | scaffold_3: 5270636 - 5272093   | 1.3e-183 |
| SiWRKY90-2                  | Si031470m.g      | 414  | 137 | 5 | scaffold_2: 6029825 - 6031654   | 1.6e-89  |
| SiWRKY91                    | Si022933m.g      | 828  | 275 | 2 | scaffold_3: 15637590 - 15640378 | 1.2e-183 |
| SiWRKY92                    | Si022676m.g      | 966  | 321 | 2 | scaffold_3: 9059875 - 9061197   | 1.1e-216 |
| SiWRKY93                    | Si008812m.g      | 1080 | 359 | 2 | scaffold_4: 5139966 - 5142417   | 2.4e-244 |
| SiWRKY95                    | Si025307m.g      | 1113 | 370 | 2 | scaffold_3: 27182439 - 27185445 | 1.7e-250 |
| SiWRKY96                    | Si035317m.g      | 1506 | 501 | 3 | scaffold_9: 41983508 - 41991013 | 0.0e+00  |
| SiWRKY97                    | Si001109m.g      | 1527 | 508 | 3 | scaffold_5: 11382193 - 11384494 | 0.0e+00  |
| SiWRKY100                   | Si010832m.g      | 816  | 271 | 2 | scaffold_7: 34186596 - 34187853 | 7.4e-185 |
| SiWRKY101                   | Si012735m.g      | 771  | 256 | 2 | scaffold_7: 21739485 - 21741091 | 1.2e-179 |
| SiWRKY102                   | Si003805m.g      | 627  | 209 | 1 | scaffold_5: 11112146 - 11112866 | 3.4e-135 |
| SiWRKY103                   | Si002957m.g      | 618  | 205 | 1 | scaffold_5: 41194496 - 41195255 | 1.1e-136 |
| SiWRKY104                   | Si027360m.g      | 738  | 245 | 2 | scaffold_8: 736074 - 737116     | 2.3e-167 |
| SiWRKY106                   | Si003876m.g      | 516  | 171 | 0 | scaffold_5: 41188553 - 41189068 | 3.8e-112 |
| <i>Solanum lycopersicum</i> |                  |      |     |   |                                 |          |
| SIWRKY1-1                   | Solyc07g047960.2 | 1242 | 413 | 4 | chr07: 56499981 - 56504055      | 3.3e-272 |
| SIWRKY1-2                   | Solyc12g006170.1 | 1248 | 415 | 3 | chr12: 712968 - 715497          | 2.2e-277 |
| SIWRKY2-1                   | Solyc07g066220.2 | 2220 | 739 | 5 | chr07: 64918419 - 64923896      | 0.0e+00  |
| SIWRKY2-2                   | Solyc10g005680.1 | 2112 | 703 | 4 | chr10: 551292 - 554630          | 0.0e+00  |
| SIWRKY3                     | Solyc02g088340.2 | 1383 | 460 | 3 | chr02: 45045827 - 45048579      | 2.0e-315 |
| SIWRKY4-1                   | Solyc03g104810.2 | 1461 | 486 | 3 | chr03: 54885728 - 54891292      | 0.0e+00  |
| SIWRKY4-2                   | Solyc05g012770.2 | 1527 | 508 | 3 | chr05: 5928753 - 5934454        | 0.0e+00  |
| SIWRKY5                     | Solyc01g089960.2 | 711  | 236 | 3 | chr01: 75418839 - 75424413      | 5.2e-159 |

|            |                  |      |     |   |                            |          |
|------------|------------------|------|-----|---|----------------------------|----------|
| SIWRKY6-1  | Solyc02g080890.2 | 1653 | 550 | 5 | chr02: 39569094 - 39571649 | 0.0e+00  |
| SIWRKY6-2  | Solyc02g032950.2 | 1497 | 498 | 4 | chr02: 20198127 - 20200157 | 0.0e+00  |
| SIWRKY7    | Solyc04g078550.2 | 1056 | 351 | 3 | chr04: 60852591 - 60854416 | 1.1e-230 |
| SIWRKY9    | Solyc01g104550.2 | 1428 | 475 | 4 | chr01: 84779786 - 84782183 | 1.3e-312 |
| SIWRKY11   | Solyc12g096350.1 | 1017 | 338 | 5 | chr12: 63654463 - 63655829 | 2.8e-223 |
| SIWRKY13   | Solyc04g051540.2 | 705  | 234 | 2 | chr04: 49935987 - 49940182 | 1.2e-158 |
| SIWRKY14   | Solyc03g082810.1 | 660  | 219 | 0 | chr03: 46218868 - 46219527 | 1.8e-148 |
| SIWRKY15   | Solyc02g093050.2 | 981  | 326 | 4 | chr02: 48575427 - 48577339 | 9.8e-212 |
| SIWRKY17   | Solyc08g006320.2 | 987  | 328 | 2 | chr08: 985013 - 986480     | 2.8e-217 |
| SIWRKY18   | Solyc08g067360.2 | 777  | 258 | 3 | chr08: 53615717 - 53617791 | 9.6e-170 |
| SIWRKY20-1 | Solyc03g082750.1 | 537  | 178 | 0 | chr03: 46183274 - 46183810 | 0.0e+00  |
| SIWRKY20-2 | Solyc12g014610.1 | 1836 | 611 | 5 | chr12: 5610112 - 5616122   | 0.0e+00  |
| SIWRKY20-3 | Solyc07g065260.2 | 1791 | 596 | 5 | chr07: 64315902 - 64321013 | 0.0e+00  |
| SIWRKY21-1 | Solyc09g066010.2 | 996  | 331 | 2 | chr09: 59882612 - 59884663 | 9.9e-222 |
| SIWRKY21-2 | Solyc06g008610.2 | 1047 | 348 | 2 | chr06: 2512503 - 2514892   | 1.2e-234 |
| SIWRKY22-1 | Solyc05g045800.1 | 762  | 253 | 2 | chr05: 56734007 - 56735123 | 9.9e-222 |
| SIWRKY22-2 | Solyc01g095100.2 | 1068 | 355 | 2 | chr01: 78259686 - 78261279 | 1.6e-242 |
| SIWRKY22-3 | Solyc10g011910.2 | 936  | 311 | 2 | chr10: 4187405 - 4189346   | 5.6e-212 |
| SIWRKY23   | Solyc01g079260.2 | 963  | 320 | 2 | chr01: 70866242 - 70868698 | 3.6e-219 |
| SIWRKY26   | Solyc06g066370.2 | 1608 | 535 | 4 | chr06: 38062111 - 38065102 | 0.0e+00  |
| SIWRKY27-1 | Solyc03g007640.1 | 1080 | 359 | 2 | chr03: 2179022 - 2180281   | 4.7e-235 |
| SIWRKY27-2 | Solyc04g050210.1 | 1101 | 366 | 2 | chr04: 45295989 - 45297316 | 8.8e-249 |
| SIWRKY27-3 | Solyc05g050060.1 | 969  | 322 | 2 | chr05: 59189414 - 59190607 | 1.2e-216 |
| SIWRKY27-3 | Solyc05g050050.1 | 969  | 322 | 2 | chr05: 59132157 - 59133345 | 1.2e-216 |
| SIWRKY27-4 | Solyc05g045880.1 | 966  | 321 | 2 | chr05: 56755323 - 56756511 | 3.7e-217 |
| SIWRKY27-5 | Solyc05g050040.1 | 837  | 278 | 2 | chr05: 59125683 - 59126804 | 9.2e-187 |
| SIWRKY27-6 | Solyc05g045710.1 | 717  | 238 | 2 | chr05: 56704002 - 56705190 | 2.1e-160 |
| SIWRKY28-1 | Solyc07g056280.2 | 969  | 322 | 2 | chr07: 61460392 - 61463054 | 2.8e-221 |
| SIWRKY28-2 | Solyc12g011200.1 | 1008 | 335 | 2 | chr12: 4045306 - 4047487   | 6.7e-228 |
| SIWRKY29   | Solyc08g081610.2 | 912  | 303 | 2 | chr08: 61773941 - 61776031 | 2.7e-204 |
| SIWRKY30   | Solyc03g007380.1 | 1062 | 353 | 2 | chr03: 1929376 - 1930601   | 2.8e-240 |
| SIWRKY31   | Solyc07g051840.2 | 1896 | 631 | 4 | chr07: 57685533 - 57688827 | 0.0e+00  |
| SIWRKY32   | Solyc07g005650.2 | 1542 | 513 | 4 | chr07: 518591 - 524775     | 0.0e+00  |

|            |                  |      |     |   |                            |          |
|------------|------------------|------|-----|---|----------------------------|----------|
| SIWRKY34-1 | Solyc05g055750.2 | 1380 | 459 | 4 | chr05: 64410352 - 64413767 | 7.8e-315 |
| SIWRKY34-2 | Solyc04g056360.2 | 1206 | 401 | 2 | chr04: 53281612 - 53283583 | 1.1e-273 |
| SIWRKY35-1 | Solyc02g021680.2 | 1146 | 381 | 2 | chr02: 14206227 - 14209227 | 7.6e-260 |
| SIWRKY35-2 | Solyc01g079360.2 | 723  | 240 | 2 | chr01: 70960474 - 70962139 | 2.9e-159 |
| SIWRKY40-1 | Solyc03g116890.2 | 1053 | 350 | 4 | chr03: 60192911 - 60195340 | 3.0e-224 |
| SIWRKY40-2 | Solyc06g068460.2 | 1083 | 360 | 3 | chr06: 38823797 - 38825771 | 1.6e-234 |
| SIWRKY41-1 | Solyc10g009550.2 | 873  | 290 | 2 | chr10: 3672838 - 3674913   | 1.6e-196 |
| SIWRKY41-2 | Solyc05g050330.2 | 735  | 244 | 2 | chr05: 59596882 - 59598610 | 1.8e-162 |
| SIWRKY41-3 | Solyc05g050340.2 | 984  | 327 | 2 | chr05: 59599095 - 59601281 | 6.5e-223 |
| SIWRKY41-4 | Solyc05g050300.1 | 588  | 195 | 1 | chr05: 59581810 - 59582488 | 3.5e-131 |
| SIWRKY43   | Solyc08g081630.1 | 696  | 231 | 1 | chr08: 61787281 - 61789385 | 6.2e-158 |
| SIWRKY44   | Solyc10g084380.1 | 1269 | 422 | 4 | chr10: 63276460 - 63279065 | 8.9e-284 |
| SIWRKY47   | Solyc05g007110.2 | 1179 | 392 | 4 | chr05: 1679764 - 1683310   | 3.3e-260 |
| SIWRKY48   | Solyc01g058540.2 | 975  | 324 | 2 | chr01: 59717621 - 59719154 | 2.1e-215 |
| SIWRKY49   | Solyc09g010960.2 | 873  | 290 | 2 | chr09: 4315614 - 4317328   | 4.1e-198 |
| SIWRKY50   | Solyc08g062490.2 | 546  | 181 | 2 | chr08: 48364804 - 48366524 | 1.5e-120 |
| SIWRKY51   | Solyc04g051690.2 | 525  | 174 | 2 | chr04: 50163412 - 50166584 | 4.6e-116 |
| SIWRKY53-1 | Solyc08g082110.2 | 1020 | 339 | 2 | chr08: 62164391 - 62166398 | 2.0e-232 |
| SIWRKY53-2 | Solyc01g095630.2 | 1011 | 336 | 2 | chr01: 78600553 - 78602865 | 8.7e-222 |
| SIWRKY53-3 | Solyc08g008280.2 | 1083 | 360 | 2 | chr08: 2704613 - 2706561   | 5.9e-249 |
| SIWRKY54   | Solyc03g095770.2 | 822  | 273 | 2 | chr03: 50421318 - 50423492 | 9.2e-186 |
| SIWRKY55   | Solyc06g048870.1 | 732  | 243 | 3 | chr06: 28334966 - 28338066 | 5.7e-168 |
| SIWRKY57   | Solyc05g012500.2 | 984  | 327 | 2 | chr05: 5742002 - 5745384   | 8.8e-221 |
| SIWRKY59-1 | Solyc12g056750.1 | 567  | 188 | 2 | chr12: 48196449 - 48199052 | 1.3e-123 |
| SIWRKY59-2 | Solyc04g072070.2 | 687  | 228 | 2 | chr04: 56722272 - 56725055 | 8.5e-150 |
| SIWRKY60-1 | Solyc08g067340.2 | 762  | 253 | 3 | chr08: 53602606 - 53604908 | 6.1e-166 |
| SIWRKY60-2 | Solyc12g042590.1 | 651  | 216 | 3 | chr12: 43390294 - 43391728 | 2.4e-142 |
| SIWRKY61   | Solyc03g113120.2 | 1575 | 524 | 4 | chr03: 57442051 - 57446231 | 0.0e+00  |
| SIWRKY65-1 | Solyc07g055280.2 | 828  | 275 | 2 | chr07: 60692504 - 60696127 | 1.6e-176 |
| SIWRKY65-2 | Solyc10g007970.1 | 768  | 255 | 2 | chr10: 2131640 - 2134481   | 1.6e-176 |
| SIWRKY68   | Solyc05g053380.2 | 888  | 295 | 2 | chr05: 62631053 - 62633674 | 9.9e-202 |
| SIWRKY69   | Solyc02g072190.2 | 927  | 308 | 2 | chr02: 36084177 - 36085943 | 4.6e-205 |
| SIWRKY70   | Solyc09g015770.2 | 876  | 291 | 2 | chr09: 10987958 - 10989890 | 9.0e-195 |



|                          |                      |      |     |   |                            |          |
|--------------------------|----------------------|------|-----|---|----------------------------|----------|
| SIWRKY71                 | Solyc02g071130.2     | 954  | 317 | 2 | chr02: 35189131 - 35190735 | 9.7e-215 |
| SIWRKY72-1               | Solyc06g070990.2     | 1950 | 649 | 5 | chr06: 39985716 - 39990128 | 0.0e+00  |
| SIWRKY72-2               | Solyc02g067430.2     | 1323 | 440 | 2 | chr02: 32190832 - 32193017 | 2.7e-288 |
| SIWRKY75-1               | Solyc05g015850.2     | 519  | 172 | 1 | chr05: 12420457 - 12423158 | 9.2e-113 |
| SIWRKY75-2               | Solyc02g094270.1     | 396  | 131 | 1 | chr02: 49426008 - 49428482 | 1.4e-87  |
| <i>Solanum tuberosum</i> |                      |      |     |   |                            |          |
| StWRKY1-1                | PGSC0003DMG400006155 | 1269 | 422 | 3 | chr07: 41918631 - 41923738 | 4.0e-279 |
| StWRKY1-2                | PGSC0003DMG402028822 | 1650 | 549 | 3 | chr12: 6096237 - 6102945   | 0.0e+00  |
| StWRKY2                  | PGSC0003DMG400011271 | 2094 | 697 | 4 | chr10: 681772 - 685968     | 0.0e+00  |
| StWRKY3                  | PGSC0003DMG401005575 | 1551 | 516 | 3 | chr03: 31865504 - 31871538 | 0.0e+00  |
| StWRKY4-1                | PGSC0003DMG400001434 | 1356 | 451 | 3 | chr02: 67174898 - 67177768 | 1.2e-311 |
| StWRKY4-2                | PGSC0003DMG400023360 | 1374 | 457 | 2 | chr05: 60392669 - 60398080 | 9.4e-315 |
| StWRKY5                  | PGSC0003DMG400031175 | 756  | 251 | 3 | chr01: 75161638 - 75167283 | 2.8e-167 |
| StWRKY6                  | PGSC0003DMG400015015 | 1674 | 557 | 4 | chr07: 43494519 - 43497505 | 0.0e+00  |
| StWRKY7-1                | PGSC0003DMG400024961 | 975  | 324 | 2 | chr02: 64674891 - 64676420 | 8.3e-211 |
| StWRKY7-2                | PGSC0003DMG400007947 | 1065 | 354 | 2 | chr04: 59952962 - 59954622 | 1.5e-233 |
| StWRKY8                  | PGSC0003DMG400007788 | 1005 | 334 | 2 | chr12: 1160881 - 1163790   | 1.8e-227 |
| StWRKY9                  | PGSC0003DMG400029779 | 1242 | 413 | 3 | chr01: 87440155 - 87442186 | 4.1e-276 |
| StWRKY11                 | PGSC0003DMG400029371 | 939  | 312 | 2 | chr12: 64688961 - 64690398 | 2.0e-206 |
| StWRKY12                 | PGSC0003DMG400044842 | 780  | 259 | 0 | chr03: 16851119 - 16851898 | 1.9e-176 |
| StWRKY13                 | PGSC0003DMG400019706 | 705  | 234 | 2 | chr04: 52346557 - 52351197 | 8.1e-161 |
| StWRKY14                 | PGSC0003DMG400015104 | 1242 | 413 | 2 | chr02: 36259986 - 36263383 | 4.1e-280 |
| StWRKY15                 | PGSC0003DMG400025481 | 1005 | 334 | 2 | chr02: 45238525 - 45241113 | 2.1e-223 |
| StWRKY16                 | PGSC0003DMG400045376 | 702  | 233 | 0 | chr03: 16845755 - 16846456 | 2.9e-156 |
| StWRKY17                 | PGSC0003DMG400009530 | 1005 | 334 | 2 | chr08: 2675828 - 2677486   | 1.0e-222 |
| StWRKY18-1               | PGSC0003DMG400028520 | 1083 | 360 | 3 | chr06: 43630467 - 43632582 | 2.9e-235 |
| StWRKY18-2               | PGSC0003DMG400007387 | 786  | 261 | 3 | chr08: 29124121 - 29126305 | 6.2e-173 |
| StWRKY20-1               | PGSC0003DMG400022290 | 1791 | 596 | 5 | chr07: 52836856 - 52842040 | 0.0e+00  |
| StWRKY20-2               | PGSC0003DMG400029815 | 1836 | 611 | 5 | chr12: 8679675 - 8687286   | 0.0e+00  |
| StWRKY21-1               | PGSC0003DMG400015076 | 1041 | 346 | 2 | chr09: 38659728 - 38662245 | 4.2e-234 |
| StWRKY21-2               | PGSC0003DMG400005329 | 1068 | 355 | 2 | chr06: 4245698 - 4248974   | 5.5e-239 |
| StWRKY22-1               | PGSC0003DMG400000064 | 1059 | 352 | 2 | chr01: 78848764 - 78850536 | 1.5e-240 |
| StWRKY22-2               | PGSC0003DMG400038269 | 645  | 214 | 2 | chr04: 39779776 - 39780969 | 1.5e-142 |

|            |                      |      |     |   |                            |          |
|------------|----------------------|------|-----|---|----------------------------|----------|
| StWRKY26   | PGSC0003DMG400016769 | 1605 | 534 | 4 | chr06: 42447361 - 42450142 | 0.0e+00  |
| StWRKY27-1 | PGSC0003DMG400036639 | 993  | 330 | 2 | chr05: 51809555 - 51810777 | 2.0e-222 |
| StWRKY27-2 | PGSC0003DMG400035855 | 993  | 330 | 2 | chr05: 51817590 - 51818812 | 2.9e-223 |
| StWRKY27-3 | PGSC0003DMG400041197 | 750  | 249 | 2 | chr03: 15985048 - 15986023 | 4.1e-165 |
| StWRKY27-4 | PGSC0003DMG400040494 | 936  | 311 | 4 | chr04: 39571915 - 39577071 | 1.5e-212 |
| StWRKY28   | PGSC0003DMG400017349 | 960  | 319 | 2 | chr07: 47853245 - 47856367 | 9.1e-219 |
| StWRKY29-1 | PGSC0003DMG400039175 | 750  | 249 | 2 | chr03: 15899673 - 15900656 | 1.6e-164 |
| StWRKY29-2 | PGSC0003DMG400037700 | 996  | 331 | 2 | chr12: 5883133 - 5884370   | 1.3e-206 |
| StWRKY29-3 | PGSC0003DMG400012318 | 924  | 307 | 2 | chr08: 42905115 - 42907300 | 5.9e-224 |
| StWRKY31   | PGSC0003DMG400016441 | 1662 | 553 | 5 | chr02: 57852200 - 57854704 | 0.0e+00  |
| StWRKY32   | PGSC0003DMG400011186 | 369  | 122 | 0 | chr07: 1538218 - 1538879   | 8.5e-80  |
| StWRKY33   | PGSC0003DMG400011633 | 1227 | 408 | 3 | chr09: 27794760 - 27797875 | 2.4e-271 |
| StWRKY34   | PGSC0003DMG400022143 | 2247 | 748 | 4 | chr07: 52032900 - 52037442 | 0.0e+00  |
| StWRKY35   | PGSC0003DMG400009014 | 735  | 244 | 2 | chr01: 68720632 - 68722409 | 2.7e-161 |
| StWRKY39   | PGSC0003DMG401010558 | 627  | 208 | 2 | chr10: 3135795 - 3140230   | 1.6e-143 |
| StWRKY40   | PGSC0003DMG400028633 | 654  | 217 | 3 | chr12: 55913517 - 55914954 | 3.6e-142 |
| StWRKY41-1 | PGSC0003DMG400017990 | 906  | 301 | 2 | chr05: 53958114 - 53961872 | 7.3e-204 |
| StWRKY41-2 | PGSC0003DMG402033880 | 1326 | 441 | 7 | chr05: 53943622 - 53952689 | 2.0e-167 |
| StWRKY41-3 | PGSC0003DMG400009103 | 1071 | 356 | 2 | chr03: 17726994 - 17728611 | 4.4e-242 |
| StWRKY41-4 | PGSC0003DMG400000211 | 1041 | 346 | 2 | chr01: 79359969 - 79362180 | 2.2e-228 |
| StWRKY42   | PGSC0003DMG400022063 | 1491 | 496 | 4 | chr02: 39401006 - 39403181 | 0.0e+00  |
| StWRKY43   | PGSC0003DMG400012317 | 687  | 228 | 1 | chr08: 42891003 - 42893524 | 7.0e-155 |
| StWRKY44   | PGSC0003DMG400010987 | 1404 | 467 | 4 | chr10: 47528890 - 47532355 | 5.8e-313 |
| StWRKY45   | PGSC0003DMG400008188 | 387  | 128 | 1 | chr08: 19161502 - 19162198 | 5.2e-82  |
| StWRKY48-1 | PGSC0003DMG400027208 | 753  | 250 | 2 | chr05: 57842027 - 57843473 | 1.7e-169 |
| StWRKY48-2 | PGSC0003DMG400011457 | 1020 | 339 | 2 | chr01: 31481715 - 31483627 | 5.2e-225 |
| StWRKY50   | PGSC0003DMG401031196 | 417  | 138 | 2 | chr04: 45568942 - 45572943 | 1.5e-92  |
| StWRKY52   | PGSC0003DMG400034476 | 522  | 173 | 0 | chr03: 16847573 - 16848094 | 1.3e-114 |
| StWRKY53-1 | PGSC0003DMG400005836 | 918  | 305 | 2 | chr08: 5076176 - 5080344   | 1.5e-204 |
| StWRKY53-2 | PGSC0003DMG400012160 | 1020 | 339 | 2 | chr08: 42432757 - 42435667 | 5.4e-233 |
| StWRKY53-3 | PGSC0003DMG400005835 | 1083 | 360 | 2 | chr08: 5091167 - 5093192   | 3.5e-249 |
| StWRKY54-1 | PGSC0003DMG400029207 | 882  | 293 | 2 | chr09: 18097627 - 18099365 | 3.1e-198 |
| StWRKY54-2 | PGSC0003DMG401033880 | 996  | 331 | 2 | chr05: 53952944 - 53955543 | 1.0e-226 |

|                        |                      |      |     |   |                            |          |
|------------------------|----------------------|------|-----|---|----------------------------|----------|
| StWRKY57               | PGSC0003DMG400028381 | 981  | 326 | 2 | chr05: 369472 - 375911     | 2.2e-219 |
| StWRKY58               | PGSC0003DMG400028335 | 1527 | 508 | 3 | chr05: 190450 - 195591     | 0.0e+00  |
| StWRKY59-1             | PGSC0003DMG400023196 | 642  | 213 | 2 | chr12: 61495141 - 61497755 | 6.8e-141 |
| StWRKY59-2             | PGSC0003DMG400016957 | 375  | 124 | 1 | chr12: 61548171 - 61549216 | 4.5e-80  |
| StWRKY59-3             | PGSC0003DMG400031140 | 696  | 213 | 2 | chr04: 53285511 - 53288554 | 1.9e-39  |
| StWRKY60-1             | PGSC0003DMG400019824 | 1068 | 355 | 4 | chr03: 42367030 - 42370130 | 3.3e-229 |
| StWRKY60-2             | PGSC0003DMG402007388 | 762  | 253 | 3 | chr08: 29105448 - 29107825 | 4.4e-165 |
| StWRKY61               | PGSC0003DMG400018081 | 1578 | 525 | 4 | chr03: 37657984 - 37662134 | 0.0e+00  |
| StWRKY65               | PGSC0003DMG400028469 | 900  | 299 | 2 | chr02: 53057986 - 53060015 | 5.0e-199 |
| StWRKY70-1             | PGSC0003DMG400027582 | 672  | 223 | 2 | chr06: 31181448 - 31183685 | 7.2e-153 |
| StWRKY70-2             | PGSC0003DMG400020608 | 834  | 277 | 2 | chr03: 29342617 - 29345097 | 7.3e-187 |
| StWRKY70-3             | PGSC0003DMG400008391 | 657  | 218 | 2 | chr10: 45985853 - 45990497 | 1.0e-146 |
| StWRKY70-4             | PGSC0003DMG400033884 | 885  | 294 | 2 | chr05: 53931703 - 53933788 | 4.1e-200 |
| StWRKY74               | PGSC0003DMG400020432 | 771  | 256 | 3 | chr07: 47052377 - 47056216 | 2.5e-176 |
| StWRKY71               | PGSC0003DMG400009703 | 957  | 318 | 2 | chr02: 51758161 - 51759921 | 8.0e-216 |
| StWRKY72               | PGSC0003DMG402006935 | 1332 | 443 | 2 | chr02: 47477448 - 47479898 | 9.2e-291 |
| StWRKY75-1             | PGSC0003DMG400021895 | 519  | 172 | 1 | chr05: 14500093 - 14502731 | 2.5e-112 |
| StWRKY75-2             | PGSC0003DMG400020206 | 426  | 141 | 1 | chr02: 69318661 - 69320526 | 1.2e-94  |
| StWRKY75-3             | PGSC0003DMG400009051 | 954  | 317 | 2 | chr01: 68607070 - 68609524 | 2.9e-217 |
| <i>Sorghum bicolor</i> |                      |      |     |   |                            |          |
| SbWRKY1                | Sb03g000240          | 1713 | 570 | 4 | chr_3: 65767 - 68080       | 0.0e+00  |
| SbWRKY2                | Sb01g027770          | 1284 | 427 | 1 | chr_1: 48360316 - 48361748 | 7.8e-296 |
| SbWRKY3                | Sb01g007570          | 996  | 331 | 2 | chr_1: 6524859 - 6527473   | 3.4e-216 |
| SbWRKY4                | Sb01g007480          | 1275 | 424 | 3 | chr_1: 6420226 - 6422321   | 2.0e-292 |
| SbWRKY6                | Sb01g005070          | 885  | 294 | 3 | chr_1: 4145185 - 4147259   | 9.9e-194 |
| SbWRKY7                | Sb09g026830          | 660  | 219 | 2 | chr_9: 56013261 - 56014828 | 4.3e-138 |
| SbWRKY8                | Sb09g029810          | 1032 | 343 | 2 | chr_9: 58435466 - 58438688 | 1.3e-229 |
| SbWRKY9                | Sb03g011800          | 1749 | 582 | 5 | chr_3: 13453957 - 13459197 | 0.0e+00  |
| SbWRKY10               | Sb03g003360          | 783  | 260 | 2 | chr_3: 3574879 - 3576217   | 3.9e-171 |
| SbWRKY11               | Sb03g028530          | 1086 | 361 | 2 | chr_3: 56464472 - 56466762 | 5.3e-246 |
| SbWRKY12               | Sb03g028440          | 1242 | 413 | 2 | chr_3: 56296964 - 56298895 | 5.9e-279 |
| SbWRKY13               | Sb03g034670          | 933  | 310 | 2 | chr_3: 62841197 - 62843114 | 5.6e-204 |
| SbWRKY14               | Sb03g033640          | 960  | 319 | 1 | chr_3: 61888491 - 61890257 | 3.8e-203 |

|            |             |      |     |   |                             |          |
|------------|-------------|------|-----|---|-----------------------------|----------|
| SbWRKY15-1 | Sb03g029920 | 1041 | 346 | 2 | chr_3: 58204806 - 58206278  | 1.5e-229 |
| SbWRKY15-2 | Sb06g013835 | 702  | 234 | 2 | chr_6: 38137577 - 38138457  | 6.5e-156 |
| SbWRKY16   | Sb03g030480 | 1233 | 410 | 2 | chr_3: 58723799 - 58726767  | 7.1e-276 |
| SbWRKY17   | Sb03g047350 | 1065 | 354 | 2 | chr_3: 74261998 - 74264051  | 1.3e-237 |
| SbWRKY18   | Sb03g038180 | 795  | 264 | 2 | chr_3: 66110932 - 66116172  | 1.1e-182 |
| SbWRKY19   | Sb09g029050 | 819  | 272 | 2 | chr_9: 57799582 - 57800648  | 1.4e-180 |
| SbWRKY20   | Sb03g038190 | 1134 | 377 | 2 | chr_3: 66121144 - 66123805  | 1.0e-259 |
| SbWRKY21   | Sb03g038210 | 834  | 277 | 2 | chr_3: 66144796 - 66146352  | 1.2e-189 |
| SbWRKY22   | Sb03g038170 | 711  | 236 | 2 | chr_3: 66100608 - 66104629  | 1.8e-163 |
| SbWRKY23-1 | Sb03g033780 | 741  | 246 | 1 | chr_3: 62036742 - 62039688  | 1.1e-164 |
| SbWRKY23-2 | Sb09g026350 | 726  | 241 | 1 | chr_9: 55640076 - 55640932  | 1.8e-160 |
| SbWRKY24   | Sb03g038510 | 1758 | 585 | 3 | chr_3: 66433156 - 66435382  | 0.0e+00  |
| SbWRKY26   | Sb03g032800 | 672  | 223 | 2 | chr_3: 61257721 - 61258736  | 1.2e-147 |
| SbWRKY28-2 | Sb10g025590 | 1047 | 348 | 2 | chr_10: 54957968 - 54959405 | 7.3e-226 |
| SbWRKY28-1 | Sb10g025600 | 1029 | 342 | 2 | chr_10: 54965360 - 54966631 | 2.7e-222 |
| SbWRKY29   | Sb02g000960 | 1101 | 366 | 2 | chr_2: 788461 - 793201      | 4.0e-243 |
| SbWRKY30   | Sb07g028430 | 1491 | 496 | 2 | chr_7: 63403512 - 63405506  | 0.0e+00  |
| SbWRKY31-1 | Sb10g019923 | 696  | 232 | 4 | chr_10: 42454390 - 42463629 | 1.2e-151 |
| SbWRKY31-2 | Sb10g020010 | 1053 | 350 | 1 | chr_10: 42717205 - 42718403 | 2.4e-235 |
| SbWRKY32   | Sb04g034440 | 1737 | 578 | 4 | chr_4: 64267731 - 64270424  | 0.0e+00  |
| SbWRKY34   | Sb04g033240 | 705  | 234 | 3 | chr_4: 63147733 - 63151019  | 4.3e-164 |
| SbWRKY35   | Sb06g019710 | 2205 | 734 | 4 | chr_6: 49279763 - 49283771  | 0.0e+00  |
| SbWRKY36   | Sb06g024220 | 747  | 248 | 3 | chr_6: 53339360 - 53343815  | 3.1e-172 |
| SbWRKY37   | Sb06g027290 | 1599 | 532 | 3 | chr_6: 56196796 - 56200982  | 0.0e+00  |
| SbWRKY39   | Sb04g009800 | 1128 | 375 | 2 | chr_4: 12451791 - 12453160  | 3.9e-249 |
| SbWRKY40   | Sb08g002560 | 885  | 294 | 2 | chr_8: 2649149 - 2650571    | 1.5e-199 |
| SbWRKY42   | Sb04g016540 | 726  | 241 | 2 | chr_4: 38362358 - 38364004  | 7.4e-160 |
| SbWRKY43   | Sb09g028750 | 1791 | 596 | 5 | chr_9: 57590098 - 57593135  | 0.0e+00  |
| SbWRKY44   | Sb01g036180 | 987  | 328 | 2 | chr_1: 59806395 - 59807668  | 9.6e-211 |
| SbWRKY45   | Sb08g005080 | 1005 | 334 | 2 | chr_8: 6492893 - 6494646    | 5.4e-218 |
| SbWRKY46   | Sb08g002590 | 666  | 221 | 2 | chr_8: 2673615 - 2675815    | 8.0e-146 |
| SbWRKY47   | Sb02g043030 | 1065 | 354 | 2 | chr_2: 76813673 - 76816113  | 4.4e-231 |
| SbWRKY49   | Sb09g028660 | 1275 | 424 | 2 | chr_9: 57513946 - 57517030  | 2.0e-285 |

|            |             |      |      |   |                            |          |
|------------|-------------|------|------|---|----------------------------|----------|
| SbWRKY50-1 | Sb08g002520 | 1026 | 341  | 2 | chr_8: 2586470 - 2588302   | 1.2e-228 |
| SbWRKY50-2 | Sb07g005740 | 2250 | 749  | 5 | chr_7: 8029114 - 8052209   | 0.0e+00  |
| SbWRKY51   | Sb07g006980 | 957  | 318  | 0 | chr_7: 10712171 - 10713468 | 3.0e-202 |
| SbWRKY53   | Sb09g015900 | 1554 | 517  | 2 | chr_9: 39917155 - 39919621 | 4.7e-264 |
| SbWRKY55   | Sb01g036870 | 678  | 225  | 2 | chr_1: 60434864 - 60436282 | 2.5e-151 |
| SbWRKY57   | Sb07g006230 | 1368 | 455  | 3 | chr_7: 8885371 - 8890727   | 2.7e-312 |
| SbWRKY59   | Sb02g021226 | 4755 | 1584 | 7 | chr_2: 52728488 - 52736582 | 0.0e+00  |
| SbWRKY60   | Sb01g012870 | 303  | 100  | 1 | chr_1: 11944441 - 11945284 | 3.3e-66  |
| SbWRKY62   | Sb02g024765 | 795  | 264  | 1 | chr_2: 59281563 - 59282468 | 3.6e-169 |
| SbWRKY66   | Sb04g030930 | 1494 | 497  | 2 | chr_4: 60932443 - 60936039 | 0.0e+00  |
| SbWRKY67   | Sb09g005700 | 621  | 206  | 2 | chr_9: 7601936 - 7603335   | 1.9e-136 |
| SbWRKY68   | Sb06g027710 | 948  | 315  | 2 | chr_6: 56529226 - 56530621 | 7.5e-205 |
| SbWRKY69   | Sb07g019400 | 1023 | 340  | 0 | chr_7: 50025392 - 50026414 | 1.5e-227 |
| SbWRKY70   | Sb09g023270 | 1782 | 593  | 4 | chr_9: 52888054 - 52890562 | 0.0e+00  |
| SbWRKY71   | Sb04g005520 | 1095 | 364  | 1 | chr_4: 5399378 - 5401080   | 5.6e-236 |
| SbWRKY72   | Sb05g017130 | 678  | 225  | 1 | chr_5: 42145584 - 42148750 | 1.5e-148 |
| SbWRKY73   | Sb03g026280 | 999  | 332  | 1 | chr_3: 52879966 - 52881121 | 1.2e-216 |
| SbWRKY74-1 | Sb02g022290 | 987  | 328  | 2 | chr_2: 55213197 - 55214862 | 3.8e-218 |
| SbWRKY74-2 | Sb02g022280 | 933  | 310  | 2 | chr_2: 55170648 - 55172055 | 1.7e-209 |
| SbWRKY76   | Sb02g024760 | 984  | 327  | 2 | chr_2: 59264547 - 59266116 | 2.0e-210 |
| SbWRKY77   | Sb03g026170 | 651  | 216  | 2 | chr_3: 52684056 - 52684949 | 2.8e-143 |
| SbWRKY78   | Sb02g037660 | 1836 | 611  | 5 | chr_2: 71945697 - 71952038 | 0.0e+00  |
| SbWRKY80   | Sb02g027950 | 1809 | 602  | 4 | chr_2: 63184303 - 63187131 | 0.0e+00  |
| SbWRKY81   | Sb05g001170 | 1086 | 361  | 1 | chr_5: 1225736 - 1226940   | 1.0e-245 |
| SbWRKY82   | Sb07g016330 | 1710 | 569  | 3 | chr_7: 40441219 - 40446915 | 0.0e+00  |
| SbWRKY83-1 | Sb08g020270 | 1116 | 371  | 2 | chr_8: 51276577 - 51278999 | 7.0e-247 |
| SbWRKY83-2 | Sb01g014180 | 1059 | 352  | 3 | chr_1: 13370277 - 13372707 | 1.3e-235 |
| SbWRKY85   | Sb08g016240 | 1491 | 496  | 3 | chr_8: 43243578 - 43248992 | 0.0e+00  |
| SbWRKY86   | Sb03g038200 | 1002 | 333  | 2 | chr_3: 66129723 - 66132439 | 2.5e-223 |
| SbWRKY87   | Sb01g008550 | 1221 | 406  | 2 | chr_1: 7382814 - 7385101   | 2.6e-271 |
| SbWRKY88   | Sb01g000696 | 1152 | 284  | 2 | chr_1: 676390 - 680269     | 9.3e-261 |
| SbWRKY90   | Sb05g001220 | 753  | 250  | 2 | chr_5: 1305458 - 1306752   | 2.2e-168 |
| SbWRKY91   | Sb09g023500 | 708  | 235  | 2 | chr_9: 53146881 - 53149416 | 4.4e-156 |

|                                |                   |      |     |   |                                 |          |
|--------------------------------|-------------------|------|-----|---|---------------------------------|----------|
| SbWRKY92                       | Sb09g029850       | 1008 | 335 | 2 | chr_9: 58485871 - 58487483      | 6.5e-230 |
| SbWRKY93                       | Sb10g004000       | 1137 | 378 | 2 | chr_10: 3530829 - 3534299       | 2.5e-254 |
| SbWRKY94                       | Sb02g008880       | 2865 | 954 | 2 | chr_2: 12422623 - 12426345      | 0.0e+00  |
| SbWRKY95                       | Sb02g011050       | 651  | 216 | 1 | chr_2: 17809234 - 17810769      | 5.9e-145 |
| SbWRKY97                       | Sb03g003370       | 1647 | 548 | 2 | chr_3: 3577819 - 3580200        | 0.0e+00  |
| SbWRKY98-2                     | Sb05g001180       | 771  | 256 | 3 | chr_5: 1246371 - 1247487        | 9.9e-174 |
| SbWRKY98-1                     | Sb08g002570       | 729  | 242 | 2 | chr_8: 2657310 - 2658335        | 1.1e-164 |
| SbWRKY102                      | Sb03g003640       | 888  | 295 | 2 | chr_3: 3846956 - 3853124        | 8.4e-196 |
| SbWRKY103                      | Sb03g039550       | 1134 | 377 | 2 | chr_3: 67223920 - 67229771      | 4.0e-255 |
| SbWRKY105                      | Sb01g032120       | 1497 | 498 | 3 | chr_1: 54964329 - 54971032      | 0.0e+00  |
| SbWRKY106                      | Sb09g010210       | 648  | 215 | 1 | chr_9: 20970162 - 20971240      | 3.2e-144 |
| <i>Thellungiella halophila</i> |                   |      |     |   |                                 |          |
| ThWRKY1                        | Thhalv10002517m.g | 1407 | 468 | 4 | scaffold_4: 3754720 - 3757964   | 6.9e-308 |
| ThWRKY2                        | Thhalv10012829m.g | 2100 | 299 | 4 | scaffold_2: 9972371 - 9976140   | 0.0e+00  |
| ThWRKY3                        | Thhalv10004015m.g | 1551 | 516 | 3 | scaffold_6: 6979477 - 6983641   | 0.0e+00  |
| ThWRKY4                        | Thhalv10007428m.g | 1512 | 503 | 3 | scaffold_5: 10719471 - 10721984 | 0.0e+00  |
| ThWRKY5                        | Thhalv10001624m.g | 666  | 221 | 3 | scaffold_22: 550227 - 551924    | 2.4e-147 |
| ThWRKY6                        | Thhalv10023390m.g | 1671 | 556 | 5 | scaffold_8: 2138453 - 2141101   | 0.0e+00  |
| ThWRKY7                        | Thhalv10025630m.g | 1038 | 345 | 2 | scaffold_1: 6728184 - 6730215   | 1.4e-232 |
| ThWRKY8                        | Thhalv10001240m.g | 972  | 323 | 2 | scaffold_20: 1781088 - 1783559  | 1.3e-215 |
| ThWRKY9                        | Thhalv10018824m.g | 1017 | 338 | 4 | scaffold_9: 6039883 - 6042044   | 5.3e-226 |
| ThWRKY10                       | Thhalv10012199m.g | 1398 | 465 | 5 | scaffold_7: 313134 - 315486     | 1.1e-312 |
| ThWRKY11                       | Thhalv10025646m.g | 1026 | 341 | 2 | scaffold_1: 3593228 - 3594893   | 6.4e-228 |
| ThWRKY13                       | Thhalv10025869m.g | 888  | 295 | 2 | scaffold_1: 478583 - 480996     | 3.0e-202 |
| ThWRKY14                       | Thhalv10007691m.g | 1293 | 430 | 2 | scaffold_5: 4189335 - 4191990   | 2.3e-290 |
| ThWRKY15                       | Thhalv10000270m.g | 894  | 297 | 2 | scaffold_15: 1812727 - 1814105  | 1.1e-190 |
| ThWRKY17                       | Thhalv10000242m.g | 987  | 328 | 2 | scaffold_15: 3376509 - 3378173  | 1.0e-216 |
| ThWRKY18                       | Thhalv10025785m.g | 936  | 311 | 4 | scaffold_1: 3489560 - 3491347   | 2.9e-208 |
| ThWRKY20-1                     | Thhalv10024810m.g | 1683 | 560 | 5 | scaffold_1: 5698571 - 5702218   | 0.0e+00  |
| ThWRKY20-2                     | Thhalv10013115m.g | 1710 | 569 | 5 | scaffold_2: 10342364 - 10345867 | 0.0e+00  |
| ThWRKY21                       | Thhalv10016853m.g | 1083 | 360 | 3 | scaffold_10: 5806177 - 5808438  | 6.5e-243 |
| ThWRKY22                       | Thhalv10028843m.g | 903  | 300 | 2 | scaffold_3: 369110 - 370489     | 1.4e-197 |
| ThWRKY23                       | Thhalv10001802m.g | 1050 | 349 | 2 | scaffold_22: 1570865 - 1572508  | 2.7e-233 |

|          |                   |      |     |   |                                  |          |
|----------|-------------------|------|-----|---|----------------------------------|----------|
| ThWRKY24 | Thhalv10028213m.g | 552  | 183 | 1 | scaffold_14: 2450962 - 2452027   | 9.3e-123 |
| ThWRKY25 | Thhalv10016764m.g | 1182 | 393 | 4 | scaffold_10: 5698352 - 5700434   | 7.9e-266 |
| ThWRKY27 | Thhalv10013872m.g | 1110 | 369 | 2 | scaffold_2: 12216152 - 12217852  | 2.5e-250 |
| ThWRKY28 | Thhalv10025806m.g | 924  | 307 | 2 | scaffold_1: 9606005 - 9607259    | 9.1e-206 |
| ThWRKY29 | Thhalv10025799m.g | 930  | 309 | 2 | scaffold_1: 7080856 - 7082171    | 3.7e-207 |
| ThWRKY30 | Thhalv10004616m.g | 954  | 317 | 2 | scaffold_6: 3078865 - 3080289    | 3.7e-214 |
| ThWRKY31 | Thhalv10026864m.g | 1617 | 538 | 5 | scaffold_1: 7725182 - 7727910    | 0.0e+00  |
| ThWRKY32 | Thhalv10025126m.g | 1401 | 466 | 4 | scaffold_1: 3853663 - 3856005    | 4.2e-307 |
| ThWRKY33 | Thhalv10016542m.g | 1521 | 506 | 4 | scaffold_10: 9772299 - 9775039   | 0.0e+00  |
| ThWRKY34 | Thhalv10027010m.g | 1719 | 527 | 3 | scaffold_1: 5792491 - 5794492    | 0.0e+00  |
| ThWRKY35 | Thhalv10016714m.g | 1266 | 421 | 2 | scaffold_10: 7945036 - 7947706   | 3.0e-280 |
| ThWRKY36 | Thhalv10018677m.g | 1185 | 394 | 3 | scaffold_9: 4864156 - 4866701    | 1.1e-261 |
| ThWRKY38 | Thhalv10015295m.g | 663  | 220 | 2 | scaffold_2: 7652476 - 7653440    | 7.4e-150 |
| ThWRKY39 | Thhalv10021115m.g | 993  | 330 | 2 | scaffold_13: 8141840 - 8143841   | 2.4e-221 |
| ThWRKY40 | Thhalv10018925m.g | 918  | 305 | 3 | scaffold_9: 416177 - 418000      | 6.6e-195 |
| ThWRKY41 | Thhalv10028794m.g | 993  | 330 | 2 | scaffold_3: 5016482 - 5017908    | 5.5e-227 |
| ThWRKY42 | Thhalv10028586m.g | 1539 | 512 | 5 | scaffold_3: 2472439 - 2475201    | 0.0e+00  |
| ThWRKY43 | Thhalv10001738m.g | 297  | 98  | 1 | scaffold_22: 1103090 - 1103499   | 3.6e-63  |
| ThWRKY44 | Thhalv10016692m.g | 1290 | 429 | 3 | scaffold_10: 9129711 - 9131302   | 1.1e-288 |
| ThWRKY46 | Thhalv10001568m.g | 885  | 294 | 2 | scaffold_22: 1194909 - 1196112   | 4.8e-193 |
| ThWRKY47 | Thhalv10028616m.g | 1464 | 487 | 5 | scaffold_3: 779279 - 782717      | 0.0e+00  |
| ThWRKY48 | Thhalv10004295m.g | 1257 | 418 | 2 | scaffold_6: 4553416 - 4555540    | 2.6e-276 |
| ThWRKY49 | Thhalv10003250m.g | 927  | 308 | 3 | scaffold_17: 2067934 - 2069182   | 3.4e-211 |
| ThWRKY50 | Thhalv10005029m.g | 507  | 168 | 2 | scaffold_6: 3831112 - 3832190    | 6.7e-111 |
| ThWRKY51 | Thhalv10004930m.g | 618  | 205 | 2 | scaffold_6: 1118112 - 1119657    | 5.0e-138 |
| ThWRKY53 | Thhalv10025724m.g | 972  | 323 | 2 | scaffold_1: 6946602 - 6948343    | 2.5e-220 |
| ThWRKY54 | Thhalv10016713m.g | 1269 | 422 | 4 | scaffold_10: 10920790 - 10923282 | 2.0e-230 |
| ThWRKY55 | Thhalv10017926m.g | 864  | 288 | 2 | scaffold_10: 10916595 - 10918437 | 8.7e-195 |
| ThWRKY56 | Thhalv10024097m.g | 582  | 193 | 1 | scaffold_8: 574763 - 577071      | 5.1e-131 |
| ThWRKY57 | Thhalv10018976m.g | 846  | 281 | 3 | scaffold_9: 5230131 - 5233918    | 1.5e-189 |
| ThWRKY58 | Thhalv10020676m.g | 1401 | 466 | 3 | scaffold_13: 9110201 - 9112381   | 0.0e+00  |
| ThWRKY59 | Thhalv10000331m.g | 594  | 197 | 2 | scaffold_15: 497862 - 499813     | 5.9e-133 |
| ThWRKY60 | Thhalv10000288m.g | 810  | 269 | 4 | scaffold_15: 4535360 - 4537096   | 2.0e-176 |

|                        |                   |      |      |    |                                 |          |
|------------------------|-------------------|------|------|----|---------------------------------|----------|
| ThWRKY61               | Thhalv10007461m.g | 1485 | 494  | 3  | scaffold_5: 9013345 - 9015895   | 0.0e+00  |
| ThWRKY62               | Thhalv10014700m.g | 618  | 205  | 2  | scaffold_2: 48116 - 48933       | 4.6e-138 |
| ThWRKY64               | Thhalv10029232m.g | 777  | 258  | 2  | scaffold_3: 8505663 - 8506772   | 3.8e-177 |
| ThWRKY65               | Thhalv10008510m.g | 789  | 262  | 1  | scaffold_5: 5062361 - 5063616   | 3.8e-176 |
| ThWRKY67               | Thhalv10000686m.g | 945  | 314  | 2  | scaffold_15: 4860365 - 4861501  | 3.6e-216 |
| ThWRKY68               | Thhalv10006458m.g | 843  | 280  | 2  | scaffold_19: 375201 - 376245    | 3.0e-192 |
| ThWRKY69               | Thhalv10006157m.g | 825  | 274  | 2  | scaffold_19: 1670395 - 1672193  | 2.3e-185 |
| ThWRKY70               | Thhalv10006146m.g | 843  | 280  | 2  | scaffold_19: 2581646 - 2583479  | 4.9e-190 |
| ThWRKY71               | Thhalv10009672m.g | 867  | 288  | 2  | scaffold_5: 4862758 - 4863999   | 1.2e-195 |
| ThWRKY72               | Thhalv10013146m.g | 1674 | 557  | 3  | scaffold_2: 4987474 - 4990084   | 0.0e+00  |
| ThWRKY74               | Thhalv10004506m.g | 1044 | 347  | 3  | scaffold_6: 4433212 - 4435365   | 1.3e-234 |
| ThWRKY75               | Thhalv10014943m.g | 444  | 147  | 1  | scaffold_2: 4223260 - 4224612   | 8.3e-95  |
| <i>Theobroma cacao</i> |                   |      |      |    |                                 |          |
| TcWRKY1                | Thecc1EG002318    | 1512 | 503  | 4  | scaffold_1: 13136653 - 13139992 | 0.0e+00  |
| TcWRKY2                | Thecc1EG025248    | 2271 | 756  | 6  | scaffold_5: 31469642 - 31478174 | 0.0e+00  |
| TcWRKY3                | Thecc1EG011624    | 1695 | 564  | 4  | scaffold_2: 40994929 - 40999502 | 0.0e+00  |
| TcWRKY5                | Thecc1EG005744    | 624  | 207  | 3  | scaffold_1: 38058528 - 38061344 | 7.3e-140 |
| TcWRKY6                | Thecc1EG030835    | 1743 | 580  | 5  | scaffold_7: 1572272 - 1575629   | 0.0e+00  |
| TcWRKY7                | Thecc1EG033777    | 1080 | 359  | 2  | scaffold_8: 126632 - 128568     | 7.0e-241 |
| TcWRKY9                | Thecc1EG006426    | 1575 | 524  | 5  | scaffold_2: 2175028 - 2179597   | 0.0e+00  |
| TcWRKY11               | Thecc1EG036832    | 1023 | 340  | 2  | scaffold_9: 433148 - 435462     | 3.3e-223 |
| TcWRKY13               | Thecc1EG001282    | 681  | 226  | 2  | scaffold_1: 6276279 - 6281251   | 1.3e-153 |
| TcWRKY14               | Thecc1EG026992    | 1281 | 426  | 2  | scaffold_6: 672373 - 675634     | 7.7e-282 |
| TcWRKY15               | Thecc1EG000680    | 1047 | 348  | 3  | scaffold_1: 2983189 - 2986450   | 1.5e-226 |
| TcWRKY16               | Thecc1EG014419    | 3237 | 1078 | 10 | scaffold_3: 22285422 - 22297067 | 0.0e+00  |
| TcWRKY18               | Thecc1EG036912    | 768  | 255  | 3  | scaffold_9: 818257 - 820009     | 3.0e-166 |
| TcWRKY20               | Thecc1EG030735    | 1701 | 566  | 5  | scaffold_7: 1124618 - 1129178   | 0.0e+00  |
| TcWRKY21               | Thecc1EG004187    | 1059 | 352  | 2  | scaffold_1: 30142184 - 30144556 | 7.7e-235 |
| TcWRKY22-1             | Thecc1EG005261    | 1023 | 340  | 2  | scaffold_1: 35798144 - 35800148 | 1.9e-225 |
| TcWRKY22-2             | Thecc1EG016343    | 960  | 319  | 2  | scaffold_3: 32461030 - 32462557 | 1.5e-217 |
| TcWRKY23-1             | Thecc1EG004843    | 984  | 327  | 2  | scaffold_1: 33736924 - 33739413 | 1.7e-223 |
| TcWRKY23-2             | Thecc1EG021400    | 1086 | 361  | 2  | scaffold_4: 32908685 - 32910524 | 4.5e-241 |
| TcWRKY26               | Thecc1EG042240    | 1818 | 605  | 5  | scaffold_9: 41643864 - 41648918 | 0.0e+00  |



|            |                |      |      |    |                                   |          |
|------------|----------------|------|------|----|-----------------------------------|----------|
| TcWRKY27   | Thecc1EG046204 | 1638 | 545  | 4  | scaffold_112: 1 - 4171            | 0.0e+00  |
| TcWRKY30   | Thecc1EG006109 | 4350 | 1449 | 11 | scaffold_2: 820964 - 828678       | 0.0e+00  |
| TcWRKY31   | Thecc1EG002087 | 1899 | 632  | 5  | scaffold_1: 11532303 - 11536231   | 0.0e+00  |
| TcWRKY32   | Thecc1EG037060 | 1524 | 507  | 4  | scaffold_9: 1542222 - 1546629     | 0.0e+00  |
| TcWRKY33   | Thecc1EG021580 | 3717 | 1238 | 12 | scaffold_5: 306561 - 315476       | 0.0e+00  |
| TcWRKY34   | Thecc1EG030504 | 2115 | 704  | 6  | scaffold_7: 49476 - 54345         | 0.0e+00  |
| TcWRKY35-1 | Thecc1EG004820 | 810  | 269  | 3  | scaffold_1: 33627856 - 33631800   | 5.2e-178 |
| TcWRKY35-2 | Thecc1EG016012 | 927  | 308  | 3  | scaffold_3: 30839940 - 30843967   | 3.3e-206 |
| TcWRKY39   | Thecc1EG026314 | 1059 | 352  | 2  | scaffold_5: 37657896 - 37660017   | 1.6e-238 |
| TcWRKY40-1 | Thecc1EG027435 | 930  | 309  | 4  | scaffold_6: 3870167 - 3872047     | 3.5e-194 |
| TcWRKY40-2 | Thecc1EG036913 | 930  | 309  | 4  | scaffold_9: 824894 - 827211       | 6.1e-204 |
| TcWRKY41-1 | Thecc1EG015346 | 1086 | 361  | 3  | scaffold_3: 27474680 - 27479693   | 5.5e-243 |
| TcWRKY41-2 | Thecc1EG016426 | 1080 | 359  | 2  | scaffold_3: 32846398 - 32848357   | 2.4e-246 |
| TcWRKY42   | Thecc1EG030268 | 1782 | 593  | 5  | scaffold_6: 26458212 - 26461307   | 0.0e+00  |
| TcWRKY43   | Thecc1EG005256 | 660  | 219  | 2  | scaffold_1: 35781448 - 35783914   | 4.5e-146 |
| TcWRKY44   | Thecc1EG022065 | 1425 | 474  | 7  | scaffold_5: 2446310 - 2451444     | 0.0e+00  |
| TcWRKY45   | Thecc1EG014673 | 492  | 163  | 1  | scaffold_3: 23785784 - 23786854   | 3.6e-108 |
| TcWRKY46   | Thecc1EG005179 | 1059 | 352  | 2  | scaffold_1: 35465515 - 35468270   | 8.6e-237 |
| TcWRKY47   | Thecc1EG004951 | 1536 | 511  | 6  | scaffold_1: 34290842 - 34294453   | 0.0e+00  |
| TcWRKY49   | Thecc1EG021911 | 1200 | 399  | 3  | scaffold_5: 1731425 - 1735591     | 8.4e-273 |
| TcWRKY50-1 | Thecc1EG035897 | 696  | 231  | 2  | scaffold_8: 13601328 - 13603184   | 1.4e-157 |
| TcWRKY50-2 | Thecc1EG037343 | 480  | 159  | 2  | scaffold_9: 2972731 - 2974198     | 1.1e-105 |
| TcWRKY51   | Thecc1EG001265 | 738  | 245  | 2  | scaffold_1: 6138938 - 6143183     | 1.0e-168 |
| TcWRKY52   | Thecc1EG014427 | 873  | 290  | 3  | scaffold_3: 22360304 - 22364674   | 1.2e-195 |
| TcWRKY53-1 | Thecc1EG006116 | 4143 | 1380 | 5  | scaffold_2: 845249 - 851848       | 0.0e+00  |
| TcWRKY53-2 | Thecc1EG006103 | 4596 | 1531 | 12 | scaffold_2: 805474 - 814178       | 0.0e+00  |
| TcWRKY54   | Thecc1EG045556 | 888  | 295  | 3  | scaffold_10r: 25159496 - 25164739 | 2.7e-200 |
| TcWRKY55   | Thecc1EG045555 | 1134 | 377  | 2  | scaffold_10r: 25156194 - 25159321 | 4.9e-253 |
| TcWRKY57   | Thecc1EG011578 | 915  | 304  | 3  | scaffold_2: 40794286 - 40799502   | 4.7e-204 |
| TcWRKY58   | Thecc1EG018667 | 1563 | 520  | 4  | scaffold_4: 17119792 - 17124222   | 0.0e+00  |
| TcWRKY65   | Thecc1EG029654 | 861  | 286  | 2  | scaffold_6: 23693151 - 23694650   | 7.6e-190 |
| TcWRKY70   | Thecc1EG019689 | 858  | 285  | 3  | scaffold_4: 24307987 - 24314095   | 4.4e-189 |
| TcWRKY71-1 | Thecc1EG001885 | 951  | 316  | 2  | scaffold_1: 10031710 - 10034197   | 7.7e-213 |

|                       |                   |      |     |   |                                 |          |
|-----------------------|-------------------|------|-----|---|---------------------------------|----------|
| TcWRKY71-2            | Thecc1EG029543    | 1116 | 371 | 5 | scaffold_6: 23115925 - 23128951 | 5.8e-252 |
| TcWRKY72-1            | Thecc1EG013860    | 1839 | 612 | 5 | scaffold_3: 17944872 - 17949398 | 0.0e+00  |
| TcWRKY72-2            | Thecc1EG018403    | 1713 | 570 | 5 | scaffold_4: 14416116 - 14432532 | 0.0e+00  |
| TcWRKY72-3            | Thecc1EG011792    | 1815 | 604 | 4 | scaffold_2: 41755644 - 41759595 | 0.0e+00  |
| TcWRKY75-1            | Thecc1EG017248    | 534  | 177 | 1 | scaffold_4: 2544051 - 2545769   | 1.7e-117 |
| TcWRKY75-2            | Thecc1EG008635    | 558  | 185 | 1 | scaffold_2: 15575303 - 15578776 | 1.9e-121 |
| <i>Vitis vinifera</i> |                   |      |     |   |                                 |          |
| VvWRKY1               | GSVIVT01030046001 | 1095 | 364 | 5 | chr12: 9116731 - 9122807        | 2.1e-234 |
| VvWRKY2               | GSVIVT01014854001 | 1869 | 622 | 8 | chr19: 10665036 - 10669055      | 0.0e+00  |
| VvWRKY3               | GSVIVT01001332001 | 1308 | 435 | 5 | chr1_random: 297660 - 312015    | 5.1e-273 |
| VvWRKY5               | GSVIVT01018300001 | 687  | 228 | 3 | chr15: 11498970 - 11504729      | 2.0e-118 |
| VvWRKY6               | GSVIVT01012682001 | 1533 | 510 | 6 | chr10: 618603 - 621252          | 0.0e+00  |
| VvWRKY7               | GSVIVT01009441001 | 960  | 319 | 4 | chr18: 8391930 - 8393726        | 7.3e-211 |
| VvWRKY9               | GSVIVT01029688001 | 1473 | 490 | 5 | chr12: 13065135 - 13099628      | 0.0e+00  |
| VvWRKY10              | GSVIVT01035965001 | 1593 | 530 | 5 | chr4: 6569931 - 6576637         | 0.0e+00  |
| VvWRKY11              | GSVIVT01029265001 | 840  | 279 | 3 | chr11: 17821900 - 17823266      | 2.1e-177 |
| VvWRKY13              | GSVIVT01022259001 | 681  | 226 | 2 | chr7: 17958306 - 17960930       | 1.3e-153 |
| VvWRKY14              | GSVIVT01021765001 | 1266 | 421 | 3 | chr10: 10755760 - 10759820      | 1.6e-232 |
| VvWRKY15              | GSVIVT01022067001 | 843  | 280 | 4 | chr7: 16322549 - 16324116       | 3.2e-143 |
| VvWRKY17              | GSVIVT01033188001 | 804  | 267 | 4 | chr4: 9363169 - 9365026         | 9.4e-170 |
| VvWRKY18              | GSVIVT01035885001 | 861  | 286 | 5 | chr4: 5265806 - 5268041         | 9.7e-181 |
| VvWRKY20-1            | GSVIVT01037775001 | 1659 | 552 | 5 | chr19: 7760186 - 7767468        | 0.0e+00  |
| VvWRKY20-2            | GSVIVT01007006001 | 5625 | 550 | 5 | chrUn: 29694308 - 29699639      | 0.0e+00  |
| VvWRKY21-1            | GSVIVT01000752001 | 855  | 284 | 4 | chr7: 381035 - 383836           | 3.5e-185 |
| VvWRKY21-2            | GSVIVT01036223001 | 915  | 304 | 4 | chr14: 8753538 - 8756300        | 4.9e-194 |
| VvWRKY23              | GSVIVT01028147001 | 909  | 302 | 2 | chr7: 4200160 - 4202241         | 2.7e-204 |
| VvWRKY26              | GSVIVT01019109001 | 1461 | 486 | 4 | chr4: 16664476 - 16666741       | 2.9e-293 |
| VvWRKY27-1            | GSVIVT01026965001 | 1047 | 348 | 2 | chr15: 18957231 - 18958817      | 2.9e-237 |
| VvWRKY27-2            | GSVIVT01028823001 | 549  | 182 | 1 | chr16: 18360079 - 18360711      | 2.1e-118 |
| VvWRKY29              | GSVIVT01019419001 | 972  | 323 | 2 | chr2: 512163 - 513533           | 1.3e-220 |
| VvWRKY30              | GSVIVT01027069001 | 1083 | 360 | 4 | chr15: 18191021 - 18193489      | 4.4e-209 |
| VvWRKY31              | GSVIVT01030453001 | 1497 | 498 | 7 | chr12: 5678707 - 5681171        | 4.9e-311 |
| VvWRKY32              | GSVIVT01023600001 | 1500 | 499 | 5 | chr11: 7835815 - 7846137        | 0.0e+00  |

|                       |                   |      |      |    |                                 |          |
|-----------------------|-------------------|------|------|----|---------------------------------|----------|
| VvWRKY33-1            | GSVIVT01030258001 | 1542 | 513  | 4  | chr8: 9796056 - 9798907         | 0.0e+00  |
| VvWRKY33-2            | GSVIVT01024624001 | 1713 | 570  | 10 | chr6: 8290025 - 8295109         | 1.9e-314 |
| VvWRKY35              | GSVIVT01028129001 | 729  | 242  | 3  | chr7: 4044128 - 4045807         | 4.0e-163 |
| VvWRKY40              | GSVIVT01015952001 | 837  | 278  | 5  | chr9: 16094219 - 16096253       | 3.5e-176 |
| VvWRKY41              | GSVIVT01019511001 | 1029 | 342  | 2  | chr2: 1228314 - 1229702         | 3.3e-239 |
| VvWRKY42              | GSVIVT01037686001 | 1491 | 496  | 5  | chr19: 6882419 - 6884988        | 0.0e+00  |
| VvWRKY43              | GSVIVT01026969001 | 606  | 201  | 1  | chr15: 18940954 - 18942146      | 4.1e-135 |
| VvWRKY44              | GSVIVT01025562001 | 1317 | 438  | 7  | chr8: 14033451 - 14039562       | 2.6e-287 |
| VvWRKY46              | GSVIVT01028718001 | 1095 | 364  | 2  | chr16: 19477141 - 19479868      | 1.7e-246 |
| VvWRKY47              | GSVIVT01028244001 | 1440 | 479  | 6  | chr7: 4899927 - 4903175         | 6.7e-310 |
| VvWRKY48              | GSVIVT01034968001 | 930  | 309  | 2  | chr5: 530084 - 531773           | 8.8e-204 |
| VvWRKY49              | GSVIVT01034148001 | 900  | 299  | 2  | chr8: 14828040 - 14830056       | 2.8e-198 |
| VvWRKY50              | GSVIVT01035426001 | 501  | 166  | 2  | chr4: 1209585 - 1211712         | 3.6e-108 |
| VvWRKY51-1            | GSVIVT01033194001 | 471  | 156  | 2  | chr4: 9399944 - 9400803         | 2.5e-104 |
| VvWRKY51-2            | GSVIVT01033195001 | 306  | 101  | 1  | chr4: 9409805 - 9411286         | 1.4e-67  |
| VvWRKY51-3            | GSVIVT01022245001 | 582  | 193  | 2  | chr7: 17794379 - 17797240       | 8.7e-120 |
| VvWRKY54              | GSVIVT01030174001 | 996  | 331  | 4  | chr8: 10843756 - 10846082       | 7.1e-216 |
| VvWRKY55              | GSVIVT01032662001 | 927  | 308  | 3  | chr13: 1716836 - 1718836        | 6.7e-203 |
| VvWRKY57-1            | GSVIVT01012196001 | 852  | 283  | 5  | chr1: 628682 - 633595           | 4.2e-183 |
| VvWRKY57-2            | GSVIVT01021397001 | 960  | 319  | 2  | chr10: 4894476 - 4896340        | 7.9e-217 |
| VvWRKY58              | GSVIVT01011472001 | 2670 | 889  | 16 | chr14: 29916400 - 29925511      | 0.0e+00  |
| VvWRKY60              | GSVIVT01035884001 | 789  | 262  | 3  | chr4: 5247592 - 5248886         | 4.9e-175 |
| VvWRKY61              | GSVIVT01020060001 | 1785 | 594  | 4  | chr1: 10977206 - 10982423       | 0.0e+00  |
| VvWRKY69              | GSVIVT01021252001 | 837  | 278  | 2  | chr10: 3008687 - 3010451        | 3.4e-187 |
| VvWRKY70              | GSVIVT01032661001 | 867  | 288  | 3  | chr13: 1719393 - 1720884        | 1.8e-186 |
| VvWRKY71              | GSVIVT01020864001 | 936  | 311  | 2  | chr12: 878934 - 881289          | 2.3e-215 |
| VvWRKY72-1            | GSVIVT01008046001 | 1818 | 605  | 5  | chr17: 6316168 - 6320317        | 0.0e+00  |
| VvWRKY72-2            | GSVIVT01011356001 | 1509 | 502  | 3  | chr14: 28923786 - 28926499      | 0.0e+00  |
| VvWRKY75-1            | GSVIVT01010525001 | 570  | 189  | 1  | chr1: 21460123 - 21461397       | 1.9e-126 |
| VvWRKY75-2            | GSVIVT01008553001 | 456  | 151  | 1  | chr17: 922600 - 925171          | 1.3e-101 |
| <i>Volvox carteri</i> |                   |      |      |    |                                 |          |
| VcWRKY4               | Vocar20009416m.g  | 1908 | 635  | 10 | scaffold_1: 13925593 - 13929564 | 4.6e-250 |
| VcWRKY33              | Vocar20013412m.g  | 3552 | 1183 | 20 | scaffold_58: 216444 - 231417    | 0.0e+00  |

*Zea mays*

|            |                  |      |     |   |                             |          |
|------------|------------------|------|-----|---|-----------------------------|----------|
| ZmWRKY1    | GRMZM5G871347    | 1359 | 453 | 3 | Chr3: 1260878 - 1262711     | 1.5e-180 |
| ZmWRKY2    | GRMZM2G383594    | 1323 | 440 | 1 | Chr1: 105951470 - 105952881 | 2.1e-300 |
| ZmWRKY3-1  | GRMZM2G018721    | 999  | 332 | 2 | Chr7: 1920108 - 1921464     | 2.2e-218 |
| ZmWRKY3-2  | GRMZM2G143204    | 996  | 331 | 3 | Chr1: 278162171 - 278165808 | 7.5e-219 |
| ZmWRKY4    | GRMZM2G008029    | 1353 | 450 | 3 | Chr1: 278602439 - 278604715 | 9.2e-313 |
| ZmWRKY6    | GRMZM2G164082    | 1263 | 420 | 2 | Chr1: 288695814 - 288697843 | 4.2e-275 |
| ZmWRKY7    | GRMZM5G863420    | 666  | 221 | 2 | Chr6: 161477481 - 161478917 | 7.1e-143 |
| ZmWRKY9-1  | GRMZM2G327349    | 1746 | 581 | 5 | Chr3: 49562769 - 49566492   | 0.0e+00  |
| ZmWRKY9-2  | GRMZM2G092694    | 924  | 307 | 5 | Chr8: 653032 - 655605       | 6.7e-207 |
| ZmWRKY9-3  | GRMZM2G448605    | 1833 | 610 | 5 | Chr8: 71057846 - 71061504   | 0.0e+00  |
| ZmWRKY10-1 | GRMZM2G516301    | 690  | 229 | 2 | Chr8: 19834281 - 19835285   | 5.7e-155 |
| ZmWRKY10-2 | GRMZM2G475984    | 822  | 273 | 2 | Chr3: 8213140 - 8214362     | 1.9e-180 |
| ZmWRKY11-1 | AC198725.4_FG009 | 1059 | 352 | 2 | Chr3: 217212884 - 217215223 | 1.5e-240 |
| ZmWRKY11-2 | GRMZM2G145554    | 1080 | 359 | 2 | Chr8: 145527152 - 145529521 | 2.7e-246 |
| ZmWRKY12-1 | GRMZM2G105140    | 1038 | 345 | 2 | Chr3: 217462232 - 217464089 | 1.3e-226 |
| ZmWRKY12-2 | GRMZM2G414315    | 1044 | 347 | 2 | Chr8: 74902322 - 74903632   | 1.0e-234 |
| ZmWRKY12-3 | GRMZM2G138683    | 1401 | 466 | 2 | Chr4: 158861929 - 158866266 | 0.0e+00  |
| ZmWRKY13-1 | GRMZM2G141299    | 921  | 306 | 2 | Chr3: 198214591 - 198216492 | 2.1e-203 |
| ZmWRKY13-2 | GRMZM2G013391    | 834  | 277 | 2 | Chr8: 174376651 - 174378151 | 4.7e-184 |
| ZmWRKY14   | GRMZM2G040298    | 864  | 287 | 1 | Chr3: 201013567 - 201015203 | 3.6e-187 |
| ZmWRKY15-1 | GRMZM2G411766    | 984  | 327 | 2 | Chr8: 148006878 - 148008698 | 2.4e-220 |
| ZmWRKY15-2 | GRMZM2G408462    | 1005 | 334 | 2 | Chr3: 212739888 - 212741309 | 4.3e-224 |
| ZmWRKY16-1 | GRMZM2G151763    | 1146 | 381 | 2 | Chr3: 210977929 - 210981079 | 1.2e-258 |
| ZmWRKY16-2 | GRMZM5G812272    | 1245 | 414 | 2 | Chr8: 149077318 - 149080011 | 4.2e-132 |
| ZmWRKY17   | GRMZM2G149219    | 300  | 99  | 1 | Chr1: 258955026 - 258956380 | 5.4e-67  |
| ZmWRKY18   | GRMZM2G065290    | 792  | 263 | 2 | Chr3: 184932051 - 184941349 | 2.0e-180 |
| ZmWRKY19   | GRMZM2G063880    | 774  | 257 | 2 | Chr8: 72382998 - 72384377   | 5.5e-172 |
| ZmWRKY20   | GRMZM2G029282    | 1131 | 376 | 2 | Chr8: 170352645 - 170355460 | 2.0e-258 |
| ZmWRKY21-1 | GRMZM2G059562    | 813  | 270 | 2 | Chr3: 184816891 - 184818185 | 1.7e-181 |
| ZmWRKY21-2 | GRMZM2G432583    | 954  | 317 | 2 | Chr8: 119035678 - 119037047 | 3.7e-216 |
| ZmWRKY22   | GRMZM2G382350    | 723  | 240 | 2 | Chr3: 185029884 - 185034399 | 9.6e-165 |
| ZmWRKY23-1 | GRMZM2G111354    | 684  | 227 | 1 | Chr8: 175697173 - 175698487 | 6.1e-151 |

|            |                  |      |     |   |                              |          |
|------------|------------------|------|-----|---|------------------------------|----------|
| ZmWRKY23-2 | GRMZM2G015433    | 690  | 229 | 1 | Chr8: 124950950 - 124952109  | 2.1e-153 |
| ZmWRKY23-3 | GRMZM2G401521    | 1005 | 334 | 0 | Chr6: 159824142 - 159825486  | 1.1e-198 |
| ZmWRKY24-1 | GRMZM2G148087    | 1668 | 555 | 4 | Chr3: 183888339 - 183891343  | 0.0e+00  |
| ZmWRKY24-2 | GRMZM2G036703    | 1782 | 593 | 4 | Chr8: 170094714 - 170097223  | 0.0e+00  |
| ZmWRKY25-1 | GRMZM2G148561    | 921  | 306 | 0 | Chr4: 69920108 - 69921324    | 3.7e-197 |
| ZmWRKY25-2 | GRMZM2G090594    | 936  | 311 | 0 | Chr10: 68725531 - 68726795   | 2.4e-200 |
| ZmWRKY26   | GRMZM2G101405    | 642  | 213 | 2 | Chr3: 203083255 - 203084247  | 7.0e-142 |
| ZmWRKY27-1 | GRMZM2G304573    | 897  | 298 | 1 | Chr8: 139951730 - 139952759  | 3.7e-198 |
| ZmWRKY27-2 | GRMZM5G851490    | 1530 | 509 | 4 | Chr10: 87094728 - 87099466   | 0.0e+00  |
| ZmWRKY27-3 | GRMZM2G354384    | 516  | 171 | 0 | Chr3: 221277867 - 221278550  | 1.1e-110 |
| ZmWRKY28   | GRMZM2G111711    | 1056 | 351 | 2 | Chr9: 103075648 - 103077219  | 6.7e-229 |
| ZmWRKY30   | GRMZM2G027972    | 2190 | 729 | 3 | Chr4: 198130795 - 198133409  | 0.0e+00  |
| ZmWRKY31-1 | GRMZM2G006497    | 1026 | 341 | 1 | Chr8: 13136608 - 13138411    | 7.6e-232 |
| ZmWRKY31-2 | GRMZM2G156529    | 756  | 251 | 1 | Chr6: 110436475 - 110437394  | 7.7e-169 |
| ZmWRKY35-1 | GRMZM2G031963    | 2019 | 672 | 5 | Chr10: 124659347 - 124664396 | 0.0e+00  |
| ZmWRKY35-2 | GRMZM5G816457    | 2112 | 703 | 5 | Chr2: 38760033 - 38765436    | 0.0e+00  |
| ZmWRKY36-1 | GRMZM2G123387    | 855  | 284 | 3 | Chr2: 21500615 - 21505542    | 1.0e-196 |
| ZmWRKY36-2 | GRMZM2G377217    | 708  | 235 | 3 | Chr4: 151070766 - 151082721  | 3.8e-164 |
| ZmWRKY37   | AC208110.2_FG001 | 1584 | 527 | 3 | Chr10: 140656185 - 140659057 | 0.0e+00  |
| ZmWRKY39-1 | GRMZM2G038158    | 1113 | 370 | 2 | Chr4: 223519261 - 223521139  | 1.9e-245 |
| ZmWRKY39-2 | GRMZM2G048450    | 1152 | 383 | 2 | Chr5: 138345948 - 138348076  | 1.1e-255 |
| ZmWRKY42   | GRMZM2G073272    | 978  | 325 | 2 | Chr5: 159232314 - 159233527  | 4.5e-218 |
| ZmWRKY43   | GRMZM2G366795    | 1680 | 559 | 5 | Chr6: 165021433 - 165023895  | 0.0e+00  |
| ZmWRKY45   | GRMZM2G004060    | 1146 | 381 | 2 | Chr10: 12103219 - 12104937   | 1.8e-248 |
| ZmWRKY46   | GRMZM2G063216    | 687  | 228 | 2 | Chr4: 184639458 - 184643071  | 3.8e-153 |
| ZmWRKY47   | GRMZM2G381378    | 1017 | 338 | 2 | Chr7: 173221792 - 173223897  | 5.2e-218 |
| ZmWRKY49   | GRMZM2G453571    | 1227 | 408 | 2 | Chr6: 164799868 - 164802835  | 8.0e-272 |
| ZmWRKY50   | GRMZM2G005207    | 975  | 324 | 2 | Chr10: 3992095 - 3994352     | 1.5e-219 |
| ZmWRKY52   | GRMZM2G099593    | 1053 | 350 | 1 | Chr2: 151734355 - 151735768  | 1.1e-238 |
| ZmWRKY53-1 | GRMZM2G012724    | 1470 | 489 | 2 | Chr6: 141413048 - 141415248  | 0.0e+00  |
| ZmWRKY53-2 | GRMZM2G449681    | 1497 | 498 | 1 | Chr8: 110214059 - 110216431  | 0.0e+00  |
| ZmWRKY55-1 | GRMZM2G030272    | 645  | 214 | 2 | Chr1: 52919938 - 52921358    | 6.8e-143 |
| ZmWRKY55-2 | GRMZM2G060918    | 591  | 196 | 2 | Chr9: 133694708 - 133696240  | 2.0e-126 |

|            |               |      |     |   |                              |          |
|------------|---------------|------|-----|---|------------------------------|----------|
| ZmWRKY56   | GRMZM2G441031 | 861  | 286 | 2 | Chr10: 4032506 - 4034042     | 4.6e-194 |
| ZmWRKY57   | GRMZM2G020254 | 750  | 249 | 4 | Chr10: 65416247 - 65418035   | 7.1e-154 |
| ZmWRKY58   | GRMZM2G178671 | 543  | 181 | 1 | Chr3: 180598307 - 180598998  | 4.7e-86  |
| ZmWRKY60   | GRMZM2G161411 | 423  | 140 | 2 | Chr5: 15320902 - 15322507    | 7.3e-91  |
| ZmWRKY62   | GRMZM2G169149 | 801  | 266 | 2 | Chr7: 115548526 - 115549758  | 9.4e-173 |
| ZmWRKY66   | GRMZM2G024898 | 1518 | 505 | 2 | Chr2: 12799342 - 12803684    | 0.0e+00  |
| ZmWRKY67   | GRMZM2G057116 | 618  | 205 | 2 | Chr8: 88963901 - 88965293    | 5.2e-137 |
| ZmWRKY68-1 | GRMZM2G091331 | 951  | 316 | 2 | Chr10: 141270670 - 141272273 | 2.6e-203 |
| ZmWRKY68-2 | GRMZM2G071907 | 897  | 298 | 2 | Chr2: 11753531 - 11755126    | 1.0e-194 |
| ZmWRKY69   | GRMZM2G324999 | 1002 | 333 | 0 | Chr1: 216580897 - 216582541  | 4.1e-221 |
| ZmWRKY70   | GRMZM2G169966 | 1143 | 380 | 4 | Chr6: 153264614 - 153267678  | 3.9e-263 |
| ZmWRKY71   | GRMZM2G120320 | 1191 | 396 | 1 | Chr5: 92804729 - 92806565    | 1.4e-260 |
| ZmWRKY72-1 | GRMZM2G106560 | 663  | 220 | 1 | Chr2: 221753525 - 221758060  | 2.7e-146 |
| ZmWRKY72-2 | GRMZM2G054125 | 690  | 229 | 1 | Chr4: 17852745 - 17855630    | 2.8e-152 |
| ZmWRKY73   | GRMZM2G083350 | 1623 | 540 | 2 | Chr8: 19851097 - 19853367    | 0.0e+00  |
| ZmWRKY74-1 | GRMZM2G163418 | 996  | 331 | 2 | Chr2: 175752568 - 175755074  | 4.3e-224 |
| ZmWRKY74-2 | GRMZM2G061408 | 975  | 324 | 2 | Chr8: 109566616 - 109568284  | 2.9e-216 |
| ZmWRKY74-3 | GRMZM2G025895 | 975  | 324 | 2 | Chr7: 93164343 - 93166011    | 2.9e-216 |
| ZmWRKY74-4 | GRMZM2G139815 | 909  | 302 | 2 | Chr7: 92391794 - 92393825    | 1.4e-202 |
| ZmWRKY76-1 | GRMZM2G057011 | 1056 | 351 | 1 | Chr2: 180621363 - 180622626  | 1.4e-233 |
| ZmWRKY76-2 | GRMZM2G125653 | 909  | 302 | 2 | Chr7: 115308636 - 115310466  | 2.2e-197 |
| ZmWRKY77-1 | GRMZM2G137802 | 576  | 191 | 3 | Chr8: 136039539 - 136041895  | 1.0e-124 |
| ZmWRKY77-2 | GRMZM2G163054 | 588  | 195 | 2 | Chr6: 127590620 - 127591919  | 1.9e-98  |
| ZmWRKY78-1 | GRMZM2G130854 | 1833 | 610 | 5 | Chr2: 207841392 - 207847758  | 0.0e+00  |
| ZmWRKY78-2 | GRMZM2G398506 | 1842 | 613 | 5 | Chr7: 161289900 - 161300473  | 0.0e+00  |
| ZmWRKY79   | GRMZM2G127064 | 1230 | 409 | 2 | Chr6: 135702507 - 135705444  | 2.8e-271 |
| ZmWRKY80   | GRMZM2G151407 | 1752 | 583 | 5 | Chr7: 131286942 - 131290571  | 2.1e-220 |
| ZmWRKY81   | GRMZM2G461648 | 1125 | 374 | 1 | Chr4: 184676411 - 184677679  | 1.2e-255 |
| ZmWRKY82   | GRMZM2G549512 | 1701 | 566 | 3 | Chr4: 58331160 - 58349507    | 0.0e+00  |
| ZmWRKY83-1 | GRMZM2G173680 | 1104 | 367 | 3 | Chr3: 116024859 - 116027909  | 4.1e-243 |
| ZmWRKY83-2 | GRMZM2G130374 | 1125 | 367 | 2 | Chr1: 167896338 - 167898547  | 1.9e-250 |
| ZmWRKY83-3 | GRMZM2G070211 | 1065 | 354 | 3 | Chr1: 253502280 - 253505400  | 3.9e-237 |
| ZmWRKY84   | GRMZM2G425430 | 915  | 304 | 2 | Chr1: 75169610 - 75170840    | 1.3e-206 |

|            |               |      |     |   |                             |          |
|------------|---------------|------|-----|---|-----------------------------|----------|
| ZmWRKY85-1 | GRMZM2G143765 | 1491 | 496 | 3 | Chr6: 22907900 - 22912535   | 0.0e+00  |
| ZmWRKY85-2 | GRMZM2G076657 | 1485 | 494 | 3 | Chr3: 134915466 - 134922903 | 0.0e+00  |
| ZmWRKY86   | GRMZM2G158328 | 1002 | 333 | 2 | Chr3: 184849632 - 184852523 | 2.5e-221 |
| ZmWRKY87-1 | GRMZM2G018487 | 1194 | 397 | 3 | Chr1: 274880474 - 274884612 | 7.2e-265 |
| ZmWRKY87-2 | GRMZM2G147880 | 1188 | 395 | 3 | Chr5: 7868470 - 7872927     | 2.0e-261 |
| ZmWRKY88   | GRMZM2G083717 | 1143 | 380 | 2 | Chr1: 299282977 - 299288556 | 1.6e-259 |
| ZmWRKY90-1 | GRMZM2G400559 | 936  | 311 | 2 | Chr2: 151685379 - 151686596 | 1.4e-211 |
| ZmWRKY90-2 | GRMZM2G052671 | 1704 | 567 | 6 | Chr2: 189310197 - 189314231 | 0.0e+00  |
| ZmWRKY90-3 | GRMZM2G169564 | 1038 | 345 | 2 | Chr4: 184781651 - 184783303 | 1.3e-87  |
| ZmWRKY91   | GRMZM2G034421 | 687  | 228 | 2 | Chr8: 118969410 - 118971797 | 1.8e-150 |
| ZmWRKY92-1 | GRMZM2G149683 | 1050 | 349 | 2 | Chr8: 145230331 - 145231761 | 2.2e-234 |
| ZmWRKY92-2 | GRMZM5G823157 | 1455 | 484 | 2 | Chr5: 199646796 - 199650458 | 0.0e+00  |
| ZmWRKY93   | GRMZM2G003551 | 1191 | 396 | 2 | Chr9: 18101309 - 18104762   | 3.1e-264 |
| ZmWRKY97   | GRMZM2G176489 | 1644 | 547 | 2 | Chr3: 8217987 - 8220347     | 0.0e+00  |
| ZmWRKY102  | GRMZM2G151444 | 882  | 293 | 2 | Chr3: 9234113 - 9242047     | 7.4e-198 |
| ZmWRKY103  | GRMZM2G045560 | 1029 | 343 | 2 | Chr8: 168823637 - 168828313 | 2.0e-144 |
| ZmWRKY104  | GRMZM2G451035 | 918  | 305 | 2 | Chr4: 184661228 - 184662336 | 1.5e-209 |
| ZmWRKY105  | GRMZM2G171428 | 1494 | 497 | 3 | Chr9: 124229921 - 124236498 | 0.0e+00  |

## References

1. Lamesch, P. *et al.* The Arabidopsis Information Resource (TAIR): improved gene annotation and new tools. *Nucleic Acids Res.* **40**, D1202–10 (2012).
2. Ouyang, S. *et al.* The TIGR Rice Genome Annotation Resource: improvements and new features. *Nucleic Acids Res.* **35**, D883–7 (2007).
3. Goodstein, D. M. *et al.* Phytozome: a comparative platform for green plant genomics. *Nucleic Acids Res.* **40**, D1178–86 (2012).
4. Nordberg, H. *et al.* The genome portal of the Department of Energy Joint Genome Institute: 2014 updates. *Nucleic Acids Res.* **42**, D26–31 (2014).





|            |                  |        |        |        |        |        |        |        |        |         |
|------------|------------------|--------|--------|--------|--------|--------|--------|--------|--------|---------|
| GmWRKY11-1 | Glyma.06G077400  | 24.934 | 19.310 | 7.858  | 10.795 | 10.829 | 3.655  | 3.561  | 25.202 | 4.504   |
| GmWRKY11-2 | Glyma.04G076200  | 38.845 | 24.979 | 6.707  | 7.046  | 8.917  | 5.624  | 6.612  | 36.175 | 4.703   |
| GmWRKY11-3 | Glyma.17G057100  | 27.214 | 16.569 | 13.862 | 10.503 | 6.052  | 5.937  | 3.257  | 18.965 | 4.918   |
| GmWRKY11-4 | Glyma.13G102000  | 18.216 | 19.014 | 14.031 | 7.992  | 8.144  | 5.209  | 4.204  | 20.702 | 5.434   |
| GmWRKY11-5 | Glyma.09G061900  | 11.106 | 8.703  | 17.921 | 12.466 | 23.662 | 9.898  | 3.196  | 7.771  | 6.144   |
| GmWRKY11-6 | Glyma.15G168200  | 22.425 | 17.389 | 22.818 | 24.872 | 26.079 | 9.725  | 2.092  | 10.665 | 7.020   |
| GmWRKY11-7 | Glyma.14G135400  | 5.394  | 19.930 | 11.951 | 6.574  | 2.907  | 2.039  | 3.147  | 21.960 | 9.635   |
| GmWRKY11-8 | Glyma.17G197500  | 9.295  | 20.296 | 21.862 | 12.516 | 14.256 | 7.256  | 10.077 | 17.019 | 18.974  |
| GmWRKY13-1 | Glyma.06G147500  | 0.264  | 1.013  | 0.709  | 1.347  | 1.693  | 0.804  | 1.003  | 1.387  | 4.957   |
| GmWRKY13-2 | Glyma.04G218400  | 0.066  | 0.590  | 1.844  | 3.774  | 1.525  | 0.519  | 0.628  | 0.804  | ***     |
| GmWRKY13-3 | Glyma.08G143400  | 0.070  | 1.617  | 0.879  | 2.130  | 0.240  | 0.309  | 0.198  | 2.380  | 7.000   |
| GmWRKY13-4 | Glyma.05G185400  | 0      | 0      | 0      | 0      | 0      | 0      | 0      | 0      | 0       |
| GmWRKY14-1 | Glyma.15G135600  | 1.082  | 4.796  | 0.008  | 1.167  | 0.329  | 0.012  | 0.029  | 5.637  | 0.595   |
| GmWRKY14-2 | Glyma.09G029800  | 0.218  | 4.381  | 0.026  | 0.718  | 0.26   | 0.017  | 0.061  | 5.760  | 1.421   |
| GmWRKY15-1 | Glyma.05G096500  | 12.552 | 18.815 | 47.960 | 21.294 | 12.119 | 4.440  | 3.519  | 17.912 | 12.6006 |
| GmWRKY15-2 | Glyma.17G168900  | 17.894 | 19.667 | 39.365 | 24.886 | 31.530 | 5.464  | 3.539  | 18.552 | 10.305  |
| GmWRKY15-3 | Glyma.01G189100  | 6.244  | 8.360  | 5.248  | 7.644  | 10.277 | 2.928  | 4.327  | 8.962  | 8.133   |
| GmWRKY15-4 | Glyma.11G053100  | 4.636  | 4.453  | 3.615  | 7.692  | 9.597  | 3.637  | 0.983  | 3.736  | 8.462   |
| GmWRKY18   | Glyma.10G113800  | 0      | 0.210  | 0.131  | 1.432  | 5.17   | 0.271  | 0      | 0.123  | 0.250   |
| GmWRKY20-1 | Glyma.18G081200  | 2.940  | 3.178  | 2.577  | 4.282  | 0.888  | 4.519  | 2.716  | 2.999  | 3.852   |
| GmWRKY20-2 | Glyma.08G325800  | 4.922  | 7.145  | 5.155  | 1.489  | 8.839  | 6.441  | 5.093  | 5.969  | 4.458   |
| GmWRKY20-3 | Glyma.06G2242200 |        |        |        |        |        |        |        |        |         |
| GmWRKY20-4 | Glyma.02G297400  | 5.748  | 5.098  | 2.346  | 5.422  | 0.923  | 3.938  | 4.689  | 3.710  | 4.893   |
| GmWRKY20-5 | Glyma.14G016200  | 1.639  | 7.049  | 7.566  | 9.558  | 1.952  | 6.730  | 4.130  | 6.739  | 7.430   |
| GmWRKY21-1 | Glyma.03G159700  | 0.462  | 0.705  | 0.496  | 0.384  | 0.254  | 1.101  | ****   | 1.049  | 1.045   |
| GmWRKY21-2 | Glyma.10G032900  | 2.919  | 6.311  | 6.446  | 15.912 | 7.046  | ****   | 11.200 | 5.047  | 12.305  |
| GmWRKY21-3 | Glyma.02G141000  | 4.482  | 8.565  | 18.932 | 47.276 | 36.608 | ****   | 31.762 | 13.682 | 18.442  |
| GmWRKY22-1 | Glyma.16G031900  | 12.020 | 2.094  | 1.585  | 0.963  | 16.380 | 0.241  | 0.577  | 2.443  | 0.768   |
| GmWRKY22-2 | Glyma.09G254800  | 11.254 | 3.777  | 3.833  | 3.111  | 2.832  | 1.175  | 2.143  | 3.918  | 2.172   |
| GmWRKY22-3 | Glyma.18G238200  | 24.601 | 3.595  | 7.939  | 4.965  | 2.345  | 1.444  | 1.715  | 4.179  | 3.379   |
| GmWRKY23-1 | Glyma.02G010900  | 5.435  | 8.800  | 10.018 | 11.025 | 14.490 | 2.998  | 0.280  | 18.424 | 3.171   |
| GmWRKY23-2 | Glyma.10G011300  | 4.326  | 5.582  | 11.089 | 14.324 | 7.169  | 5.954  | 2.046  | ****   | 5.904   |
| GmWRKY23-3 | Glyma.19G217800  | 4.186  | 1.202  | 3.119  | 0.940  | 3.905  | 2.653  | 3.382  | 1.290  | 0.597   |
| GmWRKY23-4 | Glyma.03G220800  | 21.360 | 6.907  | 10.350 | 8.666  | 21.210 | 10.417 | 3.279  | 12.449 | 3.690   |

|             |                 |        |        |        |        |        |       |       |        |        |
|-------------|-----------------|--------|--------|--------|--------|--------|-------|-------|--------|--------|
| GmWRKY23-5  | Glyma.07G238000 | 0.673  | 1.087  | 0.503  | 1.335  | 0.909  | 0.275 | 0.189 | 1.361  | 0.219  |
| GmWRKY26-1  | Glyma.11G163300 | 22.526 | 6.408  | 27.415 | 0.589  | 15.298 | 0.124 | 0.256 | 7.406  | 0.178  |
| GmWRKY26-2  | Glyma.02G232600 | 31.105 | 11.734 | 80.957 | 3.869  | 67.456 | 1.268 | 0.254 | 12.355 | 2.755  |
| GmWRKY26-3  | Glyma.14G200200 | 22.057 | 9.232  | 72.911 | 4.009  | 51.836 | 1.592 | 0.688 | 7.450  | 2.556  |
| GmWRKY27-1  | Glyma.16G177000 | 0.923  | 0.316  | 0.248  | 0.053  | 0.085  | 0.233 | 0.071 | 0.303  | 0.055  |
| GmWRKY27-2  | Glyma.16G176700 |        |        |        |        |        |       |       |        |        |
| GmWRKY27-3  | Glyma.20G163200 | 0.845  | 1.208  | 1.036  | 0.903  | 0.214  | 0.059 | 0.042 | 1.401  | 0.168  |
| GmWRKY27-4  | Glyma.10G230200 | 0.238  | 0.468  | 0.200  | 0.167  | 0.059  | 0.038 | 0.012 | 0.212  | 0.028  |
| GmWRKY29-1  | Glyma.11G021200 | 0.283  | 0      | 0.107  | 0.020  | 0      | 0     | 0     | 0.042  | 0      |
| GmWRKY29-2  | Glyma.08G018300 | 8.979  | 1.029  | 4.637  | 0.505  | 3.301  | 0.814 | 0.030 | 1.763  | 0.971  |
| GmWRKY30-1  | Glyma.06G125600 | 0.719  | 0.350  | 9.889  | 0.012  | 0.423  | 0.040 | 0     | 0.558  | 0.036  |
| GmWRKY30-2  | Glyma.04G238300 | 0.068  | 0.104  | 3.597  | 0.023  | 0.093  | 0.006 | 0.010 | 0.036  | 0      |
| GmWRKY32-1  | Glyma.12G152600 | 2.950  | 3.383  | 5.081  | 4.817  | 3.794  | 4.776 | ****  | 3.835  | 5.529  |
| GmWRKY32-2  | Glyma.17G074000 | 4.567  | 4.449  | 5.329  | 7.376  | 6.120  | 5.522 | ****  | 5.617  | 6.219  |
| GmWRKY32-3  | Glyma.02G203800 | 3.447  | 8.510  | 9.890  | 10.742 | 8.064  | 9.191 | ****  | 9.471  | 11.858 |
| GmWRKY33-1  | Glyma.01G128100 | 4.567  | 0.631  | 15.595 | 0.137  | 0.551  | 0.045 | 0.551 | 0.529  | 0.285  |
| GmWRKY33-2  | Glyma.09G280200 | ****   | 1.564  | 7.791  | 0.597  | 3.748  | 0.044 | 0.109 | ****   | 0.291  |
| GmWRKY33-3  | Glyma.18G208800 | ****   | 1.313  | 8.042  | 0.276  | 3.48   | 0.067 | 0.084 | 0.597  | 0.646  |
| GmWRKY35-1  | Glyma.08G078700 | ****   | 0.200  | 0.148  | 0.224  | 0.791  | 0.019 | 0.010 | 2.075  | 0.427  |
| GmWRKY35-2  | Glyma.05G123600 | ****   | 1.956  | 0.712  | 0.387  | 1.383  | 0.014 | 0.094 | 1.923  | 0.439  |
| GmWRKY35-3  | Glyma.03G220100 | 3.854  | 4.620  | 13.297 | 13.521 | 15.324 | 4.793 | 0.994 | 8.035  | 11.878 |
| GmWRKY35-4  | Glyma.19G217000 | 1.222  | 2.560  | 3.972  | 2.285  | 2.562  | 4.001 | 0.049 | 7.968  | 4.900  |
| GmWRKY40-1  | Glyma.14G102900 | 0.094  | 0.058  | *****  | 0.064  | 1.897  | 0.167 | 0     | 0.066  | 0.320  |
| GmWRKY40-2  | Glyma.17G222500 | 0.137  | 0.094  | 1.730  | 1.349  | 1.381  | 0.425 | 0     | 0.307  | 1.515  |
| GmWRKY40-3  | Glyma06g06530   |        |        |        |        |        |       |       |        |        |
| GmWRKY40-4  | Glyma.04G061400 | 0.712  | 0.219  | 4.250  | 0.058  | 0.112  | 0     | 0     | 0.236  | 0      |
| GmWRKY40-5  | Glyma.08G218600 | 3.547  | 1.877  | 16.461 | 0.759  | 4.719  | 0.285 | 0.921 | 4.147  | 0.048  |
| GmWRKY40-6  | Glyma.07G023300 | 2.090  | 1.444  | 27.883 | 0.655  | 10.670 | 0.045 | 0.325 | 2.533  | 0.182  |
| GmWRKY40-7  | Glyma.13G370100 | 2.146  | 0.366  | 10.267 | 0.211  | 4.934  | 1.137 | 3.078 | 0.339  | 2.433  |
| GmWRKY40-8  | Glyma.15G003300 | 12.795 | 3.064  | 27.064 | 1.683  | 12.293 | 1.844 | 0.501 | 3.748  | 0.829  |
| GmWRKY40-9  | Glyma.14G103100 | 2.181  | 0.902  | ****   | 0.094  | 3.219  | 0.251 | 0     | 0.792  | 0.132  |
| GmWRKY40-10 | Glyma.17G222300 | 0.869  | 0.482  | 4.179  | 0.088  | 0.840  | 0.890 | 0     | 0.208  | 0.720  |
| GmWRKY41-1  | Glyma.08G021900 | 1.364  | 0.666  | 37.304 | 1.727  | 7.809  | 0.160 | 0     | 0.533  | 0.636  |
| GmWRKY41-2  | Glyma.01G224800 | 6.124  | 3.699  | 32.819 | 0.247  | 0.826  | 0.089 | 0.022 | 1.484  | 0.124  |

|            |                 |         |        |        |       |        |        |       |        |       |
|------------|-----------------|---------|--------|--------|-------|--------|--------|-------|--------|-------|
| GmWRKY41-3 | Glyma.05G215900 | 5.900   | 2.871  | 72.788 | 2.229 | 4.983  | 0.853  | 0.010 | 2.178  | 0.426 |
| GmWRKY41-4 | Glyma.19G254800 | 0.917   | 0.718  | ****   | 1.756 | 6.286  | 0.914  | 0.782 | 0.619  | 1.110 |
| GmWRKY41-5 | Glyma.03G256700 | 2.359   | 1.351  | 15.234 | 1.788 | 2.39   | 1.072  | 0.743 | 1.672  | 2.360 |
| GmWRKY41-6 | Glyma.16G026400 | 2.005   | 1.980  | ****   | 2.309 | 4.302  | 1.905  | 0.507 | 0.680  | 4.402 |
| GmWRKY41-7 | Glyma.07G057400 | 12.204  | 3.527  | 44.517 | 2.200 | 3.021  | 1.715  | 0.234 | 3.082  | 7.275 |
| GmWRKY42   | Glyma.15G186300 | 4.219   | 2.233  | 0.793  | 0.060 | 0.116  | 0.013  | 0.011 | 2.939  | 0.012 |
| GmWRKY44-1 | Glyma.03G176600 | 3.788   | 1.543  | 0.030  | 2.186 | 1.081  | 6.777  | 6.912 | 1.204  | 3.755 |
| GmWRKY44-2 | Glyma.19G177400 | 0.510   | 0.397  | 0.116  | 1.019 | 5.689  | 17.882 | 9.595 | 0.078  | 2.236 |
| GmWRKY47-1 | Glyma.02G007500 | *****   | 0.660  | 0      | 0.173 | 0.080  | 0.570  | 0     | 0.839  | 0.198 |
| GmWRKY47-2 | Glyma.03G224700 | *****   | 6.393  | 4.763  | 0.284 | 1.918  | 7.240  | 0.145 | 6.284  | 0.974 |
| GmWRKY47-3 | Glyma.19G221700 | *****   | 2.652  | 1.856  | 0.447 | 0.425  | 0.589  | 0.197 | 2.209  | 0.567 |
| GmWRKY48-1 | Glyma.15G139000 | 0.678   | 0.310  | 1.550  | 0.966 | 0.256  | 0.355  | 0.096 | 0.254  | ***** |
| GmWRKY48-2 | Glyma.09G034300 | 0.202   | 0.141  | 0.145  | 1.948 | 1.326  | ****   | 0.273 | 0.202  | 1.163 |
| GmWRKY49   | Glyma.14G199800 | 2.624   | 0.905  | 1.409  | 2.760 | 2.936  | 1.458  | 1.564 | 1.461  | 1.058 |
| GmWRKY50-1 | Glyma.04G054200 | 0       | 0.338  | ****   | 0.021 | 0.326  | 0.129  | 0     | 0.022  | 0     |
| GmWRKY50-2 | Glyma.06G054500 | 0       | 0.042  | 0      | 0     | 0      | 0      | 0     | 0      | 0     |
| GmWRKY51-1 | Glyma.06G147100 | 0.083   | 0.945  | ****   | 0.214 | 0.991  | 0.071  | 0     | 2.013  | 0.127 |
| GmWRKY51-2 | Glyma.04G218700 | 0.094   | 0.107  | ****   | 0.024 | 1.895  | 0.013  | 0     | 0.050  | 0.024 |
| GmWRKY51-3 | Glyma.08G142400 | 7.102   | 6.607  | ****   | 2.082 | 13.941 | 2.739  | 0.110 | 3.325  | 0.621 |
| GmWRKY51-4 | Glyma.05G184500 | 4.607   | 3.793  | ****   | 0.599 | 3.262  | 0.468  | 0.022 | 3.440  | 0.630 |
| GmWRKY54-1 | Glyma.14G186000 | 0       | 0      | 0.213  | 0.346 | 2.195  | ****   | 0     | 0      | 0.020 |
| GmWRKY54-2 | Glyma.14G186100 | 0.124   | 0      | 0.133  | 0.260 | 0.048  | 0.260  | 0     | 0.022  | 0.260 |
| GmWRKY55-1 | Glyma.06G142100 | 0.287   | 0.128  | ****   | 0     | 0.009  | 0.016  | 0     | 0.137  | 0.015 |
| GmWRKY55-2 | Glyma.04G223200 | 0.024   | 0.033  | 1.874  | 0.025 | 0.057  | 0      | 0     | 0.052  | 0     |
| GmWRKY55-3 | Glyma.05G165800 | 0.709   | 0.516  | ****   | 2.098 | 1.785  | 1.563  | 1.747 | 1.120  | 1.852 |
| GmWRKY56-1 | Glyma.16G031400 | 0.567   | ****   | 0      | 0.430 | 0.434  | 0      | 0     | 0.744  | 0     |
| GmWRKY56-2 | Glyma.09G254400 | 2.909   | 2.351  | 0.023  | 0.699 | 0.339  | 0.012  | 0     | 2.376  | 0     |
| GmWRKY56-3 | Glyma.18G238600 | 1.143   | 1.176  | 0      | 0.350 | 0.287  | 0.051  | 0     | 0.891  | 0     |
| GmWRKY57-1 | Glyma.02G115200 | ****    | 6.655  | 5.936  | 4.655 | 6.927  | 3.632  | 0.830 | 9.706  | 0.469 |
| GmWRKY57-2 | Glyma.01G056800 | 1.856   | 2.714  | 4.168  | 6.934 | 1.093  | 5.082  | 0.271 | 0      | 0.975 |
| GmWRKY65-1 | Glyma.08G118200 | 105.342 | 35.199 | 3.432  | 0.461 | 0.843  | 0.607  | 0.412 | 39.186 | 0.655 |
| GmWRKY65-2 | Glyma.05G160800 | ****    | 21.478 | 16.324 | 0.856 | 0.895  | 1.325  | 1.452 | 25.525 | 0.560 |
| GmWRKY67   | Glyma.03G002300 | 0.974   | 0.788  | 0.165  | 0     | 0      | 0.017  | 0     | 0.486  | 0     |
| GmWRKY69-1 | Glyma.13G289400 | ****    | 15.301 | 11.764 | 4.415 | 11.662 | 1.519  | 0.941 | 17.523 | 1.047 |

|            |                 |        |        |        |        |        |        |       |        |        |
|------------|-----------------|--------|--------|--------|--------|--------|--------|-------|--------|--------|
| GmWRKY69-2 | Glyma.12G212300 | ****   | 8.590  | 14.376 | 3.244  | 8.011  | 1.536  | 0.542 | 8.642  | 0.816  |
| GmWRKY70-1 | Glyma.06G142000 | 14.003 | 3.271  | ****   | 1.701  | 3.014  | 1.208  | 0     | 3.348  | 5.414  |
| GmWRKY70-2 | Glyma.04G223300 | 10.994 | 2.424  | ****   | 3.616  | 3.010  | 2.246  | 0     | 2.248  | 12.887 |
| GmWRKY70-3 | Glyma.13G267500 | ****   | 0.844  | 0      | 0      | 0.015  | 0      | 0     | 2.020  | 0.046  |
| GmWRKY70-4 | Glyma.13G267600 | 0.202  | 0.091  | 0.109  | 0      | 0      | 0      | 0     | 0.297  | 0      |
| GmWRKY70-5 | Glyma.13G267700 | 0.737  | 0.463  | 0.043  | 0.063  | 0.013  | 0.127  | 0     | 1.037  | 0.021  |
| GmWRKY70-6 | Glyma.18G213200 | 12.520 | 14.208 | ****   | 7.469  | 61.053 | 4.574  | 0     | 9.891  | 16.468 |
| GmWRKY70-7 | Glyma.09G274000 | 1.274  | 13.618 | ****   | 17.662 | 63.153 | 23.080 | 0.230 | 13.878 | 35.173 |
| GmWRKY71-1 | Glyma.05G127600 | 1.698  | 2.059  | 4.683  | 0.777  | 1.577  | 0.339  | 0     | 2.925  | 4.088  |
| GmWRKY71-2 | Glyma.02G285900 | ****   | 1.638  | 0.442  | 1.802  | 4.982  | 0.637  | 0.024 | 3.740  | 2.077  |
| GmWRKY71-3 | Glyma.14G028900 | 11.267 | 1.363  | 0.669  | 3.804  | 7.746  | 1.800  | 0.667 | 2.867  | 3.804  |
| GmWRKY72-1 | Glyma.02G020300 | ****   | 0.075  | 0.012  | 0.011  | 0.006  | 0      | 0     | 1.517  | 0.075  |
| GmWRKY72-2 | Glyma.01G043300 | ****   | 0.174  | 0.012  | 0      | 0      | 0      | 0     | 1.944  | 0      |
| GmWRKY72-3 | Glyma.19G020600 | 29.001 | 4.910  | 0.051  | 0.024  | 0.160  | 0.339  | 0     | 14.498 | 0.466  |
| GmWRKY72-4 | Glyma.09G240000 | 2.946  | 0.399  | 0.009  | 0      | 0      | 0      | 0     | 7.005  | 0      |
| GmWRKY72-5 | Glyma.06G190800 | 3.422  | 1.771  | 4.871  | 0      | 0.068  | 0.039  | 0     | 1.539  | 0.044  |
| GmWRKY72-6 | Glyma.05G029000 | 5.345  | 3.643  | 1.801  | 0      | 0.037  | 0      | 0     | 3.099  | 0      |
| GmWRKY75-1 | Glyma.08G011300 | 0.118  | 0.161  | 7.643  | 0.213  | 0.189  | 0.133  | 0.621 | 0.156  | 0.060  |
| GmWRKY75-2 | Glyma.19G094100 | 7.910  | 1.782  | 17.779 | 0.636  | 46.028 | 1.538  | 0.064 | 3.081  | 1.493  |
| GmWRKY75-3 | Glyma.16G054400 | 11.090 | 1.889  | 6.339  | 0.682  | 3.741  | 0.400  | 0     | 2.684  | 1.148  |

*Phaseolus vulgaris*

|                    |                         | Young<br>Trifoliates | Leaves   | Flowers      | Flower<br>buds | Young<br>Pods | Stems_<br>10 | Stems_<br>19 | Roots_<br>10 | Roots_<br>19  | Nodules       |
|--------------------|-------------------------|----------------------|----------|--------------|----------------|---------------|--------------|--------------|--------------|---------------|---------------|
| PvulWRKY1-1        | Phvul.008G286100        | 9.252                | 9.045    | 9.436        | 6.845          | 7.967         | 5.765        | 8.569        | 14.380       | 18.247        | 19.422        |
| PvulWRKY1-2        | Phvul.008G270500        | 0.151                | 0        | 0.318        | 0.089          | 0.044         | 0            | 0.097        | 0.027        | 0.154         | 0.037         |
| PvulWRKY1-3        | Phvul.005G116000        | 2.086                | 1.243    | 1.249        | 0.567          | 1.204         | 4.299        | 3.701        | 13.254       | 9.570         | 5.510         |
| PvulWRKY1-4        | Phvul.011G101900        | 1.947                | 1.845    | 3.814        | 8.801          | 0.868         | 0.573        | 1.171        | 1.721        | 1.697         | 1.212         |
| PvulWRKY1-5        | Phvul.006G147800        | 5.640                | 3.980    | 35.715       | 2.336          | 11.086        | 5.769        | 4.996        | 30.353       | 39.480        | 29.518        |
| PvulWRKY1-6        | Phvul.006G047300        | 0.052                | 0.419    | 0.226        | 0.0780         | 0.037         | 0.321        | 0.190        | 5.599        | 4.205         | 1.984         |
| PvulWRKY2          | Phvul.008G054100        | 1.561                | 1.728    | 0.658        | 0.846          | 1.225         | 2.243        | 2.302        | 1.489        | 1.318         | 1.736         |
| PvulWRKY3          | Phvul.002G103400        | 5.245                | 11.979   | 6.520        | 1.907          | 1.293         | 2.691        | 2.078        | 11.98        | 8.041         | 4.142         |
| PvulWRKY4          | Phvul.002G091100        | 8.280                | 9.465    | 6.719        | 8.912          | 6.444         | 4.656        | 5.637        | 15.341       | 11.156        | 6.411         |
| PvulWRKY5-1        | Phvul.003G124000        | 0.446                | 0        | 0.235        | 0              | 0.080         | 0            | 0.211        | 0.069        | 0.155         | 0.157         |
| PvulWRKY5-2        | Phvul.009G220700        | 0.496                | 2.482    | 0.124        | 0.139          | 0.180         | 0.208        | 0.453        | 7.012        | 8.621         | 4.665         |
| PvulWRKY5-3        | Phvul.008G048100        | 0.529                | 0.499    | 0.325        | 0              | 0.484         | 9.359        | 16.859       | 0.407        | 1.360         | 0.371         |
| PvulWRKY7          | Phvul.001G213600        | 14.371               | 19.048   | 24.284       | 7.148          | 7.002         | 16.799       | 12.470       | 29.690       | 21.775        | 12.858        |
| PvulWRKY9-1        | Phvul.002G202500        | 1.751                | 1.052    | 0.283        | 1.104          | 0.391         | 0.124        | 0.349        | 4.926        | 2.941         | 2.199         |
| <b>PvulWRKY9-2</b> | <b>Phvul.008G043000</b> | <b>0</b>             | <b>0</b> | <b>0.035</b> | <b>0</b>       | <b>0</b>      | <b>0</b>     | <b>0</b>     | <b>8.728</b> | <b>15.118</b> | <b>48.761</b> |
| PvulWRKY11-1       | Phvul.009G233900        | 11.660               | 8.298    | 34.141       | 13.189         | 24.192        | 58.075       | 42.105       | 26.672       | 52.750        | 36.555        |
| PvulWRKY11-2       | Phvul.003G139500        | 21.790               | 25.292   | 47.243       | 50.119         | 29.453        | 59.685       | 49.450       | 118.27       | 134.816       | 79.023        |
| PvulWRKY11-3       | Phvul.009G101900        | 6.223                | 4.460    | 7.366        | 3.787          | 7.057         | 10.617       | 12.083       | 55.647       | 42.011        | 39.200        |
| PvulWRKY13-1       | Phvul.009G138600        | 1.286                | 1.210    | 2.057        | 1.501          | 1.511         | 5.186        | 7.236        | 1.289        | 7.236         | 1.112         |
| PvulWRKY13-2       | Phvul.002G266400        | 0.984                | 0.759    | 1.053        | 1.014          | 4.036         | 4.905        | 9.200        | 1.068        | 2.084         | 0.686         |
| PvulWRKY14         | Phvul.006G123000        | 0.015                | 0        | 2.951        | 2.773          | 0.429         | 1.757        | 2.233        | 14.661       | 6.906         | 3.885         |
| PvulWRKY15-1       | Phvul.002G016100        | 18.590               | 7.058    | 12.420       | 13.027         | 25.399        | 33.747       | 33.331       | 24.014       | 29.599        | 19.726        |
| PvulWRKY15-2       | Phvul.003G240900        | 24.308               | 13.538   | 49.015       | 8.077          | 41.848        | 45.011       | 33.948       | 50.566       | 40.304        | 22.438        |
| PvulWRKY17         | Phvul.001G060200        | 37.519               | 14.965   | 66.844       | 46.894         | 58.155        | 61.321       | 59.206       | 82.313       | 68.979        | 31.322        |
| PvulWRKY19-1       | Phvul.008G081800        | 24.328               | 16.433   | 78.755       | 23.965         | 38.820        | 16.646       | 31.687       | 2.498        | 7.812         | 5.340         |

|              |                  |        |        |        |        |        |        |        |        |        |        |
|--------------|------------------|--------|--------|--------|--------|--------|--------|--------|--------|--------|--------|
| PvulWRKY19-2 | Phvul.010G057900 | 1.036  | 0      | 0.775  | 0.565  | 0.363  | 0.383  | 3.340  | 0.255  | 0.283  | 0.336  |
| PvulWRKY18   | Phvul.009G087400 | 0.625  | 0.049  | 4.272  | 0.391  | 1.986  | 0.351  | 0.466  | 0.605  | 1.481  | 0.804  |
| PvulWRKY20-1 | Phvul.008G275300 | 12.309 | 11.580 | 3.236  | 4.211  | 5.947  | 8.457  | 12.566 | 9.648  | 13.512 | 8.168  |
| PvulWRKY20-2 | Phvul.006G053300 | 8.539  | 8.068  | 6.237  | 5.396  | 7.703  | 13.851 | 15.365 | 12.748 | 12.920 | 9.322  |
| PvulWRKY21   | Phvul.007G177900 | 11.453 | 10.762 | 16.279 | 7.975  | 20.533 | 25.918 | 30.637 | 18.302 | 23.445 | 10.298 |
| PvulWRKY22-1 | Phvul.010G104200 | 0.373  | 0.334  | 0.024  | 0.131  | 0.226  | 0.740  | 0.586  | 2.530  | 2.137  | 0.477  |
| PvulWRKY22-2 | Phvul.008G058300 | 4.873  | 3.911  | 7.905  | 7.629  | 10.299 | 11.860 | 14.664 | 13.807 | 18.148 | 6.667  |
| PvulWRKY23-1 | Phvul.007G212900 | 6.732  | 19.076 | 37.831 | 8.541  | 25.214 | 13.379 | 15.331 | 10.812 | 24.161 | 24.955 |
| PvulWRKY23-2 | Phvul.001G214400 | 2.785  | 1.006  | 12.746 | 1.259  | 14.023 | 2.097  | 3.127  | 5.000  | 7.483  | 21.158 |
| PvulWRKY26-1 | Phvul.008G251300 | 13.673 | 25.724 | 76.970 | 5.563  | 22.151 | 19.168 | 14.650 | 31.800 | 44.872 | 27.493 |
| PvulWRKY26-2 | Phvul.006G074600 | 0.090  | 0.030  | 4.098  | 0.602  | 1.149  | 0.214  | 0.291  | 1.346  | 7.173  | 5.947  |
| PvulWRKY27-1 | Phvul.004G105800 | 0      | 0.132  | 0.026  | 0.043  | 0.049  | 0.496  | 0.209  | 2.798  | 0.855  | 0.956  |
| PvulWRKY27-2 | Phvul.007G075400 | 0.773  | 2.191  | 0.953  | 1.525  | 1.739  | 4.015  | 2.247  | 4.904  | 3.037  | 2.140  |
| PvulWRKY28   | Phvul.001G042100 | 1.881  | 0.191  | 7.982  | 1.709  | 1.616  | 0.206  | 6.328  | 0.137  | 1.029  | 3.722  |
| PvulWRKY29-1 | Phvul.002G160100 | 0      | 0      | 0.383  | 0      | 1.091  | 0      | 0      | 0      | 0      | 0      |
| PvulWRKY29-2 | Phvul.002G293200 | 2.540  | 1.077  | 0.740  | 0.206  | 0.568  | 0.132  | 0.858  | 6.351  | 7.557  | 4.118  |
| PvulWRKY32-1 | Phvul.003G156300 | 10.843 | 6.257  | 9.099  | 7.352  | 18.647 | 17.133 | 21.690 | 14.537 | 13.683 | 8.762  |
| PvulWRKY32-2 | Phvul.009G195200 | 1.232  | 0.433  | 1.551  | 1.723  | 3.634  | 2.314  | 3.616  | 2.314  | 2.073  | 0.557  |
| PvulWRKY33-1 | Phvul.010G062500 | 0.456  | 0.054  | 0.321  | 0.063  | 0.135  | 0.028  | 0.137  | 0.376  | 3.133  | 1.964  |
| PvulWRKY33-2 | Phvul.008G090300 | 2.291  | 0.653  | 8.266  | 1.228  | 7.966  | 2.338  | 2.483  | 6.432  | 2.483  | 8.648  |
| PvulWRKY33-3 | Phvul.008G251700 | 1.203  | 0.633  | 1.474  | 0.707  | 0.743  | 0.485  | 0.928  | 0.626  | 0.928  | 0.593  |
| PvulWRKY33-4 | Phvul.008G251800 | 1.323  | 1.150  | 1.114  | 1.352  | 1.141  | 1.716  | 1.268  | 2.017  | 2.658  | 3.180  |
| PvulWRKY34   | Phvul.005G005800 | 10.543 | 18.7   | 9.276  | 4.281  | 9.776  | 15.288 | 14.963 | 12.995 | 17.563 | 9.053  |
| PvulWRKY35   | Phvul.002G202000 | 0      | 0      | 0.702  | 1.269  | 0.402  | 1.662  | 1.694  | 2.831  | 2.336  | 2.590  |
| PvulWRKY40-1 | Phvul.005G181800 | 3.510  | 1.450  | 15.359 | 6.014  | 3.403  | 3.169  | 5.093  | 6.442  | 19.924 | 9.181  |
| PvulWRKY40-2 | Phvul.010G161100 | 2.268  | 0.182  | 7.485  | 1.687  | 3.108  | 0.866  | 2.420  | 2.539  | 6.169  | 4.152  |
| PvulWRKY43-1 | Phvul.010G104700 | 0      | 0      | 0.263  | 0      | 0.354  | 0.096  | 0.390  | 1.408  | 2.232  | 1.765  |
| PvulWRKY43-2 | Phvul.008G058000 | 0.131  | 0.495  | 0.105  | 0      | 0.110  | 0      | 0.263  | 1.065  | 3.232  | 1.931  |
| PvulWRKY44   | Phvul.001G173700 | 5.855  | 2.206  | 17.610 | 19.068 | 13.720 | 2.122  | 3.545  | 0.579  | 0.461  | 0.615  |
| PvulWRKY45-1 | Phvul.008G185800 | 2.802  | 0.070  | 8.899  | 5.160  | 7.610  | 0.069  | 0.375  | 0      | 0      | 0      |
| PvulWRKY45-2 | Phvul.008G185700 | 2.015  | 0.075  | 1.181  | 0.742  | 5.393  | 0.307  | 0.679  | 0      | 0      | 0      |
| PvulWRKY45-3 | Phvul.009G043100 | 10.774 | 2.145  | 8.912  | 8.229  | 10.296 | 1.913  | 9.435  | 1.040  | 2.278  | 1.850  |
| PvulWRKY46-1 | Phvul.006G111700 | 2.231  | 2.157  | 10.648 | 2.256  | 2.488  | 1.910  | 2.786  | 0.819  | 4.546  | 2.844  |
| PvulWRKY46-2 | Phvul.010G111900 | 7.074  | 12.286 | 5.549  | 4.205  | 5.973  | 4.610  | 8.227  | 5.557  | 16.908 | 11.148 |

|              |                  |        |        |        |        |        |        |        |        |        |        |
|--------------|------------------|--------|--------|--------|--------|--------|--------|--------|--------|--------|--------|
| PvulWRKY47-1 | Phvul.001G218500 | 7.537  | 2.307  | 17.958 | 4.058  | 3.476  | 2.023  | 3.232  | 14.132 | 13.676 | 7.112  |
| PvulWRKY47-2 | Phvul.007G209000 | 0      | 0      | 0.508  | 0.130  | 0.795  | 0.079  | 0      | 0.582  | 4.016  | 9.313  |
| PvulWRKY48-1 | Phvul.003G116300 | 1.052  | 0.213  | 6.642  | 0.938  | 0.967  | 4.263  | 4.065  | 2.420  | 6.170  | 6.174  |
| PvulWRKY48-2 | Phvul.006G119100 | 0.929  | 0.296  | 1.678  | 1.745  | 1.850  | 1.137  | 2.829  | 0.586  | 2.138  | 2.707  |
| PvulWRKY49   | Phvul.008G119400 | 1.251  | 0.156  | 0.358  | 2.289  | 0.443  | 0.214  | 0.288  | 2.424  | 0.770  | 0.943  |
| PvulWRKY50   | Phvul.002G265400 | 1.662  | 0.947  | 9.834  | 2.798  | 3.569  | 0.905  | 2.859  | 5.044  | 7.523  | 12.968 |
| PvulWRKY51-1 | Phvul.009G080000 | 0      | 0      | 0.047  | 0      | 0      | 0      | 0      | 0.444  | 0.302  | 0.072  |
| PvulWRKY51-2 | Phvul.001G039900 | 0.489  | 0.333  | 1.346  | 1.489  | 2.655  | 0.340  | 2.191  | 0.077  | 1.067  | 0.757  |
| PvulWRKY58   | Phvul.008G039900 | 15.678 | 18.863 | 50.788 | 12.467 | 20.225 | 16.703 | 14.476 | 19.028 | 18.364 | 13.387 |
| PvulWRKY59-1 | Phvul.007G118200 | 0      | 0      | 0      | 0      | 0      | 0      | 0      | 0      | 0      | 0      |
| PvulWRKY59-2 | Phvul.007G118100 | 0      | 0      | 0      | 0      | 0.180  | 0      | 0      | 0      | 0      | 0      |
| PvulWRKY60   | Phvul.001G042200 | 1.505  | 0.051  | 4.215  | 3.181  | 2.596  | 0.220  | 2.535  | 0.267  | 0.761  | 1.602  |
| PvulWRKY65   | Phvul.002G240900 | 0.978  | 1.286  | 2.192  | 0.919  | 1.014  | 5.706  | 1.641  | 53.960 | 32.464 | 17.091 |
| PvulWRKY68   | Phvul.009G138900 | 3.205  | 2.975  | 5.550  | 2.761  | 3.452  | 6.880  | 6.986  | 3.949  | 6.729  | 2.009  |
| PvulWRKY69-1 | Phvul.002G163400 | 0      | 0      | 0      | 0      | 0      | 0      | 0      | 0      | 0      | 0      |
| PvulWRKY69-2 | Phvul.002G297100 | 1.057  | 0.448  | 1.664  | 0.833  | 0.966  | 0.825  | 0.830  | 0.353  | 10.213 | 5.312  |
| PvulWRKY69-3 | Phvul.009G137500 | 0.484  | 0.928  | 0.608  | 0.088  | 0.224  | 0.248  | 0.518  | 0      | 1.349  | 1.046  |
| PvulWRKY69-3 | Phvul.005G093800 | 5.275  | 8.093  | 29.935 | 13.251 | 6.612  | 13.090 | 6.201  | 83.881 | 56.929 | 45.336 |
| PvulWRKY71-1 | Phvul.002G196800 | 11.706 | 0.865  | 3.826  | 0.705  | 2.911  | 2.264  | 5.378  | 0.614  | 1.772  | 2.247  |
| PvulWRKY71-2 | Phvul.008G192800 | 9.345  | 1.303  | 4.534  | 0.518  | 2.034  | 2.863  | 4.888  | 1.291  | 6.155  | 6.753  |
| PvulWRKY73-1 | Phvul.003G192000 | 0.034  | 0      | 0.414  | 0.051  | 0.125  | 0.071  | 0.027  | 24.059 | 20.516 | 5.466  |
| PvulWRKY73-2 | Phvul.009G189700 | 0      | 0      | 0      | 0.030  | 0      | 0.117  | 0      | 9.662  | 5.447  | 1.987  |
| PvulWRKY73-3 | Phvul.003G068700 | 0      | 0      | 0.132  | 0      | 0.030  | 0      | 0      | 0.150  | 1.254  | 1.666  |
| PvulWRKY73-4 | Phvul.002G089700 | 0      | 0      | 0      | 0.056  | 0.027  | 0      | 0.062  | 0.034  | 0.354  | 0.134  |
| PvulWRKY75   | Phvul.001G088200 | 0.324  | 0.108  | 39.026 | 1.813  | 15.373 | 3.600  | 2.214  | 1.851  | 3.023  | 2.485  |
| PvulWRKY79-1 | Phvul.005G080200 | 0      | 0      | 0      | 0      | 0      | 0      | 0      | 2.622  | 0.876  | 0.303  |
| PvulWRKY79-2 | Phvul.005G080400 | 0      | 0.078  | 0.094  | 0.090  | 0.087  | 0      | 0.100  | 0.522  | 0.531  | 0.479  |
| PvulWRKY79-3 | Phvul.005G080300 | 1.039  | 0.065  | 0      | 0      | 0      | 0      | 0      | 2.450  | 1.792  | 1.516  |
| PvulWRKY97   | Phvul.002G081600 | 3.199  | 3.171  | 3.313  | 1.612  | 5.572  | 11.458 | 7.644  | 3.026  | 5.062  | 4.103  |

## Supplementary Figure 1

|            |             |            |             |             |            |                    |                    |                 |                    |                    |                     |                     |                     |
|------------|-------------|------------|-------------|-------------|------------|--------------------|--------------------|-----------------|--------------------|--------------------|---------------------|---------------------|---------------------|
| AcWRKY9    | -----       | -FKSTSDQLQ | QGG--QMSSP  | PNRKARVSVR  | ARCQ--DATM | NDGCQ- <b>WRKY</b> | <b>GQK</b> IAKGNPC | <b>PR</b> ----- | ---- <b>AYYRCT</b> | V--SPG <b>CPVR</b> | <b>KQVQR</b> CQE--  | - <b>DMSILITTY</b>  | EGT <b>HNH</b> PLPV |
| CsaWRKY9   | -----       | -FNSIQNKPQ | RPELQAMAPP  | QNRKARVSVR  | ARCE--SATM | NDGCQ- <b>WRKY</b> | <b>GQK</b> IAKGNPC | <b>PR</b> ----- | ---- <b>AYYRCT</b> | V--APG <b>CPVR</b> | <b>KQVQR</b> CLE--  | - <b>DMSILITTY</b>  | EGT <b>HNH</b> PLPV |
| AcWRKY42   | GWVPN---K   | LSKLNPK    | GVDQAS-EAT  | M-RKARVSVR  | ARSE--APMI | TDGCQ- <b>WRKY</b> | <b>GQK</b> MAKGNPC | <b>PR</b> ----- | ---- <b>AYYRCT</b> | M--ATG <b>CPVR</b> | <b>KQVQR</b> CAE--  | - <b>DR</b> TILITTY | EGN <b>HNH</b> PLPP |
| CsaWRKY31  | GWGPNHKTTPR | FNNSSN--SK | PLDQST-EAT  | M-RKARVSVR  | ARSE--APMI | SDGCQ- <b>WRKY</b> | <b>GQK</b> MAKGNPC | <b>PR</b> ----- | ---- <b>AYYRCT</b> | M--AVG <b>CPVR</b> | <b>KQVQR</b> CAE--  | - <b>DR</b> TILITTY | EGN <b>HNH</b> PLPP |
| PaWRKY6    | PESPDHDSWT  | ANKAQKVTK  | CAIDQT-EAT  | I-RKARVSVR  | ARSE--APMI | SDGCQ- <b>WRKY</b> | <b>GQK</b> MAKGNPC | <b>PR</b> ----- | ---- <b>AYYRCT</b> | M--AVG <b>CPVR</b> | <b>KQVQR</b> CAE--  | - <b>DR</b> SVLVTTY | EGS <b>HNH</b> PLPP |
| AlWRKY42   | G-----      | -NGSENASNK | VIEQAAAEEAT | M-RKARVSVR  | ARSE--ANML | SDGCQ- <b>WRKY</b> | <b>GQK</b> MAKGNPC | <b>PR</b> ----- | ---- <b>AYYRCT</b> | M--AVG <b>CPVR</b> | <b>KQVQR</b> CAE--  | - <b>DR</b> TILITTY | EGN <b>HNH</b> PLPP |
| ZmWRKY43   | GW-----     | --LSNKVAKF | LPVKGPEPAT  | M-RKARVSVR  | ARSE-----I | SDGCQ- <b>WRKY</b> | <b>GQK</b> MAKGNPC | <b>PR</b> ----- | ---- <b>SYYRCT</b> | M--AAG <b>CPVR</b> | <b>KQVQR</b> CAE--  | - <b>DT</b> TVVVTTY | EGN <b>HNH</b> PLPP |
| AtWRKY6    | K-----      | -IQKVNSTTP | TTFDQTAEAT  | M-RKARVSVR  | ARSE--APMI | SDGCQ- <b>WRKY</b> | <b>GQK</b> MAKGNPC | <b>PR</b> ----- | ---- <b>AYYRCT</b> | M--ATG <b>CPVR</b> | <b>KQVQR</b> CAE--  | - <b>DR</b> SILITTY | EGN <b>HNH</b> PLPP |
| BrWRKY6-2  | K-----      | -VQKVNNSP  | TTFDQPGEAI  | M-RKARVSVR  | ARSE--APMI | SDGCQ- <b>WRKY</b> | <b>GQK</b> MAKGNPC | <b>PR</b> ----- | ---- <b>AYYRCT</b> | M--ATG <b>CPVR</b> | <b>KQV</b>          | -----               | ----- <b>H</b> PLPP |
| LuWRKY42-1 | GWTPNKLKPKF | EACASSSAEA | EERKAENTLS  | MIKKARVSVR  | ARSE--AAMM | NDGCQ- <b>WRKY</b> | <b>GQK</b> MAKGNPC | <b>PR</b> ----- | ---- <b>AYYRCT</b> | M--ASG <b>CPVR</b> | <b>KQVQR</b> CAE--  | - <b>DQ</b> SILITTY | EGH <b>SH</b> PLPP  |
| SiWRKY97   | DDAAASPPCA  | TRKSPSAAGE | GVDDEVQQA   | --KKARVSVR  | VKCD--TPTM | PDGCQ- <b>WRKY</b> | <b>GQK</b> ISKGNPC | <b>PR</b> ----- | ---- <b>AYYRCT</b> | V--APH <b>CPVR</b> | <b>KQVQR</b> CAE--  | - <b>DT</b> TILITTY | EGQ <b>HNH</b> QLPP |
| EgWRKY47   | P           | RLEPSKGGE  | EQ LADM     | PFRKARVSVR  | ARSE APSI  | SDGCQ <b>WRKY</b>  | <b>GQK</b> MAKGNPC | <b>PR</b>       | <b>AYYRCT</b>      | M AVG <b>CPVR</b>  | <b>KQVQR</b> CAD    | <b>DK</b> AILITTY   | EGN <b>HNH</b> PLPP |
| OsWRKY9    | A-----      | -AAAPARENG | EQQAAAAAEL  | PCRKPRVSVR  | ARSE--APMI | SDGCQ- <b>WRKY</b> | <b>GQK</b> MAKGNPC | <b>PR</b> ----- | ---- <b>AYYRCT</b> | M--AIG <b>CPVR</b> | <b>KQVQR</b> CAE--  | - <b>DK</b> TVLITTY | EGN <b>HNH</b> QLPP |
| OsWRKY5    | P-----      | -AAEMA---- | -----       | PCRKARVSVR  | ARSE--APMI | SDGCQ- <b>WRKY</b> | <b>GQK</b> MAKGNPC | <b>PR</b> ----- | ---- <b>AYYRCT</b> | M--ASQ <b>CPVR</b> | <b>KQVQR</b> CAE--  | - <b>DK</b> SILITTY | EGT <b>SH</b> PLPP  |
| PhWRKY1    | R-----      | -QQQEA---- | -----       | SMRKARVSVR  | ALSE--APII | ADGCQ- <b>WRKY</b> | <b>GQK</b> MAKGNPC | <b>PR</b> ----- | ---- <b>AYYRCT</b> | M--ANAC <b>PVR</b> | <b>KQVQR</b> CAE--  | - <b>DR</b> SILITTY | EGT <b>HNH</b> PLPP |
| CsWRKY72-1 | QEPTBIWSPS  | KINIKSKRSD | DQDEEVFQKA  | QLKKARVSVR  | ARCD--TPTM | NDGCQ- <b>WRKY</b> | <b>GQK</b> IAKGNPC | <b>PR</b> ----- | ---- <b>AYYRCT</b> | I--SPT <b>CPVR</b> | <b>KQVQR</b> RWHE-- | - <b>DMS</b> LITTY  | EGT <b>HNH</b> PLPI |
| EgWRKY72-2 | EA-AETWSPN  | KV--LKTMR  | GGDDEVSQQN  | PVKKARVSVR  | ARCD--AATM | NDGCQ- <b>WRKY</b> | <b>GQK</b> IAKGNPC | <b>PR</b> ----- | ---- <b>AYYRCT</b> | V--APSC <b>PVR</b> | <b>KQVQR</b> CAE--  | - <b>DMS</b> LITTY  | EGT <b>HNH</b> PLPM |
| PtWRKY72-1 | EA-GETWPPS  | KI--IPKRN- | GDHDEAAQQS  | QAKRARVCVR  | TRCE--TPTM | NDGCQ- <b>WRKY</b> | <b>GQK</b> ISKGNPC | <b>PR</b> ----- | ---- <b>AYYRCT</b> | V--APL <b>CPVR</b> | <b>KQVQR</b> CAE--  | - <b>DT</b> SILITTY | EGT <b>HNH</b> PLPV |
| VvWRKY72-1 | AA-GESWPPS  | KS--LKTMR- | TGDEEISQQN  | PAKRCRVSVR  | ARCD--TPTM | NDGCQ- <b>WRKY</b> | <b>GQK</b> IAKGNPC | <b>PR</b> ----- | ---- <b>AYYRCT</b> | V--APSC <b>PVR</b> | <b>KQVQR</b> FAE--  | - <b>DMS</b> LITTY  | EGT <b>HNH</b> PLPY |
| RcWRKY61   | EEPTETWSPN  | KI--RKTTI- | TPDDEAMQQN  | QIKKTRVSVR  | ARCD--TPTM | NDGCQ- <b>WRKY</b> | <b>GQK</b> IAKGNPC | <b>PR</b> ----- | ---- <b>AYYRCT</b> | A--SPT <b>CPVR</b> | <b>KQVQR</b> CAK--  | - <b>DMS</b> VLITTY | EGT <b>HNH</b> PLPL |
| AcWRKY31   | PEHDTLGSWG  | KNKCPKKEIQ | TKSIEQVPDA  | SLRKARVSVR  | ARSD--APMI | SDGCQ- <b>WRKY</b> | <b>GQK</b> MAKGNPC | <b>PR</b> ----- | ---- <b>AYYRCT</b> | M--SMG <b>CPVR</b> | <b>KQVQR</b> CAE--  | - <b>DK</b> TILTITY | EGN <b>HNH</b> PLPP |
| AtWRKY9    | N-----      | -----      | -----       | --RKARVSVR  | ARCE--TATM | NDGCQ- <b>WRKY</b> | <b>GQK</b> TAKGNPC | <b>PR</b> ----- | ---- <b>AYYRCT</b> | V--APG <b>CPVR</b> | <b>KQVQR</b> CLE--  | - <b>DMS</b> LITTY  | EGT <b>HNH</b> PLPV |
| PpWRKY23   | E-----      | -TSNSSSMEQ | GQKMKGPKR-  | -PREPRYEFK  | TRSE--VDVI | DDGYK- <b>WRKY</b> | <b>GQK</b> PKVSSPH | <b>PR</b> ----- | ---- <b>NYYRCT</b> | ---TAN <b>CPVR</b> | <b>KRVER</b> SIE--  | - <b>DP</b> SLIVTSY | EGT <b>H</b> THPKIN |
| EgWRKY28-1 | IQDEQSTGCH  | EDHGREE-KS | KNGDK-SKKK  | -EKRPRQPRF  | AFLTKSEIDN | LEDGYR <b>WRKY</b> | <b>GQK</b> AVKNSAF | <b>PR</b> ----- | ---- <b>SYYRCT</b> | S---QGC <b>VMK</b> | <b>KRVER</b> SFQ--  | - <b>DPS</b> IVVITY | EGQ <b>HNH</b> HSPA |
| PvWRKY3-1  | FHKDMMCTG   | SKPPAPGKTT | GGNNNNKKS   | GKKRARQARF  | AFMTKSDVDH | LEDGYR <b>WRKY</b> | <b>GQK</b> AVKNSPF | <b>PR</b> ----- | ---- <b>SYYRCT</b> | N---SK <b>CTVK</b> | <b>KRVER</b> SSD--  | - <b>DPS</b> VVITY  | EGQ <b>H</b> CHHTVT |
| GrWRKY51-1 | SCW----EVP  | GCNSFAYQNY | DDKGSANTED  | INGDGLRPFKI | AFRTKSDIEI | MDDGYR <b>WRKY</b> | <b>GKK</b> KVKNNPN | <b>PR</b> ----- | ---- <b>NYYQCS</b> | S---EG <b>CKVK</b> | <b>KRVER</b> ERE--  | - <b>DPR</b> FVITY  | VGK <b>HNH</b> ETLS |

## Supplementary Figure 1

**Multiple sequence alignment of a single WRKY domain containing (C-terminal) WRKY transcription factor.** The sequence alignment shows the presence of conserved W-R-K-Y-G-Q-K, P-R-x-Y-Y-x-C-x<sub>5</sub>-C, K-x-V and H-x-H domains. Red indicates a conserved consensus of 90% or more. Multiple sequence alignment was carried out using the Multalin software (<http://multalin.toulouse.inra.fr/multalin/>) with the default parameters.



Supplementary Fig. 2

|            |            |            |             |                   |                  |             |            |           |            |                   |            |             |            |              |                |            |             |            |             |
|------------|------------|------------|-------------|-------------------|------------------|-------------|------------|-----------|------------|-------------------|------------|-------------|------------|--------------|----------------|------------|-------------|------------|-------------|
| AcWRKY26   | YNQYAQPT-- | QTLRE----  | RRSDDGYNWR  | <b>KYGQKQVKGS</b> | <b>ENPRSYKCT</b> | -FPNCPTKKK  | VERSLDG-QI | TEIIVYKGS | <b>SHN</b> | <b>HAKPQSTRRS</b> | SASS-QSIQ- | AAVVPSSSEV  | SDHFGSHGNT | QMSDVT----   | -----TPE       | NSSI-----  | -----S      | IGDEDLDRSS |             |
| SlWRKY26   | GNQY--N-   | QSIRES---  | KRSDDGYNWR  | <b>KYGQKQVKGS</b> | <b>ENPRSYKCT</b> | -YPCPTKKK   | VERSLDG-QI | TEIIVYKGS | <b>HN</b>  | <b>HKPQSTRRS</b>  | SSST-ASSAF | QSYNTQTNEI  | PDHQSYSNG  | QMSDVA----   | -----TPE       | NSSI-----  | -----S      | FGDDHDEHTS |             |
| BdWRKY70   | YSTAPAGTGV | RAQSG----  | RSSDDGYNWR  | <b>KYGQKQVKGS</b> | <b>ENPRSYKCT</b> | -APGCPKKK   | VQAPDGH-QI | TEIIVYKGS | <b>HN</b>  | <b>HKPQLNARR</b>  | GSSS-GSGAL | SSYAMQGGAG  | ADMNNEVPA  | DALS-G----   | -----TPE       | NSSA-----  | -----S      | YGDVVAN--  |             |
| GmWRKY20   | ASHVEVRGSG | LSVAA----  | RSSDDGYNWR  | <b>KYGQKQVKGS</b> | <b>ENPRSYKCT</b> | -HPNCEVKKK  | VERSLDG-QI | TEIIVYKGS | <b>HD</b>  | <b>HKFPQPCRY</b>  | STGTVMSIQG | ERSDKASMAC  | RDDKATAMYG | QVSHAAEPNS   | -----TPE       | SSPV-----  | -----A      | TNDGLEGVGA |             |
| CsaWRKY33  | YNR-----   | ---EQ---   | KSENDDGYNWR | <b>KYGQKQVKGS</b> | <b>ENPRSYKCT</b> | -FSPCPTKKK  | VERSLDG-QI | TEIIVYKGS | <b>HN</b>  | <b>HAKPQSTRRS</b> | SNSG-----  | -VYDPSAAET  | GVLQ-----  | -----E       | DCSV-----      | -----S     | VGEEFEPNS   |            |             |
| CzWRKY58   | RNHNNPANN  | SRSYNVVND  | KPADDDGYNWR | <b>KYGQKQVKGS</b> | <b>EYPRSYKCT</b> | -HVNCPVKKK  | VERSLDG-QI | TQIIVYKGS | <b>HD</b>  | <b>HLRPN--NR</b>  | GGGSRDVS-- | -----       | -----      | -----EAGDHIH | FVVG-----      | -----G     | AGHVMESSDD  |            |             |
| MgWRKY3    | SRSDSNPQK  | SQPHNLK-   | TPSEDGYNWR  | <b>KYGQKQVKGS</b> | <b>EYPRSYKCT</b> | -HSNCPVKKK  | VERSLDG-QI | TEIIVYKGS | <b>HN</b>  | <b>HELPN--KRT</b> | KDNMSNS--  | -----       | -----      | -----VKQVTH  | -----          | -----      | EHVSEYSD    |            |             |
| MeWRKY4-1  | SSDPS-PDQR | SOASSLV-VD | KPTDDGYNWR  | <b>KYGQKQVKGS</b> | <b>EYPRSYKCT</b> | -QPTCEVKKK  | VERSLDG-QV | TEIIVYKGS | <b>HN</b>  | <b>HQAQP-KRA</b>  | KDAG-SLNGN | SSNQSKFELA  | SQFQSGNVNK | SKD-----     | -----RKQDS     | QATH-----  | -----E      | LLSGSDSEE  |             |
| PperWRKY3  | SSDISHSDQR | SQSSPFI-VD | KPNDDGYNWR  | <b>KYGQKQVKGS</b> | <b>EYPRSYKCT</b> | -HSPNCPVKKK | VERSLDG-QI | TEIIVYKGS | <b>HN</b>  | <b>HERPQS-KRA</b> | KDAG-IPNIG | I--QANPDLA  | SVHGHHLSK  | SK-----      | -----KQDSS     | QATH-----  | -----E      | LLSGTSDSEE |             |
| MdWRKY58   | SPEASHSDKK | YQP-S-S-TD | RPADDGYNWR  | <b>KYGQKQVKGS</b> | <b>EYPRSYKCT</b> | -HMNCPVKKK  | VERSPNG-EI | TEIIVYKGS | <b>HN</b>  | <b>HEVPQSKRP</b>  | KD-G-DLNG  | -----KPENG  | LQRIGDNR   | SSENLPAHS-   | -----RXEMQDST  | QAAP-----  | -----G      | QLPGENDNEE |             |
| PvWRKY4-1  | LTEPFSHSEK | YQPPA-A-VD | KPTHDDGYNWR | <b>KYGQKQVKGS</b> | <b>EYPRSYKCT</b> | -HLNCPVKKK  | VERSSDG-QI | TEIIVYKGS | <b>HN</b>  | <b>HDLPQPNKRS</b> | KDCN-DSNGS | IHLQSKPEVG  | SQAQAGNAIK | LTETLPAYS-   | -----VIGRDQEST | QADP-----  | -----S      | PPPGNDNEE  |             |
| MdWRKY3-2  | TSEITHSDKK | YQSSSLP-ID | KPADDDGYNWR | <b>KYGQKQVKGS</b> | <b>EYPRSYKCT</b> | -HLNCPVKKK  | VERSLDG-QI | TEIIVYKGS | <b>HN</b>  | <b>HKPQPNRRV</b>  | KENNSDLNGN | SQWGFNSNK   | ISEIIVDSSP | PEPESDLTSN   | -----QGAI      | -----      | -----R      | PRPGSSESE  |             |
| PtWRKY82   | CRQLADKPFV | SEPKSPHLVN | MVA-DGFWNR  | <b>KYGQKQVKGS</b> | <b>ENSRSYKCT</b> | -SSGCAKKK   | VEHPDGH-HV | TEIIVYKGS | <b>HN</b>  | <b>HEPPPTRFA</b>  | KEKVTPIISV | SGGETLRLVN  | TEILLESSTP | CK-----      | -----SDHFAV    | SETC-----  | -----E      | QQLFCSDDSE |             |
| GrWRKY32-1 | KANQKQSYNL | KMVSVPVIV  | TPSEDGYNWR  | <b>KYGQKQVKGS</b> | <b>KGSRSYKCT</b> | -FSDCQAKKI  | ECSDDTG-HV | LEVVNGAHN | <b>HK</b>  | <b>PKPPNNFT</b>   | RESKIVISAA | ---RASHNIQ  | PIRIFNDSDP | STSS-----    | -----KESVPE    | TVVN-----  | -----P      | ERKGLFSCGS |             |
| PvuWRKY32  | KVDKSPSGG  | TTLSSVSVTR | ASASDGYNWR  | <b>KYGQKQVKGS</b> | <b>TGSRSYKCT</b> | -HSNCAKKI   | KFCDHSG-HV | LEIIVYKGS | <b>HD</b>  | <b>HPPHKIDST</b>  | KECKFLPYSE | PKMKCSVPKQ  | SSVRNDSDP  | SSSP-----    | -----KEPLYE    | SPCS-----  | -----A      | KRN-LENSN  |             |
| AtWRKY1    | SSGALSLQSG | SEGNSPFIRE | KVMEDGYNWR  | <b>KYGQKQVKGS</b> | <b>EYPRSYKCT</b> | -HPNCAKKQK  | LERSAGG-VQ | VTIVYFGHD | <b>HK</b>  | <b>PKPLAGAV</b>   | INQKRSDFV  | TAVSKGEORJ  | DIVSLIYKLC | IVS-----     | -----YDIM      | FVEKTSGGSV | QTLRQTPEPK  | IHGHLVSVI  |             |
| BrWRKY2-1  | EVEEGEGEEQ | RGVDSMVGGG | APAEEDGYNWR | <b>KYGQKQVKGS</b> | <b>EYPRSYKCT</b> | -HPNCQVKKK  | VERSPNG-EI | TEIIVYKGS | <b>HN</b>  | <b>HSKPPNRRS</b>  | GM-QLDGTQ  | AEQQQQQQQR  | DNTQQVGSN  | ENNVEEGN--   | -----QSAQT     | GGYEGSDVI  | VVDASSTFSP  | DE-----E   | EDDRGTHGSA  |
| CsWRKY2    | QDEEGDQRS  | GDSMVAAGG  | ASSEDGYNWR  | <b>KYGQKQVKGS</b> | <b>EYPRSYKCT</b> | -HPNCQVKKK  | VERSLDG-QI | TEIIVYKGS | <b>HN</b>  | <b>HPKPPNRRS</b>  | AIGSN--LL  | MQLDIDHEAG  | LQSGADTNPV | WANTQKGTG    | -----PWRHD     | TVEVTSAAVP | GPBYCNQSSA  | LQAQNGTPE  | SGDAVSDAS   |
| RcWRKY34-2 | QDEEGDQRAS | AEYM-AGSGG | TPSEDGYNWR  | <b>KYGQKQVKGS</b> | <b>EYPRSYKCT</b> | -HPNCPVKKK  | VERSPNG-EI | TEIIVYKGS | <b>HN</b>  | <b>HPKPPNRRS</b>  | AIGSNSIMD  | MQLDVPBQGT  | WASQQGTGAT | GT--PDWRH    | -----NVEVTSASV | GPFGNHSSA  | VPALNGTNEF  | SGDAIDASST |             |
| OsWRKY30   | EENATKN--  | -BEYSDDLII | TPAEDGYNWR  | <b>KYGQKQVKGS</b> | <b>EYPRSYKCT</b> | -FTNCAVKK-  | VERSDG-QI  | TEIIVYKGS | <b>HN</b>  | <b>HPPLPNNRR</b>  | NVPFSS-FND | LRDDHSEKFG  | SKSQGATATS | WENAANGHL-   | -----QDVGS     | VLTKLSASLT | TTEHAEKSV-  | -----MD    | KQEAVIDISST |
| PvWRKY80   | PAEBEGDTRG | -DYHPAMAAT | TPAEDGYSWR  | <b>KYGQKQVKGS</b> | <b>EYPRSYKCT</b> | -HPNCPVKKK  | VERSPNG-EI | TEIIVYKGS | <b>HN</b>  | <b>HPKQASRRP</b>  | GVVPVHPFVE | ---GAQADAP  | DNRPHTNTA  | EARQAWHNNA   | GV--KDLPG      | GMDAASPVS  | PGELCDSSAS  | MQIHD--AG  | QVDATSAA    |
| EgWRKY2-1  | RIDNAHEEDQ | KGMVSVGTV  | RTSEDDGYNWR | <b>KYGQKQVKGS</b> | <b>EYPRSYKCT</b> | -QPNCAVKKK  | VERSLDG-QI | TEIIVYKGS | <b>HN</b>  | <b>HPKQPIRCG</b>  | LLRSSFSLNE | MS-EMADGSG  | AAKVEAGSV  | WRNNLGGSD    | VRLGPDWSDP     | GPEDSTSTV  | TLESLDLEST  | SGQKCAVAF  | SAQTELSST   |
| LuWRKY2-1  | KIDGMHEEDQ | KGTFMGTGRT | RTESEDGYSWR | <b>KYGQKQVKGS</b> | <b>EYPRSYKCT</b> | -SLSCQVKKK  | VERSLDG-QI | TEIIVYKGS | <b>HN</b>  | <b>HPKQSVRRA</b>  | ---QPDWCH  | FP--EIDDGSE | SKCVTEAGSV | QRNNPEGS--   | -----DWARA     | EMERTSSPSV | VTELSLLEST  | GQKPVVTV   | SVCTPELSA   |
| CpWRKY44   | TAAQNLEEDQ | KTSSVVVSSD | RPSYDGYNWR  | <b>KYGQKQVKGS</b> | <b>EYPRSYKCT</b> | -HPNCPVKKK  | VERSPNG-EI | AEIIVYKGS | <b>HN</b>  | <b>HPKPPPKRS</b>  | SSGTQGLVLA | SEGSAQDGN   | SLPNNQLNER | TEGSEGRV--   | -----ENQNM     | GLSC--FQGR | YPPAYEPTAA  | GT-----IH  | VTGNSENSL   |
| FvWRKY44   | IVSQNMEEDA | KNI PAAANS | RPSYDGYNWR  | <b>KYGQKQVKGS</b> | <b>EYPRSYKCT</b> | -HPNCPVKKK  | VERSLDG-QI | AEIIVYKGS | <b>HN</b>  | <b>HSKPPPKRS</b>  | SSGTQSGGPA | SDATGQDYNT  | RLWNSHLNEK | NEGSEGRV--   | -----EDQNEV    | GIPVHSYQSK | NI VHYDPLAT | GK-----LN  | AGTATPDNSC  |
| AlWRKY26   | MVTQSLPQLD | VSKSEIMSRN | KTSDDGYNWR  | <b>KYGQKQVKGS</b> | <b>ENPRSYKCT</b> | -YPCNTKKK   | VETSLVKGQI | TEIIVYKGS | <b>HN</b>  | <b>HKPQSTRRS</b>  | SSTT-----  | -----       | -----      | -----        | -----          | -----      | -----       | -----      | AAHQNS      |

541

720

**Multiple sequence alignment of double (N- and C-terminal) WRKY domain protein.** The N-terminal region shows the presence of conserved D-G-Y-N-W-R-K-Y-G-Q-K, R-S-Y-Y-x-C-X<sub>1</sub>-C-X<sub>22</sub>-H-x-H domain and the C-terminal region shows the presence of conserved D-G-Y-R-W-R-K-Y-G-Q-K, R-S-Y-Y-x-C-X<sub>4</sub>-C, V-R-K-H-V-E, and H-x-H domains. Red mark indicates conserved consensus of 90% or more. Multiple sequence alignment was carried out using multalin software (<http://multalin.toulouse.inra.fr/multalin/>) with the default parameters.

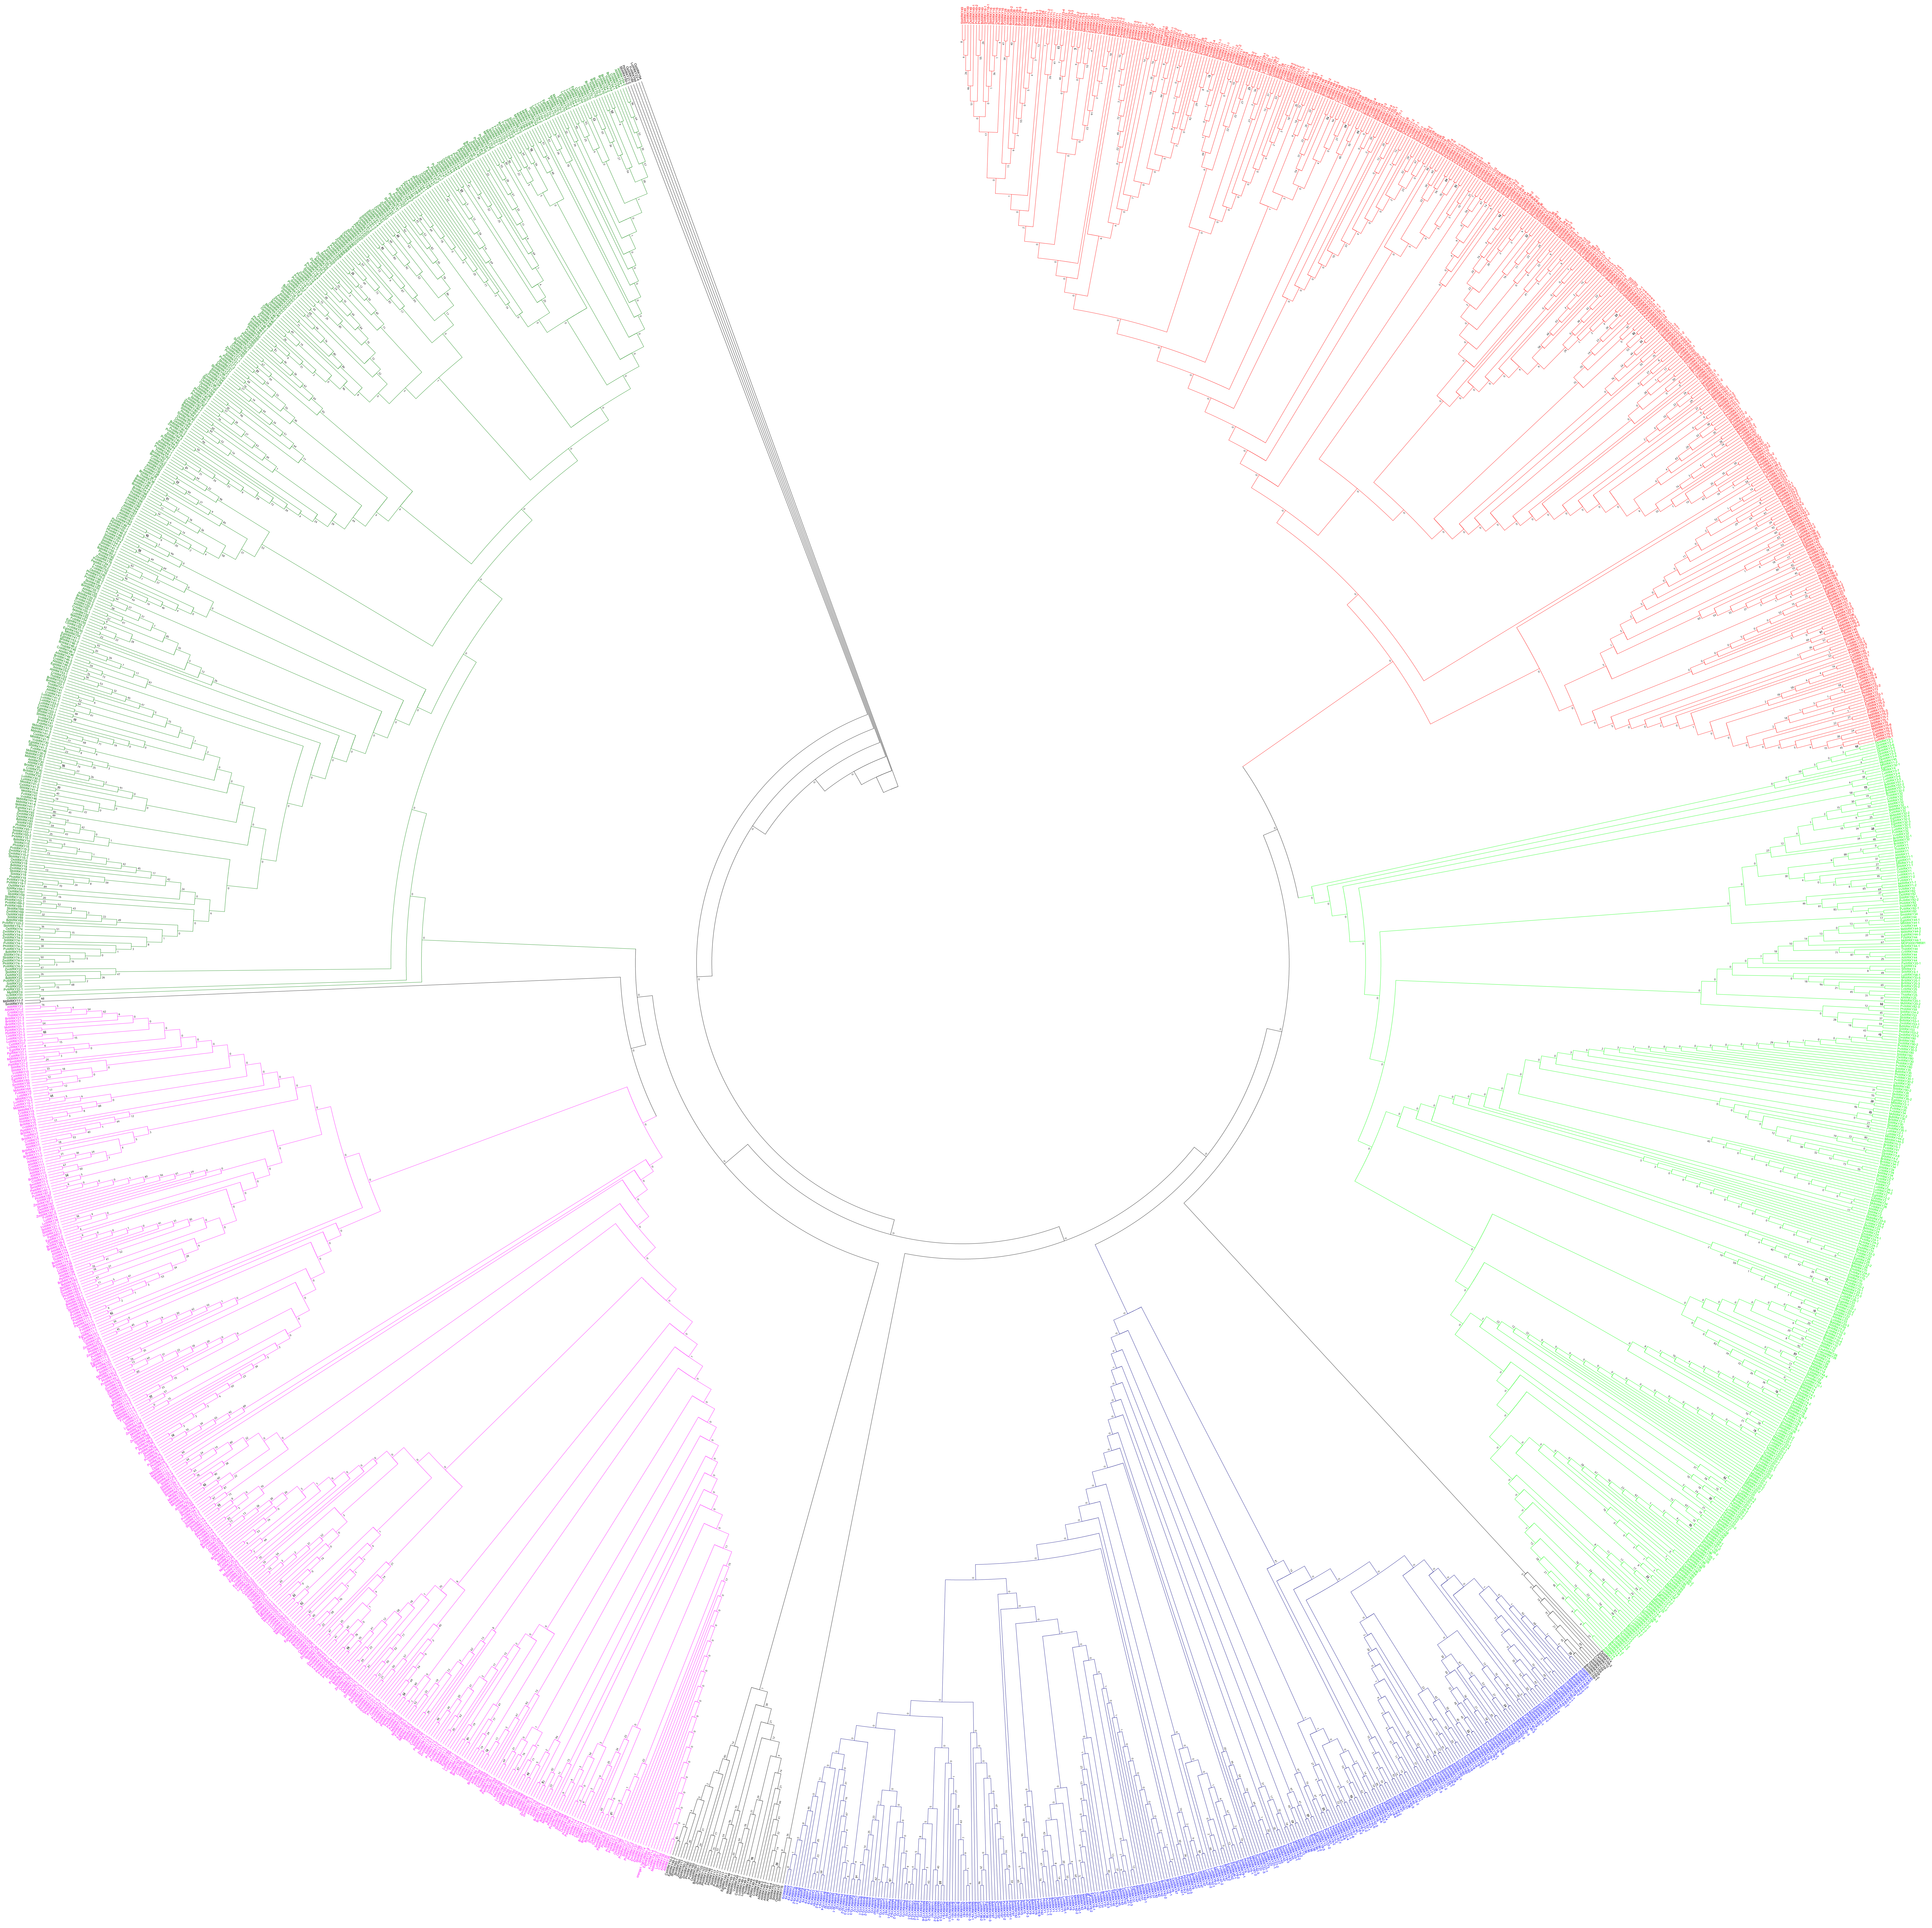

Supplement: srep37309-s1.pdf [file srep37309-s1.pdf]
